# Supplementary material for: Potato Root-Associated Microbiomes Adapt to Combined Water and Nutrient Limitation and have a Plant Genotype-Specific Role for Plant Stress Mitigation
Source: Research Square preprint supplement (doi:10.21203/rs.3.rs-492999/v1), 2021-05-07
Supplement: Supplementary file 1 [file ae8e196a29efd91c64198232.xlsx]

## Sheet: Sup_Table 2_asv_stress_nostress
Supplemental Table 3, Amplicon sequencing variants (ASVs) with significant differences (FDR<0.001) in normalized counts of the amplicon sequences. Differences between stressed with 'A' and not stressed 'B' potato plants in roots and rhizosphere targeting sequences for the classification of fungi (ITS) and bacteria (16S rRNA gene). Fold changes are given as log2FC and the log2FC standard error (lo…
material	target		mean sequence number			fold change (A/B)			statistics			classification
			A (stress)	B (no stress)		log2FC	log2 FC SE		pvalue	FDR		order	genus	species		ASV	sequence
root	ITS, fungi		367.044	4.46891		23.8714	2.83812		4.06473e-17	8.53593e-16		Sordariales	NA	NA		ASV_91	CTGAGTGCAAACTCTCCAACCATTGTTTATCTACCTATTTTTGCTTCTCCGGCAGGCGGTTCCAGGGAGGGACCGAGCCTATGGCCTAGCCTAAGCACCTGCCGAAGGGGTATCCACTGCTCTATATTATACTGTCTGAGAAAACAAAAAAAAATATCA
			61.8753	9.0933		23.1265	2.90473		1.69765e-15	2.37671e-14		Sordariales	Podospora	appendiculata		ASV_14	CAGAGTTGCAAAACTCCCTTAAACCATCGCGAACGTACCCGTACCGTTGCTTCGGTGGGCGGCTCCAGGGCGGAGCCGCAGCCTTCACAGGCGCCCGCCGGAGGACCTATACCTAACTATTTATCTTAACTGGCCTCTCTGAGTATTTTTATAATAAGTAA
			91.2362	0		25.7676	2.08876		5.77333e-35	2.4248e-33		Saccharomycetales	Cyberlindnera	jadinii		ASV_101	GAGAACCTGGGCCTGCGCTTCTAGCGCGGCTCCAACCAATACACAGTGTATTTTGCTTCTTTTGCTTTGGCTCTGCCAAAGGTTTTAAACACAGAAATTTATTTTCTCTAGAAACTAGTCAATTTGAATTTTAATCTTCA..
			308.683	0		24.3459	2.9043		5.17289e-17	8.69045e-16		NA	NA	NA		ASV_90	CCAATGGAAAAGGGATTTCAACTTGTTGAAATTCCCTTTTTTACCATATAACAAAACCCCAACCAATGCACTTATTGAAAGGATTTATTGACTTTTTTTCTGTATATTATGTCTGAACAATTTTACTTAACAAGTAAAAAAAAAAATTTAATA
			53.5586	3.20024		24.5065	2.62201		9.06289e-21	2.53761e-19		Glomerellales	Plectosphaerella	NA		ASV_112	CTGAGTACTACACTCTCTACCCTTTGTGAACTATTATACCTGTTGCTTCGGCGGCGCCCGCAAGGGTGCCCGCCGGTCTCATCAGAATCTCTGTTTTCGAACCCGACGATACTTCTGAGTGTTCTTAGCGAACTGTAA
			308.465	0.692136		27.3047	1.7931		2.31966e-52	1.94851e-50		Eurotiales	Aspergillus	NA		ASV_39	CTGAGTGCGGGCTGCCTCCGGGCGCCCAACCTCCCACCCGTGACTACCTAACACTGTTGCTTCGGCGGGGAGCCCTCTCGGGGGCGAGCCGCCGGGGACTACTGAACTTCATGCCTGAGAGTGATGCAGTCTGAGTCTGAATATAAAATCAGTCA
rhizo	ITS, fungi		3218.45	616.375		2.38471	0.479141		6.4556e-07	2.03351e-05		Thelebolales	Pseudeurotium	NA		ASV_3	AAGAGACGTTGCCCTTCGGGGTATACCTCCCACCCTTTGTTTATTATACCTTTGTTGCTTTGGCGGGCCCGTCCTCGGACCACCGGCTTCGGCTGGTCAGTGCCCGCCAGAGGACCTAAAACTCTGTTTGTTCATATTGTCTGAGTACTATATAATAGTTA
			169.007	15.261		3.46715	0.600737		7.85724e-09	4.95006e-07		NA	NA	NA		ASV_89	GTGAAATCATAGGACGTCTGCCGCAAGCAGAGTCCGAAACCTCACACACACCCTCACACTGTGCACTATATCTGCGAAACGGGTCTCACGACCCCGACTAGCTGCTTATTATTACAAAATCTAGTCCATGTATGTCAAACAAAAATATAATAATGAA
			16.1947	139.235		-3.12164	0.681631		4.65741e-06	9.78057e-05		NA	NA	NA		ASV_77	CATAATAGTTTGTGTGTGCGCAAGCACTCCAACACAACAAATCCTTGTGAACCGTAATTGACACCTTTGGTGTGTGCGCAAGCGCATGCCAAACGGTAACAACAACCAAAAACACTTGTTAAACACGTAAAGACTTATCGATTTATATACAAATCTAAATA..
			2.73298	44.3957		-3.97182	0.903143		1.09365e-05	0.000172249		Helotiales	Hymenoscyphus	menthae		ASV_51	TCGTGTTCCTGCCCCTCTGGGTAGAAACCTCACCCTATGTTTAAACCTATCTCTGTTTCCCTGGCGGGCCGCCTTAGGGCACTGGCTCCGGCCGGATCGCGCTCGTCGGGGACATTACAAACCCTGTTTGCAAGTCTGTCTGAGTACTATATCAATAGTTA..
root	16S, bacteria		26.6955	0.514036		6.07926	1.15359		1.36539e-07	2.02166e-06		Streptosporangiales	Nonomuraea	NA		ASV_658	GGTAGTCCACGCTGTAAACGTTGGGCGCTAGGTGTGGGGATCTTCCACGATCTCCGTGCCGGAGCTAACGCATTAAGCGCCCCGCCTGGGGAGTACGGCCGCAAGGCTAAAACTCAAAGGAATTGACGGGGGCCCGCACAAGCGGCGGAGCATGTTGCTTAATTCGACGCAACGCGAAGAACCTTACCAAGGTTTGACATCACCCGGAAACGTGCAGAGATGTGCGCCTCTTCGGACTGGGTGACAGGTGGTGCATGGCTGTCGTCAGCTCGTGTCGTGAGATGTTGGGTTAAGTCCCGCAACGAGCGCAACCCTTGTTCCATGTTGCCAGCACGCTCCTTCGGGGGTGGTGGGGACTCATGGGAGACTGCCGGGGTCAACTCG
			259.467	5.49386		5.55617	0.66653		7.68648e-17	1.85689e-15		Streptosporangiales	Nonomuraea	salmonea		ASV_90	GGTAGTCCACGCTGTAAACGTTGGGCGCTAGGTGTGGGGATCTTCCACGATCTCCGTGCCGGAGCTAACGCATTAAGCGCCCCGCCTGGGGAGTACGGCCGCAAGGCTAAAACTCAAAGGAATTGACGGGGGCCCGCACAAGCGGCGGAGCATGTTGCTTAATTCGACGCAACGCGAAGAACCTTACCAAGGTTTGACATCACCCGGAAACGTGCAGAGATGTGCGCCTCTTCGGACTGGGTGACAGGTGGTGCATGGCTGTCGTCAGCTCGTGTCGTGAGATGTTGGGTTAAGTCCCGCAACGAGCGCAACCCTTGTTCCATGTTGCCAGCAACCTCTTCGGAGGGTTGGGGACTCATGGGAGACTGCCGGGGTCAACTCG
			32.849	0		24.1679	1.62183		3.21662e-50	2.95286e-48		Streptomycetales	Streptomyces	NA		ASV_268	GGTAGTCCACGCCGTAAACGTTGGGAACTAGGTGTGGGCGACATTCCACGTTGTCCGCGCCGCAGCTAACGCATTAAGTTCCCCGCCTGGGGAGTACGGCCGCAAGGCTAAAACTCAAAGGAATTGACGGGGGCCCGCACAAGCGGCGGAGCATGTGGCTTAATTCGACGCAACGCGAAGAACCTTACCAAGGCTTGACATACGCCGGAAACATCCAGAGATGGGTGCCCCCTTGTGGTCGGTGTACAGGTGGTGCATGGCTGTCGTCAGCTCGTGTCGTGAGATGTTGGGTTAAGTCCCGCAACGAGCGCAACCCTTGTTCTGTGTTGCCAGCATGCCTTTCGGGGTGATGGGGACTCACAGGAGACTGCCGGGGTCAACTCG
			765.127	119.102		2.68311	0.656718		4.39567e-05	0.000469212		Streptomycetales	Streptomyces	NA		ASV_9	GGTAGTCCACGCCGTAAACGGTGGGAACTAGGTGTTGGCGACATTCCACGTCGTCGGTGCCGCAGCTAACGCATTAAGTTCCCCGCCTGGGGAGTACGGCCGCAAGGCTAAAACTCAAAGGAATTGACGGGGGCCCGCACAAGCAGCGGAGCATGTGGCTTAATTCGACGCAACGCGAAGAACCTTACCAAGGCTTGACATACGCCGGAAAGCATCAGAGATGGTGCCCCCCTTGTGGTCGGTGTACAGGTGGTGCATGGCTGTCGTCAGCTCGTGTCGTGAGATGTTGGGTTAAGTCCCGCAACGAGCGCAACCCTTGTCCTGTGTTGCCAGCATGCCCTTCGGGGTGATGGGGACTCACAGGAGACCGCCGGGGTCAACTCG
			0.574604	51.1681		-24.2272	2.9037		7.21005e-17	1.83856e-15		Pseudomonadales	Pseudomonas	NA		ASV_474	GGTAGTCCACGCCGTAAACGATGTCAACTAGCCGTTGGAAGCCTTGAGCTTTTAGTGGCGCAGCTAACGCATTAAGTTGACCGCCTGGGGAGTACGGCCGCAAGGTTAAAACTCAAATGAATTGACGGGGGCCCGCACAAGCGGTGGAGCATGTGGTTTAATTCGAAGCAACGCGAAGAACCTTACCAGGCCTTGACATCCAATGAACTTTCCAGAGATGGATTGGTGCCTTCGGGAACATTGAGACAGGTGCTGCATGGCTGTCGTCAGCTCGTGTCGTGAGATGTTGGGTTAAGTCCCGTAACGAGCGCAACCCTTGTCCTTAGTTACCAGCACGTAATGGTGGGCACTCTAAGGAGACTGCCGGTGACAAACCG
			0	665.206		-25.4916	2.70023		3.70885e-21	1.13491e-19		Pseudomonadales	Pseudomonas	NA		ASV_42	GGTAGTCCACGCCGTAAACGATGTCAACTAGCCGTTGGAATCCTTGAGATTTTAGTGGCGCAGCTAACGCATTAAGTTGACCGCCTGGGGAGTACGGCCGCAAGGTTAAAACTCAAATGAATTGACGGGGGCCCGCACAAGCGGTGGAGCATGTGGTTTAATTCGAAGCAACGCGAAGAACCTTACCAGGCCTTGACATGCAGAGAACTTTCCAGAGATGGATTGGTGCCTTCGGGAACTCTGACACAGGTGCTGCATGGCTGTCGTCAGCTCGTGTCGTGAGATGTTGGGTTAAGTCCCGTAACGAGCGCAACCCTTGTCCTTAGTTACCAGCACGTTATGGTGGGCACTCTAAGGAGACTGCCGGTGACAAACCG
			243.576	52.86		2.20382	0.518637		2.14489e-05	0.000252437		Propionibacteriales	Cutibacterium	acnes		ASV_116	GGTAGTCCACGCTGTAAACGGTGGGTACTAGGTGTGGGGTCCATTCCACGGGTTCCGTGCCGTAGCTAACGCTTTAAGTACCCCGCCTGGGGAGTACGGCCGCAAGGCTAAAACTCAAAGGAATTGACGGGGCCCCGCACAAGCGGCGGAGCATGCGGATTAATTCGATGCAACGCGTAGAACCTTACCTGGGTTTGACATGGATCGGGAGTGCTCAGAGATGGGTGTGCCTCTTTTGGGGTCGGTTCACAGGTGGTGCATGGCTGTCGTCAGCTCGTGTCGTGAGATGTTGGGTTAAGTCCCGCAACGAGCGCAACCCTTGTTCACTGTTGCCAGCACGTTATGGTGGGGACTCAGTGGAGACCGCCGGGGTCAACTCG
			1.4455	147.686		-6.60789	0.648425		2.18256e-24	7.70612e-23		Oligoflexales	Silvanigrella	NA		ASV_181	GGTAGTCCACGCCGTAAACGATGATAACTAGGTGTTGGAAGAATTGACCCTTTCAGTACCGTAGCACACGCGCTAAGTTATCCGCCTGGGGAGTACGGCCGCAAGGCTAAAACTCAAAGGAATTGACGGGGGCCCGCACAAGAGGTGGAGTATGTGGTTTAATTCGAAGCAACGCGAAGAACCTTACCTAGGCTTGACATAGTGTGAAAAGCGCAGAGATGCGTAATAGTCGCAAGACACACATATACAGGTGCTGCATGGCTGTCGTCAGCTCGTGTCGTGAGATGTTGGGTTAAGTCCCGCAACGAGCGCAACCCTTTCCCTTATTTGCCATCATTAAGTTGGGAACTATAGGGGTACTGCCGATGATAAATCG
			0	28.9705		-7.15268	1.07322		2.65198e-11	5.29243e-10		Oligoflexales	NA	NA		ASV_589	GGTAGTCCACGCTGTAAACGATGGATACTAGGCTTGGTGGGTCTTGACCCCCGCCGAGCCGGAGCTAACGCACTAAGTATCCCGCCTGGGAAGTACGGTCGCAAGACTAAAACTCAAAGGAATTGACGGGGGCCCGCACAAGCAGTGGATCATGTGGTTTAATTCGAAGCAACGCGAAGAACCTTACCTGGATTTGACATCCGTTGACATCCGTAGAGATACGGCTTTTGGAGAAATCCAACAACGAGACAGGTGCTGCATGGCTGTCGTCAGCTCGTGGGGTGACCTGTTGGGTTAAGTCCCGCAACGAGCGCAACCCCTGTCCTTAGTTGCCATCATTAAGTTGGGCTCTCTAGGGAGACTGCCGTGGTTAACACG
			0	42.8378		-7.71686	0.883243		2.39469e-18	6.46565e-17		Oligoflexales	NA	NA		ASV_466	GGTAGTCCACGCTGTAAACGATGGGTACTAGGTTTGGAGGGTCTTGACCCCCCCCGAACCGCAGCTAACGCATTAAGTACCCCGCCTGGGAAGTACGGTCGCAAGACTAAAACTCAAAAGAATTGACGGGGGCCCGCACAAGCAGTGGATCATGTGGTTTAATTCGAAGCAACGCGCAGAACCTTACCTAGGTTTGACATCTCCTGACCGCTGGAGAAATCCAGTTTCTGTAGCAATACAGCAGGAAGACAGGTGCTGCATGGCTGTCGTCAGCTCGTGTGGTGACATGTTGGGTTAAGTCCCGCAACGAGCGCAACCCCTGTCCTTAGTTGCCAGCATTCAGTTGGGCTCTCTAAGGAGACTGCCGTGGTGAACACG
			0	15.8085		-24.052	2.18986		4.5946e-28	2.10892e-26		Oligoflexales	NA	NA		ASV_759	GGTAGTCCACGCTGTAAACGATGGGTACTAGGTTTGGTGGGTCTTGACCCCCGCCGAACCGGCGCTAACGCACTAAGTACCCCGCCTGGGAAGTACGGTCGCAAGACTAAAACTCAAAGGAATTGACGGGGGCCCGCACAAGCGGTGGATCATGTGGTTTAATTCGAAGCAACGCGAAGAACCTTACCTGGATTTGACATCTCCTGACAACCCTAGAGATAGGGCTTCTGTAGCAATACAGCAGGAAGACAGGTGCTGCATGGCTGTCGTCAGCTCGTGTGGTGACATGTTGGGTTAAGTCCCGCAACGAGCGCAACCCTTGTCCTTAGTTGCCAGCATTAAGTTGGGCTCTCTAAGGAGACTGCCGTGGTTAACACG
			0	18.8532		-6.53218	1.60265		4.58415e-05	0.000478211		Myxococcales	NA	NA		ASV_549	GGTAGTCCACGCCGTAAACGATGAGAACTAGGTGTCGTGGGAGTTGACCCCCGCGGTGCCGAAGCTAACGCATTAAGTTCTCCGCCTGGGAAGTACGGTCGCAAGACTAAAACTCAAAGGAATTGACGGGGGCCCGCACAAGCGGTGGAGCATGTGGTTTAATTCGACGCAACGCGCAGAACCTTACCTGGTCTTGACATCCTTGGAATCCTTCAGAGATGAGGGAGTGCCCGCAAGGGAACCAAGAGACAGGTGCTGCATGGCTGTCGTCAGCTCGTGTCGTGAGATGTTGGGTTAAGTCCCGCAACGAGCGCAACCCTCGCCTTTAGTTGCCACGCAAGTGGATCTCTAGAGGGACTGCCGGTGTTAAACCG
			31.8812	0.199466		7.26247	1.55595		3.04816e-06	4.23972e-05		Micrococcales	Promicromonospora	NA		ASV_579	GGTAGTCCATGCCGTAAACGTTGGGCACTAGGTGTGGGGCGGGTTCCACTCGTTCTGTGCCGCAGCTAACGCATTAAGTGCCCCGCCTGGGGAGTACGGCCGCAAGGCTAAAACTCAAAGGAATTGACGGGGGCCCGCACAAGCGGCGGAGCATGCGGATTAATTCGATGCAACGCGAAGAACCTTACCAAGGCTTGACATGTACGAGAACGCGTCAGAGATGACGAACTCTTTGGACACTCGTACACAGGTGGTGCATGGTTGTCGTCAGCTCGTGTCGTGAGATGTTGGGTTAAGTCCCGCAACGAGCGCAACCCCTATCCTATGTTGCCAGCGGGTCATGCCGGGGACTCATGGGAGACTGCCGGGGTCAACTCG
			0	23.659		-6.85977	1.57939		1.4036e-05	0.00016954		Gammaproteobacteria_Incertae_Sedis	Candidatus_Ovatusbacter	NA		ASV_700	GGTAGTCCATGCTGTAAACGATGAAGACTGGCTGTTGGGTGCCTTAGGGCACTTAGTAGCGAAGCTAACGCGTTAAGTCTTCCGCCTGGGGAGTACGGCCGCAAGGTTAAAACTCAAAGGAATTGACGGGGGCCCGCACAAGCGGTGGAGCATGTGGTTTAATTCGACGCAACGCGAAGAACCTTACCTACCCTTGACATCCTCGGGATCTGCTAGAGATAGTGGAGTGCCTTCGGGAACCGAGAGACAGGTGCTGCATGGCTGTCGTCAGCTCGTGTCGTGAGATGTTGGGTTAAGTCCCGTAACGAGCGCAACCCTTGTCCTTAGTTGCCATCAGGTAAAGCTGGGAACTCTAAGGAGACTGCCGGTGACAAGCCG
			0	99.8766		-8.93761	0.830931		5.54421e-27	2.31345e-25		Gammaproteobacteria_Incertae_Sedis	Candidatus_Ovatusbacter	NA		ASV_256	GGTAGTCCATGCTGTAAACGATGAAGACTGGCTGTTGGGTGCCTTAGGGCACTTAGTAGCGAAGCTAACGCGTTAAGTCTTCCGCCTGGGGAGTACGGCCGCAAGGTTAAAACTCAAAGGAATTGACGGGGGCCCGCACAAGCGGTGGAGCATGTGGTTTAATTCGACGCAACGCGAAGAACCTTACCTACCCTTGACATCCTCGGAATCTGCTAGAGATAGTGGAGTGCCTTCGGGAACCGAGAGACAGGTGCTGCATGGCTGTCGTCAGCTCGTGTCGTGAGATGTTGGGTTAAGTCCCGTAACGAGCGCAACCCTTGTCCTTAGTTGCCATCAGGTAAAGCTGGGAACTCTAAGGAGACTGCCGGTGACAAGCCG
			5.51796	75.9212		-3.79719	0.967998		8.75555e-05	0.000873652		Flavobacteriales	Flavobacterium	NA		ASV_30	GGTAGTCCACGCCGTAAACGATGGATACTAGCTGTTGGGAGCAATCTCAGTGGCTAAGCGAAAGTGATAAGTATCCCACCTGGGGAGTACGTTCGCAAGAATGAAACTCAAAGGAATTGACGGGGGCCCGCACAAGCGGTGGAGCATGTGGTTTAATTCGATGATACGCGAGGAACCTTACCAAGGCTTAAATGTAGATTGACCGGTTTGGAAACAGATCTTTCGCAAGACAATTTACAAGGTGCTGCATGGTTGTCGTCAGCTCGTGCCGTGAGGTGTCAGGTTAAGTCCTATAACGAGCGCAACCCCTGTTGTTAGTTGCCAGCGAGTCAAGTCGGGAACTCTAACAAGACTGCCAGTGCAAACTGT
			2.9605	77.4815		-6.21387	0.852674		3.15741e-13	6.58751e-12		Diplorickettsiales	NA	NA		ASV_380	GGTAGTCCACGCTGTAAACGATGAGAACTAGATGTTAGGGAGCATGACTTTCTAGTATCGAAGCTAACGCGATAAGTTCTCCGCCTGGGGAGTACGGCCGCAAGGTTAAAACTCAAAGGAATTGACGGGGGCCCGCACAAGCGGTGGAGCATGTGGTTTAATTCGATGCAACGCGAAGAACCTTACCTACCCTTGACATCCTAGGGATCTTGCAGAGATGCGGGAGTGCCGAAAGGAACCTAGAGACAGGTGCTGCATGGCTGTCGTCAGCTCGTGTTGTGAGATGTTGGGTTAAGTCCCGTAACGAGCGCAACCCTTATCCTTAGTTGCCAACGCGTAATGGCGGGGACTCTAAGGAGACTGCTGGTGATGAACCG
			0.0710131	428.578		-10.7505	0.44794		2.78742e-127	1.27943e-124		Diplorickettsiales	NA	NA		ASV_52	GGTAGTCCACGCTGTAAACGATGAGAACTAGATGTTAGGGAGCATGACTCTCTAGTATCGAAGCTAACGCGATAAGTTCTCCGCCTGGGGAGTACGGCCGCAAGGTTAAAACTCAAAGGAATTGACGGGGGCCCGCACAAGCGGTGGAGCATGTGGTTTAATTCGATGCAACGCGAAGAACCTTACCTACCCTTGACATCCTAGGGATCCTGCAGAGATGCGGGAGTGCCGAAAGGAACCTAGAGACAGGTGCTGCATGGCTGTCGTCAGCTCGTGTTGTGAGATGTTGGGTTAAGTCCCGTAACGAGCGCAACCCTTATCCTTAGTTGCCAGCGCGTAATGGCGGGGACTCTAAGGAGACTGCTGGTGATGAACCG
			34.3134	0.35124		6.35704	1.14081		2.51293e-08	4.61373e-07		Corynebacteriales	Nocardia	NA		ASV_642	GGTAGTCCACGCCGTAAACGGTGGGTACTAGGTGTGGGTTTCCTTCCACGGGATCCGTGCCGTAGCTAACGCATTAAGTACCCCGCCTGGGGAGTACGGCCGCAAGGCTAAAACTCAAAGGAATTGACGGGGGCCCGCACAAGCGGCGGAGCATGTGGATTAATTCGATGCAACGCGAAGAACCTTACCTGGGTTTGACATACACCAGAAAGCTATAGAGATATAGCCCCCCTTGTGGTTGGTGTACAGGTGGTGCATGGCTGTCGTCAGCTCGTGTCGTGAGATGTTGGGTTAAGTCCCGCAACGAGCGCAACCCTTATCTTATGTTGCCAGCGCGTTATGGCGGGGACTCGTGAGAGACTGCCGGGGTCAACTCG
			48.2398	1.12669		5.39885	1.05707		3.26671e-07	4.68569e-06		Corynebacteriales	Nocardia	NA		ASV_501	GGTAGTCCATGCCGTAAACGGTGGGTACTAGGTGTGGGTTTCCTTCCACGGGATCCGTGCCGTAGCTAACGCATTAAGTACCCCGCCTGGGGAGTACGGCCGCAAGGCTAAAACTCAAAGGAATTGACGGGGGCCCGCACAAGCGGCGGAGCATGTGGATTAATTCGATGCAACGCGAAGAACCTTACCTGGGTTTGACATACACCGGAAACCTGCAGAGATGTAGGCCCCCTTGTGGTCGGTGTACAGGTGGTGCATGGCTGTCGTCAGCTCGTGTCGTGAGATGTTGGGTTAAGTCCCGCAACGAGCGCAACCCTTATCTTATGTTGCCAGCGCGTAATGGCGGGGACTCGTGAGAGACTGCCGGGGTCAACTCG
			111.412	7.28264		3.93267	0.861734		5.02658e-06	6.59201e-05		Corynebacteriales	Nocardia	vinacea		ASV_265	GGTAGTCCACGCCGTAAACGGTGGGTACTAGGTGTGGGTTTCCTTCCACGGGATCCGTGCCGTAGCTAACGCATTAAGTACCCCGCCTGGGGAGTACGGCCGCAAGGCTAAAACTCAAAGGAATTGACGGGGGCCCGCACAAGCGGCGGAGCATGTGGATTAATTCGATGCAACGCGAAGAACCTTACCTGGGTTTGACATACACCAGAAAGCGGCAGAGATGTCGCCCCCCTTGTGGTTGGTGTACAGGTGGTGCATGGCTGTCGTCAGCTCGTGTCGTGAGATGTTGGGTTAAGTCCCGCAACGAGCGCAACCCTTATCTTATGTTGCCAGCGCGTTATGGCGGGGACTCGTGAGAGACTGCCGGGGTCAACTCG
			127.657	16.6095		2.9406	0.696446		2.41823e-05	0.000277492		Corynebacteriales	Lawsonella	NA		ASV_231	GGTAGTCCATGCCGTAAACGGTGGGCGCTAGGTGTGGGGTTCCTTCCACGGGCTCCGCGCCGTAGCTAACGCATTAAGCGCCCCGCCTGGGGAGTACGGCCGCAAGGCTAAAACTCAAAGAAATTGACGGGGGCCCGCACAAGCGGCGGAGCATGTGGATTAATTCGATGCAACGCGAAGAACCTTACCTGGGCTTGACATATAGAGGATCGCTACAGAGATGTGGTTTCCCTTGTGGCTTCTATACAGGTGGTGCATGGTTGTCGTCAGCTCGTGTCGTGAGATGTTGGGTTAAGTCCCGCAACGAGCGCAACCCTTGTCTTATGTTGCCAGCACGTTATGGTGGGGACTCGTGAGAGACTGCCGGGGTCAACTCG
			3.18266	76.3825		-4.59432	1.11659		3.87842e-05	0.000423856		Corynebacteriales	Rhodococcus	NA		ASV_333	GGTAGTCCACGCCGTAAACGGTGGGCGCTAGGTGTGGGTTCCTTCCACGGGATCTGTGCCGTAGCTAACGCATTAAGCGCCCCGCCTGGGGAGTACGGCCGCAAGGCTAAAACTCAAAGGAATTGACGGGGGCCCGCACAAGCGGCGGAGCATGTGGATTAATTCGATGCAACGCGAAGAACCTTACCTGGGTTTGACATACACCGGAAAACCGTAGAGATACGGTCCCCCTTGTGGTCGGTGTACAGGTGGTGCATGGCTGTCGTCAGCTCGTGTCGTGAGATGTTGGGTTAAGTCCCGCAACGAGCGCAACCCTTGTCTTATGTTGCCAGCGCGTTATGGCGGGGACTCGTAAGAGACTGCCGGGGTCAACTCG
			0.21692	25.1976		-6.80144	1.72688		8.19652e-05	0.000836045		Clostridiales	Lachnoclostridium_5	NA		ASV_50	GGTAGTCCACGCCGTAAACGATGAATACTAGGTGTCGGGGAGCAAAGCTCTTCGGTGCCGTCGCTAACGCAATAAGTATTCCACCTGGGGAGTACGTTCGCAAGAATGAAACTCAAAGGAATTGACGGGGACCCGCACAAGCGGTGGAGCATGTGGTTTAATTCGAAGCAACGCGAAGAACCTTACCAAGTCTTGACATCGGAATGACAGCCTTATAACTAAGGTCTCCCTACGGGGCATTCTAGACAGGTGGTGCATGGTTGTCGTCAGCTCGTGTCGTGAGATGTTGGGTTAAGTCCCGCAACGAGCGCAACCCTTATCCTTAGTAGCCAGCAGTTCGGCTGGGCACTCTGGGGAGACTGCCAGGGATAACCTG
			0	37.8366		-7.53857	0.70996		2.44961e-26	9.36978e-25		Chlamydiales	Candidatus_Protochlamydia	NA		ASV_505	GGTAGTCCTTGCTGTAAACGATGTATACTTGGTGTAACTGGACTCAACCCCAGTTGTGCCGTAGCTAACGCGTTAAGTATACCGCCTGGGGAGTACAGTCGCAAGGCTGAAACTCAAAAGAATTGACGGGGACCCGCACAAGCAGTGGAGCATGTGGTTTAATTCGATGCAACGCGAAGAACCTTACCCAGACTTGACATGTAGTAGACCGTTTCAGAGATGAGACTTTCCTTAGGGACTGCTACACAGGTGCTGCATGGCTGTCGTCAGCTCGTGCCGTGAGGTGTTGGGTTAAGTCCCGCAACGAGCGCAACCCTTATCATTAGTTGCCAACATTTAAGGTGGGAACTCTAATGAGACTGCCTGGGTTAACCAG
			6.65149	120.741		-4.18736	0.755363		2.9647e-08	5.23384e-07		Betaproteobacteriales	Methylotenera	versatilis		ASV_48	GGTAGTCCACGCCCTAAACGATGTCTACTAGTTGTTGGTGGAGTAAAATCCATGAGTAACGCAGCTAACGCGTGAAGTAGACCGCCTGGGGAGTACGGTCGCAAGATTAAAACTCAAATGAATTGACGGGGGCCCGCACAAGCGGTGGATTATGTGGATTAATTCGATGCAACGCGAAAAACCTTACCTGGCCTTGACATGTAACGAACTTTCCAGAGATGGATTGGTGCTCGAAAGAGAACGTTAACACAGGTGCTGCATGGCTGTCGTCAGCTCGTGTCGTGAGATGTTGGGTTAAGTCCCGCAACGAGCGCAACCCTTGCCATTAATTGCCATCATTTAGTTGGGCACTTTAATGGGACTGCCGGTGACAAACCG
			2.4675	55.7979		-6.07232	1.13362		8.48115e-08	1.29762e-06		Betaproteobacteriales	Leptothrix	NA		ASV_171	GGTAGTCCACGCCCTAAACGATGTCAACTGGTTGTTGGGAAGGTTCCTTCTCAGTAACGTAGCTAACGCGTGAAGTTGACCGCCTGGGGAGTACGGCCGCAAGGTTGAAACTCAAAGGAATTGACGGGGACCCGCACAAGCGGTGGATGATGTGGTTTAATTCGATGCAACGCGAAAAACCTTACCTACCCTTGACATGTCTAGAATTTTGCAGAGATGTGAAAGTGCTCGAAAGAGAACTAGAACACAGGTGCTGCATGGCCGTCGTCAGCTCGTGTCGTGAGATGTTGGGTTAAGTCCCGCAACGAGCGCAACCCTTGTCATTAGTTGCTACGAAAGGGCACTCTAATGAGACTGCCGGTGACAAACCG
			0	17.0719		-6.38931	1.4565		1.1506e-05	0.000142736		Betaproteobacteriales	Massilia	NA		ASV_238	GGTAGTCCACGCCCTAAACGATGTCTACTAGTTGTCGGGTTTTAATTAACTTGGTAACGCAGCTAACGCGTGAAGTAGACCGCCTGGGGAGTACGGTCGCAAGATTAAAACTCAAAGGAATTGACGGGGACCCGCACAAGCGGTGGATGATGTGGATTAATTCGATGCAACGCGAAAAACCTTACCTACCCTTGACATGTACGGAAGCCACGAGAGATCGAGGTGTGCTCGAAAGAGAGCCGTAACACAGGTGCTGCATGGCTGTCGTCAGCTCGTGTCGTGAGATGTTGGGTTAAGTCCCGCAACGAGCGCAACCCTTGTCATTAGTTGCTACGAAAGGGCACTCTAATGAGACTGCCGGTGACAAACCG
			0	15.0686		-23.9572	2.42016		4.20343e-23	1.37813e-21		Betaproteobacteriales	Massilia	NA		ASV_41	GGTAGTCCACGCCCTAAACGATGTCTACTAGTTGTCGGGTCTTAATTGACTTGGTAACGCAGCTAACGCGTGAAGTAGACCGCCTGGGGAGTACGGTCGCAAGATTAAAACTCAAAGGAATTGACGGGGACCCGCACAAGCGGTGGATGATGTGGATTAATTCGATGCAACGCGAAAAACCTTACCTACCCTTGACATGTCAGGAACCTCCGAGAGATTGGAGGGTGCCCGAAAGGGAGCCTGAACACAGGTGCTGCATGGCTGTCGTCAGCTCGTGTCGTGAGATGTTGGGTTAAGTCCCGCAACGAGCGCAACCCTTGTCATTAGTTGCTACGAAAGGGCACTCTAATGAGACTGCCGGTGACAAACCG
			0	492.574		-27.8115	1.21577		8.14555e-116	1.8694e-113		Betaproteobacteriales	Actimicrobium	NA		ASV_27	GGTAGTCCACGCCCTAAACGATGTCTACTAGTTGTCGGGTCTTAATTGACTTGGTAACGCAGCTAACGCGTGAAGTAGACCGCCTGGGGAGTACGGTCGCAAGATTAAAACTCAAAGGAATTGACGGGGACCCGCACAAGCGGTGGATGATGTGGATTAATTCGATGCAACGCGAAAAACCTTACCTACCCTTGACATGGTCGGAATTCTGCCGAGAGGCGGAAGTGCTCGAAAGAGAGCCGATACACAGGTGCTGCATGGCTGTCGTCAGCTCGTGTCGTGAGATGTTGGGTTAAGTCCCGCAACGAGCGCAACCCTTGTCATTAGTTGCTACGAAAGGGCACTCTAATGAGACTGCCGGTGACAAACCG
			230.441	0		27.2618	1.8399		1.13785e-49	8.70459e-48		Bacillales	Bacillus	NA		ASV_4	GGTAGTCCACGCCGTAAACGATGAGTGCTAAGTGTTAGGGGGTTTCCGCCCCTTAGTGCTGCAGCTAACGCATTAAGCACTCCGCCTGGGGAGTACGGTCGCAAGACTGAAACTCAAAGGAATTGACGGGGGCCCGCACAAGCGGTGGAGCATGTGGTTTAATTCGAAGCAACGCGAAGAACCTTACCAGGTCTTGACATCCTCTGACAATCCTAGAGATAGGACGTCCCCTTCGGGGGCAGAGTGACAGGTGGTGCATGGTTGTCGTCAGCTCGTGTCGTGAGATGTTGGGTTAAGTCCCGCAACGAGCGCAACCCTTGATCTTAGTTGCCAGCATTCAGTTGGGCACTCTAAGGTGACTGCCGGTGACAAACCG
			503.617	1027.03		-1.02875	0.189541		5.71166e-08	9.04018e-07		Bacillales	Bacillus	NA		ASV_12	GGTAGTCCACGCTGTAAACGATGAGTGCTAAGTGTTAGAGGGTTTCCGCCCTTTAGTGCTGCAGCTAACGCATTAAGCACTCCGCCTGGGGAGTACGGCCGCAAGGCTGAAACTCAAAGGAATTGACGGGGACCCGCACAAGCGGTGGAGCATGTGGTTTAATTCGAAGCAACGCGAAGAACCTTACCAGGTCTTGACATCCTCTGACACTCCTAGAGATAGGACGTTCCCCTTCGGGGGACAGAGTGACAGGTGGTGCATGGTTGTCGTCAGCTCGTGTCGTGAGATGTTGGGTTAAGTCCCGCAACGAGCGCAACCCTTGATCTTAGTTGCCAGCATTCAGTTGGGCACTCTAAGGTGACTGCCGGTGACAAACCG
			279.455	1210.94		-2.11649	0.265348		1.50803e-15	3.29612e-14		Bacillales	Paenibacillus	pectinilyticus		ASV_15	GGTAGTCCACGCCGTAAACGATGCATACTAGGTGTCGGGGATTCGATTTCTCGGTGCCGAAGTTAACACAGTAAGTATGCCGCCTGGGGAGTACGCTCGCAAGAGTGAAACTCAAAGGAATTGACGGGGACCCGCACAAGCAGTGGAGTATGTGGTTTAATTCGAAGCAACGCGAAGAACCTTACCAGGTCTTGACATCCCTCTGACCGTCCTAGAGATAGGGCTTCCCTTCGGGGCAGAGGAGACAGGTGGTGCATGGTTGTCGTCAGCTCGTGTCGTGAGATGTTGGGTTAAGTCCCGCAACGAGCGCAACCCTTGATCTTAGTTGCCAGCACTTCGGGTGGGCACTCTAGGATGACTGCCGGTGACAAACCG
			41.3014	201.094		-2.28394	0.418829		4.94867e-08	8.11228e-07		Bacillales	Paenibacillus	NA		ASV_132	GGTAGTCCACGCCGTAAACGATGCATACTAGGTGTCAGGGGTTTCGATGCCCTTGGTGCCGAAGTTAACACAGTAAGTATGCCGCCTGGGGAGTACGCTCGCAAGAGTGAAACTCAAAGGAATTGACGGGGACCCGCACAAGCAGTGGAGTATGTGGTTTAATTCGAAGCAACGCGAAGAACCTTACCAGGTCTTGACATCCCTCTGAATCCTCTAGAGATAGAGGCGACCTTCGGGACAGAGGAGACAGGTGGTGCATGGTTGTCGTCAGCTCGTGTCGTGAGATGTTGGGTTAAGTCCCGCAACGAGCGCAACCCTTGATCTTAGTTGCCAGCACTTCGGGTGGGCACTCTAGGATGACTGCCGGTGACAAACCG
			199.918	1019.92		-2.3513	0.288626		3.74522e-16	8.59529e-15		Bacillales	Paenibacillus	pectinilyticus		ASV_18	GGTAGTCCACGCCGTAAACGATGCATACTAGGTGTCGGGGATTCGATTTCTCGGTGCCGAAGTTAACACAGTAAGTATGCCGCCTGGGGAGTACGCTCGCAAGAGTGAAACTCAAAGGAATTGACGGGGACCCGCACAAGCAGTGGAGTATGTGGTTTAATTCGAAGCAACGCGAAGAACCTTACCAGGTCTTGACATCCCTCTGAATCCTCTAGAGATAGAGGCGACCTTCGGGACAGAGGAGACAGGTGGTGCATGGTTGTCGTCAGCTCGTGTCGTGAGATGTTGGGTTAAGTCCCGCAACGAGCGCAACCCTTGATCTTAGTTGCCAGCACTTCGGGTGGGCACTCTAGGATGACTGCCGGTGACAAACCG
			59.9671	387.986		-2.69394	0.589365		4.8558e-06	6.55533e-05		Bacillales	Paenibacillus	NA		ASV_60	GGTAGTCCACGCCGTAAACGATGCATACTAGGTGTCGGGGATTCGATTTCTCGGTGCCGAAGTTAACACAGTAAGTATGCCGCCTGGGGAGTACGCTCGCAAGAGTGAAACTCAAAGGAATTGACGGGGACCCGCACAAGCAGTGGAGTATGTGGTTTAATTCGAAGCAACGCGAAGAACCTTACCAGGTCTTGACATCCCTCTGACCGTCCTAGAGATAGGGCTTCCCTTCGGGGCAGAGGAGACAGGTGGTGCATGGTTGTCGTCAGCTCGTGTCGTGAGATGTTGGGTTAAGTCCCGCAACGAGCGCAACCCTTGATCTTAGTTGCCAGCACTTCGGGTGGGCACTCTAAGATGACTGCCGGTGACAAACCG
			11.3944	125.093		-3.45169	0.528593		6.5782e-11	1.25808e-09		Bacillales	NA	NA		ASV_239	GGTAGTCCACGCTGTAAACGATGAGTGCTAGGTGTTAGGGGGGTCCAACCCCTTAGTGCTGAAGTTAACACATTAAGCACTCCGCCTGGGGAGTACGACCGCAAGGTTGAAACTCAAAGGAATTGACGGGGGCCCGCACAAGCAGTGGAGCATGTGGTTTAATTCGAAGCAACGCGAAGAACCTTACCAGGTCTTGACATCCTCTGACAAGGCTAGAGATAGCCCGTTCCCCTTCGGGGGACAGAGTGACAGGTGGTGCATGGTTGTCGTCAGCTCGTGTCGTGAGATGTTGGGTTAAGTCCCGCAACGAGCGCAACCCTTGATCTTAGTTGCCAGCATTCAGTTGGGCACTCTAAGGTGACTGCCGGTGATAAACCG
			6.18785	79.6168		-3.67585	0.671875		4.4744e-08	7.60648e-07		Bacillales	Paenibacillus	NA		ASV_325	GGTAGTCCACGCCGTAAACGATGCATACTAGGTGTCAGGGGTTTCGATGCCCTTGGTGCCGAAGTTAACACAGTAAGTATGCCGCCTGGGGAGTACGCTCGCAAGAGTGAAACTCAAAGGAATTGACGGGGACCCGCACAAGCAGTGGAGTATGTGGTTTAATTCGAAGCAACGCGAAGAACCTTACCAGGTCTTGACATCCCTCTGACCGTCCTAGAGATAGGGCTTCCCTTCGGGGCAGAGGAGACAGGTGGTGCATGGTTGTCGTCAGCTCGTGTCGTGAGATGTTGGGTTAAGTCCCGCAACGAGCGCAACCCTTGATCTTAGTTGCCAGCACTTCGGGTGGGCACTCTAGGATGACTGCCGGTGACAAACCG
			6.81485	144.857		-4.4	1.05132		2.84899e-05	0.000318947		Bacillales	Paenibacillus	NA		ASV_186	GGTAGTCCACGCCGTAAACGATGCATACTAGGTGTCGGGGATTCGATTTCTCGGTGCCGAAGTTAACACAGTAAGTATGCCGCCTGGGGAGTACGCTCGCAAGAGTGAAACTCAAAGGAATTGACGGGGACCCGCACAAGCAGTGGAGTATGTGGTTTAATTCGAAGCAACGCGAAGAACCTTACCAGGTCTTGACATCCCTCTGACCGTCCTAGAGATAGGGCTTCCCTTCGGGGCAGAGGAGACAGGTGGTGCATGGTTGTCGTCAGCTCGTGTCGTGAGATGTTGGGTTAAGTCCCGCAACGAGCGCAACCCTTGATCTTAGTTGCCAGCACTTTGGGTGGGCACTCTAGGATGACTGCCGGTGACAAACCG
			0.477324	216.817		-9.10356	0.804714		1.13439e-29	5.78539e-28		Bacillales	Tumebacillus	NA		ASV_143	GGTAGTCCACGCCGTAAACGATGAGTGCTAGGTGTTGGGGGGTACCACCCTCAGTGCCGAAGCTAACGCATTAAGCACTCCGCCTGGGGAGTACGGTCGCAAGACTGAAACTCAAAGGAATTGACGGGGGCCCGCACAAGCAGTGGAGCATGTGGTTTAATTCGAAGCAACGCGAAGAACCTTACCAAGACTTGACATCCCGCTGACCGCTCTAGAGATAGAGTTTCCCTTCGGGGCAGCGGTGACAGGTGGTGCATGGTTGTCGTCAGCTCGTGTCGTGAGATGTTGGGTTAAGTCCCGCAACGAGCGCAACCCTTACGTTGTGTTGCCATCATTAGGTTGGGCACTCACAATGGACTGCCGGTGACAAACCG
			0	444.864		-11.0922	0.555027		7.43332e-89	1.1373e-86		Bacillales	Paenibacillus	pectinilyticus		ASV_64	GGTAGTCCACGCCGTAAACGATGCATACTAGGTGTCGGGGATTCGATTTCTCGGTGCCGAAGTTAACACAGTAAGTATGCCGCCTGGGGAGTACGCTCGCAAGAGTGAAACTCAAAGGAATTGACGGGGACCCGCACAAGCAGTGGAGTATGTGGTTTAATTCGAAGCAACGCGAAGAACCTTACCAGGTCTTGACATCCCTCTGAATCCTCTAGAGATAGAGGCGGCCTTCGGGACAGAGGAGACAGGTGGTGCATGGTTGTCGTCAGCTCGTGTCGTGAGATGTTGGGTTAAGTCCCGCAACGAGCGCAACCCTTGATCTTAGTTGCCAGCACTTCGGGTGGGCACTCTAGGATGACTGCCGGTGACAAACCG
			0	40.4217		-24.0318	1.80317		1.60147e-40	9.18843e-39		Bacillales	Tumebacillus	NA		ASV_558	GGTAGTCCACGCCGTAAACGATGAGTGCTAGGTGTTGGGGGGTACCACCCTCAGTGCCGAAGCTAACGCATTAAGCACTCCGCCTGGGGAGTACGGTCGCAAGACTGAAACTCAAAGGAATTGACGGGGGCCCGCACAAGCAGTGGAGCATGTGGTTTAATTCGAAGCAACGCGAAGAACCTTACCAAGACTTGACATCCCGCTGACCGCTCTAGAGATAGAGTTTCCCTTCGGGGCAGCGGTGACAGGTGGTGCATGGTTGTCGTCAGCTCGTGTCGTGAGATGTTGGGTTAAGTCCCGCAACGAGCGCAACCCTTACATTGTGTTGCCATCATTAGGTTGGGCACTCACAATGGACTGCCGGTGACAAACCG
			0	15.6436		-24.0353	2.74168		1.84092e-18	5.28115e-17		Bacillales	Paenibacillus	NA		ASV_921	GGTAGTCCACGCCGTAAACGATGCATACTAGGTGTCGGGGATTCGATTCCTCGGTGCCGAAGTTAACACAGTAAGTATGCCGCCTGGGGAGTACGCTCGCAAGAGTGAAACTCAAAGGAATTGACGGGGACCCGCACAAGCAGTGGAGTATGTGGTTTAATTCGAAGCAACGCGAAGAACCTTACCAGGTCTTGACATCCCGATGTAACACCTAGAGATAGGTGCCCTCTTCGGAGCATTGGAGACAGGTGGTGCATGGTTGTCGTCAGCTCGTGTCGTGAGATGTTGGGTTAAGTCCCGCAACGAGCGCAACCCTTGATCTTAGTTGCCAGCATGTTATGGTGGGCACTCTAAGATGACTGCCGGTGACAAACCG
			0	22.7791		-24.1926	1.58929		2.51698e-52	2.88823e-50		Bacillales	Tumebacillus	NA		ASV_762	GGTAGTCCACGCCGTAAACGATGAGTGCTAGGTGTTGGGGGGTACCACCCTCAGTGCCGAAGCTAACGCATTAAGCACTCCGCCTGGGGAGTACGGTCGCAAGACTGAAACTCAAAGGAATTGACGGGGGCCCGCACAAGCAGTGGAGCATGTGGTTTAATTCGAAGCAACGCGAAGAACCTTACCAAGACTTGACATCCCGCTGACCGCTCTAGAGATAGAGTTTCCCTTCGGGGCAGCGGTGACAGGTGGTGCATGGTTGTCGTCAGCTCGTGTCGTGAGATGTTGGGTTAAGTCCCGCAACGAGCGCAACCCTTACATTGTGTTGCCATCATTTGGTTGGGCACTCACAATGGACTGCCGGTGACAAACCG
			0	32.2898		-25.0218	1.77505		3.99911e-45	2.62228e-43		Bacillales	NA	NA		ASV_657	GGTAGTCCACGCTGTAAACGATGAGTGCTAGGTGTTAGGGGGGTCCAACCCCTTAGTGCTGAAGTTAACACATTAAGCACTCCGCCTGGGGAGTACGACCGCAAGGTTGAAACTCAAAGGAATTGACGGGGGCCCGCACAAGCAGTGGAGCATGTGGTTTAATTCGAAGCAACGCGAAGAACCTTACCAGGTCTTGACATCCTCTGACAAGGCAAGAGATTGCCCGTTCCCCTTCGGGGGACAGAGTGACAGGTGGTGCATGGTTGTCGTCAGCTCGTGTCGTGAGATGTTGGGTTAAGTCCCGCAACGAGCGCAACCCTTGATCTTAGTTGCCAGCATTCAGTTGGGCACTCTAAGGTGACTGCCGGTGATAAACCG
			0	9.10864		-5.4825	1.24655		1.09188e-05	0.000139214		NA	NA	NA		ASV_1353	GGTAGTTCATACTGTAAACGATGAATATTAAATATCAAGAAAAACCTTGGTGTTACAGCTAACGCATTAAATATTCTACCGGGGGACTACATTCGCAAGAATGAAACTTAAAAAAATAGGCGGCCATTTTTTACAAGCTGTGGAGCATGTTATTTAATTAGATACAACACTAAAAATCTTACCAGTCCTAAAATAGTACATACTAAAACATAAATTTGTTAGAAAGACGTTTATGTCACTTTTATAAAATAATTTTATTTTATAATTGTTTTTGTACTTAGGTATTGCATGGCTATCGTCAGTTCGTGTCGTAAGATTATGGTTAATTCCAGGTCACGAGCGCAACCCCCATTTTTAATTACTAAGGTGTAATAACCAAGAACATTAAAAAAACAGCAT…
rhizo	16S, bacteria		101.791	0.827985		6.86206	0.779557		1.33781e-18	6.15926e-17		Xanthomonadales	Frateuria	NA		ASV_290	GGTAGTCCACGCCCTAAACGATGCGAACTGGATGTTGGTCTCAACTCGGAGATCAGTGTCGAAGCTAACGCGTTAAGTTCGCCGCCTGGGGAGTACGGTCGCAAGACTGAAACTCAAAGGAATTGACGGGGGCCCGCACAAGCGGTGGAGTATGTGGTTTAATTCGATGCAACGCGAAGAACCTTACCTGGCCTTGACATGTCTGGAATCCTTGAGAGATCGAGGAGTGCCTTCGGGAATCAGAACACAGGTGCTGCATGGCTGTCGTCAGCTCGTGTCGTGAGATGTTGGGTTAAGTCCCGCAACGAGCGCAACCCTTGTCCTTAGTTGCCAGCACGTAATGGTGGGAACTCTAAGGAGACTGCCGGTGACAAACCG
			63.723	2.11691		4.90278	0.951128		2.54037e-07	4.71608e-06		Xanthomonadales	NA	NA		ASV_407	GGTAGTCCACGCCCTAAACGATGCGAACTGGATGTTGGTCTCAACTCGGAGATCAGTGTCGAAGCTAACGCGTTAAGTTCGCCGCCTGGGGAGTACGGTCGCAAGACTGAAACTCAAAGGAATTGACGGGGGCCCGCACAAGCGGTGGAGTATGTGGTTTAATTCGATGCAACGCGAAGAACCTTACCTGGCCTTGACATGTCCGGAATCCAGCAGAGATGCAGGAGTGCCTTCGGGAATCGGAACACAGGTGCTGCATGGCTGTCGTCAGCTCGTGTCGTGAGATGTTGGGTTAAGTCCCGCAACGAGCGCAACCCTTGTCCTTAGTTGCCAGCACGTAATGGTGGGAACTCTAAGGAGACTGCCGGTGACAAACCG
			207.326	61.9759		1.74226	0.302941		8.86369e-09	1.88928e-07		Xanthomonadales	NA	NA		ASV_131	GGTAGTCCACGCCCTAAACGATGCGAACTGGATGTTGGGAGCAACTAGGCTCTCAGTATCGAAGCTAACGCGTTAAGTTCGCCGCCTGGGGAGTACGGTCGCAAGACTGAAACTCAAAGGAATTGACGGGGGCCCGCACAAGCGGTGGAGTATGTGGTTTAATTCGATGCAACGCGCAGAACCTTACCTGGCCTTGACATCCACGGAACCCTTGAGAGATCGAGGGGTGCCTTCGGGAACCGTGAGACAGGTGCTGCATGGCTGTCGTCAGCTCGTGTCGTGAGATGTTGGGTTAAGTCCCGCAACGAGCGCAACCCTTGTCCTTAGTTGCCAGCACGTAATGGTGGGAACTCTAAGGAGACCGCCGGTGACAAACCG
			296.98	90.9124		1.70724	0.161588		4.31299e-26	3.3095e-24		Xanthomonadales	NA	NA		ASV_83	GGTAGTCCACGCCCTAAACGATGCGAACTGGATGTTGGGAGCAACTAGGCTCTCAGTATCGAAGCTAACGCGTTAAGTTCGCCGCCTGGGGAGTACGGTCGCAAGACTGAAACTCAAAGGAATTGACGGGGGCCCGCACAAGCGGTGGAGTATGTGGTTTAATTCGATGCAACGCGCAGAACCTTACCTGGCCTTGACATCCACGGAATCCTTTAGAGATAGAGGAGTGCCTTCGGGAACCGTGAGACAGGTGCTGCATGGCTGTCGTCAGCTCGTGTCGTGAGATGTTGGGTTAAGTCCCGCAACGAGCGCAACCCTTGTCCTTAGTTGCCAGCACGTAATGGTGGGAACTCTAAGGAGACCGCCGGTGACAAACCG
			125.374	62.588		1.00169	0.207988		1.46397e-06	2.40719e-05		Xanthomonadales	NA	NA		ASV_163	GGTAGTCCACGCCCTAAACGATGCGAACTGGATGTTGGTCTCAACTCGGAGATCAGTGTCGAAGCTAACGCGTTAAGTTCGCCGCCTGGGGAGTACGGTCGCAAGACTGAAACTCAAAGGAATTGACGGGGGCCCGCACAAGCGGTGGAGTATGTGGTTTAATTCGATGCAACGCGAAGAACCTTACCTGGCCTTGACATGTCCGGAATCCTGCAGAGATGCGGGAGTGCCTTCGGGAATCGGAACACAGGTGCTGCATGGCTGTCGTCAGCTCGTGTCGTGAGATGTTGGGTTAAGTCCCGCAACGAGCGCAACCCTTGTCCTTAGTTGCCAGCACGTAATGGTGGGAACTCTAAGGAGACTGCCGGTGACAAACCG
			361.923	217.805		0.732368	0.157915		3.52253e-06	5.33478e-05		Xanthomonadales	Luteimonas	NA		ASV_49	GGTAGTCCACGCCCTAAACGATGCGAACTGGATGTTGGGAGCAATTAGGCTCTCAGTATCGAAGCTAACGCGTTAAGTTCGCCGCCTGGGGAGTACGGTCGCAAGACTGAAACTCAAAGGAATTGACGGGGGCCCGCACAAGCGGTGGAGTATGTGGTTTAATTCGATGCAACGCGAAGAACCTTACCTGGCCTTGACATCCACGGAACTTACCAGAGATGGTTTGGTGCCTTCGGGAACCGTGAGACAGGTGCTGCATGGCTGTCGTCAGCTCGTGTCGTGAGATGTTGGGTTAAGTCCCGCAACGAGCGCAACCCTTGTCCTTAGTTGCCAGCACGTAATGGTGGGAACTCTAAGGAGACCGCCGGTGACAAACCG
			1.43106	25.073		-4.09916	1.04496		8.75314e-05	0.000876075		Xanthomonadales	Arenimonas	daechungensis		ASV_712	GGTAGTCCACGCCCTAAACGATGCGAACTGGACGTTGGGAGCAATTAGGCTCTCAGTGTCGAAGCTAACGCGTTAAGTTCGCCGCCTGGGGAGTACGGTCGCAAGACTGAAACTCAAAGGAATTGACGGGGGCCCGCACAAGCGGTGGAGTATGTGGTTTAATTCGATGCAACGCGCAGAACCTTACCTGGCCTTGACATCCACGGAATCCTTGAGAGATCAGGGAGTGCCTTCGGGAACCGTGAGACAGGTGCTGCATGGCTGTCGTCAGCTCGTGTCGTGAGATGTTGGGTTAAGTCCCGCAACGAGCGCAACCCTTGTCCTTAGTTGCCAGCGAGTAATGTCGGGAACTCTAAGGAGACTGCCGGTGACAAACCG
			127.758	5.37323		4.57062	0.510714		3.57186e-19	1.713e-17		Streptosporangiales	Nonomuraea	salmonea		ASV_90	GGTAGTCCACGCTGTAAACGTTGGGCGCTAGGTGTGGGGATCTTCCACGATCTCCGTGCCGGAGCTAACGCATTAAGCGCCCCGCCTGGGGAGTACGGCCGCAAGGCTAAAACTCAAAGGAATTGACGGGGGCCCGCACAAGCGGCGGAGCATGTTGCTTAATTCGACGCAACGCGAAGAACCTTACCAAGGTTTGACATCACCCGGAAACGTGCAGAGATGTGCGCCTCTTCGGACTGGGTGACAGGTGGTGCATGGCTGTCGTCAGCTCGTGTCGTGAGATGTTGGGTTAAGTCCCGCAACGAGCGCAACCCTTGTTCCATGTTGCCAGCAACCTCTTCGGAGGGTTGGGGACTCATGGGAGACTGCCGGGGTCAACTCG
			91.1324	0		24.4783	1.36074		2.37712e-72	1.36803e-69		Streptomycetales	Streptomyces	NA		ASV_268	GGTAGTCCACGCCGTAAACGTTGGGAACTAGGTGTGGGCGACATTCCACGTTGTCCGCGCCGCAGCTAACGCATTAAGTTCCCCGCCTGGGGAGTACGGCCGCAAGGCTAAAACTCAAAGGAATTGACGGGGGCCCGCACAAGCGGCGGAGCATGTGGCTTAATTCGACGCAACGCGAAGAACCTTACCAAGGCTTGACATACGCCGGAAACATCCAGAGATGGGTGCCCCCTTGTGGTCGGTGTACAGGTGGTGCATGGCTGTCGTCAGCTCGTGTCGTGAGATGTTGGGTTAAGTCCCGCAACGAGCGCAACCCTTGTTCTGTGTTGCCAGCATGCCTTTCGGGGTGATGGGGACTCACAGGAGACTGCCGGGGTCAACTCG
			163.481	21.1124		2.95317	0.498959		3.24575e-09	7.32521e-08		Streptomycetales	Streptomyces	NA		ASV_119	GGTAGTCCACGCCGTAAACGGTGGGAACTAGGTGTTGGCGACATTCCACGTCGTCGGTGCCGCAGCTAACGCATTAAGTTCCCCGCCTGGGGAGTACGGCCGCAAGGCTAAAACTCAAAGGAATTGACGGGGGCCCGCACAAGCAGCGGAGCATGTGGCTTAATTCGACGCAACGCGAAGAACCTTACCAAGGCTTGACATACGCCGGAAAGCATCAGAGATGGTGCCCCCCTTGTGGTCGGTGTACAGGTGGTGCATGGCTGTCGTCAGCTCGTGTCGTGAGATGTTGGGTTAAGTCCCGCAACGAGCGCAACCCTTGTCCTGTGTTGCCAGCAACTCCTTCGGGAGGTTGGGGACTCACAGGAGACCGCCGGGGTCAACTCG
			66.061	8.70648		2.92088	0.714015		4.29906e-05	0.000466814		Streptomycetales	Streptomyces	abietis		ASV_316	GGTAGTCCACGCCGTAAACGTTGGGAACTAGGTGTTGGCGACATTCCACGTCGTCGGTGCCGCAGCTAACGCATTAAGTTCCCCGCCTGGGGAGTACGGCCGCAAGGCTAAAACTCAAAGGAATTGACGGGGGCCCGCACAAGCAGCGGAGCATGTGGCTTAATTCGACGCAACGCGAAGAACCTTACCAAGGCTTGACATACACCGGAAAGCGCCAGAGATGGTGCCCCCCTTGTGGTCGGTGTACAGGTGGTGCATGGCTGTCGTCAGCTCGTGTCGTGAGATGTTGGGTTAAGTCCCGCAACGAGCGCAACCCCTGTCCCGTGTTGCCAGCAGGCCCTTGTGGTGCTGGGGACTCACGGGAGACCGCCGGGGTCAACTCG
			202.691	31.6352		2.6808	0.288393		1.46329e-20	7.65565e-19		Streptomycetales	Streptomyces	cocklensis		ASV_123	GGTAGTCCACGCCGTAAACGTTGGGAACTAGGTGTGGGCGACATTCCACGTTGTCCGTGCCGCAGCTAACGCATTAAGTTCCCCGCCTGGGGAGTACGGCCGCAAGGCTAAAACTCAAAGGAATTGACGGGGGCCCGCACAAGCGGCGGAGCATGTGGCTTAATTCGACGCAACGCGAAGAACCTTACCAAGGCTTGACATACACCAGAAAACCCTGGAGACAGGGTCCCCCTTGTGGCTGGTGTACAGGTGGTGCATGGCTGTCGTCAGCTCGTGTCGTGAGATGTTGGGTTAAGTCCCGCAACGAGCGCAACCCCTGTCCTGTGTTGCCAGCAGGCCCTTGTGGTGCTGGGGACTCACGGGAGACCGCCGGGGTCAACTCG
			1236.59	212.325		2.54201	0.431645		3.88265e-09	8.59409e-08		Streptomycetales	Streptomyces	NA		ASV_9	GGTAGTCCACGCCGTAAACGGTGGGAACTAGGTGTTGGCGACATTCCACGTCGTCGGTGCCGCAGCTAACGCATTAAGTTCCCCGCCTGGGGAGTACGGCCGCAAGGCTAAAACTCAAAGGAATTGACGGGGGCCCGCACAAGCAGCGGAGCATGTGGCTTAATTCGACGCAACGCGAAGAACCTTACCAAGGCTTGACATACGCCGGAAAGCATCAGAGATGGTGCCCCCCTTGTGGTCGGTGTACAGGTGGTGCATGGCTGTCGTCAGCTCGTGTCGTGAGATGTTGGGTTAAGTCCCGCAACGAGCGCAACCCTTGTCCTGTGTTGCCAGCATGCCCTTCGGGGTGATGGGGACTCACAGGAGACCGCCGGGGTCAACTCG
			442.967	112.96		1.97104	0.412717		1.79027e-06	2.90226e-05		Streptomycetales	Streptomyces	NA		ASV_34	GGTAGTCCACGCCGTAAACGGTGGGAACTAGGTGTTGGCGACATTCCACGTCGTCGGTGCCGCAGCTAACGCATTAAGTTCCCCGCCTGGGGAGTACGGCCGCAAGGCTAAAACTCAAAGGAATTGACGGGGGCCCGCACAAGCAGCGGAGCATGTGGCTTAATTCGACGCAACGCGAAGAACCTTACCAAGGCTTGACATACACCGGAAAGCATCAGAGATGGTGCCCCCCTTGTGGTCGGTGTACAGGTGGTGCATGGCTGTCGTCAGCTCGTGTCGTGAGATGTTGGGTTAAGTCCCGCAACGAGCGCAACCCTTGTTCTGTGTTGCCAGCATGCCCTTCGGGGTGATGGGGACTCACAGGAGACCGCCGGGGTCAACTCG
			454.765	128.306		1.82544	0.217661		5.004e-17	1.91987e-15		Streptomycetales	Kitasatospora	NA		ASV_46	GGTAGTCCACGCCGTAAACGTTGGGAACTAGGTGTTGGCGACATTCCACGTCGTCGGTGCCGCAGCTAACGCATTAAGTTCCCCGCCTGGGGAGTACGGCCGCAAGGCTAAAACTCAAAGGAATTGACGGGGGCCCGCACAAGCAGCGGAGCATGTGGCTTAATTCGACGCAACGCGAAGAACCTTACCAAGGCTTGACATATACCGGAAACGGCTAGAGATAGTCGCCCCCTTGTGGTCGGTATACAGGTGGTGCATGGTTGTCGTCAGCTCGTGTCGTGAGATGTTGGGTTAAGTCCCGCAACGAGCGCAACCCTTGTTCTGTGTTGCCAGCATGCCTTTCGGGGTGATGGGGACTCACAGGAGACTGCCGGGGTCAACTCG
			149.668	47.3393		1.66165	0.360464		4.03132e-06	5.94878e-05		Streptomycetales	Streptomyces	NA		ASV_121	GGTAGTCCACGCCGTAAACGGTGGGAACTAGGTGTTGGCGACATTCCACGTCGTCGGTGCCGCAGCTAACGCATTAAGTTCCCCGCCTGGGGAGTACGGCCGCAAGGCTAAAACTCAAAGGAATTGACGGGGGCCCGCACAAGCAGCGGAGCATGTGGCTTAATTCGACGCAACGCGAAGAACCTTACCAAGGCTTGACATACGCCGGAAAGCATCAGAGATGGTGCCCCCCTTGTGGTCGGTGTACAGGTGGTGCATGGCTGTCGTCAGCTCGTGTCGTGAGATGTTGGGTTAAGTCCCGCAACGAGCGCAACCCTTGTTCTGTGTTGCCAGCATGCCCTTCGGGGTGATGGGGACTCACAGGAGACCGCCGGGGTCAACTCG
			1017.58	341.013		1.57717	0.234179		1.64045e-11	4.72038e-10		Streptomycetales	NA	NA		ASV_7	GGTAGTCCACGCCGTAAACGGTGGGAACTAGGTGTTGGCGACATTCCACGTCGTCGGTGCCGCAGCTAACGCATTAAGTTCCCCGCCTGGGGAGTACGGCCGCAAGGCTAAAACTCAAAGGAATTGACGGGGGCCCGCACAAGCAGCGGAGCATGTGGCTTAATTCGACGCAACGCGAAGAACCTTACCAAGGCTTGACATACACCGGAAACGGCCAGAGATGGTCGCCCCCTTGTGGTCGGTGTACAGGTGGTGCATGGCTGTCGTCAGCTCGTGTCGTGAGATGTTGGGTTAAGTCCCGCAACGAGCGCAACCCTTGTTCTGTGTTGCCAGCATGCCCTTCGGGGTGATGGGGACTCACAGGAGACTGCCGGGGTCAACTCG
			573.867	243.13		1.23857	0.148281		6.66138e-17	2.4733e-15		Streptomycetales	Streptomyces	NA		ASV_19	GGTAGTCCACGCCGTAAACGGTGGGAACTAGGTGTTGGCGACATTCCACGTCGTCGGTGCCGCAGCTAACGCATTAAGTTCCCCGCCTGGGGAGTACGGCCGCAAGGCTAAAACTCAAAGGAATTGACGGGGGCCCGCACAAGCAGCGGAGCATGTGGCTTAATTCGACGCAACGCGAAGAACCTTACCAAGGCTTGACATACACCGGAAAGCATTAGAGATAGTGCCCCCCTTGTGGTCGGTGTACAGGTGGTGCATGGCTGTCGTCAGCTCGTGTCGTGAGATGTTGGGTTAAGTCCCGCAACGAGCGCAACCCTTGTTCTGTGTTGCCAGCATGCCCTTCGGGGTGATGGGGACTCACAGGAGACTGCCGGGGTCAACTCG
			503.496	207.561		1.27852	0.281702		5.66428e-06	8.25264e-05		Sphingomonadales	Sphingomonas	NA		ASV_44	GGTAGTCCACGCCGTAAACGATGATAACTAGCTGTCCGGGCACTTAGTGCTTGGGTGGCGCAGCTAACGCATTAAGTTATCCGCCTGGGGAGTACGGCCGCAAGGTTAAAACTCAAATGAATTGACGGGGGCCTGCACAAGCGGTGGAGCATGTGGTTTAATTCGAAGCAACGCGCAGAACCTTACCAGCGTTTGACATGTCCGGACGATTTCCAGAGATGGATCTCTTCCCTTCGGGGACTGGAACACAGGTGCTGCATGGCTGTCGTCAGCTCGTGTCGTGAGATGTTGGGTTAAGTCCCGCAACGAGCGCAACCCTCGCCTTTAGTTACCATCATTTAGTTGGGTACTCTAAAGGAACCGCCGGTGATAAGCCG
			19.6926	103.405		-2.38946	0.609703		8.88961e-05	0.000882064		Sphingomonadales	Sphingobium	NA		ASV_240	GGTAGTCCACGCCGTAAACGATGATAACTAGCTGTCTGGGCACATGGTGCTTAGGTGGCGCAGCTAACGCATTAAGTTATCCGCCTGGGGAGTACGGTCGCAAGATTAAAACTCAAAGGAATTGACGGGGGCCTGCACAAGCGGTGGAGCATGTGGTTTAATTCGAAGCAACGCGCAGAACCTTACCAGCGTTTGACATCCTCATCGCGATTTCCAGAGATGGATTTCTTCAGTTCGGCTGGATGAGTGACAGGTGCTGCATGGCTGTCGTCAGCTCGTGTCGTGAGATGTTGGGTTAAGTCCCGCAACGAGCGCAACCCTCGACCTTAGTTGCCAGCATTTAGTTGGGTACTCTAAGGTAACCGCCGGTGATAAGCCG
			8.45727	49.3297		-2.53473	0.591077		1.80024e-05	0.000222804		Sphingomonadales	NA	NA		ASV_425	GGTAGTCCACGCCGTAAACGATGATAACTAGCTGTCGGGGGTCATGGACTTTCGGTGGCGCAGCTAACGCATTAAGTTATCCGCCTGGGGAGTACGGCCGCAAGGTTAAAACTCAAAGAAATTGACGGGGGCCTGCACAAGCGGTGGAGCATGTGGTTTAATTCGAAGCAACGCGCAGAACCTTACCAGCGTTTGACATCCTCATCGCGGTTACCAGAGATGGTTTCCTTCAGTTCGGCTGGATGAGTGACAGGTGCTGCATGGCTGTCGTCAGCTCGTGTCGTGAGATGTTGGGTTAAGTCCCGCAACGAGCGCAACCCTCGTCTTTAGTTGCCATCATTTAGTTGGGCACTCTAAAGAAACCGCCGGTGATAAGCCG
			20.7625	136.613		-2.71806	0.410794		3.67539e-11	9.83808e-10		Sphingomonadales	Sphingobium	NA		ASV_197	GGTAGTCCACGCCGTAAACGATGATAACTAGCTGCTGGGGTGCATGGCATTTCAGTGGCGCAGCTAACGCATTAAGTTATCCGCCTGGGGAGTACGGTCGCAAGATTAAAACTCAAAGGAATTGACGGGGGCCTGCACAAGCGGTGGAGCATGTGGTTTAATTCGAAGCAACGCGCAGAACCTTACCAACGTTTGACATCCCTAGTATGGTTTGTGGAGACACATTCCTTCAGTTCGGCTGGCTAGGTGACAGGTGCTGCATGGCTGTCGTCAGCTCGTGTCGTGAGATGTTGGGTTAAGTCCCGCAACGAGCGCAACCCTCGCCTTTAGTTGCCATCATTTAGTTGGGTACTCTAAAGGAACCGCCGGTGATAAGCCG
			1.37588	45.9687		-5.04017	1.12389		7.30639e-06	0.000102557		Sphingomonadales	Sphingomonas	NA		ASV_483	GGTAGTCCACGCCGTAAACGATGATAACTAGCTGTCCGGGCACTTGGTGCTTGGGTGGCGCAGCTAACGCATTAAGTTATCCGCCTGGGGAGTACGGCCGCAAGGTTAAAACTCAAAGAAATTGACGGGGGCCTGCACAAGCGGTGGAGCATGTGGTTTAATTCGAAGCAACGCGCAGAACCTTACCAACGTTTGACATCCCTAGTATGGATCGTGGAGACACTTTCCTTCAGTTCGGCTGGCTAGGTGACAGGTGCTGCATGGCTGTCGTCAGCTCGTGTCGTGAGATGTTGGGTTAAGTCCCGCAACGAGCGCAACCCTCGCCTTTAGTTGCCATCATTTAGTTGGGCACTCTAAAGGAACCGCCGGTGATAAGCCG
			0	14.1447		-6.13094	1.38176		9.11954e-06	0.000124959		Sphingomonadales	Sphingobium	NA		ASV_866	GGTAGTCCACGCCGTAAACGATGATAACTAGCTGTCCGGGTGCATGGCACTTGGGTGGCGCAGCTAACGCATTAAGTTATCCGCCTGGGGAGTACGGTCGCAAGATTAAAACTCAAAGGAATTGACGGGGGCCTGCACAAGCGGTGGAGCATGTGGTTTAATTCGAAGCAACGCGCAGAACCTTACCAGCGTTTGACATCCTCATCGCGATTTCCAGAGATGGATTTCTTCAGTTCGGCTGGATGAGTGACAGGTGCTGCATGGCTGTCGTCAGCTCGTGTCGTGAGATGTTGGGTTAAGTCCCGCAACGAGCGCAACCCTCGACCTTAGTTGCCAGCATTTAGTTGGGTACTCTAAGGTAACCGCCGGTGATAAGCCG
			0	33.852		-7.38891	0.759419		2.25292e-22	1.36479e-20		Sphingomonadales	Sphingomonas	NA		ASV_584	GGTAGTCCACGCCGTAAACGATGATAACTAGCTGTCCGGGCACTTGGTGCTTGGGTGGCGCAGCTAACGCATTAAGTTATCCGCCTGGGGAGTACGGCCGCAAGGTTAAAACTCAAAGAAATTGACGGGGGCCTGCACAAGCGGTGGAGCATGTGGTTTAATTCGAAGCAACGCGCAGAACCTTACCAACGTTTGACATGTCTAGTATGGTTTCCAGAGATGGATTCCTTCAGTTCGGCTGGCTAGAACACAGGTGCTGCATGGCTGTCGTCAGCTCGTGTCGTGAGATGTTGGGTTAAGTCCCGCAACGAGCGCAACCCTCGACCTTAGTTGCCATCATTTAGTTGGGCACTCTAAGGTAACCGCCGGTGATAAGCCG
			0	14.7042		-23.952	1.80342		2.96693e-40	3.41494e-38		Sphingomonadales	Sphingomonas	NA		ASV_975	GGTAGTCCACGCCGTAAACGATGATGACTAGCTGTCGGGGCTCTTGGAGTTTCGGTGGCGCAGCTAACGCGTTAAGTCATCCGCCTGGGGAGTACGGCCGCAAGGTTAAAACTCAAAGAAATTGACGGGGGCCTGCACAAGCGGTGGAGCATGTGGTTTAATTCGAAGCAACGCGCAGAACCTTACCAGCGTTTGACATGGTAGGACGGCTTCCAGAGATGGATTCCTTCCCTTACGGGACCTACACACAGGTGCTGCATGGCTGTCGTCAGCTCGTGTCGTGAGATGTTGGGTTAAGTCCCGCAACGAGCGCAACCCTCGTCTTTAGTTGCCATCATTTAGTTGGGCACTCTAAAGAAACTGCCGGTGATAAGCCG
			1003.51	230.584		2.12212	0.203601		1.94912e-25	1.40215e-23		Sphingobacteriales	Pedobacter	panaciterrae		ASV_22	GGTAGTCCACGCCCTAAACGATGAATACTCGCTGTTAGCGATATACAGTTAGCGGCTAAGCGAAAGCGTTAAGTATTCCACCTGGGGAGTACGCCCGCAAGGGTGAAACTCAAAGGAATTGACGGGGGCCCGCACAAGCGGAGGAGCATGTGGTTTAATTCGATGATACGCGAGGAACCTTACCCGGGCTTGAAAGTTAGTGAATTATCTAGAGATAGATAAGTGAGCAATCACACGAAACTAGGTGCTGCATGGCTGTCGTCAGCTCGTGCCGTGAGGTGTTGGGTTAAGTCCCGCAACGAGCGCAACCCCTATGTTTAGTTGCCAGCACGTTAAGGTGGGGACTCTAAACAGACTGCCTGTGCAAACAGA
			239.303	78.269		1.61238	0.287603		2.06743e-08	4.2493e-07		Sphingobacteriales	Pedobacter	panaciterrae		ASV_102	GGTAGTCCACGCCCTAAACGATGAATACTCGCTGTTAGCGATATACAGTTAGCGGCTAAGCGAAAGCGTTAAGTATTCCACCTGGGGAGTACGCCCGCAAGGGTGAAACTCAAAGGAATTGACGGGGGCCCGCACAAGCGGAGGAGCATGTGGTTTAATTCGATGATACGCGAGGAACCTTACCCGGGCTTGAAAGTTAGTGAATCATTTAGAGATAGATGAGTGAGCAATCACACGAAACTAGGTGCTGCATGGCTGTCGTCAGCTCGTGCCGTGAGGTGTTGGGTTAAGTCCCGCAACGAGCGCAACCCCTATGTTTAGTTGCCAGCACGTTAAGGTGGGGACTCTAAACAGACTGCCTGTGCAAACAGA
			331.262	116.485		1.50801	0.22124		9.35051e-12	2.7596e-10		Sphingobacteriales	Mucilaginibacter	pocheonensis		ASV_72	GGTAGTCCACGCCCTAAACGATGAATACTCGATGTTGGCGATATACGGTCAGCGTCTAAGCGAAAGCGTTAAGTATTCCACCTGGGGAGTACGCCCGCAAGGGTGAAACTCAAAGGAATTGACGGGGGCCCGCACAAGCGGAGGAGCATGTGGTTTAATTCGATGATACGCGAGGAACCTTACCCGGGCTTGAAAGTTAGTGAATGATACAGAGACGTATCAGTCCTTCGGGACACGAAACTAGGTGCTGCATGGCTGTCGTCAGCTCGTGCCGTGAGGTGTTGGGTTAAGTCCCGCAACGAGCGCAACCCCTATGTTTAGTTGCCAGCACGTCAAGGTGGGGACTCTAAACAGACTGCCTATGCAAATAGA
			9.75115	83.4189		-3.08671	0.506419		1.09323e-09	2.51661e-08		Sphingobacteriales	Pedobacter	wanjuense		ASV_296	GGTAGTCCACGCCCTAAACGATGAACACTCGCTGTTGGCGATACACAGTCAGCGGCTAAGCGAAAGCGTTAAGTGTTCCACCTGGGGAGTACGCCCGCAAGGGTGAAACTCAAAGGAATTGACGGGGGCCCGCACAAGCGGAGGAGCATGTGGTTTAATTCGATGATACGCGAGGAACCTTACCCGGGCTTGAAAGTTAGTGAATGATTTAGAGATAGATCAGTGAGCAATCACACGAAACTAGGTGCTGCATGGCTGTCGTCAGCTCGTGCCGTGAGGTGTTGGGTTAAGTCCCGCAACGAGCGCAACCCCTATGTTTAGTTGCCAGCATGTAATGATGGGGACTCTAAACAGACTGCCTGTGCAAACAGA
			67.016	21.5573		1.63692	0.328187		6.1083e-07	1.06525e-05		Saccharimonadales	NA	NA		ASV_314	GGTAGTCCACGCCGTAAACGATGGATACTAGCTGTTGGAGGTATCGACCCCTTCAGTAGCGAAGCTAACGCGTTAAGTATCCCGCCTGTGGAGTACGGTCGCAAGACTAAAACATAAAGGAATTGACGGGGACCCGCACAAGCGGTGGATCGTGTTCTTTAATTCGATGCTAAACGAAGAACCTTACCAGGGCTTGACATCTAGGGAATTTTTGGGAAACCAATTAGTGCCTTTTGGAACCCTATGACAGGTGATGCATGGCCGTCGTCAGCTCGTGTCGTGAGATGTTTGGTTAAGTCCATCAACGAGCGCAACCCTTGTGATTAGTTGAATTTTTCTAATCAGACTGCCCCGGTAACGGG
			0	10.6259		-5.71774	1.33315		1.79557e-05	0.000222804		Saccharimonadales	NA	NA		ASV_1242	GGTAGTCCACGCCGTAAACGATGGATACTAGCTGTTGGAGGTATCGACCCCTTCAGTAGCGAAGCTAACGCGTTAAGTATCCCGCCTGTGGAGTACGGTCGCAAGACTAAAACATAAAGGAATTGACGGGGACCCGCACAAGCGGTGGATCATGTTCTTTAATTCGATGCTAAACGAAGAACCTTACCAGGGCTTGACATCCAGGGAAGCACTACGAAAGTAGAGTGTGCCTTTTGGAACCCTGTGACAGATGATGCATGGCCGTCGTCAGCTCGTGTCGTGAGATGTTTGGTTAAGTCCATCAACGAGCGCAACCCTTGTGAATAGTTGGATTTTTCTATTCAGACTGCCCCGGTAACGGG
			0	17.6615		-6.4502	1.47217		1.17897e-05	0.000159647		Saccharimonadales	NA	NA		ASV_873	GGTAGTCCACGCCGTAAACGATGGATACTAGCTGTTGGAGGTATCGACCCCTTCAGTAGCGAAGCTAACGCGTTAAGTATCCCGCCTGTGGAGTACGGTCGCAAGACTAAAACATAAAGGAATTGACGGGGACCCGCACAAGCGGTGGATCGTGTTCTTTAATTCGATGATAAACGAAGAACCTTACCAGGGTTTGACATCCTTGGAATTTCTGTGAAAGCAGAGAGTGCTTTATTGAGCCAAGTGACAGGTGATGCATGGCCGTCGTCAGCTCGTGTCGTGAGATGTTTGGTTAAGTCCATCAACGAGCGCAACCCTTGTGATTAGTTGTATTTTTCTAATCAGACTGCCCCGGTAACGGG
			19.9061	0.57888		5.09462	1.24867		4.50282e-05	0.000484369		Rhizobiales	Mesorhizobium	loti		ASV_823	GGTAGTCCACGCCGTAAACGATGGAAGCTAGCCGTTGGCAAGTTTACTTGTCGGTGGCGCAGCTAACGCATTAAGCTTCCCGCCTGGGGAGTACGGTCGCAAGATTAAAACTCAAAGGAATTGACGGGGGCCCGCACAAGCGGTGGAGCATGTGGTTTAATTCGAAGCAACGCGCAGAACCTTACCAGCCCTTGACATCCCGGTCGCGGTTTCCAGAGATGGATACCTTCAGTTCGGCTGGACCGGTGACAGGTGCTGCATGGCTGTCGTCAGCTCGTGTCGTGAGATGTTGGGTTAAGTCCCGCAACGAGCGCAACCCTCGCCCTTAGTTGCCAGCATTAAGTTGGGCACTCTAAGGGGACTGCCGGTGATAAGCCGA
			62.7426	2.52384		4.62442	0.892241		2.18425e-07	4.19012e-06		Rhizobiales	Mesorhizobium	NA		ASV_415	GGTAGTCCACGCTGTAAACGATGGAAGCTAGCCGTTGGCAAGTTTACTTGTCGGTGGCGCAGCTAACGCATTAAGCTTCCCGCCTGGGGAGTACGGTCGCAAGATTAAAACTCAAAGGAATTGACGGGGGCCCGCACAAGCGGTGGAGCATGTGGTTTAATTCGAAGCAACGCGCAGAACCTTACCAGCCCTTGACATCCCGGTCGCGGTTTCCAGAGATGGATTCCTTCAGTTCGGCTGGACCGGTGACAGGTGCTGCATGGCTGTCGTCAGCTCGTGTCGTGAGATGTTGGGTTAAGTCCCGCAACGAGCGCAACCCTCGCCCTTAGTTGCCAGCATTAAGTTGGGCACTCTAAGGGGACTGCCGGTGATAAGCCGA
			36.6176	2.03383		4.16266	0.888833		2.82305e-06	4.39099e-05		Rhizobiales	Phyllobacterium	NA		ASV_421	GGTAGTCCACGCCGTAAACTATGAGAGCTAGCCGTCGGGCAGTATACTGTTCGGTGGCGCAGCAAACGCATTAAGCTCTCCGCCTGGGGAGTACGGTCGCAAGATTAAAACTCAAAGGAATTGACGGGGGCCCGCACAAGCGGTGGAGCATGTGGTTTAATTCGAAGCAACGCGCAGAACCTTACCAGCCCTTGACATCCCGATCGCGGTTACCAGAGATGGTTTCCTTCAGTTAGGCTGGATCGGTGACAGGTGCTGCATGGCTGTCGTCAGCTCGTGTCGTGAGATGTTGGGTTAAGTCCCGCAACGAGCGCAACCCTCGCCCTTAGTTGCCATCATTCAGTTGGGCACTCTAAGGGGACTGCCGGTGATAAGCCGA
			140.592	61.2671		1.19762	0.284828		2.61423e-05	0.000300898		Rhizobiales	NA	NA		ASV_159	GGTAGTCCACGCCGTAAACTATGAGAGCTAGCCGTCGGCAAGTTTACTTGTCGGTGGCGCAGCTAACGCATTAAGCTCTCCGCCTGGGGAGTACGGTCGCAAGATTAAAACTCAAAGGAATTGACGGGGGCCCGCACAAGCGGTGGAGCATGTGGTTTAATTCGAAGCAACGCGCAGAACCTTACCAGCCCTTGACATCCCGGTCGCGGTTTCCAGAGATGGATTCCTTCAGTTCGGCTGGACCGGTGACAGGTGCTGCATGGCTGTCGTCAGCTCGTGTCGTGAGATGTTGGGTTAAGTCCCGCAACGAGCGCAACCCTCGCCCTTAGTTGCCAGCATTAAGTTGGGCACTCTAAGGGGACTGCCGGTGATAAGCCGA
			34.4833	0		21.3434	1.54578		2.29588e-43	3.77508e-41		Pseudonocardiales	Allokutzneria	NA		ASV_724	GGTAGTCCACGCCGTAAACGTTGGGCGCTAGGTGTGGGGGACTTTCCACGTCCTCCGTGCCGCAGCTAACGCATTAAGCGCCCCGCCTGGGGAGTACGGCCGCAAGGCTAAAACTCAAAGGAATTGACGGGGGCCCGCACAAGCGGCGGAGCATGTGGATTAATTCGATGCAACGCGAAGAACCTTACCTGGGCTTGACATGCATTGGAAACCGGTAGAGATATCGGCCCCCTTGTGGCCGGTGTACAGGTGGTGCATGGCTGTCGTCAGCTCGTGTCGTGAGATGTTGGGTTAAGTCCCGCAACGAGCGCAACCCTCGTTCCATGTTGCCAGCACGTTATGGTGGGGACTCATGGGAGACTGCCGGGGTCAACTCG
			16.1898	0		6.59497	1.54691		2.01428e-05	0.000246642		Pseudonocardiales	Allokutzneria	NA		ASV_1081	GGTAGTCCACGCCGTAAACGTTGGGCGCTAGGTGTGGGGGACTTCCACGTCCTCCGTGCCGCAGCTAACGCATTAAGCGCCCCGCCTGGGGAGTACGGCCGCAAGGCTAAAACTCAAAGGAATTGACGGGGGCCCGCACAAGCGGCGGAGCATGTGGATTAATTCGATGCAACGCGAAGAACCTTACCTGGGCTTGACATGCATTGGAAACCGGTAGAGATATCGGCCCCCTTGTGGCCGGTGTACAGGTGGTGCATGGCTGTCGTCAGCTCGTGTCGTGAGATGTTGGGTTAAGTCCCGCAACGAGCGCAACCCTCGTTCCATGTTGCCAGCACGTTATGGTGGGGACTCATGGGAGACTGCCGGGGTCAACTCG
			188.477	5.83048		5.0145	0.697851		6.6897e-13	2.08104e-11		Pseudonocardiales	Kutzneria	NA		ASV_166	GGTAGTCCACGCCGTAAACGGTGGGAACTAGGTGTGGGGGGCTTCCACGTCCTCCGTGCCGTAGCTAACGCATTAAGTTCCCCGCCTGGGGAGTACGGCCGCAAGGCTAAAACTCAAAGGAATTGACGGGGGCCCGCACAAGCGGCGGAGCATGTGGATTAATTCGATGCAACGCGAAGAACCTTACCTGGGCTTGACATGCACTGGAAACCAGTAGAGATATTGGCCCCCTTGTGGCCGGTGTACAGGTGGTGCATGGCTGTCGTCAGCTCGTGTCGTGAGATGTTGGGTTAAGTCCCGCAACGAGCGCAACCCTCGTTCCATGTTGCCAGCGCGTAATGGCGGGGACTCATGGGAGACTGCCGGGGTCAACTCG
			29.0659	1.87061		3.95791	0.987625		6.13643e-05	0.000636309		Pseudonocardiales	Amycolatopsis	NA		ASV_676	GGTAGTCCACGCTGTAAACGGTGGGTGCTAGGTGTGGGCGACATCCACGTTGTCCGTGCCGTAGCTAACGCATTAAGCACCCCGCCTGGGGAGTACGGCCGCAAGGCTAAAACTCAAAGGAATTGACGGGGGCCCGCACAAGCGGCGGAGCATGTGGATTAATTCGATGCAACGCGAAGAACCTTACCTGGGCTTGACATGCACTGGAAACCAGTAGAGATATTGGCCCCCTTGTGGCCGGTGTACAGGTGGTGCATGGCTGTCGTCAGCTCGTGTCGTGAGATGTTGGGTTAAGTCCCGCAACGAGCGCAACCCTTATCCTACGTTGCCAGCGCGTTATGGCGGGGACTCGTGGGAGACTGCCGGGGTCAACTCG
			30.5828	2.50508		3.60854	0.90254		6.38264e-05	0.00065593		Pseudonocardiales	Amycolatopsis	balhimycina		ASV_525	GGTAGTCCACGCTGTAAACGGTGGGTGCTAGGTGTGGGCGACATCCACGTTGTCCGTGCCGTAGCTAACGCATTAAGCACCCCGCCTGGGGAGTACGGCCGCAAGGCTAAAACTCAAAGGAATTGACGGGGGCCCGCACAAGCGGCGGAGCATGTGGATTAATTCGATGCAACGCGAAGAACCTTACCTGGGCTTGACATGCGCCAGACATCCTCAGAGATGGGGCTTCCCTTGTGGTTGGTGTACAGGTGGTGCATGGCTGTCGTCAGCTCGTGTCGTGAGATGTTGGGTTAAGTCCCGCAACGAGCGCAACCCTTATCCTACGTTGCCAGCGCGTTATGGCGGGGACTCGTGGGAGACTGCCGGGGTCAACTCG
			230.93	43.7346		2.40033	0.311717		1.35673e-14	4.59294e-13		Pseudonocardiales	NA	NA		ASV_87	GGTAGTCCACGCCGTAAACGGTGGGTGCTAGGTGTGGGGGACTTCCACGTCCTCTGTGCCGCAGCTAACGCATTAAGCACCCCGCCTGGGGAGTACGGCCGCAAGGCTAAAACTCAAAGGAATTGACGGGGGCCCGCACAAGCGGCGGAGCATGTGGATTAATTCGATGCAACGCGAAGAACCTTACCTGGGCTTGACATGCACTGGAAACCAGTAGAGATATTGGCCCCCTTGTGGCCGGTGTACAGGTGGTGCATGGCTGTCGTCAGCTCGTGTCGTGAGATGTTGGGTTAAGTCCCGCAACGAGCGCAACCCTCGTTCCATGTTGCCAGCGGGTAATGCCGGGGACTCATGGGAGACTGCCGGGGTCAACTCG
			155.355	36.3749		2.09428	0.442004		2.15685e-06	3.40074e-05		Pseudonocardiales	Amycolatopsis	NA		ASV_124	GGTAGTCCACGCTGTAAACGTTGGGCGCTAGGTGTGGGCGACATCCACGTTGTCCGTGCCGTAGCTAACGCATTAAGCGCCCCGCCTGGGGAGTACGGCCGCAAGGCTAAAACTCAAAGGAATTGACGGGGGCCCGCACAAGCGGCGGAGCATGTGGATTAATTCGATGCAACGCGAAGAACCTTACCTGGGCTTGACATGCGCCAGACATCCCCAGAGATGGGGCTTCCCTTGTGGTTGGTGTACAGGTGGTGCATGGCTGTCGTCAGCTCGTGTCGTGAGATGTTGGGTTAAGTCCCGCAACGAGCGCAACCCTTATCCTACGTTGCCAGCGCGTTATGGCGGGGACTCGTGGGAGACTGCCGGGGTCAACTCG
			508.532	162.169		1.64896	0.262897		3.55833e-10	8.35845e-09		Pseudonocardiales	Lechevalieria	NA		ASV_35	GGTAGTCCACGCCGTAAACGGTGGGTGCTAGGTGTGGGGGACTTCCACGTCCTCCGTGCCGCAGCTAACGCATTAAGCACCCCGCCTGGGGAGTACGGCCGCAAGGCTAAAACTCAAAGGAATTGACGGGGGCCCGCACAAGCGGCGGAGCATGTGGATTAATTCGATGCAACGCGAAGAACCTTACCTGGGCTTGACATGGACTAGAAAGCTCTAGAGATAGGGCCTCCCTTGTGGCTGGTTCACAGGTGGTGCATGGCTGTCGTCAGCTCGTGTCGTGAGATGTTGGGTTAAGTCCCGCAACGAGCGCAACCCTCGTTCCATGTTGCCAGCGCGTAATGGCGGGGACTCATGGGAGACTGCCGGGGTCAACTCG
			34.5774	130.608		-1.91435	0.359827		1.03665e-07	2.0933e-06		Pseudomonadales	NA	NA		ASV_185	GGTAGTCCACGCCGTAAACGATGTCGACTAGCCGTTGGAGACCTTAGAGTCTTTAGTGGCGCAGCTAACGCACTAAGTCGACCGCCTGGGGAGTACGGCCGCAAGGTTAAAACTCAAATGAATTGACGGGGGCCCGCACAAGCGGTGGAGCATGTGGTTTAATTCGATGCAACGCGAAGAACCTTACCGCCCCTTGACATCCTGGGAACTCGCTAGAGATAGCTTGGTGCCGAAAGGAACCCAGAGACAGGTGCTGCATGGCTGTCGTCAGCTCGTGTCGTGAGATGTTGGGTTAAGTCCCGTAACGAGCGCAACCCTTGTCCTTAGTTGCCAGCACGTAATGGTGGGAACTCTAAGGAGACTGCCGGTGACAAACCG
			0	15.0435		-6.21912	1.25745		7.58198e-07	1.29009e-05		Pseudomonadales	NA	NA		ASV_1004	GGTAGTCCACGCCGTAAACGATGTCGACTAGCCGTTGGAGACCTTAGAGTCTTTAGTGGCGCAGCTAACGCACTAAGTCGACCGCCTGGGGAGTACGGCCGCAAGGTTAAAACTCAAATGAATTGACGGGGGCCCGCACAAGCGGTGGAGCATGTGGTTTAATTCGATGCAACGCGAAGAACCTTACCGCCCCTTGACATCCTGGGAACTCGCTAGAGATAGCTTGGTGCCGAAAGGAACCCAGAGACAGGTGCTGCATGGCTGTCGTCAGCTCGTGTCGTGAGATGTTGGGTTAAGTCCCGTAACGAGCGCAACCCTTGTCCTTAGTTGCCAGCGCGTAATGGCGGGAACTCTAAGGAGACTGCCGGTGACAAACCG
			0	29.5346		-24.9091	2.07468		3.29545e-33	3.16089e-31		Pseudomonadales	NA	NA		ASV_684	GGTAGTCCACGCCGTAAACGATGTCGACTAGCCGTTGGAGACCTTAGAGTCTTTAGTGGCGTAGCTAACGCACTAAGTCGACCGCCTGGGGAGTACGGCCGCAAGGTTAAAACTCAAATGAATTGACGGGGGCCCGCACAAGCGGTGGAGCATGTGGTTTAATTCGATGCAACGCGAAGAACCTTACCGCCCCTTGACATCCTGGGAACTTGCTAGAGATAGCTTGGTGCCGAAAGGAACCCAGAGACAGGTGCTGCATGGCTGTCGTCAGCTCGTGTCGTGAGATGTTGGGTTAAGTCCCGTAACGAGCGCAACCCTTGTCCTTAGTTGCCAGCGCGTAATGGCGGGAACTCTAAGGAGACTGCCGGTGACAAACCG
			37.2846	4.16411		3.15676	0.625236		4.44342e-07	7.86827e-06		Propionibacteriales	Nocardioides	ginsengisegetis		ASV_569	GGTAGTCCACACCGTAAACGTTGGGCGCTAGGTGTGGGGCCTATTCCATGGGTTCCGTGCCGCAGCTAACGCATTAAGCGCCCCGCCTGGGGAGTACGGCCGCAAGGCTAAAACTCAAAGGAATTGACGGGGGCCCGCACAAGCGGCGGAGCATGCGGATTAATTCGATGCAACGCGAAGAACCTTACCTGGGTTTGACATATGCCGGAAAGCTCTAGAGATAGAGCCCCTTTTAGTCGGTATACAGGTGGTGCATGGCTGTCGTCAGCTCGTGTCGTGAGATGTTGGGTTAAGTCCCGCAACGAGCGCAACCCTCGTCCTATGTTGCCAGCGGGTAATGCCGGGGACTCATAGGAGACTGCCGGGGTCAACTCG
			0	14.4219		-6.15832	1.36604		6.5396e-06	9.40885e-05		Propionibacteriales	Nocardioides	NA		ASV_935	GGTAGTCCACACCGTAAACGTTGGGCGCTAGGTGTGGGATCCATTCCACGGGTTCCGTGCCGCAGCTAACGCATTAAGCGCCCCGCCTGGGGAGTACGGCCGCAAGGCTAAAACTCAAAGGAATTGACGGGGGCCCGCACAAGCGGCGGAGCATGCGGATTAATTCGATGCAACGCGAAGAACCTTACCTGGGTTTGACATGCGCCGGAAAGCTCTAGAGATAGAGCCCCTTTTAGTCGGTGTACAGGTGGTGCATGGCTGTCGTCAGCTCGTGTCGTGAGATGTTGGGTTAAGTCCCGCAACGAGCGCAACCCTCGTTCCATGTTGCCAGCAACACCCTTCGGGGTGGTTGGGGACTCATGGGAGACTGCCGGGGTCAACTCG
			0.489143	10.7423		-4.23155	1.01731		3.18898e-05	0.000363418		Pedosphaerales	NA	NA		ASV_1136	GGTAGTCCTAGCCGTAAACGGTGCTTGCTTGCTGTAAAAGGAATCGACCCCTTTTGTGGCGTAGCCAACGCGTTAAGCAAGCCGCCTGGGAAGTACGGTCGCAAGATTAAAACTCAAAGAAATTGACGGGGGCCTGCACAAGCGGTGGAGTATGTGGCTCAATTCGATGCAACGCGAAGAACCTTACCTGGCCTTGACATGCATATAGTAGAAGGGTGAAAGCCTGACGAGGTAGCAATACCAGTATGCACAGGTGCTGCATGGCTGTCGTCAGCTCGTGTCGTGAGATGTTGGGTTAAGTCCCGCAACGAGCGCAACCCCTATGTTCTGTTGCCACTCCCGCAAGGGAAGCACTCGGAACAGACTGCCTCGCTTAAACGAG
			0	14.754		-6.19174	1.09685		1.65179e-08	3.45674e-07		Pedosphaerales	NA	NA		ASV_888	GGTAGTCCTAGCTGTAAACGGTGCATATTTGCTGTAAAAGGAATCGACCCCTTTTGTGGCGTAGCAAACGCGTTAAATATGCCGCCTGGGAAGTACGGTCGCAAGATTAAAACTCAAAGAAATTGACGGGGGCCTGCACAAGCGGTGGAGTATGTGGCTTAATTCGATGCAACGCGAAGAACCTTACCTGGCCTTGACATGCATATAGTAGAAGGGTGAAAGCCTGACGAGGTAGCAATACCAGTATGCACAGGTGCTGCATGGCTGTCGTCAGCTCGTGTCGTGAGATGTTGGGTTAAGTCCCGCAACGAGCGCAACCCCTGTGTCCTGTTGCCACCCCTTAATTGGGAGCACTCTGGACAGACTGCCTCGCTTCAACGAG
			17.9659	0		6.74429	1.45703		3.67809e-06	5.49802e-05		Micrococcales	Cellulomonas	NA		ASV_1077	GGTAGTCCATGCCGTAAACGTTGGGCACTAGGTGTGGGGCTCATTCCACGAGTTCCGTGCCGCAGCAAACGCATTAAGTGCCCCGCCTGGGGAGTACGGCCGCAAGGCTAAAACTCAAAGAAATTGACGGGGGCCCGCACAAGCGGCGGAGCATGCGGATTAATTCGATGCAACGCGAAGAACCTTACCAAGGCTTGACATACACCGGAAAAGTGCAGAGATGTGCTCCCCGCAAGGTCGGTGTACAGGTGGTGCATGGTTGTCGTCAGCTCGTGTCGTGAGATGTTGGGTTAAGTCCCGCAACGAGCGCAACCCTCGTCCTATGTTGCCAGCGGGTTATGCCGGGGACTCATAGGAGACTGCCGGGGTCAACTCG
			10.6226	0		5.98711	1.38432		1.52575e-05	0.000195126		Micrococcales	Cryobacterium	NA		ASV_1070	GGTAGTCCATGCCGTAAACGTTGGGAACTAGATGTGGGGACCATTCCACGGTCTCCGTGTCGCAGCTAACGCATTAAGTTCCCCGCCTGGGGAGTACGGCCGCAAGGCTAAAACTCAAAGGAATTGACGGGGGCCCGCACAAGCGGCGGAGCATGCGGATTAATTCGATGCAACGCGAAGAACCTTACCAAGGCTTGACATATAGAGGAAACGGCTGGAAACAGTCGCCCCGCAAGGTCTCTATACAGGTGGTGCATGGTTGTCGTCAGCTCGTGTCGTGAGATGTTGGGTTAAGTCCCGCAACGAGCGCAACCCTCGTCCTATGTTGCCAGCACGTAATGGTGGGAACTCATGGGATACTGCCGGGGTCAACTCG
			18.9824	0.385736		5.44113	1.35413		5.86489e-05	0.000613681		Micrococcales	Promicromonospora	NA		ASV_579	GGTAGTCCATGCCGTAAACGTTGGGCACTAGGTGTGGGGCGGGTTCCACTCGTTCTGTGCCGCAGCTAACGCATTAAGTGCCCCGCCTGGGGAGTACGGCCGCAAGGCTAAAACTCAAAGGAATTGACGGGGGCCCGCACAAGCGGCGGAGCATGCGGATTAATTCGATGCAACGCGAAGAACCTTACCAAGGCTTGACATGTACGAGAACGCGTCAGAGATGACGAACTCTTTGGACACTCGTACACAGGTGGTGCATGGTTGTCGTCAGCTCGTGTCGTGAGATGTTGGGTTAAGTCCCGCAACGAGCGCAACCCCTATCCTATGTTGCCAGCGGGTCATGCCGGGGACTCATGGGAGACTGCCGGGGTCAACTCG
			100.954	51.0678		0.983035	0.218229		6.64948e-06	9.44884e-05		Micrococcales	Phycicoccus	NA		ASV_192	GGTAGTCCATGCCGTAAACGTTGGGAACTAGGTGTGGGTCTCATTCCACGAGATCCGTGCCGCAGCTAACGCATTAAGTTCCCCGCCTGGGGAGTACGGCCGCAAGGCTAAAACTCAAAGGAATTGACGGGGGCCCGCACAAGCGGCGGAGCATGCGGATTAATTCGATGCAACGCGAAGAACCTTACCAAGGCTTGACATATGCGAGAACGCTGCAGAGATGCAGAACTCTTTGGACACTCGCATACAGGTGGTGCATGGTTGTCGTCAGCTCGTGTCGTGAGATGTTGGGTTAAGTCCCGCAACGAGCGCAACCCTCGTTCTATGTTGCCAGCACGTAATGGTGGGGACTCATAGGAGACTGCCGGGGTCAACTCG
			1.32738	22.2215		-4.01899	0.947347		2.21183e-05	0.000259777		Longimicrobiales	NA	NA		ASV_755	GGTAGTCCACGCCGTAAACGATGGGCACTAGACGCGGGTGGGATCGACCCCTTCCGTGTCGCAGCTAACGCGATAAGTGCCCCGCCTGGGGAGTACGGCCGCAAGGCTGAAACTCAAAGGAATTGACGGGGGCCCGCACAAGCGGTGGAGCATGTGGTTTAATTCGAAGCAACGCGAAGAACCTTACCTGGGCTTGACATGCACGTGAAATCCTCGTGAAAGCGGGGACCCTCTTCGGAGCGCGTGCACAGGTGCTGCATGGCTGTCGTCAGCTCGTGTCGTGAGATGTTGGGTTAAGTCCCGCAACGAGCGCAACCCTTATCCTCTGTTACCAGCGAGTAAAGTCGGGGACTCTGAGGAGACTGCCGGTGACAAACCG
			37.1918	3.32042		3.47663	0.843441		3.75663e-05	0.000415758		Gemmatimonadales	Gemmatimonas	NA		ASV_616	GGTAGTCCACGCCGTAAACGATGGGCACTAGGTGCTTGGGGGAGCGACCCTCTGAGTGCCGGCGCTAACGCATTAAGTGCCCCGCCTGGGGAGTACGGCCGCAAGGCTGAAACTCAAAGGAATTGACGGGGGCCCGCACAAGCAGTGGAGCATGTGGTTTAATTCGACGCAACGCGAAGAACCTTACCTAGGCTTGACATACACGGGAAACGCTCGAGAAACCGAGCGCCTCCTTCGGGACCCGTGCACAGGTGCTGCATGGCTGTCGTCAGCTCGTGTCGTGAGATGTTGGGTTAAGTCCCGCAACGAGCGCAACCCTCGCTTCCAGTTGCTACCGGGTAATGCCGAGGACTCTGGAAGGACTGCCGGTGCCAAACCG
			50.474	0		24.9996	1.58984		1.02684e-55	1.96981e-53		Flavobacteriales	Flavobacterium	NA		ASV_595	GGTAGTCCACGCCGTAAACGATGGATACTAGCTGTTGGGCGCAAGTTCAGTGGCTAAGCGAAAGTGATAAGTATCCCACCTGGGGAGTACGTTCGCAAGAATGAAACTCAAAGGAATTGACGGGGGCCCGCACAAGCGGTGGAGCATGTGGTTTAATTCGATGATACGCGAGGAACCTTACCAAGGCTTAAATGTAGTTTGACCGGTTTGGAAACAGATCTTTCGCAAGACAAATTACAAGGTGCTGCATGGTTGTCGTCAGCTCGTGCCGTGAGGTGTCAGGTTAAGTCCTATAACGAGCGCAACCCCTGTTGTTAGTTGCCAGCGAGTCATGTCGGGAACTCTAACGAGACTGCCAGTGCAAACTGA
			38.544	0		24.6582	1.37291		3.97063e-72	1.5234e-69		Flavobacteriales	Chryseobacterium	NA		ASV_629	GGTAGTCCACGCCGTAAACGATGCTAACTCGTTTTTGGGGCTTTAAGCTTCAGAGACTAAGCGAAAGTGATAAGTTAGCCACCTGGGGAGTACGAACGCAAGTTTGAAACTCAAAGGAATTGACGGGGGCCCGCACAAGCGGTGGATTATGTGGTTTAATTCGATGATACGCGAGGAACCTTACCAAGGCTTAAATGGGAATTGACAGGTTTAGAAATAGACTTTTCTTCGGACAATTTTCAAGGTGCTGCATGGTTGTCGTCAGCTCGTGCCGTGAGGTGTTAGGTTAAGTCCTGCAACGAGCGCAACCCCTGTCACTAGTTGCTAGCATTAAGTTGAGGACTCTAGTGAGACTGCCTACGCAAGTAGA
			280.101	96.3103		1.54024	0.362016		2.09404e-05	0.000251067		Flavobacteriales	Chryseobacterium	NA		ASV_92	GGTAGTCCACGCCGTAAACGATGCTAACTCGTTTTTGGGTTTTCGGATTCAGAGACTAAGCGAAAGTGATAAGTTAGCCACCTGGGGAGTACGAACGCAAGTTTGAAACTCAAAGGAATTGACGGGGGCCCGCACAAGCGGTGGATTATGTGGTTTAATTCGATGATACGCGAGGAACCTTACCAAGGCTTAAATGGGAATTGACAGGTTTAGAAATAGACTTTTCTTCGGACAATTTTCAAGGTGCTGCATGGTTGTCGTCAGCTCGTGCCGTGAGGTGTTAGGTTAAGTCCTGCAACGAGCGCAACCCCTGTCACTAGTTGCTAGCATTAAGTTGAGGACTCTAGTGAGACTGCCTACGCAAGTAGA
			290.438	837.17		-1.52742	0.348871		1.1968e-05	0.000160177		Flavobacteriales	Flavobacterium	NA		ASV_14	GGTAGTCCACGCCGTAAACGATGGATACTAGCTGTTGGGCGCAAGTTCAGTGGCTAAGCGAAAGTGATAAGTATCCCACCTGGGGAGTACGTTCGCAAGAATGAAACTCAAAGGAATTGACGGGGGCCCGCACAAGCGGTGGAGCATGTGGTTTAATTCGATGATACGCGAGGAACCTTACCAAGGCTTAAATGTAGATTGACCGGTTTGGAAACAGATCTTTCGCAAGACAATTTACAAGGTGCTGCATGGTTGTCGTCAGCTCGTGCCGTGAGGTGTCAGGTTAAGTCCTATAACGAGCGCAACCCCTGTTGTTAGTTGCCAGCGAGTCAAGTCGGGAACTCTAACAAGACTGCCAGTGCAAACTGT
			217.134	636.31		-1.55113	0.331545		2.88977e-06	4.43483e-05		Flavobacteriales	Flavobacterium	NA		ASV_20	GGTAGTCCACGCCGTAAACGATGGATACTAGCTGTTGGAAGCAATTTCAGTGGCTAAGCGAAAGTGATAAGTATCCCACCTGGGGAGTACGTTCGCAAGAATGAAACTCAAAGGAATTGACGGGGGCCCGCACAAGCGGTGGAGCATGTGGTTTAATTCGATGATACGCGAGGAACCTTACCAAGGCTTAAATGTAGATTGACCGGTTTGGAAACAGATCTTTCGCAAGACAATTTACAAGGTGCTGCATGGTTGTCGTCAGCTCGTGCCGTGAGGTGTCAGGTTAAGTCCTATAACGAGCGCAACCCCTGTTGTTAGTTGCCAGCGAGTCAAGTCGGGAACTCTAACAAGACTGCCAGTGCAAACTGT
			91.01	306.737		-1.75193	0.412865		2.20218e-05	0.000259777		Flavobacteriales	Flavobacterium	NA		ASV_69	GGTAGTCCACGCCGTAAACGATGGATACTAGCTGTTGGGCGCAAGTTCAGTGGCTAAGCGAAAGTGATAAGTATCCCACCTGGGGAGTACGTTCGCAAGAATGAAACTCAAAGGAATTGACGGGGGCCCGCACAAGCGGTGGAGCATGTGGTTTAATTCGATGATACGCGAGGAACCTTACCAAGGCTTAAATGTAGATTGACCGGTTTGGAAACAGATCTTTCGCAAGACAATTTACAAGGTGCTGCATGGTTGTCGTCAGCTCGTGCCGTGAGGTGTCAGGTTAAGTCCTATAACGAGCGCAACCCCTGTTGTTAGTTGCCAGCGAGTCATGTCGGGAACTCTAACAAGACTGCCAGTGCAAACTGT
			108.58	572.696		-2.39895	0.454446		1.29997e-07	2.57977e-06		Flavobacteriales	Flavobacterium	NA		ASV_33	GGTAGTCCACGCCGTAAACGATGGATACTAGCTGTTGGGAGCAATCTCAGTGGCTAAGCGAAAGTGATAAGTATCCCACCTGGGGAGTACGTTCGCAAGAATGAAACTCAAAGGAATTGACGGGGGCCCGCACAAGCGGTGGAGCATGTGGTTTAATTCGATGATACGCGAGGAACCTTACCAAGGCTTAAATGTAGATTGACCGGTTTGGAAACAGATCTTTCGCAAGACAATTTACAAGGTGCTGCATGGTTGTCGTCAGCTCGTGCCGTGAGGTGTCAGGTTAAGTCCTATAACGAGCGCAACCCCTGTTGTTAGTTGCCAGCGAGTCATGTCGGGAACTCTAACAAGACTGCCAGTGCAAACTGT
			11.9299	84.4371		-2.81687	0.629132		7.5564e-06	0.000104788		Flavobacteriales	Flavobacterium	NA		ASV_272	GGTAGTCCACGCCGTAAACGATGGATACTAGCTGTTCGGAGCAATCTGAGTGGCTAAGCGAAAGTGATAAGTATCCCACCTGGGGAGTACGTTCGCAAGAATGAAACTCAAAGGAATTGACGGGGGCCCGCACAAGCGGTGGAGCATGTGGTTTAATTCGATGATACGCGAGGAACCTTACCAAGGCTTAAATGTAGATTGACAGGACTGGAAACAGTTTTTTCTTCGGACAATTTACAAGGTGCTGCATGGTTGTCGTCAGCTCGTGCCGTGAGGTGTCAGGTTAAGTCCTATAACGAGCGCAACCCCTGTTGTTAGTTGCCAGCGAGTCATGTCGGGAACTCTAGCAAGACTGCCAGTGCAAACTGT
			29.6609	252.704		-3.08915	0.70639		1.22468e-05	0.000160183		Flavobacteriales	Flavobacterium	resistens		ASV_103	GGTAGTCCACGCCGTAAACGATGGATACTAGCTGTTGGGGGCAACTTCAGTGGCTAAGCGAAAGTGATAAGTATCCCACCTGGGGAGTACGTTCGCAAGAATGAAACTCAAAGGAATTGACGGGGGCCCGCACAAGCGGTGGAGCATGTGGTTTAATTCGATGATACGCGAGGAACCTTACCAAGGCTTAAATGTAGATTGACCGGTTTGGAAACAGACTTTTCGCAAGACAATTTACAAGGTGCTGCATGGTTGTCGTCAGCTCGTGCCGTGAGGTGTCAGGTTAAGTCCTATAACGAGCGCAACCCCTGTTGTTAGTTGCCAGCGAGTCATGTCGGGAACTCTAACGAGACTGCCAGTGCAAACTGT
			75.3647	760.594		-3.33589	0.42758		6.10297e-15	2.12864e-13		Flavobacteriales	Flavobacterium	NA		ASV_30	GGTAGTCCACGCCGTAAACGATGGATACTAGCTGTTGGGAGCAATCTCAGTGGCTAAGCGAAAGTGATAAGTATCCCACCTGGGGAGTACGTTCGCAAGAATGAAACTCAAAGGAATTGACGGGGGCCCGCACAAGCGGTGGAGCATGTGGTTTAATTCGATGATACGCGAGGAACCTTACCAAGGCTTAAATGTAGATTGACCGGTTTGGAAACAGATCTTTCGCAAGACAATTTACAAGGTGCTGCATGGTTGTCGTCAGCTCGTGCCGTGAGGTGTCAGGTTAAGTCCTATAACGAGCGCAACCCCTGTTGTTAGTTGCCAGCGAGTCAAGTCGGGAACTCTAACAAGACTGCCAGTGCAAACTGT
			2.83613	32.7124		-3.51015	0.600484		5.04964e-09	1.09663e-07		Flavobacteriales	Fluviicola	NA		ASV_492	GGTAGTCCACGCCGTAAACTATCAATACTCGTTCTCAGCCCTTCAGGGGTTGGGGACCAAGCGAAAGTGATAAGTATTGCACCTGGGGAGTACGATCGCAAGGTTGAAACTCAAAGGAATTGACGGGGGCCCGCACAAGCGGTGGAGCATGTGGTTTAATTCGATGATACGCGAGGAACCTTACCAGGGCTTAAATGCAGAACGCATATAGTGGAAACATTATAGTCTTCGGACGGTCTGCAAGGTGCTGCATGGCTGTCGTCAGCTCGTGCCGTGAGGTGTTGGGTTAAGTCCCGCAACGAGCGCAACCCCTATCTTTAGTTGCCAGCGGATAATGCCGGGGACTCTAAAGAAACTGCCAGCGCAAGCTGA
			2.92778	37.0173		-3.64721	0.90687		5.77669e-05	0.000609997		Flavobacteriales	Flavobacterium	NA		ASV_581	GGTAGTCCACGCCGTAAACGATGGATACTAGCTGTTGGGAGCAATCTCAGTGGCTAAGCGAAAGTGATAAGTATCCCACCTGGGGAGTACGTTCGCAAGAATGAAACTCAAAGGAATTGACGGGGGCCCGCACAAGCGGTGGAGCATGTGGTTTAATTCGATGATACGCGAGGAACCTTACCAAGGCTTAAATGTAGATTGACCGGTTTGGAAACAGACTTTTCGCAAGACAATTTACAAGGTGCTGCATGGTTGTCGTCAGCTCGTGCCGTGAGGTGTCAGGTTAAGTCCTATAACGAGCGCAACCCCTGTTGTTAGTTGCCAGCGAGTCAAGTCGGGAACTCTAACAAGACTGCCAGTGCAAACTGT
			1.88301	36.4694		-4.26142	1.09428		9.8487e-05	0.000960665		Flavobacteriales	Flavobacterium	NA		ASV_552	GGTAGTCCACGCCGTAAACGATGGATACTAGCTGTTGGGCGCAAGTTCAGTGGCTAAGCGAAAGTGATAAGTATCCCACCTGGGGAGTACGTTCGCAAGAATGAAACTCAAAGGAATTGACGGGGGCCCGCACAAGCGGTGGAGCATGTGGTTTAATTCGATGATACGCGAGGAACCTTACCAAGGCTTAAATGTAGATTGACCGGTTTGGAAACAGACTTTTCGCAAGACAATTTACAAGGTGCTGCATGGTTGTCGTCAGCTCGTGCCGTGAGGTGTCAGGTTAAGTCCTATAACGAGCGCAACCCCTGTTGTTAGTTGCCAGCGAGTCATGTCGGGAACTCTAACAAGACTGCCAGTGCAAACTGT
			1.71802	34.3693		-4.30608	1.08204		6.90305e-05	0.000703134		Flavobacteriales	Flavobacterium	NA		ASV_591	GGTAGTCCACGCCGTAAACGATGGATACTAGCTGTTGGGAGCAATTTCAGTGGCTAAGCGAAAGTGATAAGTATCCCACCTGGGGAGTACGTTCGCAAGAATGAAACTCAAAGGAATTGACGGGGGCCCGCACAAGCGGTGGAGCATGTGGTTTAATTCGATGATACGCGAGGAACCTTACCAAGGCTTAAATGTAGACTGACCGGTTTGGAAACAGACTTTTCGCAAGACAGTTTACAAGGTGCTGCATGGTTGTCGTCAGCTCGTGCCGTGAGGTGTCAGGTTAAGTCCTATAACGAGCGCAACCCCTGTTGTTAGTTGCCAGCGAGTCATGTCGGGAACTCTAACGAGACTGCCAGTGCAAACTGT
			4.11615	106.794		-5.4328	1.34339		5.25236e-05	0.000559766		Flavobacteriales	Chryseobacterium	NA		ASV_288	GGTAGTCCACGCCGTAAACGATGCTAACTCGTTTTTGGGTTTTCGGATTCAGAGACTAAGCGAAAGTGATAAGTTAGCCACCTGGGGAGTACGTTCGCAAGAATGAAACTCAAAGGAATTGACGGGGGCCCGCACAAGCGGTGGATTATGTGGTTTAATTCGATGATACGCGAGGAACCTTACCAAGGCTTAAATGGGAATTGACAGGTTTAGAAATAGACTTTTCTTCGGACAATTTTCAAGGTGCTGCATGGTTGTCGTCAGCTCGTGCCGTGAGGTGTTAGGTTAAGTCCTGCAACGAGCGCAACCCCTGTCACTAGTTGCCATCATTCAGTTGGGGACTCTAGTGAGACTGCCTACGCAAGTAGA
			3.19992	156.475		-5.6014	0.842432		2.94939e-11	8.08273e-10		Flavobacteriales	Flavobacterium	NA		ASV_179	GGTAGTCCACGCCGTAAACGATGGATACTAGCTGTTGGGCGCAAGTTCAGTGGCTAAGCGAAAGTGATAAGTATCCCACCTGGGGAGTACGTTCGCAAGAATGAAACTCAAAGGAATTGACGGGGGCCCGCACAAGCGGTGGAGCATGTGGTTTAATTCGATGATACGCGAGGAACCTTACCAAGGCTTAAATGTAGATTGACCGGTTTGGAAACAGACTTTTCGCAAGACAATTTACAAGGTGCTGCATGGTTGTCGTCAGCTCGTGCCGTGAGGTGTCAGGTTAAGTCCTATAACGAGCGCAACCCCTGTTGTTAGTTGCCAGCGAGTCAAGTCGGGAACTCTAACAAGACTGCCAGTGCAAACTGT
			0.505592	40.1233		-6.1223	1.23813		7.62175e-07	1.29009e-05		Flavobacteriales	Flavobacterium	NA		ASV_543	GGTAGTCCACGCCGTAAACGATGGATACTAGCTGTTGGGCGCAAGTTCAGTGGCTAAGCGAAAGTGATAAGTATCCCACCTGGGGAGTACGTTCGCAAGAATGAAACTCAAAGGAATTGACGGGGGCCCGCACAAGCGGTGGAGCATGTGGTTTAATTCGATGATACGCGAGGAACCTTACCAAGGCTTAAATGTAGACTGACCGGTTTGGAAACAGACTTTTCGCAAGACAGTTTACAAGGTGCTGCATGGTTGTCGTCAGCTCGTGCCGTGAGGTGTCAGGTTAAGTCCTATAACGAGCGCAACCCCTGTTGTTAGTTGCCAGCGAGTCATGTCGGGAACTCTAACGAGACTGCCAGTGCAAACTGT
			0.575328	43.7147		-23.9499	2.51171		1.49471e-21	8.19245e-20		Flavobacteriales	Flavobacterium	soli		ASV_510	GGTAGTCCACGCCGTAAACGATGGATACTAGCTGTTGGGAGCAATCTCAGTGGCTAAGCGAAAGTGATAAGTATCCCACCTGGGGAGTACGAACGCAAGTTTGAAACTCAAAGGAATTGACGGGGGCCCGCACAAGCGGTGGAGCATGTGGTTTAATTCGATGATACGCGAGGAACCTTACCAAGGCTTAAATGTAGATTGACCGGTTTGGAAACAGATCTTTCGCAAGACAATTTACAAGGTGCTGCATGGTTGTCGTCAGCTCGTGCCGTGAGGTGTCAGGTTAAGTCCTATAACGAGCGCAACCCCTGTTGTTAGTTGCCAGCGAGTCATGTCGGGAACTCTAACAAGACTGCCAGTGCAAACTGT
			0	27.9102		-24.7281	1.46275		4.12123e-64	9.48706e-62		Flavobacteriales	Flavobacterium	terrigena		ASV_556	GGTAGTCCACGCCGTAAACGATGGATACTAGCTGTTCGGAGCAATCTGAGTGGCTAAGCGAAAGTGATAAGTATCCCACCTGGGGAGTACGTTCGCAAGAATGAAACTCAAAGGAATTGACGGGGGCCCGCACAAGCGGTGGAGCATGTGGTTTAATTCGATGATACGCGAGGAACCTTACCAAGGCTTAAATGGGAAACGACAGGTTTGGAAACAGACTTTTCTTCGGACGTTTTTCAAGGTGCTGCATGGTTGTCGTCAGCTCGTGCCGTGAGGTGTCAGGTTAAGTCCTATAACGAGCGCAACCCCTGTCGTTAGTTGCCAGCGAGTCATGTCGGGAACTCTAACGAGACTGCCAGTGTAAACTGT
			0.118247	19.4978		-6.23247	0.710791		1.81271e-18	8.02471e-17		Diplorickettsiales	Aquicella	NA		ASV_848	GGTAGTCCACGCTGTAAACGATGAGAACTAAATGTTGGAAGGGGAACCTTTCAGTATTGAAGCTAACGCGATAAGTTCTCCGCCTGGGAAGTACAGTCGCAAGACTGAAACTCAAAAGAATTGACGGGGGCCCGCACAAGCGGTGGAGCATGTGGTTTAATTCGATGCAACGCGAAGAACCTTACCTACCCTTGACATCCTGCGAATCCCGATGAAAGTTGGGAGTGCCGCAAGGAACGCAGAGACAGGTGCTGCATGGCTGTCGTCAGCTCGTGTTGTGAGATGTTGGGTTAAGTCCCGTAACGAGCGCAACCCTTGTCCTTAGTTGCCATCATTTAGTTGGGGACTCTAAGGAGACCGCCAGTGATGAACTG
			1.71646	25.2499		-3.86346	0.973707		7.25425e-05	0.000732425		Cytophagales	Emticicia	NA		ASV_691	GGTAGTCCGCACAGTAAACGATGATTACTAGTTGTTGGCGAATAGTCAGTGACCAAGGGAAACCGATAAGTAATCCACCTGGGGAGTACGCCGGCAACGGTGAAACTCAAAGGAATTGACGGGGGTCCGCACAAGCGGTGGAGCATGTGGTTTAATTCGATGATACGCGAGGAACCTTACCTGGACTAGAATGTGAGGGAATTATTCAGAAATGGATAAGCCAGCAATGGCCCAAAACAAGGTGCTGCATGGCTGTCGTCAGTTCGTGCCGTGAGGTGTTGGGTTAAGTCCCGCAACGAACGCAACCCCTGTTGTCTGTTGCCATCAAGTAAAGTTGGGGACTCAGACAAGACTGCCTACGCAAGTAGA
			0.516145	28.959		-5.60868	0.803198		2.89087e-12	8.75629e-11		Cytophagales	Cytophaga	NA		ASV_564	GGTAGTCCGCACCGTAAACGATGATCACTCGCTGTGTGCGATAAACAGTACGCGGCCAAGCGAAAGCGATAAGTGATCCACCTGGGGAGTACGCCCGCAAGGGTGAAACTCAAAGGAATTGACGGGGGTCCGCACAAGCGGTGGAGCATGTGGTTTAATTCGATGATACGCGAGGAACCTTACCTAGGCTAGAATGTGAAGGAATGTATCAGAAATGGTGCAGTCAGCAATGACCTGAAACAAGGTGCTGCATGGCTGTCGTCAGCTCGTGCCGTGAGGTGTTGGGTTAAGTCCCGCAACGAGCGCAACCCCTATCTTTAGTTGCCAGCGGGTTAAGCCGGGGACTCTAGAGAGACTGCCTGTGTAAACAGA
			0	54.4669		-8.07496	0.994334		4.62468e-16	1.66344e-14		Cytophagales	Emticicia	NA		ASV_458	GGTAGTCCGCACAGTAAACGATGATTACTAGATGTTTGCGAAAGTAAGTGTCCAAGGGAAACCGATAAGTAATCCACCTGGGGAGTACGCCGGCAACGGTGAAACTCAAAGGAATTGACGGGGGTCCGCACAAGCGGTGGAGCATGTGGTTTAATTCGATGATACGCGAGGAACCTTACCTGGACTAGAATGTGAGGGAATGTATTAGAAATAGTACAGTCAGCAATGACCCGAAACAAGGTGCTGCATGGCTGTCGTCAGTTCGTGCCGTGAGGTGTTGGGTTAAGTCCCGCAACGAACGCAACCCCTGTTGTCTGTTGCCAGCGAGTTAAGTCGGGGACTCAGACAAGACTGCCTACGCAAGTAGA
			0	257.936		-10.3186	0.596871		5.81075e-67	1.67204e-64		Cytophagales	Lacihabitans	NA		ASV_120	GGTAGTCCACGCCGTAAACGATGATTACTAGTTGTTGGGGTTTAAGCCTCAGTGACCAAGGGAAACCGATAAGTAATCCACCTGGGGAGTACGCCGGCAACGGTGAAACTCAAAGGAATTGACGGGGGTCCGCACAAGCGGTGGAGCATGTGGTTTAATTCGATGATACGCGAGGAACCTTACCTAGGCTAGAATGTGAGCGAAGTAATCAGAGATGGTTACGTCAGCAATGACGCGAAACAAGGTGCTGCATGGCCGTCGTCAGTTCGTGCCGTGAGGTGTTGGGTTAAGTCCCGCAACGAACGCAACCCCTATAATCTGTTGCCAGCATGTGATGATGGGGACTCAGGTTAGACTGCCTACGCAAGTAGA
			0	493.582		-26.401	1.94418		5.29935e-42	7.62444e-40		Clostridiales	Lachnoclostridium_5	NA		ASV_50	GGTAGTCCACGCCGTAAACGATGAATACTAGGTGTCGGGGAGCAAAGCTCTTCGGTGCCGTCGCTAACGCAATAAGTATTCCACCTGGGGAGTACGTTCGCAAGAATGAAACTCAAAGGAATTGACGGGGACCCGCACAAGCGGTGGAGCATGTGGTTTAATTCGAAGCAACGCGAAGAACCTTACCAAGTCTTGACATCGGAATGACAGCCTTATAACTAAGGTCTCCCTACGGGGCATTCTAGACAGGTGGTGCATGGTTGTCGTCAGCTCGTGTCGTGAGATGTTGGGTTAAGTCCCGCAACGAGCGCAACCCTTATCCTTAGTAGCCAGCAGTTCGGCTGGGCACTCTGGGGAGACTGCCAGGGATAACCTG
			140.15	70.8621		0.984905	0.252889		9.83537e-05	0.000960665		Caulobacterales	Asticcacaulis	NA		ASV_134	GGTAGTCCACGCTGTAAACGATGATTGCTAGTTGTCGGACGGCATGCCGTTCGGTGACGCAGCTAACGCATTAAGCAATCCGCCTGGGGAGTACGGTCGCAAGATTAAAACTCAAAGGAATTGACGGGGGCCCGCACAAGCGGTGGAGCATGTGGTTTAATTCGAAGCAACGCGCAGAACCTTACCACCTTTTGACATGCCTGGACAAACCGAGAGATCGGTCTTTCCCTTCGGGGACTGGGACACAGGTGCTGCATGGCTGTCGTCAGCTCGTGTCGTGAGATGTTGGGTTAAGTCCCGCAACGAGCGCAACCCTCGCTGTTAGTTGCCATCATTTAGTTGGGAACTCTAACAGGACTGCCGGTGCTAAGCCG
			25.648	99.6871		-1.95397	0.384632		3.77245e-07	6.89221e-06		Caulobacterales	Asticcacaulis	benevestitus		ASV_214	GGTAGTCCACGCTGTAAACGATGATTGCTAGTTGTCGGACGGCATGCCGTTCGGTGACGCAGCTAACGCATTAAGCAATCCGCCTGGGGAGTACGGTCGCAAGATTAAAACTCAAAGGAATTGACGGGGGCCCGCACAAGCGGTGGAGCATGTGGTTTAATTCGAAGCAACGCGCAGAACCTTACCACCTTTTGACATGCCTGGACATCATGGGAGACCATGCTTTCTCTTCGGAGACTGGGACACAGGTGCTGCATGGCTGTCGTCAGCTCGTGTCGTGAGATGTTGGGTTAAGTCCCGCAACGAGCGCAACCCTCGCTGTTAGTTGCCATCATTAAGTTGGGAACTCTAACAGGACTGCCGGTGCTAAGCCG
			1.274	17.9279		-3.78414	0.865166		1.22051e-05	0.000160183		Caulobacterales	NA	NA		ASV_924	GGTAGTCCACGCTGTAAACGATGAGTGCTAGTTGTCGGCATGCATGCATGTCGGTGACGCAGCTAACGCATTAAGCACTCCGCCTGGGGAGTACGGTCGCAAGATTAAAACTCAAAGGAATTGACGGGGGCCCGCACAAGCGGTGGAGCATGTGGTTTAATTCGAAGCAACGCGCAGAACCTTACCACCTTTTGACATGCCTGGACCGGTGCAGAGATGCACCTTTCCCTTCGGGGACTAGGACACAGGTGCTGCATGGCTGTCGTCAGCTCGTGTCGTGAGATGTTGGGTTAAGTCCCGCAACGAGCGCAACCCTCGCCTTTAGTTGCCATCATTTAGTTGGGCACTCTAAAGGGACCGCCGGTGGTAAGCCG
			0.343803	12.1713		-4.73998	0.906635		1.71257e-07	3.34096e-06		Caulobacterales	Asticcacaulis	NA		ASV_1128	GGTAGTCCACGCTGTAAACGATGATTGCTAGTTGTCAGCCGGCATGCCGGTTGGTGACGCAGCTAACGCATTAAGCAATCCGCCTGGGGAGTACGGTCGCAAGATTAAAACTCAAAGGAATTGACGGGGGCCCGCACAAGCGGTGGAGCATGTGGTTTAATTCGAAGCAACGCGCAGAACCTTACCACCTTTTGACATGCCTGGACATCATGGGAGACCATGCTTTCTCTTCGGAGACTGGGACACAGGTGCTGCATGGCTGTCGTCAGCTCGTGTCGTGAGATGTTGGGTTAAGTCCCGCAACGAGCGCAACCCTCGCTGTTAGTTGCCATCATTAAGTTGGGAACTCTAACAGGACTGCCGGTGCTAAGCCG
			0	17.3586		-6.42568	1.0145		2.3916e-10	5.85688e-09		Caulobacterales	Asticcacaulis	NA		ASV_664	GGTAGTCCACGCCGTAAACGATGATTGCTAGTTGTCAGCCGGCATGCCGGTTGGTGACGCAGCTAACGCATTAAGCAATCCGCCTGGGGAGTACGGTCGCAAGATTAAAACTCAAAGGAATTGACGGGGGCCCGCACAAGCGGTGGAGCATGTGGTTTAATTCGAAGCAACGCGCAGAACCTTACCACCTTTTGACATGCCTGGACATCCCGAGAGATCGGGCTTTCCCTTCGGGGACTGGGACACAGGTGCTGCATGGCTGTCGTCAGCTCGTGTCGTGAGATGTTGGGTTAAGTCCCGCAACGAGCGCAACCCTCGCTGTTAGTTGCCATCATTTAGTTGGGAACTCTAACAGGACTGCCGGTGCTAAGCCG
			78.4292	3.09956		4.66445	0.920856		4.07663e-07	7.33157e-06		Catenulisporales	Catenulispora	NA		ASV_331	GGTAGTCCACGCCGTAAACGTTGGGAACTAGGTGTGGGGTCCATTCCACGGGCTCTGTGCCGCAGCTAACGCATTAAGTTCCCCGCCTGGGGAGTACGGCCGCAAGGCTAAAACTCAAAGGAATTGACGGGGGCCCGCACAAGCGGCGGAGCATGTGGCTTAATTCGATGCAACGCGAAGAACCTTACCTGGGCTTGACATGTTCGGTCTACCTGCAGAGATGTGGGGTGCTTTTGCGCCGTTCACAGGTGGTGCATGGTTGTCGTCAGCTCGTGTCGTGAGATGTTGGGTTAAGTCCCGCAACGAGCGCAACCCTCGTTCCATGTTGCCAGCGCGTTATGGCGGGGACTCATGGGAGACTGCCGGGGTCAACTCG
			59.5396	22.6298		1.39631	0.33735		3.48764e-05	0.000393556		C0119	NA	NA		ASV_353	GTTAGTCCTAGCAGTAAACGATGGCTACTAGGTGTGGGGGGTGTTGACCCCTCCTGTGCCGAAGCTAACGCATTAAGTAGCCCGCCTGGGGAGTACGGTCGCAAGACTAAAACTCAAAGGAATTGACGGGGACCCGCACAAGCAGCGGAGCGTGTGGTTTAATTCGATGCAACGCGAAGAACCTTACCTGGGCTTGACATCTATTTGCAACACTCTGAAAGGGGTGCCTCCTTCGGGACAGATAGACAGATGCTGCATGGCTGTCGTCAGCTCGTGTCGTGAGATGTTGGGTTAAGTCCCGCAACGAGCGCAACCCTTGTCCTTAGTTGCATATCTAAGGAGACTGCCGGTACAAAACCG
			47.3841	0		24.9863	2.56801		2.24957e-22	1.36479e-20		Betaproteobacteriales	NA	NA		ASV_588	GGTAGTCCACGCCCTAAACGATGTCTACTAGTTGTCGGGTCTTAATTGACTTGGTAACGCAGCTAACGCGTGAAGTAGACCGCCTGGGGAGTACGGTCGCAAGATTAAAACTCAAAGGAATTGACGGGGACCCGCACAAGCGGTGGATGATGTGGATTAATTCGATGCAACGCGAAAAACCTTACCTACCCTTGACATGTACGGAACCCTCGAGAGATTGAGGGGTGCTCGAAAGAGAGCCGTAACACAGGTGCTGCATGGCTGTCGTCAGCTCGTGTCGTGAGATGTTGGGTTAAGTCCCGCAACGAGCGCAACCCTTGTCATTAGTTGCTACGCAAGAGCACTCTAATGAGACTGCCGGTGACAAACCG
			65.5494	0		24.801	2.87907		7.0405e-18	2.89415e-16		Betaproteobacteriales	NA	NA		ASV_460	GGTAGTCCACGCCCTAAACGATGTCTACTAGTTGTCGGGTCTTAATTGACTTGGTAACGCAGCTAACGCGTGAAGTAGACCGCCTGGGGAGTACGGTCGCAAGATTAAAACTCAAAGGAATTGACGGGGACCCGCACAAGCGGTGGATGATGTGGATTAATTCGATGCAACGCGAAAAACCTTACCTACCCTTGACATGTACGGAACCCTCGAGAGATCGGGGGGTGCTCGAAAGAGAGCCGTAACACAGGTGCTGCATGGCTGTCGTCAGCTCGTGTCGTGAGATGTTGGGTTAAGTCCCGCAACGAGCGCAACCCTTGTCATTAGTTGCTACGCAAGAGCACTCTAATGAGACTGCCGGTGACAAACCG
			156.337	1.75433		24.6425	2.86347		7.57696e-18	3.00727e-16		Betaproteobacteriales	NA	NA		ASV_241	GGTAGTCCACGCCCTAAACGATGTCTACTAGTTGTCGGGTCTTAATTGACTTGGTAACGCAGCTAACGCGTGAAGTAGACCGCCTGGGGAGTACGGTCGCAAGATTAAAACTCAAAGGAATTGACGGGGACCCGCACAAGCGGTGGATGATGTGGATTAATTCGATGCAACGCGAAAAACCTTACCTACCCTTGACATGTACGGAACCTTTGAGAGATCAGAGGGTGCTCGAAAGAGAGCCGTAACACAGGTGCTGCATGGCTGTCGTCAGCTCGTGTCGTGAGATGTTGGGTTAAGTCCCGCAACGAGCGCAACCCTTGTCATTAGTTGCTACGCAAGAGCACTCTAATGAGACTGCCGGTGACAAACCG
			336.403	5.53178		5.92746	0.794402		8.55172e-14	2.8123e-12		Betaproteobacteriales	NA	NA		ASV_113	GGTAGTCCACGCCCTAAACGATGTCAACTAGTTGTTGGGGATTCATTTCCTTAGTAACGAAGCTAACGCGTGAAGTTGACCGCCTGGGGAGTACGGTCGCAAGATTAAAACTCAAAGGAATTGACGGGGACCCGCACAAGCGGTGGATGATGTGGATTAATTCGATGCAACGCGAAAAACCTTACCTACCCTTGACATGGACGGAATCCTGCTGAGAAGTGGGAGTGCTCGAAAGAGAACCGTCGCACAGGTGCTGCATGGCTGTCGTCAGCTCGTGTCGTGAGATGTTGGGTTAAGTCCCGCAACGAGCGCAACCCTTGTCCTTAGTTGCTACGCAAGAGCACTCTAAGGAGACTGCCGGTGACAAACCG
			423.166	184.08		1.20138	0.247199		1.17406e-06	1.95847e-05		Betaproteobacteriales	Variovorax	NA		ASV_45	GGTAGTCCACGCCCTAAACGATGTCAACTGGTTGTTGGGTCTTCACTGACTCAGTAACGAAGCTAACGCGTGAAGTTGACCGCCTGGGGAGTACGGCCGCAAGGTTGAAACTCAAAGGAATTGACGGGGACCCGCACAAGCGGTGGATGATGTGGTTTAATTCGATGCAACGCGAAAAACCTTACCCACCTTTGACATGTACGGAATTCGCCAGAGATGGCTTAGTGCTCGAAAGAGAACCGTAACACAGGTGCTGCATGGCTGTCGTCAGCTCGTGTCGTGAGATGTTGGGTTAAGTCCCGCAACGAGCGCAACCCTTGTCATTAGTTGCTACATTTAGTTGGGCACTCTAATGAGACTGCCGGTGACAAACCG
			1535.56	674.205		1.18735	0.186272		1.83856e-10	4.60039e-09		Betaproteobacteriales	Variovorax	NA		ASV_8	GGTAGTCCACGCCCTAAACGATGTCAACTGGTTGTTGGGTCTTCACTGACTCAGTAACGAAGCTAACGCGTGAAGTTGACCGCCTGGGGAGTACGGCCGCAAGGTTGAAACTCAAAGGAATTGACGGGGACCCGCACAAGCGGTGGATGATGTGGTTTAATTCGATGCAACGCGAAAAACCTTACCCACCTTTGACATGTACGGAATTCGCCAGAGATGGCTTAGTGCTCGAAAGAGAACCGTAACACAGGTGCTGCATGGCTGTCGTCAGCTCGTGTCGTGAGATGTTGGGTTAAGTCCCGCAACGAGCGCAACCCTTGTCATTAGTTGCTACATTCAGTTGGGCACTCTAATGAGACTGCCGGTGACAAACCG
			20.4609	116.905		-2.51111	0.580283		1.50893e-05	0.000195126		Betaproteobacteriales	NA	NA		ASV_221	GGTAGTCCACGCCCTAAACGATGTCTACTAGTTGTTGGGAGAGTAAAATCTCTTAGTAACGCAGCTAACGCGTGAAGTAGACCGCCTGGGGAGTACGGTCGCAAGATTAAAACTCAAAGGAATTGACGGGGGCCCGCACAAGCGGTGGATTATGTGGATTAATTCGATGCAACGCGAAAAACCTTACCTGGCCTTGACATGCTACTAACGAAGCAGAGATGCATTAGGTGCCCGAAAGGGAAAGTAGACACAGGTGCTGCATGGCTGTCGTCAGCTCGTGTCGTGAGATGTTGGGTTAAGTCCCGCAACGAGCGCAACCCTTGCCAATAATTGCCATCATTTAGTTGGGCACTTTATTGGGACTGCCGGTGACAAACCG
			53.0619	341.622		-2.68425	0.250313		7.8881e-27	6.48514e-25		Betaproteobacteriales	Methylotenera	versatilis		ASV_48	GGTAGTCCACGCCCTAAACGATGTCTACTAGTTGTTGGTGGAGTAAAATCCATGAGTAACGCAGCTAACGCGTGAAGTAGACCGCCTGGGGAGTACGGTCGCAAGATTAAAACTCAAATGAATTGACGGGGGCCCGCACAAGCGGTGGATTATGTGGATTAATTCGATGCAACGCGAAAAACCTTACCTGGCCTTGACATGTAACGAACTTTCCAGAGATGGATTGGTGCTCGAAAGAGAACGTTAACACAGGTGCTGCATGGCTGTCGTCAGCTCGTGTCGTGAGATGTTGGGTTAAGTCCCGCAACGAGCGCAACCCTTGCCATTAATTGCCATCATTTAGTTGGGCACTTTAATGGGACTGCCGGTGACAAACCG
			11.2649	110.836		-3.29567	0.508548		9.13897e-11	2.33754e-09		Betaproteobacteriales	NA	NA		ASV_226	GGTAGTCCACGCCCTAAACGATGTCTACTAGTTGTTGGTGGAGTAAAATCCATGAGTAACGCAGCTAACGCGTGAAGTAGACCGCCTGGGGAGTACGGTCGCAAGATTAAAACTCAAATGAATTGACGGGGGCCCGCACAAGCGGTGGATTATGTGGATTAATTCGATGCAACGCGAAAAACCTTACCTGGCCTTGACATGTACCGAATTTACCAGAGATGGTTTAGTGCTCGAAAGAGAACGGTAACACAGGTGCTGCATGGCTGTCGTCAGCTCGTGTCGTGAGATGTTGGGTTAAGTCCCGCAACGAGCGCAACCCTTGCCATTAATTGCCATCATTTAGTTGGGCACTTTAATGGGACTGCCGGTGACAAACCG
			4.06506	78.5695		-4.25831	0.675937		2.97913e-10	7.1437e-09		Betaproteobacteriales	Limnohabitans	NA		ASV_299	GGTAGTCCACGCCCTAAACGATGTCAACTGGTTGTTGGGTCTTCACTGACTCAGTAACGAAGCTAACGCGTGAAGTTGACCGCCTGGGGAGTACGGCCGCAAGGTTGAAACTCAAAGGAATTGACGGGGACCCGCACAAGCGGTGGATGATGTGGTTTAATTCGATGCAACGCGAAAAACCTTACCCACCTTTGACATGTACGGAAGTCGCTAGAGATAGCTTCGTGCTCGAAAGAGAGCCGTAACACAGGTGCTGCATGGCTGTCGTCAGCTCGTGTCGTGAGATGTTGGGTTAAGTCCCGCAACGAGCGCAACCCTTGTCATTAGTTGCTACATTTAGTTGGGCACTCTAATGAGACTGCCGGTGACAAACCG
			0	5.98665		-4.89017	1.16038		2.50551e-05	0.000291297		Betaproteobacteriales	NA	NA		ASV_1751	GGTAGTCCACGCCCTAAACGATGTCAACTGGTTGTTGGGTCTTCACTGACTCAGTAACGAAGCTAACGCGTGAAGTTGACCGCCTGGGGAGTACGGCCGCAAGGTTGAAACTCAAAGGAATTGACGGGGACCCGCACAAGCGGTGGATGATGTGGTTTAATTCGATGCAACGCGAAAAACCTTACCCACCTTTGACATGTACGGAATTTGCCAGAGATGGCTTAGTGCTCGAAAGAGAACCGTAACACAGGTGCTGCATGGCTGTCGTCAGCTCGTGTCGTGAGATGTTGGGTTAAGTCCCGCAACGAGCGCAACCCTTGTCATTAGTTGCTACGAAAGGGCACTCTAATGAGACTGCCGGTGACAAACCG
			7.46501	263.236		-5.13441	0.763247		1.73123e-11	4.86012e-10		Betaproteobacteriales	NA	NA		ASV_98	GGTAGTCCACGCCCTAAACGATGTCAACTGGTTGTTGGGTCTTCACTGACTCAGTAACGAAGCTAACGCGTGAAGTTGACCGCCTGGGGAGTACGGCCGCAAGGTTGAAACTCAAAGGAATTGACGGGGACCCGCACAAGCGGTGGATGATGTGGTTTAATTCGATGCAACGCGAAAAACCTTACCCACCTTTGACATGTACGGAATCCTTTAGAGATAGAGGAGTGCTCGAAAGAGAACCGTAACACAGGTGCTGCATGGCTGTCGTCAGCTCGTGTCGTGAGATGTTGGGTTAAGTCCCGCAACGAGCGCAACCCTTGTCATTAGTTGCTACATTTAGTTGGGCACTCTAATGAGACTGCCGGTGACAAACCG
			1.66087	75.7307		-5.46181	1.05658		2.34943e-07	4.4331e-06		Betaproteobacteriales	NA	NA		ASV_281	GGTAGTCCACGCCCTAAACGATGTCAACTGGTTGTTGGGTCTTCACTGACTCAGTAACGAAGCTAACGCGTGAAGTTGACCGCCTGGGGAGTACGGCCGCAAGGTTGAAACTCAAAGGAATTGACGGGGACCCGCACAAGCGGTGGATGATGTGGTTTAATTCGATGCAACGCGAAAAACCTTACCCACCTTTGACATGTACGGAATTTGCCAGAGATGGCTTAGTGCTCGAAAGAGAACCGTAACACAGGTGCTGCATGGCTGTCGTCAGCTCGTGTCGTGAGATGTTGGGTTAAGTCCCGCAACGAGCGCAACCCTTGTCATTAGTTGCTACATTTAGTTGGGCACTCTAATGAGACTGCCGGTGACAAACCG
			0	12.6565		-5.96974	1.44479		3.5978e-05	0.000402046		Betaproteobacteriales	Massilia	NA		ASV_829	GGTAGTCCACGCCCTAAACGATGTCTACTAGTTGTCGGGTTTTAATTAACTTGGTAACGCAGCTAACGCGTGAAGTAGACCGCCTGGGGAGTACGGTCGCAAGATTAAAACTCAAAGGAATTGACGGGGACCCGCACAAGCGGTGGATGATGTGGATTAATTCGATGCAACGCGAAAAACCTTACCTACCCTTGACATGTACGGAAGCTTGGAGAGATCTGAGTGTGCTCGAAAGAGAGCCGTAACACAGGTGCTGCATGGCTGTCGTCAGCTCGTGTCGTGAGATGTTGGGTTAAGTCCCGCAACGAGCGCAACCCTTGTCATTAGTTGCTACGAAAGGGCACTCTAATGAGACTGCCGGTGACAAACCG
			0	15.5356		-6.26563	1.45689		1.70272e-05	0.000215366		Betaproteobacteriales	NA	NA		ASV_855	GGTAGTCCACGCCCTAAACGATGTCTACTAGTTGTCGGGTCTTAATTGACTTGGTAACGCAGCTAACGCGTGAAGTAGACCGCCTGGGGAGTACGGTCGCAAGATTAAAACTCAAAGGAATTGACGGGGACCCGCACAAGCGGTGGATGATGTGGATTAATTCGATGCAACGCGAAAAACCTTACCTACCCTTGACATGTACGGAATTCTGCTGAGAGGTGGAAGTGCTCGAAAGAGAACCGTAACACAGGTGCTGCATGGCTGTCGTCAGCTCGTGTCGTGAGATGTTGGGTTAAGTCCCGCAACGAGCGCAACCCTTGTCATTAGTTGCTACGAAAGGGCACTCTAATGAGACTGCCGGTGACAAACCG
			0.212844	24.7992		-6.28599	0.693534		1.26085e-19	6.30972e-18		Betaproteobacteriales	NA	NA		ASV_748	GGTAGTCCACGCCCTAAACGATGTCTACTAGTTGTCGGGACTTAATTGTCTTGGTAACGCAGCTAACGCGTGAAGTAGACCGCCTGGGGAGTACGGTCGCAAGATTAAAACTCAAAGGAATTGACGGGGACCCGCACAAGCGGTGGATGATGTGGATTAATTCGATGCAACGCGAAAAACCTTACCTACCCTTGACATGGTTCGAATCTCGTAGAGATATGAGAGTGCTCGCAAGAGAACGGATACACAGGTGCTGCATGGCTGTCGTCAGCTCGTGTCGTGAGATGTTGGGTTAAGTCCCGCAACGAGCGCAACCCTTGTCATTAATTGCCATCATTCAGTTGGGCACTTTAATGAGACTGCCGGTGACAAACCG
			0	23.3524		-6.85338	0.922006		1.06066e-13	3.39116e-12		Betaproteobacteriales	Massilia	NA		ASV_624	GGTAGTCCACGCCCTAAACGATGTCTACTAGTTGTCGGGTTTTAATTAACTTGGTAACGCAGCTAACGCGTGAAGTAGACCGCCTGGGGAGTACGGTCGCAAGATTAAAACTCAAAGGAATTGACGGGGACCCGCACAAGCGGTGGATGATGTGGATTAATTCGATGCAACGCGAAAAACCTTACCTACCCTTGACATGTACGGAATCCTGGAGAGATCTGGGAGTGCTCGAAAGAGAGCCGTAACACAGGTGCTGCATGGCTGTCGTCAGCTCGTGTCGTGAGATGTTGGGTTAAGTCCCGCAACGAGCGCAACCCTTGTCATTAGTTGCTACGAAAGGGCACTCTAATGAGACTGCCGGTGACAAACCG
			0	32.6416		-7.33632	0.762534		6.52118e-22	3.75294e-20		Betaproteobacteriales	Methylotenera	NA		ASV_568	GGTAGTCCACGCCCTAAACGATGTCAACTAGTTGTTGGTAGAGTAAAATCTATGAGTAACGCAGCTAACGCGTGAAGTTGACCGCCTGGGGAGTACGATCGCAAGATTAAAACTCAAATGAATTGACGGGGGCCCGCACAAGCGGTGGATTATGTGGATTAATTCGATGCAACGCGAAAAACCTTACCTGGCCTTGACATGTACCGAATTTGGGAGAGATTCCTTAGTGCTCGAAAGAGAGCGGTAACACAGGTGCTGCATGGCTGTCGTCAGCTCGTGTCGTGAGATGTTGGGTTAAGTCCCGCAACGAGCGCAACCCTTGCCAATAATTGCCATCATTTAGTTGGGCACTTTATTGGGACTGCCGATGACAAATCG
			0	33.4202		-7.3704	0.842899		2.24786e-18	9.58254e-17		Betaproteobacteriales	Pelomonas	puraquae		ASV_593	GGTAGTCCACGCCCTAAACGATGTCAACTGGTTGTTGGGAGGGTTTCTTCTCAGTAACGAAGCTAACGCGTGAAGTTGACCGCCTGGGGAGTACGGCCGCAAGGTTGAAACTCAAAGGAATTGACGGGGACCCGCACAAGCGGTGGATGATGTGGTTTAATTCGATGCAACGCGAAAAACCTTACCTACCCTTGACATGTCTGGAATTCCGAAGAGATTTGGAAGTGCTCGAAAGAGAGCCAGAACACAGGTGCTGCATGGCCGTCGTCAGCTCGTGTCGTGAGATGTTGGGTTAAGTCCCGCAACGAGCGCAACCCTTGTCATTAGTTGCTACGAAAGGGCACTCTAATGAGACTGCCGGTGACAAACCG
			0.365565	151.591		-8.3215	0.695155		5.05972e-33	4.47979e-31		Betaproteobacteriales	Actimicrobium	NA		ASV_27	GGTAGTCCACGCCCTAAACGATGTCTACTAGTTGTCGGGTCTTAATTGACTTGGTAACGCAGCTAACGCGTGAAGTAGACCGCCTGGGGAGTACGGTCGCAAGATTAAAACTCAAAGGAATTGACGGGGACCCGCACAAGCGGTGGATGATGTGGATTAATTCGATGCAACGCGAAAAACCTTACCTACCCTTGACATGGTCGGAATTCTGCCGAGAGGCGGAAGTGCTCGAAAGAGAGCCGATACACAGGTGCTGCATGGCTGTCGTCAGCTCGTGTCGTGAGATGTTGGGTTAAGTCCCGCAACGAGCGCAACCCTTGTCATTAGTTGCTACGAAAGGGCACTCTAATGAGACTGCCGGTGACAAACCG
			0	92.4517		-8.83861	0.658217		4.1388e-41	5.29307e-39		Betaproteobacteriales	Rhizobacter	NA		ASV_248	GGTAGTCCACGCCCTAAACGATGTCAACTGGTTGTTGGACGGCTTGCTGTTCAGTAACGAAGCTAACGCGTGAAGTTGACCGCCTGGGGAGTACGGCCGCAAGGTTGAAACTCAAAGGAATTGACGGGGACCCGCACAAGCGGTGGATGATGTGGTTTAATTCGATGCAACGCGAAAAACCTTACCTACCCTTGACATGTCTAGAATCCCGAAGAGATTTGGGAGTGCTCGAAAGAGAACTAGAACACAGGTGCTGCATGGCCGTCGTCAGCTCGTGTCGTGAGATGTTGGGTTAAGTCCCGCAACGAGCGCAACCCTTATCATTAGTTGCTACGCAAGGGCACTCTAATGAGACTGCCGGTGACAAACCG
			0	12.5862		-23.6843	2.39966		5.62481e-23	3.80833e-21		Betaproteobacteriales	NA	NA		ASV_988	GGTAGTCCACGCCCTAAACGATGTCAACTGGTTGTTGGACGGCTTGCTGTTCAGTAACGAAGCTAACGCGTGAAGTTGACCGCCTGGGGAGTACGGCCGCAAGGTTGAAACTCAAAGGAATTGACGGGGACCCGCACAAGCGGTGGATGATGTGGTTTAATTCGATGCAACGCGAAAAACCTTACCTACCCTTGACATGTCAAGAATCTTGCAGAGATGTGAGAGTGCTCGAAAGAGAACTTGAACACAGGTGCTGCATGGCCGTCGTCAGCTCGTGTCGTGAGATGTTGGGTTAAGTCCCGCAACGAGCGCAACCCTTATCATTAGTTGCTACGCAAGGGCACTCTAATGAGACTGCCGGTGACAAACCG
			0	21.3791		-24.4647	2.03281		2.3295e-33	2.4375e-31		Betaproteobacteriales	NA	NA		ASV_359	GGTAGTCCACGCCCTAAACGATGTCAACTGGTTGTTGGGTCTTCACTGACTCAGTAACGAAGCTAACGCGTGAAGTTGACCGCCTGGGGAGTACGGCCGCAAGGTTGAAACTCAAAGGAATTGACGGGGACCCGCACAAGCGGTGGATGATGTGGTTTAATTCGATGCAACGCGAAAAACCTTACCCACCTTTGACATGTACGGAATCCTTTAGAGATAGAGGAGTGCTCGAAAGAGAACCGTAACACAGGTGCTGCATGGCTGTCGTCAGCTCGTGTCGTGAGATGTTGGGTTAAGTCCCGCAACGAGCGCAACCCTTGTCATTAGTTGCTACATTCAGTTGGGCACTCTAATGAGACTGCCGGTGACAAACCG
			0	35.4148		-25.1308	1.37164		5.54743e-75	6.38509e-72		Betaproteobacteriales	Pelomonas	puraquae		ASV_531	GGTAGTCCACGCCCTAAACGATGTCAACTGGTTGTTGGGAGGGTTTCTTCTCAGTAACGTAGCTAACGCGTGAAGTTGACCGCCTGGGGAGTACGGCCGCAAGGTTGAAACTCAAAGGAATTGACGGGGACCCGCACAAGCGGTGGATGATGTGGTTTAATTCGATGCAACGCGAAAAACCTTACCTACCCTTGACATGTCTGGAATCCTGAAGAGATTTGGGAGTGCTCGAAAGAGAGCCAGAACACAGGTGCTGCATGGCCGTCGTCAGCTCGTGTCGTGAGATGTTGGGTTAAGTCCCGCAACGAGCGCAACCCTTGTCATTAGTTGCTACGAAAGGGCACTCTAATGAGACTGCCGGTGACAAACCG
			13.0932	0.208814		5.40853	1.31367		3.83645e-05	0.000420548		Azospirillales	Inquilinus	NA		ASV_1272	GGTAGTCCACGCCGTAAACGATGTGTGCTAGCCGTCGGGCAGCTTGCTGTTCGGTGGCGCAGCTAACGCGATAAGCACACCGCCTGGGGAGTACGGTCGCAAGATTAAAACTCAAAGGAATTGACGGGGGCCCGCACAAGCGGTGGAGCATGTGGTTTAATTCGAAGCAACGCGCAGAACCTTACCAACCCTTGACATGGGAAGTATGGGCCTGGGAGACCGGGTCCTTCAGTTCGGCTGGCTTCCACACAGGTGCTGCATGGCTGTCGTCAGCTCGTGTCGTGAGATGTTGGGTTAAGTCCCGCAACGAGCGCAACCCTCCTCTTCAGTTGCCATCATTGAGTTGGGCACTCTGGAGATACTGCCGGTGACAAGCCG
			78.7488	24.7407		1.6673	0.391788		2.08471e-05	0.000251067		Acidobacteriales	Granulicella	NA		ASV_298	GGTAGTCCTAGCCCTAAACGATGATTGCTTGGTGTGGCAGGTACCCAATCCTGCCGTGCCGAAGCTAACGCGATAAGCAATCCGCCTGGGGAGTACGGTCGCAAGGCTGAAACTCAAAGGAATTGACGGGGGCCCGCACAAGCGGTGGAGCATGTGGTTTAATTCGACGCAACGCGAAGAACCTTACCTGGGCTCGAAATGTAGTGGAATCCGGCAGAAACGTCGGCGTCTAGCAATAGACCGCTATATAGGTGCTGCATGGCTGTCGTCAGCTCGTGTCGTGAGATGTTGGGTTAAGTCCCGCAACGAGCGCAACCCTTATCTTCAGTTGCTACCATTTAGTTGAGCACTCTGACGAAACCGCCTCGGATAACGGG
			3.27498	21.3213		-2.70175	0.568737		2.02985e-06	3.24494e-05		NA	NA	NA		ASV_621	GGTAGTCCCAGCAGTAAACGATGGACACTAGGTGTGCGGGGAAATTGACCCCCTGCGTGCCGGAGCAAACGCAATAAGTGTCCCGCCTGGGGAGTACGGTCGCAAGATTAAAACTCAAAGGAATTGACGGGGGCCCGCACAAGCAGCGGAGCGTGTGGTTTAATTCGACGCAACGCGAAGAACCTTACCAGGGCTTGACATGGAGTGTTCAGTAGGGGAAACCTTATGGCCGCAAGGCGAACTTCACAGATGCTGCATGGCTGTCGTCAGCTCGTGTCGTGAGATGTTGGGTTAAGTCCCGCAACGAGCGCAACCCCTGTGATTAGTTGGATAATCTAATCAGACTGCCGGTAGAAAACCG
			0	12.5762		-5.96063	0.901943		3.87807e-11	1.01447e-09		NA	NA	NA		ASV_1181	GGTAGTCTTGGCCCTAAACTATGATCACTAGGTGTCGGGGGGTTTCCTTCGGTGCCGCAGCTAACGCATTAAGTGATCCGCCTGGGGACTACGGCCGCAAGGTTGAAACTCAAAGGAATTGGCGGGGGCCCGCACAAGCGGTGGAGCATATGGCTTAATTCGATGCAACGCGAAGAACCTTACCAGGGCTTGACATGGAGCTGCAAGCCGCCGAAAAGCGGTCGCCTTCGAGGGTGCTTCACAGGTGGTGCATGGCTGTCGTCAGCTCGTGTTGTGAAATGTTGGGTTAAGTCCCGCAACGAGCGCAACCCTCATGTTCTGTTGCCAGCGAGTAAAGTCGGGAACTCGGAACAAACTGCCTCTGTAAAGAG

## Sheet: Sup_Table 5_ANOVA
Supplemental Table 5 Differences in microbial composition according to stress treatment and potato genotype. Bacteria (A,B) and fungi (CD) taxa abundances are separately analysed and samples are split by type into rhizosphere (A,C) and root (B,D). Bray-Curtis disimilarity distance was used for Principal Coordinates Analysis (PCoA). ANOVA and permutation test on general linear models show the impa…
A	bacteria	rhizosphere						C	fungi	rhizosphere
		stress			genotype					stress			genotype
		F-value	test-value		F-value	test-value				F-value	test-value		F-value	test-value
	Axis 1	473.593	1.28979e-32		11.0409	1.88408e-10			Axis 1	6.45	0.0133517		7.15811	2.96591e-07
	Axis 2	26.8592	2.07306e-06		13.3239	4.52192e-12			Axis 2	61.9453	3.44831e-11		2.88332	0.00597287
	Axis 3	0.239867	0.625856		1.68331	0.109747			Axis 3	8.57307	0.00461849		5.96041	3.92353e-06
	Axis 4	0.0890135	0.766332		3.83249	0.000571066			Axis 4	2.9156	0.0922229		1.49714	0.166474
B	bacteria	root						D	fungi	root
		stress			genotype					stress			genotype
		F-value	test-value		F-value	test-value				F-value	test-value		F-value	test-value
	Axis 1	251.728	1.02441e-24		0.733896	0.676487			Axis 1	1.6916	0.19778		12.1368	3.45166e-11
	Axis 2	3.46845	0.0668079		2.21384	0.031199			Axis 2	10.1456	0.00218404		3.47962	0.00138512
	Axis 3	0.649665	0.423002		2.61539	0.0116182			Axis 3	0.882378	0.350876		2.36387	0.02178
	Axis 4	8.48587	0.00481931		9.90579	1.40201e-09			Axis 4	2.55979	0.114249		0.48983	0.876517

## Sheet: Sup_Table 6_pheno_asv
Supplemental Table 6 Characterization of microbes that correlate significantly in their abundance with at least one phenotypic potato plant stress reaction. See also Figure 3
Figure 4	Material	Cluster	abundant in genotypes with	Kingdom	Phylum	Order	Genus	Species	ASV Number	potential Isolate	ASV-sequence	Isolate-sequence	characterization of Isolate	Stock number AIT
A	rhizo	III	small yield loss	Bacteria	Acidobacteria	Acidobacteriales	Granulicella	NA	ASV_1363	no	GGTAGTCCTAGCCCTAAACGATGATTGTTTGATGTGGCAGGTACCCAATCCTGCCGTGTCGAAGCTAACGCGATAAACAATCCGCCTGGGGAGTACGGTCGCAAGGCTGAAACTCAAAGGAATTGACGGGGGCCCGCACAAGCGGTGGAGCATGTGGTTTAATTCGACGCAACGCGAAGAACCTTACCTGGGCTCGAAATGTACATGAATCCGGCAGAAACGTCGGCGTCTAGCAATAGACATGTATATAGGTGCTGCATGGCTGTCGTCAGCTCGTGTCGTGAGATGTTGGGTTAAGTCCCGCAACGAGCGCAACCCTTATCTTCAGTTGCTACCATTTAGTTGAGCACTCTGACGAAACCGCCTCGGATAACGGG
A	rhizo	VI	/	Bacteria	Acidobacteria	Acidobacteriales	NA	NA	ASV_294	no	GGTAGTCCTAGCCCTAAACGATGGATGCTTGGTGTGGCCGGTACCCAATCCGGCTGTGCCGAAGCTAACGCGATAAGCATCCCGCCTGGGGAGTACGGTCGCAAGGCTGAAACTCAAAGGAATTGACGGGGGCCCGCACAAGCGGTGGAGCATGTGGTTCAATTCGACGCAACGCGAAGAACCTTACCTGGGCTCGAAGCACAGTGGACCGGGGTAGAAATATCCCTTTTCGCAAGAACTGCTGTGGAGGTGCTGCATGGCTGTCGTCAGCTCGTGTCGTGAGATGTTGGGTTAAGTCCCGCAACGAGCGCAACCCTTATCGTTAGTTGCCAGCGAGTCAAGTCGGGCACTCTAGCGAAACCGCCCCGGATAACGGG
A	rhizo	III	small yield loss	Bacteria	Acidobacteria	Acidobacteriales	Occallatibacter	NA	ASV_869	no	GGTAGTCCTAGCCCTAAACGATGACTGCTTGGTGTGACGGGTACCCAATCCCGCCGTGCCGTAGCTAACGCGTTAAGCAGTCCGCCTGGGGAGTACGGTCGCAAGGCTGAAACTCAAAGGAATTGACGGGGGCCCGCACAAGCGGTGGAGCATGTGGTTTAATTCGACGCAACGCGAAGAACCTTACCTGGGCTCGAAATGGAGTGGACCGGAGTAGAAATATTCCTTCCCCGCAAGGGGCCGCTTTATAGGTGCTGCATGGCTGTCGTCAGCTCGTGTCGTGAGATGTTGGGTTAAGTCCCGCAACGAGCGCAACCCTTATCCCCAGTTGCCATCATTAAGTTGGGCACTCTGGTGAAACCGCCTCGGATAACGGG
A	rhizo	VI	/	Bacteria	Actinobacteria	Corynebacteriales	Mycobacterium	NA	ASV_275	no	GGTAGTCCACGCCGTAAACGGTGGGTACTAGGTGTGGGTTTCCTTCCTTGGGATCCGTGCCGTAGCTAACGCATTAAGTACCCCGCCTGGGGAGTACGGCCGCAAGGCTAAAACTCAAAGAAATTGACGGGGGCCCGCACAAGCGGCGGAGCATGTGGATTAATTCGATGCAACGCGAAGAACCTTACCTGGGTTTGACATGCACAGGACGACTGCAGAGATGTGGTTTCCCTTGTGGCCTGTGTGCAGGTGGTGCATGGCTGTCGTCAGCTCGTGTCGTGAGATGTTGGGTTAAGTCCCGCAACGAGCGCAACCCTTGTCTCATGTTGCCAGCGCGTTATGGCGGGGACTCGTGAGAGACTGCCGGGGTCAACTCG
A	rhizo	V	/	Bacteria	Actinobacteria	Frankiales	Nakamurella	NA	ASV_227	no	GGTAGTCCACGCCGTAAACGTTGGGCGCTAGGTGTGGGGGTCCTTCCACGACCTCCGTGCCGCAGCTAACGCATTAAGCGCCCCGCCTGGGGAGTACGGCCGCAAGGCTAAAACTCAAAGGAATTGACGGGGGCCCGCACAAGCGGCGGAGCATGCGGATTAATTCGATGCAACGCGAAGAACCTTACCAAGGCTTGACATGCACGGGTAAGTTCCAGAGATGGTTCCCCCGCAAGGTCCGTGCACAGGTGGTGCATGGTTGTCGTCAGCTCGTGTCGTGAGATGTTGGGTTAAGTCCCGCAACGAGCGCAACCCTTGTCTTATGTTGCCAGCGGGTTATGCCGGGGACTCATAAGAGACTGCCGGGGTCAACTCG
A	rhizo	II	/	Bacteria	Actinobacteria	Frankiales	NA	NA	ASV_495	no	GGTAGTCCACGCCGTAAACGGTGGGTGCTAGGTGTAGGGGGTATTCCACGCCCTCTGTGCCGCAGCTAACGCATTAAGCACCCCGCCTGGGGAGTACGGCCGCAAGGCTAAAACTCAAAGGAATTGACGGGGGCCCGCACAAGCAGCGGAGCATGTGGCTTAATTCGACGCAACGCGAAGAACCTTACCAAGGCTTGACATGCAGGGAAATCTCCCAGAGATGGGAGGTCCGCAAGGGTCCTGCACAGGTGGTGCATGGTTGTCGTCAGCTCGTGTCGTGAGATGTTGGGTTAAGTCCCGCAACGAGCGCAACCCTCGTTCTATGTTGCCAGCGCGTTATGGCGGGGACTCATAGGAGACTGCCGGGGTCAACTCG
A	rhizo	I	/	Bacteria	Actinobacteria	Frankiales	NA	NA	ASV_963	no	GGTAGTCCACGCCGTAAACGGTGGGTGCTAGGTGTAGGGGGTATTCCACGCCCTCTGTGCCGCAGCTAACGCATTAAGCACCCCGCCTGGGGAGTACGGCCGCAAGGCTAAAACTCAAAGGAATTGACGGGGGCCCGCACAAGCAGCGGAGCATGTGGCTTAATTCGACGCAACGCGAAGAACCTTACCAAGGCTTGACATACACCGAAAACTCGTAGAGATACGGGGTCCGCAAGGGCGGTGTACAGGTGGTGCATGGTTGTCGTCAGCTCGTGTCGTGAGATGTTGGGTTAAGTCCCGCAACGAGCGCAACCCTCGTTCTATGTTGCCAGCGCGTTATGGCGGGGACTCATAGGAGACTGCCGGGGTCAACTCG
A	rhizo	VI	/	Bacteria	Actinobacteria	Gaiellales	NA	NA	ASV_250	no	GGTAGTCCACGCCGTAAACGATGGGTGCTAGGTGTGGGGGGTGTCGACTCCCTCCGTGCCGAAGCTAACGCATTAAGCACCCCGCCTGGGGAGTACGGCCGCAAGGCTAAAACTCAAAGGAATTGACGGGGGCCCGCACAAGCAGCGGAGCATGTTGTTTAATTCGACGCGACGCGAAGAACCTTACCAAGGCTTGACATGCACGGGAATGTCGTGGAAACACGGCAGCCCTTCGGGGCTCGTGCACAGGTGGTGCATGGCTGTCGTCAGCTCGTGTCGTGAGATGTTGGGTTAAGTCCCGCAACGAGCGCAACCCCTGTCCTATGTTGCCAGCGTGAAAGACGGGGACTCATAGGAGACTGCCGGTGACAAATCG
A	rhizo	I	/	Bacteria	Actinobacteria	Gaiellales	NA	NA	ASV_932	no	GGTAGTCCACGCCGTAAACGATGGGTGCTAGGTGTGGGGGGTGTCGACTCCCTCCGTGCCGAAGCTAACGCATTAAGCACCCCGCCTGGGGAGTACGGCCGCAAGGCTAAAACTCAAAGGAATTGACGGGGGCCCGCACAAGCAGCGGAGCATGTGGTTCAATTCGACGCAACGCGAAGAACCTTACCGAGACTTGACATGCACTGGAATGTCGTAGAAATACGCCAGCCCTTCGGGGCTAGTGCACAGGTGGTGCATGGCTGTCGTCAGCTCGTGTCGTGAGATGTTGGGTTAAGTCCCGCAACGAGCGCAACCCCTGTCCTATGTTGCCAGCGAGTAATGTCGGGGACTCATAGGAGACTGCCGGTGACAAATCG
A	rhizo	VI	/	Bacteria	Actinobacteria	Micrococcales	Arthrobacter	NA	ASV_16	no	GGTAGTCCATGCCGTAAACGTTGGGCACTAGGTGTGGGGGACATTCCACGTTTTCCGCGCCGTAGCTAACGCATTAAGTGCCCCGCCTGGGGAGTACGGCCGCAAGGCTAAAACTCAAAGGAATTGACGGGGGCCCGCACAAGCGGCGGAGCATGCGGATTAATTCGATGCAACGCGAAGAACCTTACCAAGGCTTGACATGGGCCGGACCGGGCTGGAAACAGTCCTTCCCCTTTGGGGCCGGTTCACAGGTGGTGCATGGTTGTCGTCAGCTCGTGTCGTGAGATGTTGGGTTAAGTCCCGCAACGAGCGCAACCCTCGTTCCATGTTGCCAGCGCGTAATGGCGGGGACTCATGGGAGACTGCCGGGGTCAACTCG
A	rhizo	III	small yield loss	Bacteria	Actinobacteria	Micrococcales	Leifsonia	NA	ASV_1774	no	GGTAGTCCACGCCGTAAACGTTGGGCGCTAGATGTGGGGACCATTCCACGGTTTCCGTGTCGCAGCTAACGCATTAAGCGCCCCGCCTGGGGAGTACGGCCGCAAGGCTAAAACTCAAAGGAATTGACGGGGGCCCGCACAAGCGGCGGAGCATGCGGATTAATTCGATGCAACGCGAAGAACCTTACCAAGGCTTGACATATACGAGAACGGGCCAGAAATGGTCAACTCTTTGGACACTCGTAAACAGGTGGTGCATGGTTGTCGTCAGCTCGTGTCGTGAGATGTTGGGTTAAGTCCCGCAACGAGCGCAACCCTCGTCCTATGTTGCCAGCACGTAATGGTGGGAACTCATGGGATACTGCCGGGGTCAACTCG
A	rhizo	VI	/	Bacteria	Actinobacteria	Micrococcales	Oryzihumus	NA	ASV_85	no	GGTAGTCCATGCCGTAAACGTTGGGAACTAGGTGTGGGCCTCATTCCACGAGGTCCGTGCCGCAGCTAACGCATTAAGTTCCCCGCCTGGGGAGTACGGCCGCAAGGCTAAAACTCAAAGGAATTGACGGGGGCCCGCACAAGCGGCGGAGCATGCGGATTAATTCGATGCAACGCGAAGAACCTTACCAAGGCTTGACATATACCGGAAAAGTGCAGAGATGTGCTCCCCGCAAGGTCGGTATACAGGTGGTGCATGGTTGTCGTCAGCTCGTGTCGTGAGATGTTGGGTTAAGTCCCGCAACGAGCGCAACCCTCGTTCTATGTTGCCAGCACGTGATGGTGGGGACTCATAGGAGACTGCCGGGGTCAACTCG
A	rhizo	II	high yield loss	Bacteria	Actinobacteria	Microtrichales	NA	NA	ASV_637	no	GGTAGTCCACGCCGTAAACGTTGGGCACTAGGTGTGGGTCACAACCAACGTGATCTGTGCCGTAGCTAACGCATTAAGTGCCCCGCCTGGGGAGTACGGCCGCAAGGCTAAAACTCAAAGGAATTGACGGGGGCCCGCACAAGCGGCGGAGCATGTTGCTTAATTCGAGGCAACGCGAAGAACCTTACCTGGGTTTGACATGTAGGGAAAAGCCGTAGAGATACGGTGTCCTTCGGGGCCCTACACAGGTGGTGCATGGCTGTCGTCAGCTCGTGTCGTGAGATGTTGGGTTAAGTCCCGCAACGAGCGCAACCCTTGTCCTGTGTTGCTACCAGGTAATGCTGGGCACTCTCAGGAGACTGCCGGGGTCAACTCG
A	rhizo	III	small yield loss	Bacteria	Actinobacteria	Microtrichales	NA	NA	ASV_778	no	GGTAGTCCACGCCGTAAACGTTGGGCACTAGGTGTGGGTCTCAACCAACGAGATCCGTGCCGTAGCTAACGCACTAAGTGCCCCGCCTGGGGAGTACGGCCGCAAGGCTAAAACTCAAAGGAATTGACGGGGGCCCGCACAAGCGGCGGAGCATGTTGCTTAATTCGAGGCAACGCGAAGAACCTTACCTGGGTTTGACATGTAGGGAAAAGCCGTAGAGATACGGTGTCCTTCGGGGCCCTACACAGGTGGTGCATGGCTGTCGTCAGCTCGTGTCGTGAGATGTTGGGTTAAGTCCCGCAACGAGCGCAACCCTTGTCCTATGTTGCCAGCGGATAATGCCGGGGACTCGTAGGAGACTGCCGGGGTCAACTCG
A	rhizo	II	high yield loss	Bacteria	Actinobacteria	Propionibacteriales	Nocardioides	NA	ASV_1019	no	GGTAGTCCACACCGTAAACGTTGGGCGCTAGGTGTGGGGCCTATTCCATGGGTTCCGTGCCGCAGCTAACGCATTAAGCGCCCCGCCTGGGGAGTACGGCCGCAAGGCTAAAACTCAAAGGAATTGACGGGGGCCCGCACAAGCGGCGGAGCATGCGGATTAATTCGATGCAACGCGAAGAACCTTACCTGGGTTTGACATATGCCGGAAACACCTAGAGATAGGTGCCCTTTTAGTCGGTATACAGGTGGTGCATGGCTGTCGTCAGCTCGTGTCGTGAGATGTTGGGTTAAGTCCCGCAACGAGCGCAACCCTCGTTCTATGTTGCCAGCAAGCCCTTCGGGGTGTTGGGGACTCATAGGAGACTGCCGGGGTCAACTCG
A	rhizo	II	high yield loss	Bacteria	Actinobacteria	Propionibacteriales	Aeromicrobium	Aeromicrobium ginsengisoli	ASV_319	no	GGTAGTCCATGCCGTAAACGTTGGGCGCTAGGTGTGGGGACCTTCCACGGTCTCCGTGCCGCAGCTAACGCATTAAGCGCCCCGCCTGGGGAGTACGGCCGCAAGGCTAAAACTCAAAGGAATTGACGGGGGCCCGCACAAGCGGCGGAGCATGCTGATTAATTCGATGCAACGCGAAGAACCTTACCTGGGTTTGACATATACCGGAAAGCTGCAGAGATGTAGCCCCCTTTTGGTCGGTATACAGGTGGTGCATGGCTGTCGTCAGCTCGTGTCGTGAGATGTTGGGTTAAGTCCCGCAACGAGCGCAACCCTCGTCCTATGTTGCCAGCACGTAATGGTGGGGACTCATAGGAGACTGCCGGGGTCAACTCG
A	rhizo	VI	/	Bacteria	Actinobacteria	Pseudonocardiales	Lechevalieria	NA	ASV_105	no	GGTAGTCCACGCCGTAAACGGTGGGTGCTAGGTGTGGGGGACTTCCACGTCCTCTGTGCCGCAGCTAACGCATTAAGCACCCCGCCTGGGGAGTACGGCCGCAAGGCTAAAACTCAAAGGAATTGACGGGGGCCCGCACAAGCGGCGGAGCATGTGGATTAATTCGATGCAACGCGAAGAACCTTACCTGGGCTTGACATGGACTAGAAAGCTCTAGAGATAGAGCCTCCCTTGTGGCTGGTTCACAGGTGGTGCATGGCTGTCGTCAGCTCGTGTCGTGAGATGTTGGGTTAAGTCCCGCAACGAGCGCAACCCTCGTTCCATGTTGCCAGCGCGTAATGGCGGGGACTCATGGGAGACTGCCGGGGTCAACTCG
A	rhizo	IV	/	Bacteria	Actinobacteria	Pseudonocardiales	Lechevalieria	NA	ASV_167	no	GGTAGTCCACGCCGTAAACGGTGGGTGCTAGGTGTGGGGGACTTCCACGTCCTCCGTGCCGCAGCTAACGCATTAAGCACCCCGCCTGGGGAGTACGGCCGCAAGGCTAAAACTCAAAGGAATTGACGGGGGCCCGCACAAGCGGCGGAGCATGTGGATTAATTCGATGCAACGCGAAGAACCTTACCTGGGCTTGACATGGACTAGAAAGCTCTAGAGATAGAGCCTCCCTTGTGGCTGGTTCACAGGTGGTGCATGGCTGTCGTCAGCTCGTGTCGTGAGATGTTGGGTTAAGTCCCGCAACGAGCGCAACCCTCGTTCCATGTTGCCAGCGCGTAATGGCGGGGACTCATGGGAGACTGCCGGGGTCAACTCG
A	rhizo	VI	/	Bacteria	Actinobacteria	Pseudonocardiales	Lechevalieria	NA	ASV_183	no	GGTAGTCCACGCCGTAAACGGTGGGTGCTAGGTGTGGGGGGCTTCCACGCCCTCTGTGCCGCAGCTAACGCATTAAGCACCCCGCCTGGGGAGTACGGCCGCAAGGCTAAAACTCAAAGGAATTGACGGGGGCCCGCACAAGCGGCGGAGCATGTGGATTAATTCGATGCAACGCGAAGAACCTTACCTGGGCTTGACATGGACTAGAAAGCTCTAGAGATAGAGCCTCCCTTGTGGCTGGTTCACAGGTGGTGCATGGCTGTCGTCAGCTCGTGTCGTGAGATGTTGGGTTAAGTCCCGCAACGAGCGCAACCCTCGTTCCATGTTGCCAGCACGTAATGGTGGGGACTCATGGGAGACTGCCGGGGTCAACTCG
A	rhizo	IV	/	Bacteria	Actinobacteria	Pseudonocardiales	NA	NA	ASV_87	no	GGTAGTCCACGCCGTAAACGGTGGGTGCTAGGTGTGGGGGACTTCCACGTCCTCTGTGCCGCAGCTAACGCATTAAGCACCCCGCCTGGGGAGTACGGCCGCAAGGCTAAAACTCAAAGGAATTGACGGGGGCCCGCACAAGCGGCGGAGCATGTGGATTAATTCGATGCAACGCGAAGAACCTTACCTGGGCTTGACATGCACTGGAAACCAGTAGAGATATTGGCCCCCTTGTGGCCGGTGTACAGGTGGTGCATGGCTGTCGTCAGCTCGTGTCGTGAGATGTTGGGTTAAGTCCCGCAACGAGCGCAACCCTCGTTCCATGTTGCCAGCGGGTAATGCCGGGGACTCATGGGAGACTGCCGGGGTCAACTCG
A	rhizo	VI	/	Bacteria	Actinobacteria	Pseudonocardiales	Pseudonocardia	NA	ASV_896	no	GGTAGTCCACGCCGTAAACGGTGGGCGCTAGGTGTGGGGGCCATTCCACGGTCTCTGTGCCGTAGCTAACGCATTAAGCGCCCCGCCTGGGGAGTACGGCCGCAAGGCTAAAACTCAAAGGAATTGACGGGGGCCCGCACAAGCGGCGGAGCATGTGGATTAATTCGATGCAACGCGAAGAACCTTACCTGGGTTTGACATGCGCCAGACGCTGGTAGAGATATCAGTTCCCTTGTGGTTGGTGTGCAGGTGGTGCATGGCTGTCGTCAGCTCGTGTCGTGAGATGTTGGGTTAAGTCCCGCAACGAGCGCAACCCTTGTTCCATGTTGCCAGCGCGTAGTGGCGGGGACTCATGGGAGACTGCCGGGGTCAACTCG
A	rhizo	I	/	Bacteria	Actinobacteria	Solirubrobacterales	NA	NA	ASV_1216	no	GGTAGTCCACGCCGTAAACGATGGGCACTAGGTGTGGGAGGTGTCGACTCCTCCCGTGCCGTCGCTAACGCACTAAGTGCCCCGCCTGGGGAGTACGGCCGCAAGGCTAAAACTCAAAGGAATTGACGGGGGCCCGCACAAGCAGCGGAGCATGTGGTTTAATTCGACGCAACGCGAAGAACCTTACCTGGGCTTGACATGTTGGTGACCGCCGTGGAAACACGGTTTTCCTTCGGGACACCATCACAGGTGGTGCATGGCTGTCGTCAGCTCGTGTCGTGAGATGTTGGGTTAAGTCCCGCAACGAGCGCAACCCCTGTCCTATGTTGCCATCATTAAGTTGGGGACTCATAGGAGACTGCCGGTGACAAACCG
A	rhizo	III	small yield loss	Bacteria	Actinobacteria	Streptomycetales	Streptomyces	NA	ASV_268	no	GGTAGTCCACGCCGTAAACGTTGGGAACTAGGTGTGGGCGACATTCCACGTTGTCCGCGCCGCAGCTAACGCATTAAGTTCCCCGCCTGGGGAGTACGGCCGCAAGGCTAAAACTCAAAGGAATTGACGGGGGCCCGCACAAGCGGCGGAGCATGTGGCTTAATTCGACGCAACGCGAAGAACCTTACCAAGGCTTGACATACGCCGGAAACATCCAGAGATGGGTGCCCCCTTGTGGTCGGTGTACAGGTGGTGCATGGCTGTCGTCAGCTCGTGTCGTGAGATGTTGGGTTAAGTCCCGCAACGAGCGCAACCCTTGTTCTGTGTTGCCAGCATGCCTTTCGGGGTGATGGGGACTCACAGGAGACTGCCGGGGTCAACTCG
A	rhizo	V	small yield loss	Bacteria	Actinobacteria	Streptomycetales	Streptomyces	NA	ASV_62	no	GGTAGTCCACGCCGTAAACGGTGGGAACTAGGTGTTGGCGACATTCCACGTCGTCGGTGCCGCAGCTAACGCATTAAGTTCCCCGCCTGGGGAGTACGGCCGCAAGGCTAAAACTCAAAGGAATTGACGGGGGCCCGCACAAGCAGCGGAGCATGTGGCTTAATTCGACGCAACGCGAAGAACCTTACCAAGGCTTGACATACACCGGAAACGGCCAGAGATGGTCGCCCCCTTGTGGTCGGTGTACAGGTGGTGCATGGCTGTCGTCAGCTCGTGTCGTGAGATGTTGGGTTAAGTCCCGCAACGAGCGCAACCCTTGTCCTGTGTTGCCAGCGTGCCCTTCGGGGTGACGGGGACTCACAGGAGACCGCCGGGGTCAACTCG
A	rhizo	III	small yield loss	Bacteria	Actinobacteria	Streptomycetales	Streptomyces	NA	ASV_794	no	GGTAGTCCACGCCGTAAACGTTGGGAACTAGGTGTTGGCGACATTCCACGTCGTCGGTGCCGCAGCTAACGCATTAAGTTCCCCGCCTGGGGAGTACGGCCGCAAGGCTAAAACTCAAAGGAATTGACGGGGGCCCGCACAAGCAGCGGAGCATGTGGCTTAATTCGACGCAACGCGAAGAACCTTACCAAGGCTTGACATACACCGGAAAGCGCCAGAGATGGTGCCCCCCTTGTGGTCGGTGTACAGGTGGTGCATGGCTGTCGTCAGCTCGTGTCGTGAGATGTTGGGTTAAGTCCCGCAACGAGCGCAACCCCTGTTCTGTGTTGCCAGCATGCCTTTCGGGGTGATGGGGACTCACAGGAGACCGCCGGGGTCAACTCG
A	rhizo	I	/	Bacteria	Armatimonadetes	Armatimonadales	NA	NA	ASV_542	no	GGTAGTCCACGCCGTAAACGATGAGTGCTAGATGTCCGGGGTATCGACCCCCCTGGTGTCGCAGCTAACGCAATAAGCACTCCGCCTGGGGAGTACGGCCGCAAGGTTGAAACTCAAAGGAATTGACGGGGGCCCGCACAAGCGGTGGAGCATGTGCATTAATTCGTCACTAACCGAAGAACCTTACCAGGGTTTGACATCTCTGGACATGCCATGAAAGTGGTCCTTCCCCGCAAGGGGACCAGAAGACAGGTGTTGCATGGTTGTCGTCAGCTCGTGTCGTGAGATGTTGGGTTAAGTCCCGCAACGAGCGCAACCCTCACCCAATGTTGCCAGCGTTAAGTCGGGCACTCTTTGGGAACTGCCCATGTAAGTGG
A	rhizo	I	/	Bacteria	Bacteroidetes	Bacteroidales	WCHB1-32	NA	ASV_2021	no	GGTAGTCCACGCCGTAAACGATGCTCACTCGCTGTTTGCGATACACAGCAAGCGGCCAAGCGAAAGCATTAAGTGAGCCACCTGGGGAGTACGATCGCAAGGTTGAAACTCAAAGGAATTGACGGGGGCCCGCACAAGCGGAGGAACATGTGGTTTAATTCGATGATACGCGAGGAACCTTACCTGGGCTTAAATGTAGAGCGACAGATTGTGAAAGCAGTCCTTCTTCGGACGATCTACAAGGTGCTGCATGGTTGTCGTCAGCTCGTGCCGTGAGGTGTCGGGTTAAGTCCCATAACGAGCGCAACCCTTATCGTTAGTTGCCAGCGGGTCAAGCCGGGGACTCTAGCGAGACTGCCACCGTAAGGTGT
A	rhizo	IV	/	Bacteria	Bacteroidetes	Chitinophagales	Chitinophaga	Chitinophaga oryziterrae	ASV_328	no	GGTAGTCCACGCCCTAAACGATGATTACTCGACATTTGCGATACACAGCAAGTGTCTGAGCGAAAGCATTAAGTAATCCACCTGGGAAGTACGACCGCAAGGTTGAAACTCAAAGGAATTGACGGGGGTCCGCACAAGCGGTGGAGCATGTGGTTTAATTCGATGATACGCGAGGAACCTTACCTGGGCTAGAATGCAGAATGACCGTGGGTGAAAGCTCATTTTGTAGCAATACACATTTTGTAAGGTGCTGCATGGCTGTCGTCAGCTCGTGCCGTGAGGTGTTGGGTTAAGTCCCGCAACGAGCGCAACCCCTATCTTTAGTTGCCAACAGGTTAAGCTGGGAACTCTAAAGAAACTGCCGTCGTAAGACGC
A	rhizo	III	small yield loss	Bacteria	Bacteroidetes	Chitinophagales	Chitinophaga	Chitinophaga arvensicola	ASV_499	no	GGTAGTCCACGCCCTAAACGATGATTACTCGACATACGCGATACACAGTGTGTGTCTGAGCGAAAGCATTAAGTAATCCACCTGGGAAGTACGACCGCAAGGTTGAAACTCAAAGGAATTGACGGGGGTCCGCACAAGCGGTGGAGCATGTGGTTTAATTCGATGATACGCGAGGAACCTTACCTGGGCTAGAATGCAGTCTGACTGATGCTGAAAGGTGTCTTTGTAGCAATACACAGATTGTAAGGTGCTGCATGGCTGTCGTCAGCTCGTGCCGTGAGGTGTTGGGTTAAGTCCCGCAACGAGCGCAACCCCTATCACTAGTTGCCAGCACGTAATGGTGGGAACTCTAGTGAAACTGCCGTCGTAAGACGC
A	rhizo	VI	/	Bacteria	Bacteroidetes	Cytophagales	Dyadobacter	NA	ASV_47	no	GGTAGTCCATGCCGTAAACGATGAGGACTCGCTGTTGGTCTGTCAAGGATCAGCGGCTTAGGGAAACCGTTAAGTCCTCCACCTGGGGAGTACGCCGGCAACGGTGAAACTCAAAGGAATTGACGGGGGTCCGCACAAGCGGTGGAGCATGTGGTTTAATTCGATGATACGCGAGGAACCTTACCTGGGCTAAATCACAGGAGAATCATTCAGAAATGGGTGAGCCAGCAATGGCTGCTGTGAAGGTGCTGCATGGCTGTCGTCAGCTCGTGTCGTGAGATGTTGGGTTAAGTCCCGCAACGAGCGCAACCCCTATGGTTAGTTGCCAGCACGTAATGGTGGGGACTCTAATCAGACTGCCTGTGCAAACAGA
A	rhizo	II	high yield loss	Bacteria	Bacteroidetes	Flavobacteriales	Flavobacterium	NA	ASV_14	yes	GGTAGTCCACGCCGTAAACGATGGATACTAGCTGTTGGGCGCAAGTTCAGTGGCTAAGCGAAAGTGATAAGTATCCCACCTGGGGAGTACGTTCGCAAGAATGAAACTCAAAGGAATTGACGGGGGCCCGCACAAGCGGTGGAGCATGTGGTTTAATTCGATGATACGCGAGGAACCTTACCAAGGCTTAAATGTAGATTGACCGGTTTGGAAACAGATCTTTCGCAAGACAATTTACAAGGTGCTGCATGGTTGTCGTCAGCTCGTGCCGTGAGGTGTCAGGTTAAGTCCTATAACGAGCGCAACCCCTGTTGTTAGTTGCCAGCGAGTCAAGTCGGGAACTCTAACAAGACTGCCAGTGCAAACTGT	GAAAGTGATAAGTATCCCACCTGGGGAGTACGTTCGCAAGAATGAAACTCAAAGGAATTGACGGGGGCCCGCACAAGCGGTGGAGCATGTGGTTTAATTCGATGATACGCGAGGAACCTTACCAAGGCTTAAATGTAGATTGACCGGTTTGGAAACAGATCTTTCGCAAGACAATTTACAAGGTGCTGCATGGTTGTCGTCAGCTCGTGCCGTGAGGTGTCAGGTTAAGTCCTATAACGAGCGCAACCCCTGTTGTTAGTTGCCAGCGAGTCAAGTCGGGAACTCTAACAAGACTGCCAGTGCAAACTGTGAGGAAGGTGGGGATGACGTCAAATCATCACGGCCCTTACGCCTTGGGCTACACACGTGCTACAATGGCCGGTACAGAGAGCAGCCACT…	Flavobacterium	145 L
A	rhizo	IV	/	Bacteria	Bacteroidetes	Flavobacteriales	Flavobacterium	NA	ASV_173	yes	GGTAGTCCACGCCGTAAACGATGGATACTAGCTGTTGGAAGCAATTTCAGTGGCTAAGCGAAAGTGATAAGTATCCCACCTGGGGAGTACGTTCGCAAGAATGAAACTCAAAGGAATTGACGGGGGCCCGCACAAGCGGTGGAGCATGTGGTTTAATTCGATGATACGCGAGGAACCTTACCAAGGCTTAAATGTAGATTGACCGTTTTGGAAACAGAACTTTCGCAAGACAATTTACAAGGTGCTGCATGGTTGTCGTCAGCTCGTGCCGTGAGGTGTCAGGTTAAGTCCTATAACGAGCGCAACCCCTGTTGTTAGTTGCCAGCGAGTCATGTCGGGAACTCTAACAAGACTGCCAGTGCAAACTGT	GCTAAGCGAAAGTGATAAGTATCCCACCTGGGGAGTACGTTCGCAAGAATGAAACTCAAAGGAATTGACGGGGGCCCGCACAAGCGGTGGAGCATGTGGTTTAATTCGATGATACGCGAGGAACCTTACCAAGGCTTAAATGTAGATTGACCGTTTTGGAAACAGAACTTTCGCAAGACAATTTACAAGGTGCTGCATGGTTGTCGTCAGCTCGTGCCGTGAGGTGTCAGGTTAAGTCCTATAACGAGCGCAACCCCTGTTGTTAGTTGCCAGCGAGTCATGTCGGGAACTCTAACAAGACTGCCAGTGCAAACTGTGAGGAAGGTGGGGATGACGTCAAATCATCACGGCCCTTACGCCTTGGGCTACACACGTGCTACAATGGCCGGTACAGAGAGC…	Flavobacterium	150 O
A	rhizo	II	high yield loss	Bacteria	Bacteroidetes	Flavobacteriales	Flavobacterium	Flavobacterium psychrolimnae	ASV_228	yes	GGTAGTCCACGCCGTAAACGATGGATACTAGCTGTTGGAAGCAATTTCAGTGGCTAAGCGAAAGTGATAAGTATCCCACCTGGGGAGTACGTTCGCAAGAATGAAACTCAAAGGAATTGACGGGGGCCCGCACAAGCGGTGGAGCATGTGGTTTAATTCGATGATACGCGAGGAACCTTACCAAGGCTTAAATGTAGATTGACCGTTTTGGAAACAGAACTTTCGCAAGACAATTTACAAGGTGCTGCATGGTTGTCGTCAGCTCGTGCCGTGAGGTGTCAGGTTAAGTCCTATAACGAGCGCAACCCCTGTTGTTAGTTGCCAGCGAGTCAAGTCGGGAACTCTAACAAGACTGCCAGTGCAAACTGT	GGGTGCGTAACGCGTATGCAATCTACCTTTTACAGAGGGATAGCCCAGAGAAATTTGGATTAATACCTCATAGTATAGCTGAATCGCATGATTCTACTATTAAAGTCACAACGGTAAAAGATGAGCATGCGTCCCATTAGCTAGTTGGTAAGGTAACGGCTTACCAAGGCTACGATGGGTAGGGGTCCTGAGAGGGAGATCCCCCACACTGGTACTGAGACACGGACCAGACTCCAACGGGAGGCAGCAGTGAGGAATATTGGACAATGGGCGCAAGCCTGATCCAGCCATGCCGCGTGCAGGATGACGGTCCTATGGATTGTAAACTGCTTTTATACGAGAAGAAACACTACTTCGTGAAGTAGCTTGACGGTATCGTAAGAATAAGGATCGGCTAAC…	Flavobacterium	153 U
A	rhizo	II	high yield loss	Bacteria	Bacteroidetes	Flavobacteriales	Flavobacterium	NA	ASV_30	no	GGTAGTCCACGCCGTAAACGATGGATACTAGCTGTTGGGAGCAATCTCAGTGGCTAAGCGAAAGTGATAAGTATCCCACCTGGGGAGTACGTTCGCAAGAATGAAACTCAAAGGAATTGACGGGGGCCCGCACAAGCGGTGGAGCATGTGGTTTAATTCGATGATACGCGAGGAACCTTACCAAGGCTTAAATGTAGATTGACCGGTTTGGAAACAGATCTTTCGCAAGACAATTTACAAGGTGCTGCATGGTTGTCGTCAGCTCGTGCCGTGAGGTGTCAGGTTAAGTCCTATAACGAGCGCAACCCCTGTTGTTAGTTGCCAGCGAGTCAAGTCGGGAACTCTAACAAGACTGCCAGTGCAAACTGT
A	rhizo	VI	/	Bacteria	Bacteroidetes	Flavobacteriales	Chryseobacterium	NA	ASV_92	yes	GGTAGTCCACGCCGTAAACGATGCTAACTCGTTTTTGGGTTTTCGGATTCAGAGACTAAGCGAAAGTGATAAGTTAGCCACCTGGGGAGTACGAACGCAAGTTTGAAACTCAAAGGAATTGACGGGGGCCCGCACAAGCGGTGGATTATGTGGTTTAATTCGATGATACGCGAGGAACCTTACCAAGGCTTAAATGGGAATTGACAGGTTTAGAAATAGACTTTTCTTCGGACAATTTTCAAGGTGCTGCATGGTTGTCGTCAGCTCGTGCCGTGAGGTGTTAGGTTAAGTCCTGCAACGAGCGCAACCCCTGTCACTAGTTGCTAGCATTAAGTTGAGGACTCTAGTGAGACTGCCTACGCAAGTAGA	CCATGGCTTGACGGGCGGTGTGTACAAGGCCCGGGAACGTATTCACCGCGCCATGGCTGATGCGCGATTACTAGCGATTCCAGCTTCATAGAGTCGAGTTGCAGACTCCAATCCGAACTGAGACCAGCTTTCGAGATTAGCATCCAGTCGCCTGGTAGCAGCCCTCTGTACTGGCCATTGTATTACGTGTGTGGCCCAAGGCGTAAGGGCCGTGATGATTTGACGTCATCCCCACCTTCCTCTCTACTTGCGTAGGCAGTCTCACTAGAGTCCTCAACTTAATGCTAGCAACTAGTGACAGGGGTTGCGCTCGTTGCAGGACTTAACCTAACACCTCACGGCACGAGCTGACGACAACCATGCAGCACCTTGAAAATTGTCCGAAGAAAAGTCTATTTC…	Chryseobacterium	148 P
A	rhizo	VI	/	Bacteria	Bacteroidetes	Sphingobacteriales	Pedobacter	NA	ASV_554	no	GGTAGTCCACGCCCTAAACGATGAACACTCGCTGTTGGCGATACACAGTCAGCGGCTAAGCGAAAGCGTTAAGTGTTCCACCTGGGGAGTACGCTCGCAAGAGTGAAACTCAAAGGAATTGACGGGGGCCCGCACAAGCGGAGGAGCATGTGGTTTAATTCGATGATACGCGAGGAACCTTACCCGGGCTTGAAAGTTAGTGAATCATCCAGAGATGGATGAGTGAGCAATCACACGAAACTAGGTGCTGCATGGCTGTCGTCAGCTCGTGCCGTGAGGTGTTGGGTTAAGTCCCGCAACGAGCGCAACCCCTATGTTTAGTTGCCAGCACGTAATGGTGGGGACTCTAAACAGACTGCCTGTGCAAACAGA
A	rhizo	II	/	Bacteria	Gemmatimonadetes	Gemmatimonadales	Gemmatimonas	NA	ASV_1135	no	GGTAGTCCACGCCGTAAACGATGGGCACTAGGTGCTTGGGGGAGCGACCCCCTGAGTGCCGGCGCTAACGCATTAAGTGCCCCGCCTGGGGAGTACGGCCGCAAGGCTGAAACTCAAAGGAATTGACGGGGGCCCGCACAAGCGGTGGAGCATGTGGTTTAATTCGACGCAACGCGAAGAACCTTACCTAGGCTTGACATGCAGAGGAAAGCTCTGAGAAACCAGAGCCCTCCTTCGGGACTTCTGCACAGGTGCTGCATGGCTGTCGTCAGCTCGTGTCGTGAGATGTTGGGTTAAGTCCCGCAACGAGCGCAACCCCTGTTCCCAGTTGCCAGCGCGTCATGGCGGGGACTCTGGGAAGACTGCCGGTGCCAAACCG
A	rhizo	I	/	Bacteria	Gemmatimonadetes	Gemmatimonadales	NA	NA	ASV_1439	no	GGTAGTCCACGCCGTAAACGATGGGTACTAGGTGCCTGGGGGAGCGACCCTCTGGGTGCCGGCGCTAACGCAGGAAGTACCCCGCCTGGGGAGTACGGCCGCAAGGCTGAAACTCAAAGGAATTGACGGGGGCCCGCACAAGCGGTGGAGCATGTGGTTTAATTCGACGCAACGCGAAGAACCTTACCTAGGCTTGACATGTACGAGTAACTCCTCAGAAACGAGGAGCCCTCTTCGGAGTTCGTACACAGGTGCTGCATGGCTGTCGTCAGCTCGTGTCGTGAGATGTTGGGTTAAGTCCCGCAACGAGCGCAACCCCTGTTCTTAGTTGCCAGCGCGTAATGGCGGGGACTCTAGGAAGACTGCCGGTGCCAAACCG
A	rhizo	II	/	Bacteria	Gemmatimonadetes	Gemmatimonadales	NA	NA	ASV_1591	no	GGTAGTCCACGCCGTAAACGATGGGCACTAGGTGCTTGGGGGAGCGACCCTCCGAGTGCCGTCGCTAACGCATTAAGTGCCCCGCCTGGGGAGTACGGCCGCAAGGCTGAAACTCAAAGGAATTGACGGGGGCCCGCACAAGCGGTGGAGCATGTGGTTTAATTCGACGCAACGCGCAGAACCTTACCTGGGCTTGACATGCACGGGAAACCCGGTGGAAACATCGGGCCCTCTTCGGAGTCCGTGCACAGGTGCTGCATGGCTGTCGTCAGCTCGTGTCGTGAGATGTTGGGTTAAGTCCCGCAACGAGCGCAACCCCCGCCCCGTGTTGCTCACAGGTAAAGCTGAGGACTCTCGGGGGACTGCCGGTGCCAAACCG
A	rhizo	II	high yield loss	Bacteria	Gemmatimonadetes	Gemmatimonadales	NA	NA	ASV_446	no	GGTAGTCCACGCCGTAAACGATGGGTACTAGGTGCCTGGGGGAGCGACCCCTTGGGTGCCGGCGCTAACGCAGGAAGTACCCCGCCTGGGGAGTACGGCCGCAAGGCTGAAACTCAAAGGAATTGACGGGGGCCCGCACAAGCGGTGGAGCATGTGGTTTAATTCGACGCAACGCGAAGAACCTTACCTAGGCTTGACATGCATGGGAAACTCCTCAGAAACGAGGAGCCTCCTTCGGGATCCATGCACAGGTGCTGCATGGCTGTCGTCAGCTCGTGTCGTGAGATGTTGGGTTAAGTCCCGCAACGAGCGCAACCCCTGTTCTTAGTTACCAGCGCGTAATGGCGGGGACTCTAGGAAGACTGCCGGTGCCAAACCG
A	rhizo	I	/	Bacteria	Gemmatimonadetes	Gemmatimonadales	Gemmatimonas	NA	ASV_500	no	GGTAGTCCACGCCGTAAACGATGGGCACTAGGCGCTTGGGGGAGCGACCCCTCGAGGGCCGGCGCTAACGCATTAAGTGCCCCGCCTGGGGAGTACGGCCGCAAGGCTGAAACTCAAAGGAATTGACGGGGGCCCGCACAAGCGGTGGAGCATGTGGTTTAATTCGACGCAACGCGAAGAACCTTACCTAGGCTTGACATGCACGGGAAACCTTCCAGAAACGGGAGGCCCTCTTCGGAGCCCGTGCACAGGTGCTGCATGGCTGTCGTCAGCTCGTGTCGTGAGATGTTGGGTTAAGTCCCGCAACGAGCGCAACCCCTGTTCCTAGTTGCCAGCGCGTCATGGCGGGGACTCTAGGGAGACTGCCGGTGCCAAACCG
A	rhizo	I	/	Bacteria	Gemmatimonadetes	Gemmatimonadales	NA	NA	ASV_550	no	GGTAGTCCACGCCGTAAACGATGGGCACTAGGTGCTTGGGGGAGCGACCCTCCGAGTGCCGGCGCTAACGCATTAAGTGCCCCGCCTGGGGAGTACGGCCGCAAGGCTGAAACTCAAAGGAATTGACGGGGGCCCGCACAAGCGGTGGAGCATGTGGTTTAATTCGACGCAACGCGAAGAACCTTACCTGGGCTTGACATGCGCGGGAAACGCCCCAGAAAGGGGGCGCCCTCTTCGGAGTCCGCGCACAGGTGCTGCATGGCTGTCGTCAGCTCGTGTCGTGAGATGTTGGGTTAAGTCCCGCAACGAGCGCAACCCCCGTCTCTAGTTACCAGCGGGTAAAGCCGGGCACTCTAGAGAGACTGCCGGTGCCAAACCG
A	rhizo	V	small yield loss	Bacteria	Gemmatimonadetes	Gemmatimonadales	Gemmatimonas	NA	ASV_797	no	GGTAGTCCACGCCGTAAACGATGGGCACTAGGTGCTTGGGGGAGCGACCCCCTGAGTGCCGGCGCTAACGCATTAAGTGCCCCGCCTGGGGAGTACGGCCGCAAGGCTGAAACTCAAAGGAATTGACGGGGGCCCGCACAAGCGGTGGAGCATGTGGTTTAATTCGACGCAACGCGAAGAACCTTACCTAGGCTTGACATGCACGGGAAAGCTCTGAGAGACCAGAGCCCTCCTTCGGGACTCGTGCACAGGTGCTGCATGGCTGTCGTCAGCTCGTGTCGTGAGATGTTGGGTTAAGTCCCGCAACGAGCGCAACCCCCGTTCCCAGTTGCTAACAGGTTAAGCTGAGGACTCTGGGAAGACTGCCGGTGCCAAACCG
A	rhizo	IV	/	Bacteria	Patescibacteria	Saccharimonadales	NA	NA	ASV_378	no	GGTAGTCCACGCCGTAAACGATGGATACTAGCTGTTGGAGGTATCGACCCCTTCAGTAGCGAAGCTAACGCGTTAAGTATCCCGCCTGTGGAGTACGGTCGCAAGACTAAAACATAAAGGAATTGACGGGGGACCGCACAAGCGGTGGATCGTGTTCTTTAATTCGATGATAAACGAAGAACCTTACCAGGGTTTGACATCCTTGGAATTTCTGTGAAAGCAGAGAGTGCTTTATTGAGCCAAGTGACAGGTGATGCATGGCCGTCGTCAGCTCGTGTCGTGAGATGTTTGGTTAAGTCCATCAACGAGCGCAACCCTTGTGAATAGTTGTATTTTTCTATTCAGACTGCCCCGGTAACGGG
A	rhizo	II	/	Bacteria	Patescibacteria	Saccharimonadales	NA	NA	ASV_962	no	GGTAGTCCACGCCGTAAACGATGGATACTAGCTGTTGGAGGTATCGACCCCTTCAGTAGCGAAGCTAACGCGTTAAGTATCCCGCCTGTGGAGTACGGTCGCAAGACTAAAACATAAAGGAATTGACGGGGACCCGCACAAGCGGTGGATCGTGTTCTTTAATTCGATGATAAACGAAGAACCTTACCAGGGCTTGACATCCAGGGAAGCACTACGAAAGTAGAGTGTGCCTTTTGGAACCCTGTGACAGATGATGCATGGCCGTCGTCAGCTCGTGTCGTGAGATGTTTGGTTAAGTCCATTAACGAGCGCAACCCTTGTGAATAGTTGTATTTTTCTATTCAGACTGCCCCGGTAACGGG
A	rhizo	III	small yield loss	Bacteria	Proteobacteria	Betaproteobacteriales	Massilia	NA	ASV_115	no	GGTAGTCCACGCCCTAAACGATGTCTACTAGTTGTCGGGTCTTAATTGACTTGGTAACGCAGCTAACGCGTGAAGTAGACCGCCTGGGGAGTACGGTCGCAAGATTAAAACTCAAAGGAATTGACGGGGACCCGCACAAGCGGTGGATGATGTGGATTAATTCGATGCAACGCGAAAAACCTTACCTACCCTTGACATGTCAGGAATCCTGGAGAGATCCGGGAGTGCCCGAAAGGGAGCCTGAACACAGGTGCTGCATGGCTGTCGTCAGCTCGTGTCGTGAGATGTTGGGTTAAGTCCCGCAACGAGCGCAACCCTTGTCATTAGTTGCTACGAAAGGGCACTCTAATGAGACTGCCGGTGACAAACCG
A	rhizo	I	/	Bacteria	Proteobacteria	Betaproteobacteriales	NA	NA	ASV_1551	no	GGTAGTCCACGCCCTAAACGATGTCAACTGGTTGTTGGGTCTTCACTGACTCAGTAACGAAGCTAACGCGTGAAGTTGACCGCCTGGGGAGTACGGCCGCAAGGTTGAAACTCAAAGGAATTGACGGGGACCCGCACAAGCGGTGGATGATGTGGTTTAATTCGATGCAACGCGAAAAACCTTACCCACCTTTGACATGTACGGAATCCTCCAGAGATGGAGGAGTGCTCGAAAGAGAGCCGTAACACAGGTGCTGCATGGCTGTCGTCAGCTCGTGTCGTGAGATGTTGGGTTAAGTCCCGCAACGAGCGCAACCCTTGTCATTAGTTGCTACATTTAGTTGGGCACTCTAATGAGACTGCCGGTGACAAACCG
A	rhizo	II	high yield loss	Bacteria	Proteobacteria	Betaproteobacteriales	Janthinobacterium	NA	ASV_229	yes	GGTAGTCCACGCCCTAAACGATGTCTACTAGTTGTCGGGTCTTAATTGACTTGGTAACGCAGCTAACGCGTGAAGTAGACCGCCTGGGGAGTACGGTCGCAAGATTAAAACTCAAAGGAATTGACGGGGACCCGCACAAGCGGTGGATGATGTGGATTAATTCGATGCAACGCGAAAAACCTTACCTACCCTTGACATGGCTGGAATCCCTGAGAGATTGGGGAGTGCTCGAAAGAGAACCAGTACACAGGTGCTGCATGGCTGTCGTCAGCTCGTGTCGTGAGATGTTGGGTTAAGTCCCGCAACGAGCGCAACCCTTGTCATTAGTTGCTACGAAAGGGCACTCTAATGAGACTGCCGGTGACAAACCG	TTGTTACGACTTCACCCCAGTCACGAATCCTACCGTGGTAAGCCGCGCCTCCTTGCGGTTAAGCTACCTACTTCTGGTAAAACCCGCTCCCATGGTGTGACGGGCGGTGTGTACAAGACCCGGGAACGTATTCACCGCGACATGCTGATCCGCGATTACTAGCGATTCCAACTTCATGCAGTCGAGTTGCAGACTACAATCCGGACTACGATACACTTTCTGGGATTAGCTCCCCCTCGCGGGTTGGCGGCCCTCTGTATGTACCATTGTATGACGTGTGAAGCCCTACCCATAAGGGCCATGAGGACTTGACGTCATCCCCACCTTCCTCCGGTTTGTCACCGGCAGTCTCATTAGAGTGCCCTTTCGTAGCAACTAATGACAAGGGTTGCGCTCGTT…	Proteobacteria	146 N
A	rhizo	IV	/	Bacteria	Proteobacteria	Betaproteobacteriales	Duganella	NA	ASV_295	no	GGTAGTCCACGCCCTAAACGATGTCTACTAGTTGTCGGGTCTTAATTGACTTGGTAACGCAGCTAACGCGTGAAGTAGACCGCCTGGGGAGTACGGTCGCAAGATTAAAACTCAAAGGAATTGACGGGGACCCGCACAAGCGGTGGATGATGTGGATTAATTCGATGCAACGCGAAAAACCTTACCTACCCTTGACATGGATGGAATCCCGGAGAGATTTGGGAGTGCCCGAAAGGGAACCATCACACAGGTGCTGCATGGCTGTCGTCAGCTCGTGTCGTGAGATGTTGGGTTAAGTCCCGCAACGAGCGCAACCCTTGTCATTAGTTGCTACGAAAGGGCACTCTAATGAGACTGCCGGTGACAAACCG
A	rhizo	IV	/	Bacteria	Proteobacteria	Betaproteobacteriales	Janthinobacterium	Janthinobacterium lividum	ASV_313	no	GGTAGTCCACGCCCTAAACGATGTCTACTAGTTGTCGGGTCTTAATTGACTTGGTAACGCAGCTAACGCGTGAAGTAGACCGCCTGGGGAGTACGGTCGCAAGATTAAAACTCAAAGGAATTGACGGGGACCCGCACAAGCGGTGGATGATGTGGATTAATTCGATGCAACGCGAAAAACCTTACCTACCCTTGACATGGCTGGAATCCCCGAGAGATTGGGGAGTGCTCGAAAGAGAACCAGTACACAGGTGCTGCATGGCTGTCGTCAGCTCGTGTCGTGAGATGTTGGGTTAAGTCCCGCAACGAGCGCAACCCTTGTCATTAGTTGCTACGAAAGGGCACTCTAATGAGACTGCCGGTGACAAACCG
A	rhizo	IV	/	Bacteria	Proteobacteria	Betaproteobacteriales	Massilia	NA	ASV_486	no	GGTAGTCCACGCCCTAAACGATGTCTACTAGTTGTCGGGTTTTAATTAACTTGGTAACGCAGCTAACGCGTGAAGTAGACCGCCTGGGGAGTACGGTCGCAAGATTAAAACTCAAAGGAATTGACGGGGACCCGCACAAGCGGTGGATGATGTGGATTAATTCGATGCAACGCGAAAAACCTTACCTACCCTTGACATGTACGGAAGCCACGAGAGATCGAGGCGTGCTCGAAAGAGAGCCGTAACACAGGTGCTGCATGGCTGTCGTCAGCTCGTGTCGTGAGATGTTGGGTTAAGTCCCGCAACGAGCGCAACCCTTGTCATTAGTTGCTACGAAAGAGCACTCTAATGAGACTGCCGGTGACAAACCG
A	rhizo	V	/	Bacteria	Proteobacteria	Betaproteobacteriales	Collimonas	Collimonas fungivorans	ASV_696	no	GGTAGTCCACGCCCTAAACGATGTCTACTAGTTGTCGGGTCTTAATTGACTTGGTAACGCAGCTAACGCGTGAAGTAGACCGCCTGGGGAGTACGGTCGCAAGATTAAAACTCAAAGGAATTGACGGGGACCCGCACAAGCGGTGGATGATGTGGATTAATTCGATGCAACGCGAAAAACCTTACCTACCCTTGACATGTACAGAATCCCGAAGAGATTTGGGAGTGTTCGAAAGAAAGCTGTAACACAGGTGCTGCATGGCTGTCGTCAGCTCGTGTCGTGAGATGTTGGGTTAAGTCCCGCAACGAGCGCAACCCTTGTCATTAGTTGCTACGAAAGGGCACTCTAATGAGACTGCCGGTGACAAACCG
A	rhizo	I	/	Bacteria	Proteobacteria	Betaproteobacteriales	Nitrosospira	NA	ASV_804	no	GGTAGTCCACGCCCTAAACGATGTCAACTAGTTGTCGGGTCTTAACGGGCTTGGTAACGCAGCTAACGCGTGAAGTTGACCGCCTGGGGAGTACGGTCGCAAGATTAAAACTCAAAGGAATTGACGGGGACCCGCACAAGCGGTGGATTATGTGGATTAATTCGATGCAACGCGAAAAACCTTACCTACCCTTGACATGTACCGAAGCCCGCTGAGAGGTGGGTGTGCCCGAAAGGGAGCGGTAACACAGGTGCTGCATGGCTGTCGTCAGCTCGTGTCGTGAGATGTTGGGTTAAGTCCCGCAACGAGCGCAACCCTTGTCATTAATTGCCATCATTCAGTTGGGCACTTTAATGAAACTGCCGGTGACAAACCG
A	rhizo	III	small yield loss	Bacteria	Proteobacteria	Betaproteobacteriales	Burkholderia-Caballeronia-Paraburkholderia	NA	ASV_949	no	GGTAGTCCACGCCCTAAACGATGTCAACTGGTTGTCGGGCCTTCATTGGCTTGGTAACGTAGCTAACGCGTGAAGTTGACCGCCTGGGGAGTACGGTCGCAAGATTAAAACTCAAAGGAATTGACGGGGACCCGCACAAGCGGTGGATGATGTGGATTAATTCGATGCAACGCGAAAAACCTTACCTACCCTTGACATGTACGGAAGTCCGCTGAGAGGTGGATGTGCCCGAAAGGGAGCCGTAACACAGGTGCTGCATGGCTGTCGTCAGCTCGTGTCGTGAGATGTTGGGTTAAGTCCCGCAACGAGCGCAACCCTTGTCCCTAGTTGCTACGCAAGAGCACTCCAGGGAGACTGCCGGTGACAAACCG
A	rhizo	II	high yield loss	Bacteria	Proteobacteria	Caulobacterales	Caulobacter	NA	ASV_1490	no	GGTAGTCCACGCTGTAAACGATGAGTGCTAGTTGTCGGCAGGCATGCCTGTCGGTGACGCAGCTAACGCATTAAGCACTCCGCCTGGGGAGTACGGTCGCAAGATTAAAACTCAAAGGAATTGACGGGGGCCCGCACAAGCGGTGGAGCATGTGGTTTAATTCGAAGCAACGCGCAGAACCTTACCACCTTTTGACATGCCCGGACCGCCTCAGAGATGAGGCTTTCCCTTCGGGGACTGGGACACAGGTGCTGCATGGCTGTCGTCAGCTCGTGTCGTGAGATGTTGGGTTAAGTCCCGCAACGAGCGCAACCCTCGCTATTAGTTGCCATCAGGTTTGGCTGGGCACTCTAATAGGACCGCCGGTGGTAAGCCG
A	rhizo	I	/	Bacteria	Proteobacteria	Caulobacterales	NA	NA	ASV_1520	no	GGTAGTCCACGCTGTAAACGATGAGTGCTAGTTGTCGGTATGCATGCATATCGGTGACGCAGCTAACGCATTAAGCACTCCGCCTGGGGAGTACGGTCGCAAGATTAAAACTCAAAGGAATTGACGGGGGCCCGCACAAGCGGTGGAGCATGTGGTTTAATTCGAAGCAACGCGCAGAACCTTACCACCTTTTGACATGCCCGGACCGGTGCAGAGATGCACTTTTCCCTTCGGGGACTGGGACACAGGTGCTGCATGGCTGTCGTCAGCTCGTGTCGTGAGATGTTGGGTTAAGTCCCGCAACGAGCGCAACCCTCGCTGTTAGTTGCCATCAGGTTTGGCTGGGCACTCTAACAGTACTGCCGAGGTTAACTCG
A	rhizo	III	small yield loss	Bacteria	Proteobacteria	NA	NA	NA	ASV_547	no	GGTAGTCCACGCTGTAAACGATGAGTGCTAGACGTCGGGGAGCTTGCTCTTCGGTGTCGCCGCTAACGCATTAAGCACTCCGCCTGGGGAGTACGGTCGCAAGATTAAAACTCAAAGGAATTGACGGGGGCCCGCACAAGCGGTGGAGCATGTGGTTTAATTCGAAGCAACGCGCAGAACCTTACCAGCCCTTGACATGGGACGTATGGGATTTGGAAACAGATCTCTTCAGTTCGGCTGGCGTCCACACAGGTGCTGCATGGCTGTCGTCAGCTCGTGTCGTGAGATGTTGGGTTAAGTCCCGCAACGAGCGCAACCCTCATCTTCAGTTGCCAACGGGTAGAGCTGGGCACTCTGGAGAAACTGCCGGTGACAAGCCG
A	rhizo	V	small yield loss	Bacteria	Proteobacteria	Pseudomonadales	Pseudomonas	NA	ASV_51	yes	GGTAGTCCACGCCGTAAACGATGTCAACTAGCCGTTGGGAGCCTTGAGCTCTTAGTGGCGCAGCTAACGCATTAAGTTGACCGCCTGGGGAGTACGGCCGCAAGGTTAAAACTCAAATGAATTGACGGGGGCCCGCACAAGCGGTGGAGCATGTGGTTTAATTCGAAGCAACGCGAAGAACCTTACCAGGCCTTGACATCCAATGAACTTTCCAGAGATGGATTGGTGCCTTCGGGAACATTGAGACAGGTGCTGCATGGCTGTCGTCAGCTCGTGTCGTGAGATGTTGGGTTAAGTCCCGTAACGAGCGCAACCCTTGTCCTTAGTTACCAGCACGTAATGGTGGGCACTCTAAGGAGACTGCCGGTGACAAACCG	CCGGGAACGTATTCACCGCGACATTCTGATTCGCGATTACTAGCGATTCCGACTTCACGCAGTCGAGTTGCAGACTGAGATCCGGACTACGATCGGTTTTGTGGGATTAGCTCCACCTCGCGGCTTGGCAACCCTCTGTACCGACCATTGTAGCACGTGTGTAGCCCAGGCCGTAAGGGCCATGATGACTTGACGTCATCCCCACCTTCCTCCGGTTTGTCACCGGCAGTCTCCTTAGAGTGCCCACCATTACGTGCTGGTAACTAAGGACAAGGGTTGCGCTCGTTACGGGACTTAACCCAACATCTCACGACACGAGCTGACGACAGCCATGCAGCACCTGTCTCAATGTTCCCGAAGGCACCAATCCATCTCTGGAAAGTTCATTGGATGTCAAGG…	Pseudomonas	149 KA
A	rhizo	VI	/	Bacteria	Proteobacteria	Rhizobiales	NA	NA	ASV_112	no	GGTAGTCCACGCTGTAAACGATGGATGCTAGCCGTTGGCGAGCTTGCTCGTCAGTGGCGCAGCTAACGCTTTAAGCATCCCGCCTGGGGAGTACGGTCGCAAGATTAAAACTCAAAGGAATTGACGGGGGCCCGCACAAGCGGTGGAGCATGTGGTTCAATTCGAAGCAACGCGCAGAACCTTACCAGCCCTTGACATCCCGGTCGCGGAGAGCAGAGACGCACTCCTTCAGTTCGGCTGGACCGGAGACAGGTGCTGCATGGCTGTCGTCAGCTCGTGTCGTGAGATGTTGGGTTAAGTCCCGCAACGAGCGCAACCCTCGCCCTTAGTTGCCATCATTTAGTTGGGCACTCTAAGGGGACTGCCGGTGATAAGCCG
A	rhizo	VI	/	Bacteria	Proteobacteria	Rhizobiales	NA	NA	ASV_257	no	GGTAGTCCACGCCGTAAACGATGGATGCTAGCCGTTGGTGGGTTTACCCTTCAGTGGCGCAGCTAACGCATTAAGCATCCCGCCTGGGGAGTACGGTCGCAAGATTAAAACTCAAAGGAATTGACGGGGGCCCGCACAAGCGGTGGAGCATGTGGTTCAATTCGAAGCAACGCGCAGAACCTTACCAGCCTTTGACATCCCGGTCGCGAGCACCAGAGATGGAGCTCTTCAGTTCGGCTGGACCGGAGACAGGTGCTGCATGGCTGTCGTCAGCTCGTGTCGTGAGATGTTGGGTTAAGTCCCGCAACGAGCGCAACCCTCGCCCTTAGTTGCCATCATTTAGTTGGGCACTCTAAGGGGACTGCCGGTGATAAGCCG
A	rhizo	VI	/	Bacteria	Proteobacteria	Rhizobiales	NA	NA	ASV_273	no	GGTAGTCCACGCCGTAAACTATGGGTGCTAGCCGTCGGGGAGCATGCTCTTCGGTGGCGCAGCAAACGCATTAAGCACCCCGCCTGGGGAGTACGGTCGCAAGATTAAAACTCAAAGGAATTGACGGGGGCCCGCACAAGCGGTGGAGCATGTGGTTTAATTCGAGGCAACGCGAAGAACCTTACCAGCCCTTGACTTCCCGATCGGGGGACCAGAGATGGACCTCTTCAATTGGTCGGTGACAGGTGCTGCATGGCTGTCGTCAGCTCGTGTCGTGAGATGTTGGGTTAAGTCCCGCAACGAGCGCAACCCCTGCCATTAGTTGCCATCATTAAGTTGGGCACTCTAGTGGGACTGCCGGTGATAAGCCG
A	rhizo	VI	/	Bacteria	Proteobacteria	Rhizobiales	Bradyrhizobium	NA	ASV_38	no	GGTAGTCCACGCCGTAAACGATGAATGCCAGCCGTTAGTGGGTTTACTCACTAGTGGCGCAGCTAACGCTTTAAGCATTCCGCCTGGGGAGTACGGTCGCAAGATTAAAACTCAAAGGAATTGACGGGGGCCCGCACAAGCGGTGGAGCATGTGGTTTAATTCGACGCAACGCGCAGAACCTTACCAGCCCTTGACATCCCGGTCGCGGACTCCAGAGATGGAGTTCTTCAGTTCGGCTGGACCGGAGACAGGTGCTGCATGGCTGTCGTCAGCTCGTGTCGTGAGATGTTGGGTTAAGTCCCGCAACGAGCGCAACCCCCGTCCTTAGTTGCTACCATTTAGTTGAGCACTCTAAGGAGACTGCCGGTGATAAGCCGC
A	rhizo	I	/	Bacteria	Proteobacteria	Rhizobiales	Rhodopseudomonas	NA	ASV_533	no	GGTAGTCCACGCCGTAAACGATGAATGCCAGCCGTTAGTGGGTTTACTCACTAGTGGCGCAGCTAACGCTTTAAGCATTCCGCCTGGGGAGTACGGTCGCAAGATTAAAACTCAAAGGAATTGACGGGGGCCCGCACAAGCGGTGGAGCATGTGGTTTAATTCGACGCAACGCGCAGAACCTTACCAGCCCTTGACATGTCTAGGACCGGTCGCAGAGATGTGACCTTCTCTTCGGAGCCTAGAGCACAGGTGCTGCATGGCTGTCGTCAGCTCGTGTCGTGAGATGTTGGGTTAAGTCCCGCAACGAGCGCAACCCCCGTCCTTAGTTGCTACCATTTAGTTGAGCACTCTAAGGAGACTGCCGGTGATAAGCCGC
A	rhizo	I	/	Bacteria	Proteobacteria	Sphingomonadales	Sphingomonas	NA	ASV_1009	no	GGTAGTCCACGCCGTAAACGATGATGACTAGCTGTCGGGGCGCTTAGCGTTTCGGTGGCGCAGCTAACGCGTTAAGTCATCCGCCTGGGGAGTACGGCCGCAAGGTTAAAACTCAAAGAAATTGACGGGGGCCTGCACAAGCGGTGGAGCATGTGGTTTAATTCGAAGCAACGCGCAGAACCTTACCAGCGTTTGACATGGTAGGACGGTTTCCAGAGATGGATTCCTTCCCTTACGGGACCTACACACAGGTGCTGCATGGCTGTCGTCAGCTCGTGTCGTGAGATGTTGGGTTAAGTCCCGCAACGAGCGCAACCCTCGTCTCTAGTTGCTACCATTTAGTTGGGCACTCTAGAGAAACTGCCGGTGATAAGCCG
A	rhizo	I	/	Bacteria	Proteobacteria	Sphingomonadales	Sphingomonas	NA	ASV_1011	no	GGTAGTCCACGCTGTAAACGATGATGACTAGCTGTCGGGGCTCTTGGAGTTTCGGTGGCGCAGCTAACGCGTTAAGTCATCCGCCTGGGGAGTACGGCCGCAAGGTTAAAACTCAAAGAAATTGACGGGGGCCTGCACAAGCGGTGGAGCATGTGGTTTAATTCGAAGCAACGCGCAGAACCTTACCAGCGTTTGACATGGTAGGACGGTTTCCAGAGATGGATTCCTTCCCTTACGGGACCTACACACAGGTGCTGCATGGCTGTCGTCAGCTCGTGTCGTGAGATGTTGGGTTAAGTCCCGCAACGAGCGCAACCCTCGTCTTTAGTTGCCAGCATTCAGTTGGGCACTCTAAAGAAACTGCCGGTGATAAGCCG
A	rhizo	II	high yield loss	Bacteria	Proteobacteria	Sphingomonadales	Sphingomonas	NA	ASV_1074	no	GGTAGTCCACGCCGTAAACGATGATAACTAGCTGTCAGGGCTCTTAGAGCTTTGGTGGCGCAGCTAACGCATTAAGTTATCCGCCTGGGGAGTACGGCCGCAAGGTTAAAACTCAAATGAATTGACGGGGGCCTGCACAAGCGGTGGAGCATGTGGTTTAATTCGAAGCAACGCGCAGAACCTTACCAGCGTTTGACATGTCCGGACGATTTCCAGAGATGGATCTCTTCCCTTCGGGGACTGGAACACAGGTGCTGCATGGCTGTCGTCAGCTCGTGTCGTGAGATGTTGGGTTAAGTCCCGCAACGAGCGCAACCCTCGCCTTTAGTTACCATCATTTAGTTGGGTACTCTAAAGGAACCGCCGGTGATAAGCCG
A	rhizo	VI	/	Bacteria	Proteobacteria	Sphingomonadales	Sphingomonas	NA	ASV_225	no	GGTAGTCCACGCCGTAAACGATGATAACTAGCTGTCTGGGTACTTGGTACTTAGGTGGCGCAGCTAACGCATTAAGTTATCCGCCTGGGGAGTACGGCCGCAAGGTTAAAACTCAAATGAATTGACGGGGGCCTGCACAAGCGGTGGAGCATGTGGTTTAATTCGAAGCAACGCGCAGAACCTTACCAGCGTTTGACATGTCCGGACGATTTCCAGAGATGGATCTCTTCCCTTCGGGGACTGGAACACAGGTGCTGCATGGCTGTCGTCAGCTCGTGTCGTGAGATGTTGGGTTAAGTCCCGCAACGAGCGCAACCCTCGCCTTTAGTTACCATCATTTAGTTGGGTACTCTAAAGGAACCGCCGGTGATAAGCCG
A	rhizo	VI	/	Bacteria	Proteobacteria	Sphingomonadales	Sphingomonas	NA	ASV_245	no	GGTAGTCCACGCCGTAAACGATGATGACTAGCTGTCGGGGCTCATGGAGTTTCGGTGGCGCAGCTAACGCGTTAAGTCATCCGCCTGGGGAGTACGGCCGCAAGGTTAAAACTCAAAGAAATTGACGGGGGCCTGCACAAGCGGTGGAGCATGTGGTTTAATTCGAAGCAACGCGCAGAACCTTACCAGCGTTTGACATGGTAGGACGGTTTCCAGAGATGGATTCCTTCCCTTACGGGACCTACACACAGGTGCTGCATGGCTGTCGTCAGCTCGTGTCGTGAGATGTTGGGTTAAGTCCCGCAACGAGCGCAACCCTCGTCTTTAGTTGCCATCATTTAGTTGGGCACTCTAAAGAAACTGCCGGTGATAAGCCG
A	rhizo	II	high yield loss	Bacteria	Proteobacteria	Sphingomonadales	Sphingobium	Sphingobium herbicidovorans	ASV_283	no	GGTAGTCCACGCCGTAAACGATGATAACTAGCTGCTGGGGTGCATGGCATTTCAGTGGCGCAGCTAACGCATTAAGTTATCCGCCTGGGGAGTACGGTCGCAAGATTAAAACTCAAAGGAATTGACGGGGGCCTGCACAAGCGGTGGAGCATGTGGTTTAATTCGAAGCAACGCGCAGAACCTTACCAACGTTTGACATCCCTATCGCGGATCGTGGAGACACTTTCCTTCAGTTCGGCTGGATAGGTGACAGGTGCTGCATGGCTGTCGTCAGCTCGTGTCGTGAGATGTTGGGTTAAGTCCCGCAACGAGCGCAACCCTCGCCTTTAGTTGCCATCATTTAGTTGGGTACTCTAAAGGAACCGCCGGTGATAAGCCG
A	rhizo	II	high yield loss	Bacteria	Proteobacteria	Sphingomonadales	Sphingobium	NA	ASV_300	no	GGTAGTCCACGCCGTAAACGATGATAACTAGCTGTCAGGGCACATGGTGTTTTGGTGGCGCAGCTAACGCATTAAGTTATCCGCCTGGGGAGTACGGTCGCAAGATTAAAACTCAAAGGAATTGACGGGGGCCTGCACAAGCGGTGGAGCATGTGGTTTAATTCGAAGCAACGCGCAGAACCTTACCAGCGTTTGACATCCTCATCGCGATTTCCAGAGATGGATTTCTTCAGTTCGGCTGGATGAGTGACAGGTGCTGCATGGCTGTCGTCAGCTCGTGTCGTGAGATGTTGGGTTAAGTCCCGCAACGAGCGCAACCCTCGACTTTAGTTGCCAGCATTGAGTTGGGTACTCTAAAGTAACCGCCGGTGATAAGCCG
A	rhizo	II	/	Bacteria	Proteobacteria	Sphingomonadales	Sphingomonas	NA	ASV_489	no	GGTAGTCCACGCCGTAAACGATGATGACTAGCTGTCGGAGCGCTTAGCGTTTCGGTGGCGCAGCTAACGCGTTAAGTCATCCGCCTGGGGAGTACGGCCGCAAGGTTAAAACTCAAAGAAATTGACGGGGGCCTGCACAAGCGGTGGAGCATGTGGTTTAATTCGAAGCAACGCGCAGAACCTTACCAGCGTTTGACATGGTAGGACGGTTTCCAGAGATGGATTCCTTCCCTTACGGGACCTACACACAGGTGCTGCATGGCTGTCGTCAGCTCGTGTCGTGAGATGTTGGGTTAAGTCCCGCAACGAGCGCAACCCTCGTCTTTAGTTGCCATCATTTAGTTGGGCACTCTAAAGAAACTGCCGGTGATAAGCCG
A	rhizo	I	/	Bacteria	Proteobacteria	Sphingomonadales	Sphingomonas	NA	ASV_619	no	GGTAGTCCACGCCGTAAACGATGATGACTAGCTGTCCGGGCACTTAGTGCTTGGGTGGCGCAGCTAACGCGTTAAGTCATCCGCCTGGGGAGTACGGCCGCAAGGTTAAAACTCAAAGAAATTGACGGGGGCCTGCACAAGCGGTGGAGCATGTGGTTTAATTCGAAGCAACGCGCAGAACCTTACCAGCGTTTGACATGGTAGGACGGCTTCCAGAGATGGATTCCTTCCCTTACGGGACCTACACACAGGTGCTGCATGGCTGTCGTCAGCTCGTGTCGTGAGATGTTGGGTTAAGTCCCGCAACGAGCGCAACCCTCGTCTTTAGTTGCCATCATTTAGTTGGGCACTCTAGAGAAACTGCCGGTGATAAGCCG
A	rhizo	V	/	Bacteria	Proteobacteria	Sphingomonadales	Sphingomonas	NA	ASV_660	no	GGTAGTCCACGCCGTAAACGATGATAACTAGCTGTCGGGGCTCTTAGAGCTTCGGTGGCGCAGCTAACGCATTAAGTTATCCGCCTGGGGAGTACGGCCGCAAGGTTAAAACTCAAAGGAATTGACGGGGGCCTGCACAAGCGGTGGAGCATGTGGTTTAATTCGAAGCAACGCGCAGAACCTTACCAGCGTTTGACATGTCCGGACGATTTCCAGAGATGGATCTCTTCCCTTCGGGGACTGGAACACAGGTGCTGCATGGCTGTCGTCAGCTCGTGTCGTGAGATGTTGGGTTAAGTCCCGCAACGAGCGCAACCCTCGCCTTTAGTTACCATCATTTAGTTGGGTACTCTAAAGGAACCGCCGGTGATAAGCCG
A	rhizo	I	/	Bacteria	Proteobacteria	Sphingomonadales	Altererythrobacter	NA	ASV_666	no	GGTAGTCCACGCCGTAAACGATGATAACTAGCTGTCCGGGCTCATGGAGCTTGGGTGGCGCAGCTAACGCATTAAGTTATCCGCCTGGGGAGTACGGTCGCAAGATTAAAACTCAAAGGAATTGACGGGGGCCTGCACAAGCGGTGGAGCATGTGGTTTAATTCGAAGCAACGCGCAGAACCTTACCAGCTTTTGACATCCTGGTCGCGGGGAGAGGAGACTCACCCCTTCAGTTCGGCTGGACCAGTGACAGGTGCTGCATGGCTGTCGTCAGCTCGTGTCGTGAGATGTTGGGTTAAGTCCCGCAACGAGCGCAACCCTCGTCCTTAGTTGCCATCATTTAGTTGGGCACTCTAAGGAAACCGCCGGTGATAAGCCG
A	rhizo	I	/	Bacteria	Proteobacteria	Sphingomonadales	Sphingomonas	NA	ASV_668	no	GGTAGTCCACGCCGTAAACGATGATGACTAGCTGTCGGGGCTCATGGAGTTTCGGTGGCGCAGCTAACGCGTTAAGTCATCCGCCTGGGGAGTACGGCCGCAAGGTTAAAACTCAAAGAAATTGACGGGGGCCTGCACAAGCGGTGGAGCATGTGGTTTAATTCGAAGCAACGCGCAGAACCTTACCAGCGTTTGACATGGTAGGACGGCTTCCAGAGATGGATTCCTTCCCTTACGGGACCTACACACAGGTGCTGCATGGCTGTCGTCAGCTCGTGTCGTGAGATGTTGGGTTAAGTCCCGCAACGAGCGCAACCCTCGTCTTTAGTTGCCATCATTCAGTTGGGCACTCTAAAGAAACTGCCGGTGATAAGCCG
A	rhizo	II	high yield loss	Bacteria	Proteobacteria	Sphingomonadales	Sphingomonas	NA	ASV_737	no	GGTAGTCCACGCCGTAAACGATGATGACTAGCTGTCGGGGCGCTTAGCGTTCCGGTGGCGCAGCTAACGCGTTAAGTCATCCGCCTGGGGAGTACGGCCGCAAGGTTAAAACTCAAAGAAATTGACGGGGGCCTGCACAAGCGGTGGAGCATGTGGTTTAATTCGAAGCAACGCGCAGAACCTTACCAGCGTTTGACATGCCAGGACGGTTTCCAGAGATGGATTCCTTCCCTTACGGGACCTGGACACAGGTGCTGCATGGCTGTCGTCAGCTCGTGTCGTGAGATGTTGGGTTAAGTCCCGCAACGAGCGCAACCCTCGTCTTTAGTTGCCATCATTCAGTTGGGCACTCTAAAGAAACTGCCGGTGATAAGCCG
A	rhizo	II	high yield loss	Bacteria	Proteobacteria	Xanthomonadales	Arenimonas	NA	ASV_263	no	GGTAGTCCACGCCCTAAACGATGCGAACTGGACGTTGGGAGCAACTAGGCTCTCAGTGTCGAAGCTAACGCGTTAAGTTCGCCGCCTGGGGAGTACGGTCGCAAGACTGAAACTCAAAGGAATTGACGGGGGCCCGCACAAGCGGTGGAGTATGTGGTTTAATTCGATGCAACGCGAAGAACCTTACCTGGTCTTGACATCCACGGAAGTCTGCAGAGATGCGGATGTGCCTTCGGGAACCGTGAGACAGGTGCTGCATGGCTGTCGTCAGCTCGTGTCGTGAGATGTTGGGTTAAGTCCCGCAACGAGCGCAACCCTTGTCCTTAGTTGCCAGCGAGTAATGTCGGGAACTCTAAGGAGACTGCCGGTGACAAACCG
A	rhizo	III	small yield loss	Bacteria	Proteobacteria	Xanthomonadales	NA	NA	ASV_407	yes	GGTAGTCCACGCCCTAAACGATGCGAACTGGATGTTGGTCTCAACTCGGAGATCAGTGTCGAAGCTAACGCGTTAAGTTCGCCGCCTGGGGAGTACGGTCGCAAGACTGAAACTCAAAGGAATTGACGGGGGCCCGCACAAGCGGTGGAGTATGTGGTTTAATTCGATGCAACGCGAAGAACCTTACCTGGCCTTGACATGTCCGGAATCCAGCAGAGATGCAGGAGTGCCTTCGGGAATCGGAACACAGGTGCTGCATGGCTGTCGTCAGCTCGTGTCGTGAGATGTTGGGTTAAGTCCCGCAACGAGCGCAACCCTTGTCCTTAGTTGCCAGCACGTAATGGTGGGAACTCTAAGGAGACTGCCGGTGACAAACCG	GCGACTGGAATGTTGGTCTCACTCGGAGATCAGTGTCGAAGCTAACGCGTTAAGTTCGCCGCCTGGGGAGTACGGTCGCAAGACTGAAACTCAAAGGAATTGACGGGGGCCCGCACAAGCGGTGGAGTATGTGGTTTAATTCGATGCAACGCGAAGAACCTTACCTGGCCTTGACATGTCCGGAATCCAGCAGAGATGCAGGAGTGCCTTCGGGAATCGGAACACAGGTGCTGCATGGCTGTCGTCAGCTCGTGTCGTGAGATGTTGGGTTAAGTCCCGCAACGAGCGCAACCCTTGTCCTTAGTTGCCAGCACGTAATGGTGGGAACTCTAAGGAGACTGCCGGTGACAAACCGGAGGAAGGTGGGGATGACGTCAAGTCATCATGGCCCTTACGGCC…	Rhodanobacter sp.	147 D
A	rhizo	III	small yield loss	Bacteria	Proteobacteria	Xanthomonadales	NA	NA	ASV_465	no	GGTAGTCCACGCCCTAAACGATGCGAACTGGATGTTGGTCTCAACTCGGAGATCAGTGTCGAAGCTAACGCGTTAAGTTCGCCGCCTGGGGAGTACGGTCGCAAGACTGAAACTCAAAGGAATTGACGGGGGCCCGCACAAGCGGTGGAGTATGTGGTTTAATTCGATGCAACGCGAAGAACCTTACCTGGCCTTGACATGTCCGGAATCCTGCAGAGATGCGGGAGTGCCTTCGGGAATCGGAACACAGGTGCTGCATGGCTGTCGTCAGCTCGTGTCGTGAGATGTTGGGTTAAGTCCCGCAACGAGCGCAACCCTTGTCCTTAGTTGCCAGCGAGTAATGTCGGGAACTCTAAGGAGACTGCCGGTGACAAACCG
A	rhizo	I	/	Bacteria	Verrucomicrobia	Chthoniobacterales	Candidatus_Udaeobacter	NA	ASV_1504	no	GGTAGTCCTGGCAGTAAACGGTGCACGTTTGGTGTGGGAGGATTCGACCCCTTCCGCGCCGGAGCTAACGCGTTAAACGTGCCGCCTGGGGAGTACGGTCGCAAGATTAAAACTCAAAGAAATTGACGGGGGCCCGCACAAGCGGTGGAGTATGTGGCTTAATTCGATGCAACGCGAAGAACCTTACCTGGCCTTGACATGTATCTCTAAGCACGTGAAAGCGTGTGAGTCTCGAAAGAGACAATTTACACAGGTGCTGCATGGCTGTCGTCAGCTCGTGTCGTGAGATGTTGGGTTAAGTCCCGCAACGAGCGCAACCCCTGTGAACTGTTGCCACGTCCTTGATTGGACAGCACTCTGTTCAGACTGCCCTGTGAAACGGG
A	rhizo	II	/	Bacteria	Verrucomicrobia	Chthoniobacterales	Candidatus_Udaeobacter	NA	ASV_967	no	GGTAGTCCTGGCAGTAAACGGTGCACGTTTGGTGTGGGAGGATTCGACCCCTTCCGCGCCGGAGCTAACGCGTTAAACGTGCCGCCTGGGGAGTACGGTCGCAAGATTAAAACTCAAAGAAATTGACGGGGGCCCGCACAAGCGGTGGAGTATGTGGCTTAATTCGATGCAACGCGAAGAACCTTACCTGGCCTTGACATGCATCTCTAAGCGCGTGAAAGCGCGTGACTCCCGAAAGGGAGAATTTGCACAGGTGCTGCATGGCTGTCGTCAGCTCGTGTCGTGAGATGTTGGGTTAAGTCCCGCAACGAGCGCAACCCCTGTGAACTGTTGCCACGTCCTTGATTGGACAGCACTCTGTTCAGACTGCCCTGTGAAACGGG
A	rhizo	V	small yield loss	Bacteria	Verrucomicrobia	Pedosphaerales	NA	NA	ASV_2666	no	GGTAGTCTTGGCTGTAAACGGTGCGCATTTGCTGTAAACGGAATCGACCCCGTTTGTGGCGAAGCTAACGCGATAAATGCGCCGCCTGGGAAGTACGGTCGCAAGATTAAAACTCAAAGAAATTGACGGGGGCCTGCACAAGCGGTGGAGTATGTGGCTTAATTCGATGCAACGCGAAGAACCTTACCTGGCCTTGACATGCAAGTGGTAGAACCATGAAAGTGGGACGACCCCGCAAGGGGAGCTTGCACAGGTGCTGCATGGCTGTCGTCAGCTCGTGTCGTGAGATGTTGGGTTAAGTCCCGCAACGAGCGCAACCCTTGTGTCCTGTTGCCACCCCTTCGAGAGAAGGGAGCACTCTGGACAGACTGCCTCGCTTAAACGAG
B	rhizo	II	high yield loss	Fungi	Ascomycota	Helotiales	Tetracladium	NA	ASV_419	no	CCGAGTTCATGCCCTCACGGGTAGATCTCCCACCCTTTGTATACCTTACCTTTGTTGCTTTGGCGGGCCGCCTAGCTACTGGCTTCGGCTGGTAAGTGCCCGCCGGAGAACCCCAAACCCAAACCATTTATAGTGTCGTCTGAGTAAAATTTTAATATTTA
B	rhizo	I	/	Fungi	Ascomycota	Myrmecridiales	Myrmecridium	NA	ASV_42	no	CGAGAGTGTCACCACTCCCAACCCATTGTTTACCTACCCGTCCACCGTGCTTCGGCAGGCAGTCCTGTGGGACAGGGCCTCGCCCCCTCCGGGGGGTGCCTGCCGCTGGCCAACCAACCATTCTAGCTGTTTTTGTACCATCTGAGTCTTCCACAAATAAACA..
B	rhizo	I	small yield loss	Fungi	Ascomycota	Sordariales	Trichocladium	opacum	ASV_44	no	ATGGTGCTTGCAGAAATGCTTGCACGGCGGCGGCCTTAAAACGCGCCAAATGGCACCCTTTGTTTACGAGTACCGTTCGTTTCCTCGGTGGGCTTGCCTGCCATGAGGACCAACAAAAACCTTTTGTAGTAGCAGTATCTTCAGTAAAAACAAATATTA
B	rhizo	II	/	Fungi	Ascomycota	Venturiales	NA	NA	ASV_393	no	ATGGGTTAACGCCTCCGGGCACAATCCCCACCCTTTGTAACCGCGGCCCGGATTCGGCGCCTGGCGGGGAGCCCCCTCTGCTCGCGGAGGGCCCCGCCTGCCGGAATTAGCCAACCCTGCCTAGAAAATTGAAGTCTGAGAACAAGTTAAATTAAACA
B	rhizo	II	high yield loss	Fungi	Ascomycota	Xylariales	Microdochium	NA	ASV_18	no	CTGAGTTTTTAACTCTCCAAACCATGTGAACTTACCACTGTTGCCTCGGTGGCTGGTGCTGGAAACAGTGCTGCCACCGGTGGACTACTAAACTCTTGTTAATTTTTGTCAAATCTGAATCAAACTAAGAAATAAGTTA
B	rhizo	I	/	Fungi	Basidiomycota	Filobasidiales	Solicoccozyma	aeria	ASV_48	no	GTGAATTAAACATGCTTGGTGTCTTCGCTTCGGCAAGGCCCTTGCTTAACTCACATCCCAACACCTGTGAACTGTAAGGCGCATGACTAGGTTCGCCCAGTCATCGTCTGCCCTTTTTAACAAACAATTAATGTAACAAACGTAGTCTTATTATAACCTAATA..
B	rhizo	I	small yield loss	Fungi	Mortierellomycota	Mortierellales	Mortierella	hyalina	ASV_24	no	TAATAAGTGTTTTATGGCACTTTTTTAAATCCATATCCACCTTGTGTGCAATGTCAGGGTTGGTTTCTCTCTTTTGAGAGATCAACCCCAAACATCAACTCTATCTTAACTCTTTGTCTGAAAAATATTATGAATAAAACAATTCAAAATA
B	rhizo	II	high yield loss	Fungi	Mortierellomycota	Mortierellales	NA	NA	ASV_243	no	AAATGGTATCCAGTAATGGATTTACTCCAATCTTTGTGCATTGAAATCGGCATCTGTCAAAGGATGTTGGTTTTGAAAGTAACCTTCAAAATAATCATTGTCTGAACATATCTTGAATACTTAATTCAAAATA
B	rhizo	I	/	Fungi	Mortierellomycota	Mortierellales	Mortierella	gamsii	ASV_35	no	TAATAAGTGTTTTATGGCACTTTTTAAATCCATATCCACCTTGTGTGCAATGTCAGTTGTTCTCTTTTTTGAGAATGACCAAACATCAACTTAAATTTTAACTCTTTGTCTGAAAAATATTATGAATAAAATAATTCAAAATA..
B	rhizo	II	high yield loss	Fungi	NA	NA	NA	NA	ASV_197	no	CATAATAGTTGATTGTGTGCGCAAGCACTAATCTCCCAAATCCTTGTGAACCGTAATTGACACCTTTGGTGTGTGCGCAAGCGCATGCCAAACGGTAACAACAACCAAAAACACTTGTTAAACACGTAAAGACTTATCGATTTATTATACAAATCTAAATA
C	root	III	/	Bacteria	Actinobacteria	Corynebacteriales	Lawsonella	NA	ASV_231	no	GGTAGTCCATGCCGTAAACGGTGGGCGCTAGGTGTGGGGTTCCTTCCACGGGCTCCGCGCCGTAGCTAACGCATTAAGCGCCCCGCCTGGGGAGTACGGCCGCAAGGCTAAAACTCAAAGAAATTGACGGGGGCCCGCACAAGCGGCGGAGCATGTGGATTAATTCGATGCAACGCGAAGAACCTTACCTGGGCTTGACATATAGAGGATCGCTACAGAGATGTGGTTTCCCTTGTGGCTTCTATACAGGTGGTGCATGGTTGTCGTCAGCTCGTGTCGTGAGATGTTGGGTTAAGTCCCGCAACGAGCGCAACCCTTGTCTTATGTTGCCAGCACGTTATGGTGGGGACTCGTGAGAGACTGCCGGGGTCAACTCG
C	root	V	small yield loss	Bacteria	Actinobacteria	Corynebacteriales	Nocardia	Nocardia vinacea	ASV_265	no	GGTAGTCCACGCCGTAAACGGTGGGTACTAGGTGTGGGTTTCCTTCCACGGGATCCGTGCCGTAGCTAACGCATTAAGTACCCCGCCTGGGGAGTACGGCCGCAAGGCTAAAACTCAAAGGAATTGACGGGGGCCCGCACAAGCGGCGGAGCATGTGGATTAATTCGATGCAACGCGAAGAACCTTACCTGGGTTTGACATACACCAGAAAGCGGCAGAGATGTCGCCCCCCTTGTGGTTGGTGTACAGGTGGTGCATGGCTGTCGTCAGCTCGTGTCGTGAGATGTTGGGTTAAGTCCCGCAACGAGCGCAACCCTTATCTTATGTTGCCAGCGCGTTATGGCGGGGACTCGTGAGAGACTGCCGGGGTCAACTCG
C	root	V	small yield loss	Bacteria	Actinobacteria	Corynebacteriales	Nocardia	NA	ASV_642	no	GGTAGTCCACGCCGTAAACGGTGGGTACTAGGTGTGGGTTTCCTTCCACGGGATCCGTGCCGTAGCTAACGCATTAAGTACCCCGCCTGGGGAGTACGGCCGCAAGGCTAAAACTCAAAGGAATTGACGGGGGCCCGCACAAGCGGCGGAGCATGTGGATTAATTCGATGCAACGCGAAGAACCTTACCTGGGTTTGACATACACCAGAAAGCTATAGAGATATAGCCCCCCTTGTGGTTGGTGTACAGGTGGTGCATGGCTGTCGTCAGCTCGTGTCGTGAGATGTTGGGTTAAGTCCCGCAACGAGCGCAACCCTTATCTTATGTTGCCAGCGCGTTATGGCGGGGACTCGTGAGAGACTGCCGGGGTCAACTCG
C	root	I	high yield loss	Bacteria	Actinobacteria	Corynebacteriales	Rhodococcus	NA	ASV_683	no	GGTAGTCCACGCCGTAAACGGTGGGCGCTAGGTGTGGGTTCCTTCCACGGGATCTGTGCCGTAGCTAACGCATTAAGCGCCCCGCCTGGGGAGTACGGCCGCAAGGCTAAAACTCAAAGGAATTGACGGGGGCCCGCACAAGCGGCGGAGCATGTGGATTAATTCGATGCAACGCGAAGAACCTTACCTGGGTTTGACATACACCGGAAAACCGTAGAGATACGGTCCCCCTTGTGGTCGGTGTACAGGTGGTGCATGGCTGTCGTCAGCTCGTGTCGTGAGATGTTGGGTTAAGTCCCGCAACGAGCGCAACCCTTGTCTTATGTTGCCAGCACGTAATGGTGGGGACTCGTAAGAGACTGCCGGGGTCAACTCG
C	root	III	/	Bacteria	Actinobacteria	Micrococcales	Arthrobacter	NA	ASV_16	no	GGTAGTCCATGCCGTAAACGTTGGGCACTAGGTGTGGGGGACATTCCACGTTTTCCGCGCCGTAGCTAACGCATTAAGTGCCCCGCCTGGGGAGTACGGCCGCAAGGCTAAAACTCAAAGGAATTGACGGGGGCCCGCACAAGCGGCGGAGCATGCGGATTAATTCGATGCAACGCGAAGAACCTTACCAAGGCTTGACATGGGCCGGACCGGGCTGGAAACAGTCCTTCCCCTTTGGGGCCGGTTCACAGGTGGTGCATGGTTGTCGTCAGCTCGTGTCGTGAGATGTTGGGTTAAGTCCCGCAACGAGCGCAACCCTCGTTCCATGTTGCCAGCGCGTAATGGCGGGGACTCATGGGAGACTGCCGGGGTCAACTCG
C	root	II	/	Bacteria	Actinobacteria	Micrococcales	Cellulomonas	NA	ASV_243	no	GGTAGTCCATGCCGTAAACGTTGGGCACTAGGTGTGGGGCTCATTCCACGAGTTCCGTGCCGCAGCAAACGCATTAAGTGCCCCGCCTGGGGAGTACGGCCGCAAGGCTAAAACTCAAAGAAATTGACGGGGGCCCGCACAAGCGGCGGAGCATGCGGATTAATTCGATGCAACGCGAAGAACCTTACCAAGGCTTGACATACACCGGAAACTTCCAGAGATGGTTGCCCCGCAAGGTCGGTGTACAGGTGGTGCATGGTTGTCGTCAGCTCGTGTCGTGAGATGTTGGGTTAAGTCCCGCAACGAGCGCAACCCTCGTCCCATGTTGCCAGCGGGTTATGCCGGGGACTCATGGGAGACTGCCGGGGTCAACTCG
C	root	I	high yield loss	Bacteria	Actinobacteria	Micrococcales	NA	NA	ASV_305	no	GGTAGTCCATGCCGTAAACGTTGGGCGCTAGATGTGGGGACCATTCCACGGTTTCCGTGTCGCAGCTAACGCATTAAGCGCCCCGCCTGGGGAGTACGGCCGCAAGGCTAAAACTCAAAGGAATTGACGGGGGCCCGCACAAGCGGCGGAGCATGCGGATTAATTCGATGCAACGCGAAGAACCTTACCAAGGCTTGACATTTACGAGAACGCTGCAGAAATGTAGAACTCTTTGGACACTCGTAAACAGGTGGTGCATGGTTGTCGTCAGCTCGTGTCGTGAGATGTTGGGTTAAGTCCCGCAACGAGCGCAACCCTCGTTCTATGTTGCCAGCGCGTTATGGCGGGAACTCATAGGAGACTGCCGGGGTCAACTCG
C	root	II	small yield loss	Bacteria	Actinobacteria	Micrococcales	Terrabacter	NA	ASV_43	no	GGTAGTCCATGCCGTAAACGTTGGGAACTAGGTGTGGGTCTCATTCCACGAGATCCGTGCCGCAGCTAACGCATTAAGTTCCCCGCCTGGGGAGTACGGCCGCAAGGCTAAAACTCAAAGGAATTGACGGGGGCCCGCACAAGCGGCGGAGCATGCGGATTAATTCGATGCAACGCGAAGAACCTTACCAAGGCTTGACATACACCGGAATCACTCAGAGATGGGTGCGTCTTCGGACTGGTGTACAGGTGGTGCATGGTTGTCGTCAGCTCGTGTCGTGAGATGTTGGGTTAAGTCCCGCAACGAGCGCAACCCTCGTTCTATGTTGCCAGCACGTCATGGTGGGGACTCATAGGAGACTGCCGGGGTCAACTCG
C	root	III	/	Bacteria	Actinobacteria	Propionibacteriales	Cutibacterium	Cutibacterium acnes	ASV_116	no	GGTAGTCCACGCTGTAAACGGTGGGTACTAGGTGTGGGGTCCATTCCACGGGTTCCGTGCCGTAGCTAACGCTTTAAGTACCCCGCCTGGGGAGTACGGCCGCAAGGCTAAAACTCAAAGGAATTGACGGGGCCCCGCACAAGCGGCGGAGCATGCGGATTAATTCGATGCAACGCGTAGAACCTTACCTGGGTTTGACATGGATCGGGAGTGCTCAGAGATGGGTGTGCCTCTTTTGGGGTCGGTTCACAGGTGGTGCATGGCTGTCGTCAGCTCGTGTCGTGAGATGTTGGGTTAAGTCCCGCAACGAGCGCAACCCTTGTTCACTGTTGCCAGCACGTTATGGTGGGGACTCAGTGGAGACCGCCGGGGTCAACTCG
C	root	II	/	Bacteria	Actinobacteria	Propionibacteriales	Kribbella	NA	ASV_200	no	GGTAGTCCACGCCGTAAACGTTGGGCGCTAGGTGTGGGGGACATTCCACGTCCTCCGTGCCGCAGCTAACGCATTAAGCGCCCCGCCTGGGGAGTACGGCCGCAAGGCTAAAACTCAAAGGAATTGACGGGGGCCCGCACAAGCGGCGGAGCATGCGGATTAATTCGATGCAACGCGAAGAACCTTACCTGGGTTTGACATATAGGGAAATCCTCCAGAGATGGGGGGTCCGTAAGGGTCCTATACAGGTGGTGCATGGCTGTCGTCAGCTCGTGTCGTGAGATGTTGGGTTAAGTCCCGCAACGAGCGCAACCCTCGTCCTATGTTGCCAGCACGTTATGGTGGGGACTCATAGGAGACTGCCGGGGTCAACTCG
C	root	I	high yield loss	Bacteria	Actinobacteria	Propionibacteriales	Nocardioides	NA	ASV_426	no	GGTAGTCCACACCGTAAACGTTGGGCGCTAGGTGTGGGGCCTATTCCATGGGTTCCGTGCCGTAGCTAACGCATTAAGCGCCCCGCCTGGGGAGTACGGCCGCAAGGCTAAAACTCAAAGGAATTGACGGGGGCCCGCACAAGCGGCGGAGCATGCGGATTAATTCGATGCAACGCGAAGAACCTTACCTGGGTTTGACATGCACTGGAAGCATCCAGAGATGGGTGTGCCCTTGTGGCCGGTGCACAGGTGGTGCATGGCTGTCGTCAGCTCGTGTCGTGAGATGTTGGGTTAAGTCCCGCAACGAGCGCAACCCTCGTTCCATGTTGCCAGCACGCCCTTCGGGGTGGTGGGGACTCATGGGAGACTGCCGGGGTCAACTCG
C	root	IV	/	Bacteria	Actinobacteria	Pseudonocardiales	Lechevalieria	NA	ASV_183	no	GGTAGTCCACGCCGTAAACGGTGGGTGCTAGGTGTGGGGGGCTTCCACGCCCTCTGTGCCGCAGCTAACGCATTAAGCACCCCGCCTGGGGAGTACGGCCGCAAGGCTAAAACTCAAAGGAATTGACGGGGGCCCGCACAAGCGGCGGAGCATGTGGATTAATTCGATGCAACGCGAAGAACCTTACCTGGGCTTGACATGGACTAGAAAGCTCTAGAGATAGAGCCTCCCTTGTGGCTGGTTCACAGGTGGTGCATGGCTGTCGTCAGCTCGTGTCGTGAGATGTTGGGTTAAGTCCCGCAACGAGCGCAACCCTCGTTCCATGTTGCCAGCACGTAATGGTGGGGACTCATGGGAGACTGCCGGGGTCAACTCG
C	root	III	/	Bacteria	Actinobacteria	Streptomycetales	Streptomyces	NA	ASV_119	no	GGTAGTCCACGCCGTAAACGGTGGGAACTAGGTGTTGGCGACATTCCACGTCGTCGGTGCCGCAGCTAACGCATTAAGTTCCCCGCCTGGGGAGTACGGCCGCAAGGCTAAAACTCAAAGGAATTGACGGGGGCCCGCACAAGCAGCGGAGCATGTGGCTTAATTCGACGCAACGCGAAGAACCTTACCAAGGCTTGACATACGCCGGAAAGCATCAGAGATGGTGCCCCCCTTGTGGTCGGTGTACAGGTGGTGCATGGCTGTCGTCAGCTCGTGTCGTGAGATGTTGGGTTAAGTCCCGCAACGAGCGCAACCCTTGTCCTGTGTTGCCAGCAACTCCTTCGGGAGGTTGGGGACTCACAGGAGACCGCCGGGGTCAACTCG
C	root	I	high yield loss	Bacteria	Actinobacteria	Streptomycetales	Streptomyces	NA	ASV_168	no	GGTAGTCCACGCCGTAAACGGTGGGAACTAGGTGTTGGCGACATTCCACGTCGTCGGTGCCGCAGCTAACGCATTAAGTTCCCCGCCTGGGGAGTACGGCCGCAAGGCTAAAACTCAAAGGAATTGACGGGGGCCCGCACAAGCAGCGGAGCATGTGGCTTAATTCGACGCAACGCGAAGAACCTTACCAAGGCTTGACATACACCGGAAACGTCTGGAGACAGGCGCCCCCTTGTGGTCGGTGTACAGGTGGTGCATGGCTGTCGTCAGCTCGTGTCGTGAGATGTTGGGTTAAGTCCCGCAACGAGCGCAACCCTTGTTCTGTGTTGCCAGCATGCCCTTCGGGGTGATGGGGACTCACAGGAGACTGCCGGGGTCAACTCG
C	root	I	high yield loss	Bacteria	Actinobacteria	Streptomycetales	Streptomyces	NA	ASV_230	no	GGTAGTCCACGCCGTAAACGTTGGGAACTAGGTGTTGGCGACATTCCACGTCGTCGGTGCCGCAGCTAACGCATTAAGTTCCCCGCCTGGGGAGTACGGCCGCAAGGCTAAAACTCAAAGGAATTGACGGGGGCCCGCACAAGCAGCGGAGCATGTGGCTTAATTCGACGCAACGCGAAGAACCTTACCAAGGCTTGACATATACCGGAAAGCATCAGAGATGGTGCCCCCCTTGTGGTCGGTATACAGGTGGTGCATGGCTGTCGTCAGCTCGTGTCGTGAGATGTTGGGTTAAGTCCCGCAACGAGCGCAACCCTTGTTCTGTGTTGCCAGCATGCCCTTCGGGGTGATGGGGACTCACAGGAGACTGCCGGGGTCAACTCG
C	root	V	/	Bacteria	Actinobacteria	Streptomycetales	Streptomyces	NA	ASV_62	no	GGTAGTCCACGCCGTAAACGGTGGGAACTAGGTGTTGGCGACATTCCACGTCGTCGGTGCCGCAGCTAACGCATTAAGTTCCCCGCCTGGGGAGTACGGCCGCAAGGCTAAAACTCAAAGGAATTGACGGGGGCCCGCACAAGCAGCGGAGCATGTGGCTTAATTCGACGCAACGCGAAGAACCTTACCAAGGCTTGACATACACCGGAAACGGCCAGAGATGGTCGCCCCCTTGTGGTCGGTGTACAGGTGGTGCATGGCTGTCGTCAGCTCGTGTCGTGAGATGTTGGGTTAAGTCCCGCAACGAGCGCAACCCTTGTCCTGTGTTGCCAGCGTGCCCTTCGGGGTGACGGGGACTCACAGGAGACCGCCGGGGTCAACTCG
C	root	III	/	Bacteria	Actinobacteria	Streptosporangiales	Nonomuraea	Nonomuraea salmonea	ASV_90	no	GGTAGTCCACGCTGTAAACGTTGGGCGCTAGGTGTGGGGATCTTCCACGATCTCCGTGCCGGAGCTAACGCATTAAGCGCCCCGCCTGGGGAGTACGGCCGCAAGGCTAAAACTCAAAGGAATTGACGGGGGCCCGCACAAGCGGCGGAGCATGTTGCTTAATTCGACGCAACGCGAAGAACCTTACCAAGGTTTGACATCACCCGGAAACGTGCAGAGATGTGCGCCTCTTCGGACTGGGTGACAGGTGGTGCATGGCTGTCGTCAGCTCGTGTCGTGAGATGTTGGGTTAAGTCCCGCAACGAGCGCAACCCTTGTTCCATGTTGCCAGCAACCTCTTCGGAGGGTTGGGGACTCATGGGAGACTGCCGGGGTCAACTCG
C	root	IV	/	Bacteria	Bacteroidetes	Cytophagales	Dyadobacter	NA	ASV_47	no	GGTAGTCCATGCCGTAAACGATGAGGACTCGCTGTTGGTCTGTCAAGGATCAGCGGCTTAGGGAAACCGTTAAGTCCTCCACCTGGGGAGTACGCCGGCAACGGTGAAACTCAAAGGAATTGACGGGGGTCCGCACAAGCGGTGGAGCATGTGGTTTAATTCGATGATACGCGAGGAACCTTACCTGGGCTAAATCACAGGAGAATCATTCAGAAATGGGTGAGCCAGCAATGGCTGCTGTGAAGGTGCTGCATGGCTGTCGTCAGCTCGTGTCGTGAGATGTTGGGTTAAGTCCCGCAACGAGCGCAACCCCTATGGTTAGTTGCCAGCACGTAATGGTGGGGACTCTAATCAGACTGCCTGTGCAAACAGA
C	root	IV	/	Bacteria	Bacteroidetes	Cytophagales	Dyadobacter	NA	ASV_71	no	GGTAGTCCATGCTGTAAACGATGAGGACTCGCTGTTTGATGGCAACATTGAGCGGCTTAGGGAAACCGTTAAGTCCTCCACCTGGGGAGTACGCCGGCAACGGTGAAACTCAAAGGAATTGACGGGGGTCCGCACAAGCGGTGGAGCATGTGGTTTAATTCGATGATACGCGAGGAACCTTACCTGGGCTAAATCAGACAGGAATTATGCAGAAATGTGTAAGCCAGCAATGGCCTGTTTGAAGGTGCTGCATGGCTGTCGTCAGCTCGTGTCGTGAGATGTTGGGTTAAGTCCCGCAACGAGCGCAACCCCTATGGTTAGTTGCCAGCACGTAATGGTGGGGACTCTAGCCAGACTGCCTGTGCAAACAGA
C	root	I	high yield loss	Bacteria	Firmicutes	Bacillales	Bacillus	NA	ASV_1293	no	GGTAGTCCACGCCGTAAACGATGAGTGCTAAGTGTTAGAGGGTTTCCGCCCTTTAGTGCTGCAGCTAACGCATTAAGCACTCCGCCTGGGGAGTACGGCCGCAAGGCTGAAACTCAAAGGAATTGACGGGGGCCCGCACAAGCGGTGGAGCATGTGGTTTAATTCGAAGCAACGCGAAGAACCTTACCAGGTCTTGACATCCTCTGACACTCCTAGAGATAGGAATTTCCCCTTCGGGGGACAGAGTGACAGGTGGTGCATGGTTGTCGTCAGCTCGTGTCGTGAGATGTTGGGTTAAGTCCCGCAACGAGCGCAACCCTTGATCTTAGTTGCCAGCATTCAGTTGGGCACTCTAAGGTGACTGCCGGTGACAAACCG
C	root	V	small yield loss	Bacteria	Firmicutes	Bacillales	Bacillus	NA	ASV_162	no	GGTAGTCCACGCCGTAAACGATGAGTGCTAAGTGTTAGAGGGTTTCCGCCCTTTAGTGCTGAAGTTAACGCATTAAGCACTCCGCCTGGGGAGTACGGCCGCAAGGCTGAAACTCAAAGGAATTGACGGGGGCCCGCACAAGCGGTGGAGCATGTGGTTTAATTCGAAGCAACGCGAAGAACCTTACCAGGTCTTGACATCCTCTGAAAACTCTAGAGATAGAGCTTCTCCTTCGGGAGCAGAGTGACAGGTGGTGCATGGTTGTCGTCAGCTCGTGTCGTGAGATGTTGGGTTAAGTCCCGCAACGAGCGCAACCCTTGATCTTAGTTGCCATCATTAAGTTGGGCACTCTAAGGTGACTGCCGGTGACAAACCG
C	root	IV	/	Bacteria	Firmicutes	Bacillales	Paenibacillus	NA	ASV_432	no	GGTAGTCCACGCCGTAAACGATGAGTGCTAGGTGTCGGGGATTCGATTTCTCGGTGCCGAAGTTAACACAGTAAGCACTCCGCCTGGGGAGTACGCTCGCAAGAGTGAAACTCAAAGGAATTGACGGGGACCCGCACAAGCAGTGGAGTATGTGGTTTAATTCGAAGCAACGCGAAGAACCTTACCAGGTCTTGACATCCCCATGAAACGCCTAGAGATAGGCGCCCTCTTCGGAGCATGGGAGACAGGTGGTGCATGGTTGTCGTCAGCTCGTGTCGTGAGATGTTGGGTTAAGTCCCGCAACGAGCGCAACCCTTGGATTTAGTTGCCAGCAGGTGAAGCTGGGCACTCTAGATCGACTGCCGGTGACAAACCG
C	root	V	/	Bacteria	Firmicutes	Bacillales	Bacillus	NA	ASV_461	no	GGTAGTCCACGCCGTAAACGATGAGTGCTAAGTGTTAGAGGGTTTCCGCCCTTTAGTGCTGCAGCAAACGCATTAAGCACTCCGCCTGGGGAGTACGGCCGCAAGGCTGAAACTCAAAGGAATTGACGGGGACCCGCACAAGCGGTGGAGCATGTGGTTTAATTCGAAGCAACGCGAAGAACCTTACCAGGTCTTGACATCTCCTGACAATCCTAGAGATAGGACGTTCCCCTTCGGGGGACAGGATGACAGGTGGTGCATGGTTGTCGTCAGCTCGTGTCGTGAGATGTTGGGTTAAGTCCCGCAACGAGCGCAACCCTTGATCTTAGTTGCCAGCATTTAGTTGGGCACTCTAAGGTGACTGCCGGTGACAAACCG
C	root	I	/	Bacteria	Firmicutes	Bacillales	Bacillus	NA	ASV_675	no	GGTAGTCCACGCCGTAAACGATGAGTGCTAAGTGTTAGAGGGTTTCCGCCCTTTAGTGCTGCAGCAAACGCATTAAGCACTCCGCCTGGGGAGTACGGCCGCAAGGCTGAAACTCAAAGGAATTGACGGGGACCCGCACAAGCGGTGGAGCATGTGGTTTAATTCGAAGCAACGCGAAGAACCTTACCAGGTCTTGACATCCTCTGACACTCCTAGAGATAGGACGTTCCCCTTCGGGGGACAGAGTGACAGGTGGTGCATGGTTGTCGTCAGCTCGTGTCGTGAGATGTTGGGTTAAGTCCCGCAACGAGCGCAACCCTTGATCTTAGTTGCCAGCATTCAGTTGGGCACTCTAAGGTGACTGCCGGTGACAAACCG
C	root	V	/	Bacteria	Firmicutes	Bacillales	Bacillus	Bacillus drentensis	ASV_692	no	GGTAGTCCACGCCGTAAACGATGAGTGCTAAGTGTTAGGGGGTTTCCGCCCCTTAGTGCTGCAGCTAACGCATTAAGCACTCCGCCTGGGGAGTACGGCCGCAAGGCTGAAACTCAAAGGAATTGACGGGGGCCCGCACAAGCGGTGGAGCATGTGGTTTAATTCGAAGCAACGCGAAGAACCTTACCAGGTCTTGACATCCTCTGACACTCCTAGAGATAGGACGTTCCCCTTCGGGGGACAGAGTGACAGGTGGTGCATGGTTGTCGTCAGCTCGTGTCGTGAGATGTTGGGTTAAGTCCCGCAACGAGCGCAACCCTTGATCTTAGTTGCCAGCATTTAGTTGGGCACTCTAAGGTGACTGCCGGTGACAAACCG
C	root	I	high yield loss	Bacteria	Firmicutes	Clostridiales	NA	NA	ASV_2539	no	GGTAGTCCACGCCGTAAACGATGAATACTAGGTGTCGGGGCCCTTCCGGGCTTCGGTGCCGACGCTAACGCATTAAGTATTCCACCTGGGGAGTACGTTCGCAAGAATGAAACTCAAAGGAATTGACGGGGACCCGCACAAGCGGTGGAGCATGTGGTTTAATTCGAAGCAACGCGAAGAACCTTACCAGGTCTTGACATCCCATTGACCGGTCCGTAACGGGACCTTCCCTTCGGGGCAATGGAGACAGGTGGTGCATGGTTGTCGTCAGCTCGTGTCGTGAGATGTTGGGTTAAGTCCCGCAACGAGCGCAACCCCTATCCTTAGTAGCCAGCAGTTCGGCTGGGCACTCTAGGGAGACTGCCAGGGATAACCTG
C	root	V	/	Bacteria	Firmicutes	Limnochordales	NA	NA	ASV_1112	no	GGTAGTCCCAGCCGTAAACGATGAGTGCTAGGTGTTGCGGGTATCGACCCCTGCAGTGCCGTAGTTAACGCAATAAGCACTCCGCCTGGGGAGTACGGCCGCAAGGCTGAAACTCAAAGGAATTGACGGGGGCCCGCACAAGCGGTGGAGCATGTGGTTTAATTCGATGCAACGCGAAGAACCTTACCAGGGCTTGACATCCCGCGAACCCTGTGGAAACACGGGGGTGCCCTTCGGGGAGCGCGGAGACAGGTGGTGCATGGTTGTCGTCAGCTCGTGTCGTGAGATGTTGGGTTAAGTCCCGCAACGAGCGCAACCCCTGCCCTGTGTTGCCAGCACTTCGGGTGGGCACTCACAGGGGACTGCCGGTGAAAAACCG
C	root	I	high yield loss	Bacteria	Firmicutes	Limnochordales	NA	NA	ASV_608	no	GGTAGTCCCAGCCGTAAACGATGAGTGCTAGGTGTTGCGGGTATCGACCCCTGCAGTGCCGTAGTTAACGCAATAAGCACTCCGCCTGGGGAGTACGGCCGCAAGGCTGAAACTCAAAGGAATTGACGGGGGCCCGCACAAGCGGTGGAGCATGTGGTTTAATTCGAAGCAACGCGAAGAACCTTACCAGGGCTTGACATCCCGCGAACCTCTGGGAAACCAGGGGGTGCCCCTTTGGGGAGCGCGGAGACAGGTGGTGCATGGTTGTCGTCAGCTCGTGTCGTGAGATGTTGGGTTAAGTCCCGCAACGAGCGCAACCCCTACGCTGTGTTGCCAGCACTTCGGGTGGGGACTCACAGCGGACTGCCGGTGAAAAACCG
C	root	IV	/	Bacteria	Proteobacteria	Betaproteobacteriales	NA	NA	ASV_3054	no	GGTAGTCCACGCCCTAAACGATGTCAACTGGTTGTTAGGGAAGTTTTTCCTTAGTAACGTAGCTTACGCGTGAAGTTGACCGCCTGGGGAGTACGGTCGCAAGACTAAAACTCAAAGGAATTGACGGGGACCCGCACAAGCGGTGGATGATGTGGATTAATTCGATGCAACGCGAAAAACCTTACCTACCCTTGACATGTATGGAACCTGGCTGAAAGGTCAGGGTGCTTGAAAGAGAGCCATAACACAGGTGCTGCATGGCTGTCGTCAGCTCGTGTCGTGAGATGTTGGGTTAAGTCCCGCAACGAGCGCAACCCTTGTCCTTAGTTGCTACGTTAAGGCACTTTAAGGAGACTGCCGGTGACAAGCCG
C	root	IV	/	Bacteria	Proteobacteria	Betaproteobacteriales	Methylotenera	Methylotenera versatilis	ASV_48	no	GGTAGTCCACGCCCTAAACGATGTCTACTAGTTGTTGGTGGAGTAAAATCCATGAGTAACGCAGCTAACGCGTGAAGTAGACCGCCTGGGGAGTACGGTCGCAAGATTAAAACTCAAATGAATTGACGGGGGCCCGCACAAGCGGTGGATTATGTGGATTAATTCGATGCAACGCGAAAAACCTTACCTGGCCTTGACATGTAACGAACTTTCCAGAGATGGATTGGTGCTCGAAAGAGAACGTTAACACAGGTGCTGCATGGCTGTCGTCAGCTCGTGTCGTGAGATGTTGGGTTAAGTCCCGCAACGAGCGCAACCCTTGCCATTAATTGCCATCATTTAGTTGGGCACTTTAATGGGACTGCCGGTGACAAACCG
C	root	IV	/	Bacteria	Proteobacteria	Myxococcales	Pajaroellobacter	NA	ASV_1354	no	GGTAGTCCACGCCGTAAACGATGGGTGCTAGGTGTCGCGGGCTTTGACTCCCGCGGTGCCGTAGCTAACGCATTAAGCACCCCGCCTGGGAAGTACGGCCGCAAGGCTAAAACTCAAAGGAATTGACGGGGGCCCGCACAAGCGGTGGAGCATGTGGTTTAATTCGACGCAACGCGAAGAACCTTACCTGGGCTAGAAAATGCAGGAACCTGGGAGAAGTCTCGGGGTGCTCTTCGGAGAGCCTGTAGTTAGGTGCTGCATGGCTGTCGTCAGCTCGTGTCGTGAGATGTTGGGTTAAGTCCCGCAACGAGCGCAACCCCTATCGCCAGTTACCAGCGAGTCATGTCGGGGACTCTGGCGAGACCGCCGATATTCAAATCG
C	root	I	/	Bacteria	Proteobacteria	Myxococcales	Aetherobacter	NA	ASV_509	no	GGTAGTCCACGCCGTAAACGATGGGTGCTAGGTGTTGCGGGCTTTGACCCCTGCAGTGCCGTAGCTAACGCATTAAGCACCCCGCCTGGGGAGTACGGCCGCAAGGCTAAAACTCAAAGGAATTGACGGGGGCCCGCACAAGCGGTGGAGCATGCGGTTCAATTCGACGCAACGCGCAGAACCTTACCTGGGCTAGAAAATGCAAGGACCTGGTCGAAAGATCGGGGTGCTCTTCGGAGAGCTTGTAGTTAGGTGCTGCATGGCTGTCGTCAGCTCGTGTCGTGAGATGTTGGGTTAAGTCCCGCAACGAGCGCAACCCCTGTCGTTAGTTGCCATCAGTTCGGCTGGGCACTCTAGCGAGACTGCCGATCTTTAAATCG
C	root	I	high yield loss	Bacteria	Proteobacteria	Rhizobiales	Devosia	NA	ASV_199	no	GGTAGTCCACGCCGTAAACTATGAGAGCTAGCCGTTGGAAGGTTTACCTTTCAGTGGCGCAGCTAACGCATTAAGCTCTCCGCCTGGGGAGTACGGTCGCAAGATTAAAACTCAAAGGAATTGACGGGGGCCCGCACAAGCGGTGGAGCATGTGGTTTAATTCGAAGCAACGCGAAGAACCTTACCAGCCCTTGACATGGTCAGACGATTTCCAGAGATGGATCTCTTCACTTCGGTGACTGATACACAGGTGCTGCATGGCTGTCGTCAGCTCGTGTCGTGAGATGTTGGGTTAAGTCCCGCAACGAGCGCAACCCTCGCCTTTAGTTGCCATCATTTAGTTGGGCACTCTAGAGGGACTGCCGGTGATAAGCCG
C	root	IV	/	Bacteria	Proteobacteria	Rhizobiales	Phyllobacterium	NA	ASV_421	yes	GGTAGTCCACGCCGTAAACTATGAGAGCTAGCCGTCGGGCAGTATACTGTTCGGTGGCGCAGCAAACGCATTAAGCTCTCCGCCTGGGGAGTACGGTCGCAAGATTAAAACTCAAAGGAATTGACGGGGGCCCGCACAAGCGGTGGAGCATGTGGTTTAATTCGAAGCAACGCGCAGAACCTTACCAGCCCTTGACATCCCGATCGCGGTTACCAGAGATGGTTTCCTTCAGTTAGGCTGGATCGGTGACAGGTGCTGCATGGCTGTCGTCAGCTCGTGTCGTGAGATGTTGGGTTAAGTCCCGCAACGAGCGCAACCCTCGCCCTTAGTTGCCATCATTCAGTTGGGCACTCTAAGGGGACTGCCGGTGATAAGCCGA	ATTGCAGAGTGCAATCCGAACTGAGATGGCTTTTGGAGATTAGCTCGACCTCGCGGTCTCGCTGCCCACTGTCACCACCATTGTAGCACGTGTGTAGCCCAGCCCGTAAGGGCCATGAGGACTTGACGTCATCCCCACCTTCCTCTCGGCTTATCACCGGCAGTCCCCTTAGAGTGCCCAACTGAATGATGGCAACTAAGGGCGAGGGTTGCGCTCGTTGCGGGACTTAACCCAACATCTCACGACACGAGCTGACGACAGCCATGCAGCACCTGTCACCGATCCAGCCTAACTGAAGGAAACCATCTCTGGTAACCGCGATCGGGATGTCAAGGGCTGGTAAGGTTCTGCGCGTTGCTTCGAATTAAACCACATGCTCCACCGCTTGTGCGGGCCCCC…	Phyllobacterium	152 S
C	root	IV	/	Bacteria	Proteobacteria	Rhizobiales	NA	NA	ASV_61	no	GGTAGTCCACGCCGTAAACGATGAATGTTAGCCGTCGGGCAGTTTACTGTTCGGTGGCGCAGCTAACGCATTAAACATTCCGCCTGGGGAGTACGGTCGCAAGATTAAAACTCAAAGGAATTGACGGGGGCCCGCACAAGCGGTGGAGCATGTGGTTTAATTCGAAGCAACGCGCAGAACCTTACCAGCTCTTGACATCCCGATCGCGGACAGTGGAGACATTGTCCTTCAGTTAGGCTGGATCGGTGACAGGTGCTGCATGGCTGTCGTCAGCTCGTGTCGTGAGATGTTGGGTTAAGTCCCGCAACGAGCGCAACCCTCGCCCTTAGTTGCCAGCATTCAGTTGGGCACTCTAAGGGGACTGCCGGTGATAAGCCGA
C	root	III	/	Bacteria	Proteobacteria	Rhizobiales	Mesorhizobium	Mesorhizobium loti	ASV_823	no	GGTAGTCCACGCCGTAAACGATGGAAGCTAGCCGTTGGCAAGTTTACTTGTCGGTGGCGCAGCTAACGCATTAAGCTTCCCGCCTGGGGAGTACGGTCGCAAGATTAAAACTCAAAGGAATTGACGGGGGCCCGCACAAGCGGTGGAGCATGTGGTTTAATTCGAAGCAACGCGCAGAACCTTACCAGCCCTTGACATCCCGGTCGCGGTTTCCAGAGATGGATACCTTCAGTTCGGCTGGACCGGTGACAGGTGCTGCATGGCTGTCGTCAGCTCGTGTCGTGAGATGTTGGGTTAAGTCCCGCAACGAGCGCAACCCTCGCCCTTAGTTGCCAGCATTAAGTTGGGCACTCTAAGGGGACTGCCGGTGATAAGCCGA
C	root	I	high yield loss	Bacteria	Proteobacteria	Xanthomonadales	Stenotrophomonas	NA	ASV_266	no	GGTAGTCCACGCCCTAAACGATGCGAACTGGATGTTGGGTGCAATTTGGCACGCAGTATCGAAGCTAACGCGTTAAGTTCGCCGCCTGGGGAGTACGGTCGCAAGACTGAAACTCAAAGGAATTGACGGGGGCCCGCACAAGCGGTGGAGTATGTGGTTTAATTCGATGCAACGCGAAGAACCTTACCTGGTCTTGACATGTCGAGAACTTTCCAGAGATGGATTGGTGCCTTCGGGAACTCGAACACAGGTGCTGCATGGCTGTCGTCAGCTCGTGTCGTGAGATGTTGGGTTAAGTCCCGCAACGAGCGCAACCCTTGTCCTTAGTTGCCAGCACGTAATGGTGGGAACTCTAAGGAGACCGCCGGTGACAAACCG

## Sheet: Sup. Table 7-genes-stress
Supplemental Table 7 Distinct abundant genes and gen-fragments in stressed and non-stressed rhizometagenomes. Sequences were annotated with EGGNOG and fold changes were calulated with DESeq2. All genes with a false discovery rate (FDR) < 0.05 are listed.
gene-contig		mean sequence number			fold change (A/B)			statistics			EGGNOG-annotation						protein sequence
		A (stress)	B (no stress)		log2FC	log2 FC SE		p-value	FDR		best_tax_level	KEGG Orthology	text desc.	preferred gene name	protein name
bacteria_375153		15400.3	31855.3		-1.04861	0.233725		7.24071e-06	4.32679e-05		Acidobacteria		SMART regulatory protein, ArsR		hypothetical protein		MVQYFQNHFDASFGALSDATRRGVLEQLGRADASITALAERFHMTLTGMKKHVGVLEQAGLVTTEKVGRVRTCKLGLRGLEEEAAWIERYRQLWSARFDELDNVVEELTRKERVDGRKNRK
bacteria_275308		8673.7	17603.7		-1.02119	0.243527		2.74877e-05	0.000141937		Acidobacteria	ko:K02982	Binds the lower part of the 30S subunit head. Binds mRNA in the 70S ribosome, positioning it for translation	rpsC	30S ribosomal protein S3		MRVSGRLNGAEIAHSEWYLHGQLPLQTLRADIDYGFAEANTTYGKIGVKVWLYKGERLTPRTGREEEFGASGGGGRDHRDRDRDRGPRRPGGGGRPEARG
bacteria_348150		16849	31678.8		-0.910891	0.206473		1.02574e-05	5.91158e-05		Acidobacteria	ko:K02454,ko:K02504,ko:K02652	Type II secretion system (T2SS), protein E, N-terminal domain	pilB	hypothetical protein		MDVAGALLDGGHQHDVHQLDDGRLTTLFLEEISAESLEKQGGEAPVIRMVNLLLMSSIQKGASDIHIEPYEREFRVRFRIDGILYSVMQPPMKFKDAITSRIKIMAKLDIAEKRLPQDGRIKLRFSDNGQSKEIDFRVSVLPTLFGEKIVMRLLDKEKLMLDMTRLGFEPE
bacteria_154547		31467.5	58145.5		-0.885812	0.207667		1.99422e-05	0.000106911		Acidobacteria	ko:K00384,ko:K03407,ko:K12257	HAMP (Histidine kinases, Adenylyl cyclases, Methyl binding proteins, Phosphatases) domain	MA20_07280	hypothetical protein		MAGNLTAQVRNIAEVTTAVANGDLSRKITVDVRGEILELKNTINTMVDQLNAFASEVTRVAREVGTEGELGGQAQVKGVGGVAGGARGGHRGQARRPGAGARRRRHLEGPDRQRQLDGQQPHGPGAQHRRRDDGGGARRPLAQDHRGGEGRDPGAEEHHQHHGGPVERLRLGRDAGGARGGHRRQAGRPGQGRGRRRHLEGPHQQRERAGRQPDRPGPQHRRGDHRGGARRPVAQDHGGGEGRDPGAEEHDQHHGRPAQRLRLGSDPGGEGSGHGRQAGRPGSACA
bacteria_247224		36633	66913.9		-0.869181	0.206805		2.63514e-05	0.00013699		Acidobacteria	ko:K03043,ko:K13797	DNA-dependent RNA polymerase catalyzes the transcription of DNA into RNA using the four ribonucleoside triphosphates as substrates	rpoB	DNA-directed RNA polymerase subunit beta		MEPDLRMVEERTERQVEVIKQLFEEKKEKIRRGDELPPGVIKLVKVYVAMKRKLSVGDKMAGRHGNKGVIARILPEEDMPYLPDGTPVEIVLNPLGVPSRMNVGQILETHLGWAAHALGLYFATPVFDGAREDEIKNWLEQAGLPKSGKTMLYDGMTGQSFEQNVTVGYIYMLKLSHLVDDKIHARSIGPYSLITQQPLGGKAQFGGQRFGEMEVWALEAYGAAHILQELLTAKSDDVTGRAKIYEAIVKGDASFTPGLPESFNVLIRELQSLCLDVELISTKKKPMEPLPVNDGEPVLEQV
bacteria_114934		68456	124534		-0.863303	0.202119		1.94366e-05	0.000104456		Acidobacteria	ko:K03544	ATP-dependent specificity component of the Clp protease. It directs the protease to specific substrates. Can perform chaperone functions in the absence of ClpP	clpX	ATP-dependent Clp protease ATP-binding subunit ClpX		MIQVQYYVLDVFADVAGLGERGGVHNRERHRQELGERLREQRLAGAGRADQQDVALGQLDVVPAARLLLDLDPLVMVVNRDGELLLGPFLTDDVLVEELLDFLGGRQGRPGAAVLEPVVVRDDVVTDLDEYVIGQERTKKKLAVAVYNHYKRIEIQKQPRSRNDIELTKSNILLIGPTGTGKTLLAQTLAKLLSVPFTIVDATTLTEAGYVGEDVENIILKLLQAAGGDIEKAQQGIIYIDEVDKICRKDENPSITRDVSGEGVQQALLKILEGTVANVPPQGGRKHPHQEFFQVDTTNILFICGGAFVGMDKQISRRTGGCSRA
bacteria_333650		62097.4	112597		-0.858575	0.181322		2.18957e-06	1.49381e-05		Acidobacteria	ko:K00384,ko:K03407,ko:K12257	HAMP (Histidine kinases, Adenylyl cyclases, Methyl binding proteins, Phosphatases) domain	MA20_07280	hypothetical protein		MGTEGKLGGQADVKGVAGTWKDLTDNVNFMAGNLTSQVRNIAAVTTAVANGDLSKKITVDVRGEILELKDTINTMVDQLSSFASEVTRVAREVGTEGELGGQAEVKGVAGTWKDLTDSVNSMAGNLTAQVRNIAEVTTAVANGDLSKKITVDVRGEILELKDTINTMVDQLNAFAGEVTRVAREVGTEGKLGGQADVKGVAGTWKDLTDSVNSMAGNLTGQVRNIAEDLALHVHRDLGREVALGDRRRHLGDVAHLRGEVRRHGVHGVGQVLPRAGDTLHVRLAAEASFRSHLARHPRHLRGEASQLVHHRVDGVLQLEDLALHVHLNLL
bacteria_28646		45065.1	69763.6		-0.630482	0.180852		0.000489964	0.00178325		Acidobacteria	ko:K02112	Produces ATP from ADP in the presence of a proton gradient across the membrane. The catalytic sites are hosted primarily by the beta subunits	atpD	ATP synthase subunit beta		MPVGTATLGRVMNVLGEPVDFPDRPIQSAERWSIHRAAPSLEDQSTELQMFETGIKVVDLLEPYLRGGKIGLFGGAGVGKTVIIQELIHNVAMKHGGVSVFAGVGERTREGNDLWLEFQESGVINMEDLGKSRAALVYGQMTEPPGARLRVALSGLTVAEYFRDAENKDVLLFIDNIFRFTQAGSEVSALLGRMPSAVGYQPTLLTEMGELQERITSTKKGSITSVQAIYVPADDYTDPAPATTFAHLDATTNLSRAIVELGIYPAVDPLASTSRILDARIIGDEHYNVARAVKQVLQRYKDLQDIIAILGIDELSEDDKLSVARARKIQRFLSQPFFVAEQFTGFPGKYVPIADTVRSFREIVDGKYDHLPEQAFYMVGTIEEAVEKAAKMKE
bacteria_222604		54485.3	123934		-1.18565	0.216688		4.45785e-08	4.5611e-07		Acidobacteriia	ko:K15987	Proton pump that utilizes the energy of pyrophosphate hydrolysis as the driving force for proton movement across the membrane. Generates a proton motive force	hppA	K(+)-stimulated pyrophosphate-energized proton pump		MIPELGDGSLWWKLSTVITCGTLAGAIIPEFVKVFTSTSSAHVREVVTSAREGGASLGILSGLVAGNFSAYWLGLTMVLLMGIGYGVSTLGLGALMAAPAVFAFGLVAFGFLGMGPVTIAVDSYGPVTDNAQSVFELSVIETLPGIKGQLKKEYGFDVNFEAAKHLLEENDGAGNTFKATAKPVLIGTAVVGATTMIFSIIVLLTAGLTQNLDKLSLLHAPFLLGLISGGAVIYWFTGASTQAVTTGAYRAVEFIKANIRLEGATKASIADSKRVVEICTQYAQKGMFNIFLAVFFVTLAFAFAEPYFFVGYLISIALFGLYQAIFMANAGGAWDNAKKVVEVDLKEKGTPLHAATVVGDTVGDPFKDTSSVAMNPIIKFTTLFGLLAVELAVSLTAER…
bacteria_144531		34818.4	68807.7		-0.98274	0.197324		6.34704e-07	4.92328e-06		Acidobacteriia	ko:K03086	Sigma factors are initiation factors that promote the attachment of RNA polymerase to specific initiation sites and are then released. This sigma factor is the primary sigma factor during exponential growth	rpoD	RNA polymerase sigma factor RpoD		MSIAKKYTNRGLQFLDLIQEGNIGLMKAVDKFEYRRGYKFSTYATWWIRQAITRAIADQARTIRIPVHMIETINKLIRTSRALVQELGREPTSEEIAKRMDIPVAKVRKVLKIAQEPISLETPIGEEEDSHLGDFIEDRNIVSPAEAVINLNLKEQTESVLKTLTPREEKVIKMRFGVGDGSEHTLEEVGQNFAVTRERIRQIEAKALRKLRHPSRSRKLKAFLEGRT
bacteria_280870		14510.1	27046.9		-0.898449	0.239583		0.000176796	0.000735747		Acidobacteriia	ko:K04488	A scaffold on which IscS assembles Fe-S clusters. It is likely that Fe-S cluster coordination is flexible as the role of this complex is to build and then hand off Fe-S clusters	iscU	Iron-sulfur cluster assembly scaffold protein IscU		MAYSDKVIDHYENPRNVGSLPKNDVNVGTGLVGAPECGDVMKLQVKVNPDTGVIDDAKFKTFGCGSAIASSSLATEWLKGKTVDQALAIKNTDIVAELSLPPVKIHCSVLAEDAIKAAIGDYKKKQAAEGKLTAVSSQQSV
bacteria_165222		14130.1	26148		-0.887966	0.222365		6.51661e-05	0.00030511		Acidobacteriia	ko:K00240	2Fe-2S iron-sulfur cluster binding domain	sdhB1	hypothetical protein		MAQSDVDRVQEFRKCIECFLCQDVCHVLREHQQHSEFIGPRFLIYVAALEMHPLDTGDRIEELRQAHGIGYCNITKCCTKVCPEHITITDNAIIPLKERVVDRFYDPLGRVLKLFSRREQP
bacteria_313359		46442.5	81489.9		-0.811186	0.177377		4.80269e-06	3.01469e-05		Acidobacteriia	ko:K03553	Can catalyze the hydrolysis of ATP in the presence of single-stranded DNA, the ATP-dependent uptake of single-stranded DNA by duplex DNA, and the ATP-dependent hybridization of homologous single-stranded DNAs. It interacts with LexA causing its activation and leading to its autocatalytic cleavage	recA	Protein RecA		MAVGQIEKQFGKGAIMRLGQKGGIAPVESISTGSISIDYALGIGGVPRGRVVEIFGPESSGKTTLALQVIAEAQKAGGMAAFVDAEHALDAAYAQKLGVELDNLLVSQPDNGEQALEIVEVLVRSGAVDVVVVDSVAALVPRAEIEGEMGEAQMGLQARLMSQALRKLTGVVSKSKTTLIFINQLREKIGVMFGNPETTTGGRALKFYASVRIDIRRIASIKDGDVVIGGRTRVKVVKNKVAPPFREAEFDVMYGEGISRTGDLLDLAVDKRIIEKSGAWFAYGGERLGQGRENAKQFLKDNPVVCKAIEDRVRRELGMTHEPAESATA
bacteria_100773		47485.6	80107.5		-0.754461	0.206062		0.000250906	0.00100419		Acidobacteriia	ko:K07713,ko:K07714,ko:K19641	response regulator, receiver	nla19	Regulatory protein AtoC		MRDGAFHYIPKPFQNQEVLLTVRKGAEARRLTEENRRLKEELSKRYGLGRIVGKSDTMRKVFDLVRLAGPSKSTILVEGESGTGKELVARAIHTHSPRSGAPFVTVNSGSMPADLLESNLFGHVRGSFTGAVANKKGLFEVAEGGSIFLDEIGTVGLETQAKLLRVIQEKEFMRLGSVDTQKADVRIIAATNVDLKKMVGEGRFREDLYYRLCVITIPIPPLRERREDIPLLADHFVRLYASENNKPISGLEPEAMKALLDYDWPGNVRELENAIERAVVLCSAGSIGLDLLPETVLQPGRGEVLIRLPENGSTYRDLIEEYERRLIRTALRRTNGVQKRAAELLKLKPTTLHEIIKRLEIRDQ
bacteria_122080		17299.2	25883.3		-0.581347	0.195406		0.00292924	0.00798637		Acidobacteriia	ko:K02950	Interacts with and stabilizes bases of the 16S rRNA that are involved in tRNA selection in the A site and with the mRNA backbone. Located at the interface of the 30S and 50S subunits, it traverses the body of the 30S subunit contacting proteins on the other side and probably holding the rRNA structure together. The combined cluster of proteins S8, S12 and S17 appears to hold together the shoulder…	rpsL	30S ribosomal protein S12		MPTFHQLVKQGRTPTRYKTASPALQGSPQRRGVCTRVYTQTPKKPNSALRKVARVRLTNGIEVTTYIPGIGHNLQEHSIVLIRGGRVKDLPGVRYHVVRGTLDAVGVANRKQSRSKYGAKRPKAAAK
bacteria_170672		26814.2	38498.8		-0.521839	0.192477		0.00670435	0.0155733		Acidobacteriia	ko:K03086	Sigma factors are initiation factors that promote the attachment of RNA polymerase to specific initiation sites and are then released. This sigma factor is the primary sigma factor during exponential growth	rpoD	RNA polymerase sigma factor RpoD		MQLGDLIQEGVIGLNRAVEKFDWRRGFKFSTYATWWIRQAITRAIADQARTIRIPVHMIETINKLIRTSRALVQELGREPTSEEIAKRMDIPVAKVRKVLKIAQEPISLETPIGEEEDSHLGDFIEDRNIVSPAEAVINLNLKEQTEAVLKTLTPREEKVIKMRFGVGDGSEHTLEEVGQNFAVTRERIRQIEAKALRKLRHPSRSRKLKAFLEGRT
bacteria_335813		40305.6	55751.2		-0.468027	0.16133		0.00371907	0.00971555		Acidobacteriia	ko:K03046,ko:K13797	DNA-dependent RNA polymerase catalyzes the transcription of DNA into RNA using the four ribonucleoside triphosphates as substrates	rpoC	DNA-directed RNA polymerase subunit beta'		MQLNRAALDEHGLEGLDAQPVQGRRTVQQHGVIVDDLLEHVPDLVAHTLDVALGALDVVRVAMIHQLAHHERLEQLQRHLLGQATLIQLQIWPDHDHRATRVVNTLAEQVLAEAPLLALQHVGERLQGPVAGPGHRPTAAAVVEQRVDGLLQHPLLVVDDDLGRPEVEQPLEPVVAVDHPPVEVVEVRGREAPAVELDHRAQLRWDHRDAVEHHPLRPVGRVEERGGDLEPLHRPGLLLALRGVDHLLELKAPEIIVRNEKRMLQEAVDALFDNGRRGRVLRGANNRPLKSLSDTLKGKQGRFRQNLLGKRVDYSGRSVIVDGSVMMPSWQQS
bacteria_234792		5920.35	15143		-1.3549	0.321988		2.57742e-05	0.000134226		Actinobacteria				hypothetical protein		MTLIVFLSSRISPFTSTVIFLDKSPRATAVVTSAMLRTWPVRLAAIKFTLSVRSFHVPPTPGTCAWPPSLPSVPTSRATRVTSDAKPLS
bacteria_07225		27498	69731.4		-1.34251	0.195186		6.06537e-12	1.672e-10		Actinobacteria				hypothetical protein		MIFLDRSPAATALVTSAMFRTCEVRLPAMKFTDSVRSFQVPATPCTSAWPPSLPSVPTSRATRVTSAAKDRNWSTMVLMVFFSSEISPFTSTVIFLDKSPAATAVVTSAMLRTCEVRLPAMKFTDSVKSFQVPATPCTSAWPPSLPSVPTSRATRVTSAAKDRSWSTIVFTVFFSSRISPFTSTVIFLDKSPAATALVTSAMLRTWDVRLPAIEFTESVKSFQVPDTPSTRAWPPNDPSVPTSRATRVTSDAKDRSWSTMVLMVFLSVRNSPFTSTSIFLDKSPLATAVVTSAMLRTCAVRLPAIEFTESVRSFQVPARPARRPGHRACPRYPLRAPPGSLPRRTTRAGPPSC
bacteria_13273		6328.52	15466.5		-1.28921	0.228763		1.74461e-08	1.98119e-07		Actinobacteria				hypothetical protein		MVLMVFLSSRISPFTSTVIFFDRSPFATAVVTAAMLRTWPVRFDAMKLTLSVKSFQVPPTPGT
bacteria_50146		43512.2	102157		-1.2313	0.169943		4.31221e-13	1.67834e-11		Actinobacteria				hypothetical protein		MSVRSFHVPATPLTIACPPSLPSVPTSRATRLTSPANELSWSTIVLMVFLSSRISPRTSTVIFLERSPLATAVVTSAMLRTWPVRLVAIALTESVRSFQVPATPGTSACPPSLPSVPTSRATRVTSEAKPLSWSTIVFRVFLSVRISPFTSTVIFDDRSPLAIAVATSAMLRTCPVRFEAMKLTLSVRSFQVPATPGTCAWPPSLPSVPTSRATRLTSEAKPFSWSTIVLSVFFSSRISPLTSTVIFFERSPLATAVATAAMLRT
bacteria_187110		20504.9	47421.7		-1.20959	0.16493		2.23476e-13	9.49142e-12		Actinobacteria				hypothetical protein		MGDTDHGARKAQQELLQPFDRFGVEVVGRLVEQQHVGLAQQQPAQRDAALLAAREHADHGVPRCEAQRVGGDLELQVGVLAAAGGDDGFELGLLGGELVEIGVGLAVLGVDLVEPLLRGQRAADALLDRLAHGLVRVHHRLLRQVADLQVRHRRGFALDVLVDAGHDLEQRRFARAVQAEHADLGAGEEAERDVLEDLAFRRHDLADAVHGVDVLGHGVPVKRFL
bacteria_318719		33156.9	74372.6		-1.16548	0.183495		2.13158e-10	4.03554e-09		Actinobacteria				hypothetical protein		MILRDRSPFAIAVATSAILRTWPVRFDAIELTLSVRSFQVPATPGTAAWPPSLPSVPTSRATRVTSAAKPLSWSTIVLMVSFSSRISPFTSTVILRDRSPRATAVVTSAMLRTCEVRLLAIELTLSVRSFQVPPTSATAACPPSLPSVPTSRATRLTSEANAFSWSTIVLMVSFSSRISPRVSTVIFFERSPLATAIVTSAMLRTCEVRLLAIELTLSVRSFHVPPTPATAAWPPSLPSVPTSRATRLTSLANAFSWSTIVLMVFLSSRISPRTSTVIFFERSPRATAVVTSAMLRT
bacteria_206409		26485.9	55256.4		-1.06093	0.22207		1.77533e-06	1.23992e-05		Actinobacteria				hypothetical protein		MILRDRSPRATAVVTSAMFLTWAVRLPAMALTESVRSFQVPATPGTTAWPPSLPSVPTSRATRVTSAANERSWSTIVLMASLSWRISPRTSTVILRERSPRATAVVTSAMFLTCAVRLPAIALTESVRSFHVPATPGTIACPPSLPSVPTSRATRVTSEANERSWSTIVLMASLSWRISPRTSTVILRERSPLATAMVTSEMLRTCAVRLLAIELTDSVRSFHTPLTPGTWAWPPSLPSEPTSRATRVTSDVKTPSC
bacteria_349743		33798.2	69628.2		-1.04275	0.188773		3.31714e-08	3.49933e-07		Actinobacteria				hypothetical protein		MTTGASSERISRPTVFRSFCPCSIRLNLARLVFSQSCSVFFCVVSRRLRIISLVVSFSAATSPRASTVIERVRSPCVTAVATSAIARTCVVRLAASWLTFSVSPFQVPAAPGTLAWPPSLPSTPTSRATLVTWSAKVASVSVMLLMVSASAAISPLASTVSFCWRSPLATAVTTLAMPRTCPVRLHAMKLSFSVRSFQVPDTSRTWAWPPSRPSVPTSRATRVTSAAKEDSWSTMVLIVAFSSRISPFTSTVIFSDRSPAATALVTSSMLRTCEVRLPAIELTESVRSFQVPATPRGSLSMTLPTTCRSRR
bacteria_307201		17167.6	35341.9		-1.04173	0.221499		2.56242e-06	1.72225e-05		Actinobacteria				hypothetical protein		MILRDRSPRATAVVTSAMLRTWPVRFVAMAFTESVRSFHVPATPVTVAWPPSFPSVPTSRATRVTSAAKPFSWSTIVLMVSLSSRISPRTSTVILRDRSPFATAVVTSAMLRTWLVRLDAIEFTLSVSSFHTPDTPVTSA
bacteria_279111		46388.9	94492.5		-1.02644	0.140367		2.62179e-13	1.07737e-11		Actinobacteria	ko:K00287	bifunctional deaminase-reductase domain protein		hypothetical protein		MESYWPAVACGDVEAPQAMREWAVKLEAKPKYVASSTRTDFPWTNSHHIAGDLRAAVQKLKEATPTGVLLGSGKLAAELDRLDLIDEYKFLVHPRIAGHGPTLYESGLPSTRRLELISAKSLRNGAVAMHYRRAR
bacteria_228713		27511.8	55929.8		-1.02359	0.217528		2.5318e-06	1.70297e-05		Actinobacteria				hypothetical protein		MARTWVVRLAASWFTLAVRSRQMPAAPGTRACPPSFPSTPTSRATVVTWSANVPSVSIMLLIVSASSAISPLASTVSLRLRSPMATAVTTFAMPRTWFVRLPAMKFTLSVKSFHVPATPFTSACPPSLPSVPTSRATRVTSDAKLLSWSTIVLMVCFSSRISPFTGTVIFFDRSPFATAVVTAAMLRTWLVRLPAIEFTESVRSFQVPATPFTSAWPPSSPSVPTSLATRVTSEAKEESWSTIVLMTFLIWRISPRTSTVIFWVRSPSAMAVATLETSRSWTVRLPAMRFTESVRSFQTPATPLTSA
bacteria_228712		7067.96	13712.4		-0.956195	0.223159		1.82896e-05	9.91482e-05		Actinobacteria				hypothetical protein		MLTVFLSSRISPLTSTVIFLVRSPLATALVTSAMLRTWEVRLPAMRLTLSVRSFQVPATPFTSACPPSFPSVPTSRATRVTSAAKEES
bacteria_01665		23198.7	44506.7		-0.940001	0.197017		1.83166e-06	1.27373e-05		Actinobacteria				hypothetical protein		MPTSRATRVTSDANERSWSTIVLIVFLSSRISPFTSTVIFFDRSPVATAVVTSAMLRTCAVRLLAMKFTLSVRSFHVPATPCTSACPPSLPSVPTSRATRVTSDANELS
bacteria_115628		12193.6	23296.7		-0.934035	0.201435		3.53651e-06	2.29912e-05		Actinobacteria				hypothetical protein		MLVKRARLVFSQSCSVLRSVVSLRLSIIVLMLSLSSATSPRASTLIERVRSPLVTAVATSAMARTCVVKLAASWFTLSVRCFHVPAAPGTLAWPPSFPSTPTSRATVVT
bacteria_199768		39418.8	75289.4		-0.933579	0.217565		1.77838e-05	9.67487e-05		Actinobacteria				hypothetical protein		MARLVLSQSCSVFFRVVSFRLRIISLMLSLRAATSPCAPTVTKRVRSPLVTAVATSAIARTCVVRFAASWFTFSVKSFHVPAAPGTRAWPPSLPSTPTSRATVVTWSANVASVSIIELIVSASCAISPFASSVSLRRRSPLATAVTTRAMPRTWPVRFEAIEFTLSVRSSHTPDTPCTCAWPPSLPSVPTSRATRVTSAAKEESWSTMRLTVSFSSRISPFTSTVILRERSPLATAFVTSAMLRTCAVRFEAMKFTESVRSRHVPATPCTSAWPPRRPSVPTSRATRVTSAANERSWSTMRFTVSFSSRISPRTSTVIFFDRSPLATAVVTSAMLRTCAVRLPAIEFTESVRSRHVPETPSTRAWPPSLPSVPTSRATRVTSAAKERS
bacteria_68467		39547.6	75331.5		-0.929675	0.190708		1.08888e-06	7.99691e-06		Actinobacteria				hypothetical protein		MLLMVSASAATSPFDFTARFCLSSPLATAVTTLTMPRTCSVRLAAITFTVSVRSFQVPATPGTCAWPPSLPSVPTSRATRVTSEANALSWSTIVLMVFLSSRISPFTSTVILRDRSPRATAVVTSAMLRTWPVRLEAIELTLSVRSFQVPATPRTCACPPSLPSVPTSRATRVTSSAKEDS
bacteria_289204		13325.5	25164.5		-0.917238	0.237708		0.000114006	0.000497526		Actinobacteria				hypothetical protein		MVLMVAFSSRISPFTSTVIFLLRSPAATALVTSAMLRTCEVRFDAIEFTESVRSFQVPATPCTSAWPPSLPSVPTSRATRVTSAAKLRS
bacteria_326869		60309.4	112940		-0.905117	0.162501		2.54877e-08	2.75791e-07		Actinobacteria				hypothetical protein		MVTAVAASAMARTWPVRLVAIEFTLSVRSFQVPATPGTWAWPPSLPSVPTSRATRVTSDENEFNWSSMVLMVFFSSRISPRTSTVIFLERSPMATAVETSAMLRTWPVRFAAIRFTLSVRSFQAPVTPSTRAWPPSLPSVPTSRATRVTSEAKAFSWSTMVLMVFFSSRISPFTSTVIFLERSPLATAVVTSAMFRTWPVRLPAIRFTLSVRSFHVPATPGTCA
bacteria_288236		13964.7	26090.4		-0.90178	0.217969		3.51584e-05	0.000176761		Actinobacteria				hypothetical protein		MVLMVFFNSRISPRTSTVILRLRSPLATAVVTSAMLRTWPVRLLAIWFTESVRSFHTPPTPFTFAWPPSLPSLPTSRATRVTSAEKEFNWSTMVLMVFFNSRISPFTSTVILRLRSPFATAVVTSAMLRT
bacteria_177350		16257.6	29963.6		-0.882142	0.200626		1.09782e-05	6.28801e-05		Actinobacteria				hypothetical protein		MPATPRTCAWPPSLPSEPTSRATRVTSEAKDRSWSTIVLMSSLSCRISPRTSTVILRDRSPLATAVVTSAMLRTWPVRLPAMKFTLSVRSFQVPATPCTSAWPPSFPSVPTSRATRVTSAAKELS
bacteria_12254		29249.4	52916.3		-0.855318	0.160005		9.01288e-08	8.59458e-07		Actinobacteria				hypothetical protein		MFVNLARLVFSQSCSVLTCVVRRRLPIIVLMLSLSSATSPRASTWIERVKSPLVTAVATSAMARTCEVRLAASRLTLPVRSFQVPAAPGTLAWPPSRPSTPTSRATLVT
bacteria_354494		32735	59221.1		-0.8553	0.155242		3.59954e-08	3.75519e-07		Actinobacteria				hypothetical protein		MPTSRATRVTSEEKAFSWSTMMLMVFFSSRISPRTSTVIFFDKSPLATAVVTSAMLRTWPVRLPAMEFTLSVRSFQVPATPSTLAWPPSRPSVPTSRATRVTSPAKALSWSTIVLTVSLSCRISPDTLTVIFLERSPLAMAVATSAILSTWAVRLPAIELTLSVRSFQVPATPGTTACPPSLPSVPTSRATRVTSAANPRS
bacteria_108166		38045	68211.4		-0.842322	0.204494		3.80411e-05	0.00018983		Actinobacteria				hypothetical protein		MDQDDRILEHDFHALGVGDEVGREVAAVELHAFDHFERGVERPRLFNGDDAVLADLVHRFRDDLADRLVVVGRDGADLSDHVAAHVLLHLLQLAGDRLDRFLDPALDVHRVGAGDDVFRALAEDRLREHGGRGGAVTRDIRGLARNLAHHLGAHVLERILEVDFLRDGHAVLGDGGGAEFLVEDDVAAFRTERHLDGIGQLVHAAQHGLP
bacteria_98756		42416.7	76031		-0.841975	0.154923		5.4856e-08	5.49493e-07		Actinobacteria				hypothetical protein		MIFRDKSPRATEVATSAILRTCAVKLLAMLLTLSVRSFHVPPTPGTTACTPSLPSVPTSRATRVTSEAKELSWSTMVLMVFLSSRISPFTSTVIFLERSPDATAVVTSAMLRTWPVRFAAMAFTLSVKSFHVPPTPGTCACPPSLPSVPTSRATRVTSDANELSWSTMVLMVFLSSRISPFTSTVILRDRSPRATAVVTSAMLRTCVVRLAASRLTLSVRSFQVPPTPGTTAWPPSLPSVPTSRAIRVTSAANALS
bacteria_257273		69487.2	123287		-0.827215	0.157997		1.64417e-07	1.47175e-06		Actinobacteria				hypothetical protein		MTSEANARNWSTIVLMVSLSSRSSPFTSTVIVRDRSPLAIAVATSAMLRTWAVRLPAMKLTLSVRSFQVPATPGTCAWPPSLPSVPTSRATRVTSEANELSWSTIVLMVSLSSRISPRTSTVILRDRSPRATAVVTCAMLRTWSVRLPHMALTESVRSFQVPATPGTSAWPPSLPSVPTSRATRVTSDANERNWSTIVLMASFSCRISPRTSTVIFFDKSPSATAMVTSAMLRTCAVRLLAIEFTLSVRSFHTPVTSRTCA
bacteria_02077		19713.4	34810.3		-0.820389	0.157196		1.79979e-07	1.59011e-06		Actinobacteria				hypothetical protein		MLSVSFKSRISPRTSTVILRERSPLAIAVATSAMLRTCAVRLPAMELTLSVRSFQVPATPETCAWPPSLPSVPTSRATRVTSPAKALSWSTIVLMVFFSSRISPFTSTVILRDRSPRATAVVTSAILRTWPVRLEAMELTFSVRSFQVPATPGTCAWPPSLPSVPTSRATRVTSEAKRFS
bacteria_185715		41506.5	72985.5		-0.814283	0.18026		6.26409e-06	3.80628e-05		Actinobacteria				hypothetical protein		MILRERSPRATAVVTSAMLRTCAVRLAPITLTESVRSFQVPATPGTTACTPRRPSVPTSRATRVTSDANDRNCSTIALMASFNCRISPRTSTVILRDRSPLATAIVTSAMLRTWPVRLDAIELTLSVRSFQVPATPGTTAWPPSLPSVPTSRATRETSEANAFSWSTIVLMVFFSSRISPLTSTVIFLERSPRAIAVDTSAMLRTCPVRLLAIEFTLSVKSFHVPATPFTSAWPPRIPSVPTSRATRVTSEANDESWSTIVLIVFLSSRISPLTSTVIFFDRSPFATAFVTSAMLRTWPVRLPAMKFTLSVKSFHVPDTPSTRAWPPSLPSVPTSRATRVTSDANDRS
bacteria_135006		28298.2	49537.3		-0.807817	0.185051		1.26904e-05	7.15047e-05		Actinobacteria				hypothetical protein		MRLNLARLVFSQSCSVFFCVVSLRFLIISLIVSFRDATSPCVSTVIERVRSPCVTAVATSAIARTCVVRLAASSLTFSVRPFHVPAAPGTFAWPPSLPSTPTSRATVVTWSAKVASVSVMPLIVSASLATSPRADTVTFCDRSPLATAVVTCAIPRTWAVRLPAIRFTESVRSFHTPATPGTCA
bacteria_330754		20861.4	36354.3		-0.801316	0.196221		4.43174e-05	0.000218009		Actinobacteria				hypothetical protein		MIFFDRSPPAIAVATSAMLRTCAVRFEAMKLTLSVRSFQVPATSGTWAWPPSFPSVPTSRATRVTSEAKALSWSTIVLTVFFSSRISPLTSTVIFFDRSPFATAVVTSAMLRTWPVKLPAIELTLSVRSFQVPATPGTLA
bacteria_121017		34857.4	60364.8		-0.792265	0.154038		2.69925e-07	2.27773e-06		Actinobacteria				hypothetical protein		MIRLRHRVNAVSVEGLDHRAFTYVAEQREFATLLFWDVPVAAAQQNIRLDANRAQFLHRMLRRLGLQLARRGDVGHQGEVHELRALGAALGADLADRFEEGQRLDVADRAADFHQAHVETRGRIVDATLDLVGDVRDDLHGAAEVVAAALLADHVLVDPAGGDRMLARQAHADEALVVAEVEVGFGAVVGDVHLAVLERAHRARIDVDVGVELHHRHAQTARFEDGGQRGRGDALAERGHHAAGDEYERRPGNWRRHGKGGFRKAVVYR
bacteria_102983		40421.7	69526.5		-0.782439	0.157146		6.38937e-07	4.95393e-06		Actinobacteria				hypothetical protein		MLSFNAAISPEASTAIERVRSPLVTAVATSAIERTWLVRLVAIALTLSVRSRHRPAAPGTRAWPPRRPSTPTSRAMFVTWSPKVESVSIISLMVSASAAISPFASKVSLRLRLPCATAVTTPAMPRTWLVRLVAIRLTLSVKSFQVPPTPGTLACPPSLPSVPTSRATRVTSDAKPLSWSTMVLMVFLSARISPFTSTVIFFDKSPRATAVVTSAMLRTWPVRLSAIRLTLSVRSFHVPPTPRTCAWPPSLPSVPTSRATRVTSEANELSWSTMVLMVFLSSRISPFTSTVIFLDKSPEATAVVTSAMLRTWPVKFAAIALTLSVRSFHVPPTPSTCA
bacteria_46198		34321.2	58964.7		-0.78077	0.187565		3.14564e-05	0.000159999		Actinobacteria				hypothetical protein		MVLTVFLSSRISPLTSTVIFLERSPAATALVTSAMLRTCEVRFEAIELTDSVRSFQVPATPCTSACPPSLPSVPTSRATRVTSAANERSWSTMVLIVALSSRISPLTSTVIFFERSPAATALVTSAMLRTCDVRLPAIEFTESVRSFQVPETPFTSAWPPSIPSVPTSRATRVTSAANDESWSTIVLIVAFSSRISPLTSTVIFFDRSPAATALVTSAMLRTCEVRFDAIELTESVRSFQMPATPCTSACPPRRPSVPTSRATRVTSEANERS
bacteria_177965		27989.6	47874.5		-0.774388	0.188491		3.98484e-05	0.000198009		Actinobacteria				hypothetical protein		MLAIELTESVKSFHVPATPCTSAWPPRRPSVPTSRATRVTSDANDRSWSTIVLIVFLSSRISPFTSTVIFLERSPVATAVVTSAILRTCAVRLLAMKLTLSVRSFHVPATPCTSACPPSLPSVPTSRATRVTSAANERSWSTIVLIVFLSSRISPLTSTVIFFDRSPLATAFVTSAMLRT
bacteria_322861		4784.73	8172.64		-0.772412	0.197444		9.15133e-05	0.000412195		Actinobacteria				hypothetical protein		MPVLDPNPQNGQKKMLLVFGSFFAIFVVIAIIATIASP
bacteria_297316		27784.1	46857.4		-0.754029	0.187557		5.81319e-05	0.000276946		Actinobacteria				hypothetical protein		MLRTWPVRLAAIRLTLSVKSFHVPATPRTCAWPPSLPSVPTSRATRVTSDANEFNRSTIVLMVFFSSRISPFTSTVIFFDKSPSATAVVTSAMLRTWPVRFAAMALTLSVKSFHVPPTPGTWAWPPSLPSVPTSRATRVTSEAKPFN
bacteria_126019		57634.1	96689.2		-0.746442	0.185878		5.9253e-05	0.000281831		Actinobacteria	ko:K01858	Myo-inositol-1-phosphate synthase	ino1	hypothetical protein		MLYAWAAMMEGVAFMNGAPILCCDIPAIEHLARDRKVPIGGKDFKTGQTMLKTVLAPMFKARMLGVAGWYSTNILGNRDGEVLDDPESFKTKEESKLGVLEYILQPQVYPELYGNIFHKVRINYYPPRGDNKEGWDNIDIFGWLGYPMQIKVDFLCRDSILAAPLVLDLALFSESLHDAGLADAGRDLATPFLELPGHDLRRPLRSPRTTRDRERWAPRESNPDTGSSP
bacteria_143190		28843.7	48354.9		-0.745421	0.162994		4.80061e-06	3.01445e-05		Actinobacteria				hypothetical protein		MVTAVATSAIARTCEVRLAASRLTLPVRSFQVPAAPGTLAWPPRRPSTPTSRATLVTWSAKVASVSVMLLMVSASAATSPFDFTVRFCFRSPSATAVTTLTMPRTCSVRLAAMKFTVSVRSFQVPATPGTCA
bacteria_42966		68599.2	113286		-0.72372	0.145047		6.05172e-07	4.7149e-06		Actinobacteria				hypothetical protein		MHRIGGRHRERHQGVAALVVGRQLLLTVGHDHGAAFRAHHHLVLGVLEVAHGDHAAVLARGQQGGFVDQVREVGAGEPGGPARNDLHVHVGGQRHVLHVHADDPLAAVDVGVGHHDLTVEAAGTQQRRVQHVGTVGGGDQDDAFVGLEAVHLDQQLVEGLLALVVAAAQAGAAMATDGVDFVDEDDAGRVLLGLLEHVADAGSADADEHLDEVRTRNGEERNVGFARDRTRDQGLAGAGRADQQHAARNAAAEALEFAGVAQEFDDLLQVLLGFVDAGDVLEGDAAMGLGQHLRTRLAEAHRLAGAALHLPRQEDPHADQRDEGQPGDQQRDEPRHVVAGRLRGDRDLAVIEALHQRRIVRRIGLERGAVGEGAMDIRPLDHDVANAVLVNLAQQLGKR…
bacteria_143993		38857	63933.8		-0.718423	0.183506		9.04117e-05	0.000407545		Actinobacteria				hypothetical protein		MRLPAIELTLSVRSFQVPATPRTLAWPPSLPSVPTSRATRVTSPAKALSWSTMVLMVSFSSRISPRTSTVIFFDRSPLATAVVTSAMLRTCAVKLLAIELTLSVRSFQVPATPSTLAWPPSRPSVPTSRATRVTSPAKALSWSTIVLSVSFNCRISPDTLTVIFLERSPPAMAVATSAMLRT
bacteria_143994		14158.7	23081.3		-0.705099	0.189073		0.000192058	0.000794398		Actinobacteria				hypothetical protein		MPATPGTLAWPPSRPSVPTSRATRVTSPAKRLSWSTIVLSVSLSCRISPRTSTVILRDRSPPAIAVATSAMLLTCAVKLPAIEFTLSVRSFQVPATPVTWAWPPSLPSVPTSRATRVTSDAKALSWSTIVLSVSFN
bacteria_102982		54582.1	88708.7		-0.700665	0.117358		2.36802e-09	3.32614e-08		Actinobacteria				hypothetical protein		MVSLSSRISPFTSTVIFFDKSPRATAVVTSAMLRTWPVRLPAIALTLSVRSFHVPPTPSTCAWPPRRPSVPTSRATRVTSDANELSWSTMVLMVFLSSRISPRTSTVIFLERSPRATAVVTSAMLRTWPVRLSAIRFTLSVRSAQVPATPGTCAWPPSLPSVPTSRATRVTSLAKPLSWSTMVLMVFLSSRISPCTSTVIFFDKSPEATAVVTSAILRTWPVRFAAIEFTLSVRSFQVPPTPGTCAWPPSLPSVPTSRATRVTSDAKPLSWSTMTLMVFLSSRISPFTSTVIFVDKSPEATAVVTSAMLRTWPVRFAAIEFTLSVRSFHVPPTPRTSA
bacteria_189802		51147.6	82539.1		-0.690416	0.161962		2.01859e-05	0.000108119		Actinobacteria				hypothetical protein		MVSFSCRISPRTSTVILRERSPFATAMVTSEMLRTCAVRFEAIELTWSVRSFHVPATSGTSAWPPSLPSVPTSRATRVTSAAKPLSWSTIVLMVSFSCRISPRTSTVILRERSPLATAVVTSAMLRTCEVRLEASEFTESVKSFHVPATPGTIAWPPSLPSVPTSRATRVTSEAKPRSWSTIVLMASLSCRISPRTSTVILRDRSPLATAMVTSEMLRTWPVRLLAIEFTESVRSFQTPDTLRTSAWPPSLPSVPTSRATRVTSPAKERS
bacteria_371695		11365.7	18150.3		-0.675337	0.262237		0.0100157	0.0214312		Actinobacteria				hypothetical protein		MLRTCAVRLPAIELTESVKSFHTPPTPFTIAWPPSLPSVPTSRATRVTSLAKELSWSTMVLMVFFSSRISPRTSTVILRDKSPLATAVVTSAIFRTCAVRFPAMKLTESVKASHTPPTPFTTA
bacteria_177966		54268.7	86488		-0.672391	0.171997		9.25545e-05	0.000416248		Actinobacteria				hypothetical protein		MLAIEFTESVRSFHVPATPRTSAWPPRLPSVPTSRATRVTSDANDDSWSTIVLIVFLSSRISPFTSTVIFLERSPLATAVVTSAMLRTWPVRLLAMKFTLSVRSFHVPATPCTSAWPPSLPSVPTSRATRVTSDANERSWSTIVLIVFLSSRISPLTSTVIFFDRSPPATAFVTSAMLRT
bacteria_368014		26628.4	42300.8		-0.667732	0.225079		0.00301062	0.00816791		Actinobacteria				hypothetical protein		MDAVALTARQQADLLLLVGALEVEAADIGSGIDLALADNHHVGAARNFLPDGLVRIQGVAALVDVGQLDRLADLDRALVGLFTTGDQLEQRRLAGPVRTDDADDAVGRQLERQVLEQHLVAVFLLQAGDFQHQVAQARAGRDLDVRLGLGGAGVLLRRDHFLVARQAGLGLGLAGLGRAAHPFQFAGQRALAAVGLRLLLHDALGLLLQPAGVVALVGNALAAIELQRPLGDLVQEVAIVGDQDHAAREVFQVMLQPGHRLGVQVVGRFVQQQHVGLGQEQPRQGDPALLAA
bacteria_300026		24217.8	38131.7		-0.654931	0.168648		0.000102997	0.000457966		Actinobacteria				hypothetical protein		MVRLAASRLTLSVRSLKVPPTPGTTAWPPRRPSVPTSRATRVTSAANERNCSTIVFKVSLSSRISPRTSTVIFFDKSPLATAIVTSAMLRTWPVRLLAIELTLSVKSFQTPVTSGTWAWPPSLPSVPTSRATRVTSEVNTESCLIIVLTMLADCRNSPPSGRPSTSSCTVCNRLP
bacteria_134440		17114.7	26733.2		-0.643391	0.201918		0.00144056	0.00443927		Actinobacteria				hypothetical protein		MSDAPICSGIIQFAKPTKAGMMAPNTMIRPCMVVNWLNSSGLTSCRPGWNSSARISSASTPPTISIVNENSRYSVPMSLWLVANTQRRQPAGAPWWSSWAWSS
bacteria_355222		27802.5	43411		-0.642861	0.146802		1.19172e-05	6.76443e-05		Actinobacteria				hypothetical protein		MDVRGEILELKNTINTMVDQLNGFAAEVVHVPATSGTAAWPPSLPSVPTSRATRVTSAAKPLSWSTMTLMVDFSCRISPCASTAILRERSPLATAVATSAMFRTCVVRFDAIEFTLSVKSFHVPATPGTCAWPPSLPSVPTSRATRVTSAAKPLSWSTIVLMVSFSCRISPRTSTAILRERSPFATAVVTSAMLRTCAVRLDAIELTLSVKSFHVPATPGTCAWPPSLPSVPTSRATRVTSAAKPLS
bacteria_63678		31310.5	48436.1		-0.629442	0.179299		0.000447159	0.00164679		Actinobacteria				hypothetical protein		MLMVFFSSRISPFTSTVIFLDKSPLATAVVTSAMLRTWPVKLPAMRFTLSVRSAQVPATPSTCACPPSLPSEPTSRATRVTSDAKELSWSTMVLMVFLSSRISPFTSTVIFLERSPLATAVVTSAMLRTWPVRLPAIRFTLSVRSFHVPATPSTCACPPSLPSEPTSRATRVTSDAKPLS
bacteria_63087		15024.2	23136.6		-0.622892	0.197807		0.00163835	0.00491921		Actinobacteria				hypothetical protein		MTLMVFFSSRISPRTSTVIFLLRSPLATAVVTSAMLRTWPVRLPAMKLTLSVRSFQVPDTPFTCA
bacteria_315119		41618.8	63838		-0.617187	0.181529		0.000674013	0.00232614		Actinobacteria				hypothetical protein		MPRTWLVRLVAIRLTLSVRSFHVPPTPGTWACPPKLPSVPTSRATRVTSDANALSWSTMVLMVSASAAISPFASTVSLRFKLPCATAVTTSAMPRTWLVRLVAIKLTLSVRSFHVPPTPGTAAWPPSLPSVPTSRATRVTSDAKAFSWSTMVLMVFLSARISPFTSTVIFFDKSPLATAVVTSAMLRTWPVRLAAIRLTLSVKSFHVPATPRTCACPPSLPSVPTSRATRVTSEANELSWSTIVLIVFLSSRISPFTSTVIFLDKSPKATAVVTSAMLRTWPVRFAASSLTLSVKSFQVPPTPSTLAWPPSFPSEPTSRATRVTSEANALS
bacteria_110780		38985.6	59266.4		-0.604281	0.171818		0.000436472	0.00161551		Actinobacteria				hypothetical protein		MIFLERSPPAIAVATSAMLRTCAVRLEAMKLTLSVRSFQVPATPGTCAWPPSLPSVPTSRATRVTSPAKALSWSTIVLSVSFSCRISPETFTVIFLERSPPAIAVATSAMLRTCAVRLEAMKLTLSVRSFQVPATPGTWAWPPSLPSVPTSRATRVTSDANELSWSTIVLMVSFSSRISPRTSTVILRERSPRATAVVTLAMLRTCAVRLPHIALTESVRSFQVPATPGTMAWPPSLPSVPTSRATRVTSEANDRS
bacteria_32999		37384.2	56578.2		-0.59782	0.166708		0.000335748	0.0012928		Actinobacteria				hypothetical protein		MLGHAAPDDRVSGLVVGGVALLFLAHRHRAALGAHQDLVARLVEVLHAHVLGVLARSEQRRLVDQVGQVGAGEAGRTAGNGHRIDVHVERHLAHVHLEDLFAAAHVGQVDHHLAVEAAGTQQRRIEHVGAVGRGDHDHALATLEAIHLHQQLVEGLLALVVAAAQAGAAMPADGVDLVDEDDAGSLLLGLLEHVAHARGADADEHLDEVGTRNAEERHFRLAGDRARASSVLPVPGLPTISTPRGMRPPSF
bacteria_19860		34255.2	51165.2		-0.578855	0.168253		0.000580881	0.00206066		Actinobacteria				hypothetical protein		MAVALGHFARKHAAAGAVGIANDGLQSYRRAAIECGLRLRDQLAVEDVLDFVILLLALVDGGAFLRRRLGEQLGEIEALGLPVLDQLAAVEHLHLPDHLIEGTEAEFGHQFAHFLGDEEEIVDDVLGLALEALAQHRVLRRDADRAGVEVALAHHDAAGRDQRRGGEAEFVGAEQGAHHHVAAGADAAVDLHGNAAAQAVDHEGLVGLGEADFPGAAGMLDRCQRRGAGAALEAGDGNVIGARLRNARGDRADADFRLELHRNVARRVDVL
bacteria_311508		31660.5	46466.5		-0.553515	0.167046		0.000921174	0.00302943		Actinobacteria				hypothetical protein		MLFLRGDELVELGDTRLGLGLPGLGALPDPLQLMPDRGFAALVLTLFLLEPLGLLLEVGRVIAFVGEVPSAIELEDPAHHIVQEIAVVGDHQHRAGIFLEMIFEPLDAFGVEMVGGLVEQQDRRLLDQQAGERDPPLLATRQALDRPVRRRAAQRLHGDLELVVERPAVDRVDLALKLPHLLHQSVEIGVVPGIAHLGGDGVEAVDHVGDLASAVLDVLEHRLRRIELRLLRQIADGDVLARPRLALIVLVDSGHDFHQGRLAGAVGADDADLCAVIELQVDVAEHRLLRAGEGLGHVLHDISILSGHGVAKVL
bacteria_146081		45806.4	66453.7		-0.536814	0.166826		0.0012917	0.00405622		Actinobacteria				hypothetical protein		MGHDQDRAGIVAQMAFQPRHRLGVEMVGRLVQQQQFRLVEQQLAERDAAALAAGKLCHIGIVGRAAQRVHRLVDLAVEIPEARGLDLVLQLGHLVGGLFRIVHRQLVVAIKDRLLLGDAQHDVFADVERRVEMRLLLEVADAGALGDPGLAIILLVEAGHDLEQGRLAGAVDAEHADLGVGIERQMDVIEHLPGRVALGQTLHEIDELASHRDPLKPEDLWKFAAADVAAWPPKGNHGNLFSIRSPGMNTGWSPCRPRSRQLKLSFNKSGENWFSGAE
bacteria_368291		17796.8	25812.6		-0.536464	0.172929		0.0019208	0.00560907		Actinobacteria				hypothetical protein		MPVRVLGIDPSLDRPPVELHVVLRERELLPRGHANLLFNQVQPGHFLGHRMFDLQPRVHLEEVEALARRVGAVDDQLDRAGAIISHRPRQSDRLLAHRLAHFGRDERRRRFLDHLLVAALDRAFALV
bacteria_92099		30627	43124.8		-0.493715	0.180371		0.00619606	0.0146302		Actinobacteria				hypothetical protein		MVQEHLLGQGGALAQREQLQHRIFLAGQMHPGAVDLDRLGVEVHGQLAGPDDRLRMAFRAADDGVDARDQLVAVERLGHVIVGAEAERPDLAVHLADSGQDQHRGRDLRGAQFLEHVIAVHVREVQIEADDVVIVELAEIEALFPEVGRVDVEAFGAEHQLDALGGRRLVFDQQHAHCCFPRSRRQRA
bacteria_95819		11859.7	16457.7		-0.472744	0.186712		0.0113431	0.023547		Actinobacteria		Excalibur calcium-binding domain		hypothetical protein		MTVTATTTATATATATATATAEPEPAATVTATKTVKVTRTVTAQAEADPDSVYYANCSEARAAGAAPIHRGEPGYASPLDRDNDGVACDS
bacteria_372241		19994.4	27672.8		-0.468905	0.177799		0.00835766	0.0185481		Actinobacteria				hypothetical protein		MTFFPAACSGDMNAGVPMETPVPVSAVASAARAIPKSMTRGPSEASSTLDGLRSRWTMPAPWITDSASAMPASSSRTDGTGSGPCSPTAAASEGPAT
bacteria_179354		30476	41755.3		-0.454295	0.153958		0.0031698	0.00851997		Actinobacteria				hypothetical protein		MLRTCEVRFDAIELTWSVRSFQVPATSGTSAWPPSLPSVPTSRATRVTSAAKPLSWSTIVLMVSLSCRISPRTSTVILRDRSPLATAVVTSAMLRTWDVRFDASEFTESVRSFHVPATPGTVAWPPSLPSVPTSRATRVTSEANAFNWSTIVLSVFLSARISPFTSTAILRERSPRATAVATSAMLRTCAVRLLAIEFTESVKSFHVPATPGTCAWPPSLPSVPTSRATRVTSDANAFSWSTIVLMVSLSSSTSPDTSTVILRERSPRATAVVTSAMLRTCVVR
bacteria_107115		35010.6	46961.2		-0.423684	0.180916		0.019187	0.0356653		Actinobacteria				hypothetical protein		MGDHQDRARIILEVVFEPLDALRVEVVGRLVEQQDRGFLEQQPGQRDPPLFAARQVLDAPVRRRAAQRLHRDLELVVERPAVDRVDLALELAHLLHQRVEVGVVLRVAHFGRDGVEAVDHVGDVAGAVLDVLEHRLGGIELGFLRQVADRDVLARPGLAEEILVDPGHDLHQGRLAGAVRADDADLGAVVELQVDVVQHRLLGAGEGLGHVLHHKSILGGHGVAGILC
bacteria_224709		37722.5	50478		-0.420227	0.160795		0.00896372	0.0195735		Actinobacteria				hypothetical protein		MRDVGERAAMDEGRVVLQRLHQVGLHGVLEQHRHGAIGLEVAGIDRRLVAAISDDDVAEALFQVLQVGGKAQDRHDFGGDGDVEAAFARETVGDAAERADHLAQRPVVHVHDAAPDDAAGVDAELVAPVDVVVDQRRKQIMRGGDGVEIAGEVEVHVLHRNDLRVAAAGGTALDAEIRAERSLADADDRSSADAVEAIAETNGGRRLAFAGRRRVDGGDQDQLAVLVALHRLDELGRDFRLVVAVGQKVLGRDADLLADLLDLLFLGAARDLDVGLHFGHDGFPLDWTVEGTGLILLASRLEPGAGMF
bacteria_301807		24556.6	32542.5		-0.406235	0.17373		0.0193713	0.0359246		Actinobacteria				hypothetical protein		MPTSRATRVTSEAKDRSWSTIVLIVFLSSSTSPFTSTVIFFDRSPVATAVVTSAMLRTWPVRLPAMEFTESVKSFHVPATPFTFAWPPSLPSVPTSSATRVTSDANEPSWSTILLIVLAVRRNSPSSGRSSTSSAMVCERSPGNRSRASSCGRRRRSTRWWTSSARSHPR
bacteria_09989		70751.7	93549.6		-0.402973	0.163056		0.0134592	0.0269306		Actinobacteria				hypothetical protein		MQRHGVDHVDQLDLVGRGHDHEIGQGAEISEVERAGMGRTVGPDQPGAIHRETHRQILDRDVVDDLVVGALEEGRVNGGKRPIALRREPRGEGHRVLLGDADVEGALGKGLGDLVEPGARRHRRGDRDDLLVASHLGAKRLGVDSGVARSAGGGLGLDARDDVELDHAMIFVGAALGRRVTLALLGHDMDQHRADVGVADILEHFDQSAHVVAVDRADIIKAELLEQRPAGDPAAGIFLDLLGPVVDRVGHRPGDLLRDLARSEIFVRADQPGEAVAQAADRWRDRHVVVVEDDDQPVAGRRGIVHRLIGHAGGQRAVADHRDRAARVAAQFVGDGEAERGRDRGRAVRRAERVVLALAAPGETGEAAALAEGADAVAAPGQDLVRIGLVADVPDQCVA…
bacteria_310785		33218.2	43860.6		-0.400954	0.179725		0.0256855	0.045165		Actinobacteria				hypothetical protein		MNQDQAILKRRFHLFRIGDEVRRDVATVELHALDRLERRLEALGLLDGDHAVLADLLHRLGNQVADLGVVIGGDGADLGDFLLAGGGHADLLELLDHGANGLVDAALDGHRVGAGRDVLETFAEDRLGEHGRRGGAVAGVIGGLGGDFLHHLGAHVLERISELDLLGDGDAVLGDRRRAELLVDDDIPALGTEGDLHRLGELVDAALQGSARVGVEVQFLAGHD
bacteria_370795		35560.9	46906		-0.399491	0.168303		0.0176136	0.0333055		Actinobacteria				hypothetical protein		MRRRRNETDARRRMPHAGDDSVDLVAGQLPAFAGLGALRHLDLHHVGVDEIFRRHAETAGGDLLDRRAHAVAIRQRLEAIGFFTAFAGVGFAADPVHGDRERRMRLARDRAEAHRAGGETLDDVLGRLDLVELHGLALLVLGGLESEKAAQRQQPLGLLVEGFCKRPVTLQRVAAHGMLQRGNGFCGPCMVLAAGAVGIFAADIESSLVDLRIAERVAMAAYGFLGDFGEAHPLDAGVGAGEVFCDEVGLEAHRVEDLRAAIGLIG
bacteria_192775		30894.5	37608.3		-0.2837	0.127839		0.0264737	0.0462884		Actinobacteria				hypothetical protein		MGRPRVRHVDLVDRDHDRDAGGLGVVERLDRLRHHAVVGRDDQHRDVGRLRTTGTHGGERLVARGVEEGDATLAVVDLGGYLVGADVLRDATGLLGGHVGAAQRVEQLGLSVVDVTHDGDDRRAGLEVLLCPLVLTELEVEGLQQLAVLVLGRDDLDDVVQLVAEQLQRLVVDRLGRGDHLAQAEQHLHERRRVDADLLREVGQRGAARQTDGLAVALADADTTDRRCLHRLELLTTSALRLATTTRRCSCSARS
bacteria_285785		14691.8	12080.1		0.282334	0.128886		0.028483	0.0491402		Actinobacteria	ko:K02358	This protein promotes the GTP-dependent binding of aminoacyl-tRNA to the A-site of ribosomes during protein biosynthesis	tuf	Elongation factor Tu		MFRKLLDEGQAGENVGLLLRGTKREDVERGMVVIKPGTTTPHTDFEARVYILSKEEGGRHTPFFNNYRPQFYFRTTDVTGVVTLPEGTEMVMPGDNTDISVVLIQPIAMDEGLRFAIREGGRTVGAGQVTKIIK
bacteria_244537		51147.5	41157.6		0.313533	0.117554		0.0076502	0.0172642		Actinobacteria	ko:K03727	DEAD DEAH box helicase	helY	putative helicase HelY		MTLAYDFELDDFQLRACREIEDGRGVLVAAPTGSGKTVVGEFAIHLALQTGRKAFYTTLIKALSNQKYHDLVKRYGADKVGLLTGDNSVNGDAPVVVMTTEVLRNMLYAGSSALNGLGYVVMDEVHYLADRFRGAVWEEVIIHLPESVVLASLSATVSNAEEFGDWLDTVRGGTKVIVSEHRPVPLWQHVMAGNRMYDLFANPDRDGRPKDAPRNPAKAVNPELVRLARSEGDRGSRDDRFGRGRGRSMPNGRPNRVWTPGRVDVIERLDAEGLLPAITFIFSRAGCEAAVQQCLTSGLRLNRDADRAVVRSIVEERCADIPDEDLHVLGYFEWLDGLERGIAAHHAGMLPTFKEIVEELFVDGLVKAVFATETLALGINMPARSVVLEKLTKWNGETH…
bacteria_88567		34175.8	27393.8		0.31913	0.130972		0.0148252	0.0289973		Actinobacteria	ko:K02433	Allows the formation of correctly charged Gln-tRNA(Gln) through the transamidation of misacylated Glu-tRNA(Gln) in organisms which lack glutaminyl-tRNA synthetase. The reaction takes place in the presence of glutamine and ATP through an activated gamma-phospho-Glu-tRNA(Gln)	gatA	hypothetical protein		MTTTDWTRRTAAELVDALAAGEVTSVELTRAHLDRIAAVDGAVHAFLHVDADGALAAASAADERRAARVPPRRRRGRARGRPGVRRTARGGQSGLRSRRRADRGQGRADHPGAAHHLRLEDPRGLGAAVRRDRRRAAARGRTADPRQDQHGRVRDGLLHRALRLRPHPQPVGPHPDPRRLRRRLRGRRRRVRGPAGHRHRHRRFDPPARLGHGHGRGQAHVWRRVPLRAGRAGLQPRPSRTLYPHGPRCRFAALGHRWARRDGLDVHRRARAAGRRGCAPRRRQGPAGRRHQGARWRGLPGRGARPVRRVGRPAPGSRCRGRRGVLPELRLRARRLLPDPPQRGVLQPRQVRRDALRRKGPALGRRRPQRRAGDGCHPRRRLR
bacteria_261037		61445.9	49198.6		0.320693	0.134196		0.0168603	0.0321591		Actinobacteria				hypothetical protein		MADAHHDAAGDDERRGRETELLGAQQCGDDDVAAGLELAVGLHDDAVAQAVEQQGLLGLGEAELPGAARVLERGQRGGAGAAVVAGDEHHVRVRLRHTGRDRADADLGDQLHVDPRLRVRVLQVVDQLGEVFDGVDVVVRRRGDQADARGGVPGLGDPRVDLVAGQLTALAGLGALRHLDLDVVRVDQVLGGHAEAAGGDLLDGGPASRVVETVRVLAALTGVGLGAQLVHGDGEGLVRLQGDGAVRHGAGGEPLDDLADGLDLVDGDRGSVRLEAEQPTQGHQPLGLLVHAVRVLLEDVVAAGARGWR
bacteria_32234		23567.8	18711.8		0.332805	0.135322		0.013919	0.0276565		Actinobacteria				hypothetical protein		MTARSAPTGTVSSSPTRISCRVPATGDGISVSTLSVETSSSGSSTSMVSPTLFSQRVTVPSVTDSPRAGMVTRSDML
bacteria_99741		9967.27	7902.34		0.334935	0.127746		0.00874473	0.0192232		Actinobacteria		conserved protein (small basic protein)	sbp	hypothetical protein		MIAVLGLIVGVVVGLVVQPVVPTVVEPYLPIAVVAALDAVFGGFRAMLDGIFDDKVFVVSFLSNVVVAALIVFLGDKLGVGAQLSTGVVVVLGIRIFSNAAAIRRHVSRA
bacteria_107683		57597.4	45374.9		0.344128	0.154733		0.0261479	0.0458275		Actinobacteria				hypothetical protein		MGDHDQRARPAVEEVLEDVEGLDVEVVGRLVEEQHVGLGEQQPQQLEATPLATGQVADPGGQPVAGEPEALQHRGRGDLAVGGLGDPPDRLDRRQHPPLGVEVVQRLGEVLERDRAALLHPTDRGRQRAGDEGQHRGLAGTVDADDPDAVARAEPPGGVREELPLAAHEVDVLDVDDVLAEPLGGEPLQLEPVPRRRHVLDQGVGGLDAELRLRGPRRRAAAQPGQLLAGEVLPADLRGGGLPLALGLGEHERGVPALVGVHDPVVHLPRPLAHRVEEPPVVGDDHHRGRPVREVLGQPRDGLDVEVVGGLVEHDQLVLAEQQRGQRAAPALATGQAHDGPVQRDAREQHLDDLPAAGVRGPLVVGHAAEHRLADRVGVDQLVALVQVADVQAATATAR…
bacteria_05104		64758.5	50931		0.346521	0.107241		0.0012325	0.00389592		Actinobacteria		Unextendable partial coding region		hypothetical protein		MSAIGHQGIFRLSGWSRQIHTGFLGPRATWDDSLEFAPFRLRGLHPLCRAFKCPSTMTRIFDSMPACQSRPRGPTTPNMQRLTAITHARFSLIRFRSPLLTESRLLSLPVGTEMFHFPTFPPLALCVQARVTGLASSRVSPFGNPRITVWLSTPRGLSQIPTSFFGSWCQGIHRVPLKTWLQIKDARVHCVVLNIRAVPRPQEWRLRGIRAGCPAVWAWFVHEEGS
bacteria_297793		62006.4	48410.8		0.357068	0.125519		0.00444501	0.0112173		Actinobacteria				hypothetical protein		MTLVEAHALGELELETEGVALLDGDDTFLADLVHRLGDELADGRVSGGDRRGGGDLLLGLDILGRREQVLGDGGDGLLDALLQGHRVRAGGDVAQTLAHERLGQHGGGGGAVTRDVVGLLGDLLDELGPDLLVRVLELDLLGDGDTVVGDRGGAPLLLQDDVAALRAERHLHGVGEGVHTPLEAAARLFVESNKLGHSPRVLPRRDFGGSAGQMPATDGTGVVALMSRPAPGTSSGRLSSHPAGASLITLAH
bacteria_374224		50233.6	39172.6		0.35883	0.135299		0.00799881	0.0178707		Actinobacteria				hypothetical protein		MADQQQRPGVVAEQFLEQFQGFDVEVVGRFVHHQQVRGLREQARQQQPVALAAGQARDRRARAFGGEQEILQVAEHVFAAAADLDEVASLGDVLDRVPVLAQRRAVLVEIGDLQLRAAADLARVRRQFAQQQLEQRGLAAAVGADQADPVAAQDGGAEVADDDLVAAGERHVARLDHLLARRRRLRRFHAHVAGQFAPRGALVAHRLQPAHAAFVARAPRLDALPDPHFLLRQQLVEARVFLRLGIEAFLAPALVVGPVAGPAGELAAIDLDDARRQRAQEAAVVGDEHQCARPGFQESLQPVDRGDVQVVGRLVQQQQVRRAYQRTRQQHAALHAAGQAREGRFAIQAKPVQHLADALVQRPAVRGLDQRLHPSQGIGIDGIGMAEMMELRQLRAQFT…
bacteria_355139		36636.8	28524.1		0.361134	0.15543		0.0201548	0.0370369		Actinobacteria				hypothetical protein		MGRSIGADNARAIDGEQHIQPLDRDVVHQLVVAALQEGRIDRDDGLGAFAGHAGGERHRMLLGDGDVEIALREFAAEAHQARAFAHCGRDRHQLRIRSGHVADPVAEDIGIGWLLRAGLADHALRRVERRDRVVADLVAFGEFVTLALGGNHMQQLRALELLQRAHRCDQRFDVMAVDRPGVVEAHFLEQGGRHEHAFPVFFPATHEFRRRVVLVAEQLLAALAQSVERAAAGHAAKHPGHAADVLRNRHPVVVEDHQQVWFRLHSAGMVQRFVRHPSGHRTIADHGDDLAIVSSARVGDRHSECSRDGRRGMTDTERVVFALLALREWGDAVLLLDRVDAIAAAGQDLVRIGLVANVPDDAVFGRVVQIMQGDGELDHPKTGSEMTAAAADRFDQVRA…
bacteria_229872		49034.8	38075.8		0.364939	0.113244		0.00127044	0.00399798		Actinobacteria		Response regulators consisting of a CheY-like receiver domain and a winged-helix DNA-binding domain		Transcriptional activator protein CopR		MAGAIRDGLRLEAIAADIAGDGDTALELLSVHAYDIAVLDRYIPGPTGDEIAERIVASGSGMPILMLTAADRLDDKATGFELGADDYLTKPFELQELVLRLRALDRRRAHTRPPVREIAGLRLDPFRREVYRDGRYVALTRKQFAVLEVLVAAEGGVVSAEDLLERAWDENADPFTNAVRITVSALRKRLGEPWIIATLPGVGYRIDTQPDAHPWRPIHSCRPRQRPPRHRCGSRLLAPSRSARAPRAVCAAARP
bacteria_113784		30579.6	23555.9		0.376493	0.162404		0.0204359	0.0374354		Actinobacteria				hypothetical protein		MRDEPGHVAVAVDVQDLDQLVVGDHRERQHDLPARRGGRLEQVGLRADGAVEAGHQLLADRVQRRVGHLGEQLREVVEQQPRAVGEHRDRGVGAHRADRLGAGPGHRGQQQPQLLLGVAEGLLAPGDAGVGVDHVLTLGQVVEVQLAGVQPVVVRRLGGELGLDLGVVDDPAAVGVHEEHSARLQPALADHGGRVQVQHPDLAGQDDQAVLGHPVAAGPQPVAVQHGTDQAAVGERDAGRAVPGLHQRRVEPVEGPAGRVHLGVVLPRLRDHHQDRVRQ
bacteria_299787		48252.9	36803.3		0.390795	0.149095		0.00876453	0.0192504		Actinobacteria				hypothetical protein		MTASSAPTSTVSSSLTLISNRVPATGEGISVSTLSVETSSSGSSTATSSPTFFSQRVTVPSVTDSPRAGRVTDVPEPPDGLVSAAGFSASSPAGAGSSAASGSSAFSCSGSGCSSAAGSSLADSSEPPESPPDSPSSPISARIAPTSTVSSSCALISSRVPATGEGISVSTLSVETSSSGSSTATVSPTDFSQRVTVPSVTDSPSAGRLTSVAMEFLRSRLYVGSLWWVRIRCGRAGACRPGPGGPRRALRSGWGGRARAARRPRRGPPSCRSAAPRR
bacteria_211695		14324.2	10925		0.390901	0.141631		0.00578023	0.0138472		Actinobacteria	ko:K01689	Catalyzes the reversible conversion of 2- phosphoglycerate into phosphoenolpyruvate. It is essential for the degradation of carbohydrates via glycolysis	eno	Enolase		MIDYYADLVDSYPLVSIEDPLNEEDWDGWKAMTDRLGDRVQIVGDDLFVTNPVRLQRGIDARTANALLVKVNQIGSLTETLDAVDLAHRSGYRCMMSHRSGETEDVTIADLAVATNCGQIKTGAPARSERVAKYNQLLRIEEILDDAAVYAGRSAFPRFKG
bacteria_06286		15688.6	11950.4		0.392679	0.131764		0.00288095	0.00788635		Actinobacteria				hypothetical protein		MAVDEPLLEVSTDKVDTEIPSSESPMTARIAPTSTVSSSFALISSSVPATGEGISVSTLSVETSSSGSSTATSSPTCLSQRVTVPSVTDSPRAGRFTSVAMRFLSLLAYVFGQECACSALPARARWASPSASFWVGWAWTSDATSSAYASQL
bacteria_208546		25123.5	18990.7		0.403712	0.145663		0.00557909	0.0134676		Actinobacteria				hypothetical protein		MGDDDHGHAVPGQLLHDFEDLVDHLGVQGRRRLVEEHDLRVHRQRPRDGDTLLLAARELRGVLVGLGAHADPVEQGAGIRRGLRLVGLAHLDLAQHHVLEHGLVREQVERLEHHADVGAQPGQRLALLGQRLSVDRDGAVVDRLQAVDRAAQRRLARPGGADDHDDLPAGDRQVDVLENVQRAEVLVDALQDDQVTARYRVFLGHRYFGHRSGAPSSSVSEDSSDHLRPASLHLRGI
bacteria_124218		40825.5	30773.1		0.407822	0.129237		0.00160157	0.00482886		Actinobacteria	ko:K03657	DNA helicase	pcrA	ATP-dependent DNA helicase UvrD1		MSTLFDDSFPLPSGSPPAAPEAAEQHAERSRGTAALLEGLNPQQRAAVVHEGSPLLIVAGAGSGKTRVLTHRIAYLLGERKVHPGAVLAITFTNKAAGEMKERVTALVGGRAKAMWVSTFHSACVRILRREAAHLGMKSTFSIYDQADSQRLMTLVTRDLDLDPKRYPPRSFSNQVSNLKNELVDHETFAGRAETHLEKTLAEAYRLYQRRLHEANAFDFDDLIMTTVHLLQAFPDVAEHYRRRFRHVLVDEYQDTNHAQYVLVQELVTGGDPSLGVPPAELCVVGDADQSIYAFRGATIRNILAFEQDYPDATTILLEQNYRSTQTILSAANAVISRNASRKPKNLWSDAGEGAPIVGYVADNEHDEASFVAQEVDRLSDEEGVLPSQVAVFYRTNAQ…
bacteria_218189		39147.9	29304		0.417855	0.126639		0.000968328	0.00316331		Actinobacteria	ko:K01689	Catalyzes the reversible conversion of 2- phosphoglycerate into phosphoenolpyruvate. It is essential for the degradation of carbohydrates via glycolysis	eno	Enolase		MASIDAVGAREILDSRGNPTVEVEVALDDGTIARAAVPSGASTGQFEAVELRDGDKKRYGGKGVEKAVLGVLDEIGPALVGFEASEQRLVDQALIDLDGTPTKSRLGANALLGVSLAVARAAAESAELPLFRYVGGPNAHLLPVPMMNILNGGAHADTGVDVQEFMVAPIGATTFREALQWGAEVYHALKSVLKQRGLATGLGDEGGFAPDLANNREALDLIVEAIGTTGLKAGSDIALALDVAATEFHASGSYAFEGTKKSAEEMTAYYAELVSAYPLVSIEDPLDEDDWAGWKTLTDELGSRVQIVGDDLFVTNPERLERGIRESTANALLVKVNQIGTLTETLDAVSMAHRNGYRCMMSHRSGETEDTTIADLAVATDCGQIKTGAPARSERVAKY…
bacteria_171972		28744	21326.4		0.43062	0.177084		0.0150269	0.0293334		Actinobacteria				hypothetical protein		MLEHGEKVLHGADLLVGDEDVRLLEDCLHPLGVGDHVRRQVALVELHAFRELELEAKGLAFLDVHDAVLADLLDRVGDDIADLAVARGDRRDARDVFLARDRLRLGLEVLDDRVNRGLDAPLEPHRVGAGGDVLQALADDGLSEHRCRRRAVAGDVVRRRGDFTHELCALVLEDVLDLDLSSDRDAVIRDRGRAELLVEHDVAPLRAKGDLDRVGEDVHAALESAPGILVELQLFVSHAFFFLLRLTTLRRPARAYR
bacteria_226687		22482.1	16632.1		0.434833	0.192642		0.0239951	0.0426252		Actinobacteria		Aminotransferase	aspC	Aspartate aminotransferase		MDGETNSSTLVRSVPVEVLADETQDYKVTVEQLEAARTDRTKVLLFVSPSNPTGAVYTSDEIRAIGRWAEDHQLWVLTDEIYEHLVYDGVDTGSMPVLCPFLADNCVVVNGVAKTYAMTGWRVGWMIGPTDLVKAATNLQSHATSNVSNVAQRAALAAVSGDLTAVEEMKVAFDRRRKTIVGMLNEIDGVVCPTPHGAFYAYPQVKGLLGKEHDGRVIETSAELAEYILDKAEVAVVPGEAFGSPGYLRLSYALGDDDLVEGITRLQKLFA
bacteria_208179		90886.3	67199.5		0.435619	0.13757		0.00154276	0.00469119		Actinobacteria				hypothetical protein		MALSGEVLDRLPREVGVDRGRAVADQQRDVVDLAHVPGLDEQADLGAGLLSDEVVMHRPGQQQRRDRGQLGGGVPVGEHDDACPVGDRLADLLADLVDPVRHRPAAALDVVQAAGDVGDEARHVTVAVDVPDLGQVVVGDDRERQHHLAAGRGSRLEQVGLGTDGAVERGDELLADGVQRRVRDLCEQLREVVEEQPGLLADCRDRGVGAHRADRLGPGVRHRGEQDPQLLLGVAEHLLAPGHRGVRVHDVLPLGDVVEVDQAGVEPLVVRVLRGQLGLDLLVLDDAVLVGVDEEHPSRLEPALADDLRRVDVEDADLGGEDDQTVVGDPVARRAQPVAVEDRADLGAVGEDHAGGAVPRLHHRGVELVEGPALRVHLGVVLPRLGDHHQHRVRQRAAA…
bacteria_41716		34759.3	25660.1		0.437901	0.17004		0.0100158	0.0214312		Actinobacteria	ko:K01474	PFAM Hydantoinase B oxoprolinase	hyuB	hypothetical protein		MAELDVNEGIVPLIEMKFPPPGTLLTPVFPAPTNARTFVILRLLGVLAGVVAKAVDGKMPADQETIRYTGVYGDDLEGRPYLMREVLGGGSGGRYYADGEDTIHVVPDSRNLPSEFTEARFPFRVESLGLAKDSGGAGQFRGGLGYEKQIRMLKDAHFMSIADRSILACWGVKGGLAGKPFQVTVNPGGPHEREVDALADAEPIKAGELIRIRTTGGGGWGNPLDRDPALVVRDVVWQKVSAEAAFTSYGVVLTGSLDDDSLGHDADATAAERSARPAGSEAFFDRGPGYARLAAGATSAAVDWLS
bacteria_285222		24665.4	18111.8		0.445608	0.168915		0.00833832	0.0185075		Actinobacteria	ko:K01011	sulfurtransferase	sseA1	Putative thiosulfate sulfurtransferase		MVLVEVDEDTAAYEKNHIRGAVRLDWKKDLQDPVRHDFVSKAQFESLLSAKGIGNDDTVVLYGGNNNWFASYAYWYFKLYGHDDARLLDGGRKKWELDSRELVETVAVRTCTTYTAKDQDRSIRAFRDEVEAAIGQKNLVDVRSPDEYSGKLLAPAHLPQEQSQRPGHIPTAANIPWSQAANDDGTFKSDDELTALYAGKGVDLGKDTIAYCRIGERSAHTWFVLHELLGQPNVKNYDGSWTEWGSLVGVPITIGEQP
bacteria_23518		47927.8	35162.4		0.446821	0.168088		0.00785467	0.0176108		Actinobacteria	ko:K03701	The UvrABC repair system catalyzes the recognition and processing of DNA lesions. UvrA is an ATPase and a DNA-binding protein. A damage recognition complex composed of 2 UvrA and 2 UvrB subunits scans DNA for abnormalities. When the presence of a lesion has been verified by UvrB, the UvrA molecules dissociate	uvrA	UvrABC system protein A		MHSGSLKELLANAESQTGQYLSGKKAIPLPDVRRPQDPSRRLTVHGARENNLQDIDVSFPLGLFTAVTGVSGSGKSTLVNDILYTHLARELNGARNVPGRHTRVDGDDLVDKVVHVDQSPIGRTPRSNPATYTGVFDHVRKLFAETTEAKVRGYLPGRFSFNVKGGRCENCAGDGTIKIEMNFLPDVYVPCEVCHGARYNRETLEVHYKGKSIADVLNMPIEEATEFFEAVPAIARHLNTLKDVGLGYVRLGQAATTLSGGEAQRVKLASELQKRSTGRTVYVLDEPTTGLHFEDISKLLKVLSGLVEKGNTVIVIEHNLDVIKTADWVVDMGPEGGAGGGLVIAEGTPEEVAAVPTSHTGKFLREILGADRISDGAPVKAPRKAAAKKTVAARATTRK…
bacteria_102739		27776.5	20356		0.44844	0.152109		0.0031968	0.00857299		Actinobacteria				hypothetical protein		MVGWFVEQQHVRFLQQQLAQRDAAFLATRQLADDRLPRRQAQCVGGHFQLVFQRVRVAGCEDRLEPLLFGGELVEVGAFLGIRLVHLVQCGLRLQNLAHALLDCFAHGMRRIQLRLLRQIADLDAGLRPRLADEILVDAGHDLQHRRLAGAVEAEQADLGAGEERQRDVLDDLALGRHGLADAVHGVDVLRHWSSAGGSGGPALGRAADMFRDSRQLSRNRPLHAS
bacteria_294520		24610.9	17999		0.451363	0.16149		0.0051901	0.0127285		Actinobacteria	ko:K03701	The UvrABC repair system catalyzes the recognition and processing of DNA lesions. UvrA is an ATPase and a DNA-binding protein. A damage recognition complex composed of 2 UvrA and 2 UvrB subunits scans DNA for abnormalities. When the presence of a lesion has been verified by UvrB, the UvrA molecules dissociate	uvrA	UvrABC system protein A		MADRLIVRGAREHNLKNVSLDLPRDSLIVFTGLSGSGKSSLAFDTIFAEGQRRYVESLSSYARQFLGQMDKPDVDFIEGLSPAVSIDQKSTSRNPRSTVGTITEVYVTSRRCARCRFRTSRSAASRAAT
bacteria_235216		28785.1	20990.8		0.455596	0.115238		7.70052e-05	0.000353791		Actinobacteria				hypothetical protein		MGRTGDDRVADPQGAALDQDRCHRTATAVQVRLDHEALGVLVGVGPQVQRGVGGQDDRLEQLVEVQVRLGGHVDEHRVAAVLLRDEAVLGQLATDLGGVGVGLVDLVDRDHDRHTGGLGVVERLDRLWHHAVVRRDHEDRDVRGLRAAGTHGGERLVARGVDEGDPPVLAVDLGVDLVGADVLGDATGLLLHDVGVTQRVEQLGLSVVDVAHHGDDRRTRHQVALDALVGAELQVEGLEQLAVLVLGRDDLDDVVELLTEKLQRRVVDRLGRGDHLAEREQHLHQRSRIDADLLGEVGQRCHPGAAR
bacteria_22922		28691.5	20830		0.461956	0.127133		0.00027945	0.0010995		Actinobacteria	ko:K01849	Methylmalonyl-CoA mutase	icmB	Methylmalonyl-CoA mutase		MGVTAGPIRVVVAKPGLDGHDRGAKVIARALRDAGMEVIYTGLHQTPEQIVDTAIQEDADAIGLSILSGAHNTLFAAVIDLLKEREAEDILVFGGGIIPEADIPPLKEKGVAEIFTPGATTRSIVDWVRENVRQPAGA
bacteria_290608		63272.4	45790.6		0.466543	0.0994657		2.72544e-06	1.82005e-05		Actinobacteria	ko:K03696	associated with various cellular activities	clpC	ATP-dependent Clp protease ATP-binding subunit ClpC1		MRIRRMTAPPDLREFDERIANVRREKESAIDAQDFEKAASLRDREKTLLQEKAQREKEWKAGDMDVVAEVDEELIAEVLATATGIPVFKLTEEESQRLLRMEDELHRRVIGQEQAVKALSQAIRRTRAGLKDPKRPGGSFIFAGPSGVGKTELSKTLAEFLFGDEDSLIQLDMSEFSEKHTVSRLFGSPPGYVGYEEGGQLTEKVRRKPFSVVLFDEVEKAHPDIFNSLLQILEDGRLTDSQGRVVDFKNTVIIMTTNLGTRDISKGFNLGFADSSNINAGYDRMKSKVQDELKQHFRPEFLNRIDDIVVFHQLTPEEIITIVDLMLAKLDERLRDKDMGLELTQPAKDLLAKKGYDPVLGARPLRRTIQREIEDVLSEKILFGEVRPGQIVLVGTEGE…
bacteria_294077		8594.43	6213.44		0.468014	0.179739		0.0092181	0.0200095		Actinobacteria	ko:K02878	Binds 23S rRNA and is also seen to make contacts with the A and possibly P site tRNAs	rplP	50S ribosomal protein L16		MTRHIRRGGKVWINIYPDRPLTKKPAETRMGSGKGSPEWWVANVKPGRVLFELAGPPEPLAREAMRRAMHKLPMKCRFIVREVGD
bacteria_327942		15771.1	11366.2		0.472511	0.168739		0.00510626	0.0125648		Actinobacteria	ko:K03782	Bifunctional enzyme with both catalase and broad- spectrum peroxidase activity	katG	Catalase-peroxidase		MTENHDAIVTEPKAAEAGGCPVAHGRAAHPTQGGGNRQWWPERLNLRILAKNPADTDPMGEGFDYAAEFTALDLAEVKGDIEQVLTTSQDWWPADFGNYGPLMIRMAWHSAGTYRISDGRGGAGAGQQRFAPLNSWRSAAGRRRRRRGRR
bacteria_246517		72415	52057.6		0.476171	0.157286		0.0024665	0.00692235		Actinobacteria	ko:K01955	carbamoyl-phosphate synthetase ammonia chain	carB	Carbamoyl-phosphate synthase large chain		MRDKNDNVVVVCSIENFDPMGVHTGDSITVAPSMTLTDREYQRLRDIGIAIIREVGVDTGGCNIQFAINPDDGRIIVIEMNPRVSRSSALASKATGFPIAKIAAKLAVGYTLDEIPNDITEKTPASFEPTLDYVVVKAPRFAFEKFPSADSTLTTTMKSVGEAMAIGRNFTEALQKALRSLEKKGSQFTFVGEPGDKALLLEEAVRPTDGRINSVMQAIRAGATPEEVFEATKIDPWFVDQLFLIKEIADELAAAEKLGPELLAEAKRHGFSDVQIADIRGLREDVVREVRHALGVRPVYKTVDTCAAEFAAKTPYFYSSYDEETEVAPREKPAVIILGSGPNRIVRILRTSELDLCIRKVVRHKGVLKLLLVLSVVGATHGCVVMAPLVSSSVERTVIL
bacteria_278715		32605.2	23404.8		0.478302	0.150646		0.00149835	0.00458614		Actinobacteria		aldo keto reductase		Aldo-keto reductase YhdN		MRYIKLRDLEVSRIGLGAMGMSHGYTGSGTDDAESIRTVHRALELGVTLIDTAEIYGPYTNEELLGRALRGRRDKVVLATKFGLVSHAGEGAWNLDSGPANIRTAVEGSLKRLGTDHIDLYYQHRVDPNTPIEETAGAVKELIDQGKVRAFGLSEAGPDTIRRAHAVQPVTAVQSEYSLWTRGIEERVLPVLRELNIGLVPFSPLGRGFLTGTVRSTDQFDDDDFRRDNPRFTGENFQRNLALADEVKALATEVGATPAQVALAWLLAQGDDIAPIPGTKRVSRVEENTAADTVTLTSEQLHKLSSLPPAAGDTHTAAQARMLER
bacteria_337933		36291.9	25985.4		0.481933	0.169889		0.00455744	0.011434		Actinobacteria		reductase		hypothetical protein		MTATYTFDVFSSLDGYAAAGGDWTGYWGKQGPELLDHRLALYREEQRMVFGATTYRAFAQMLAESTEDSDVRDPWVTRMRNLPTTVVSTTLEGPLDWPDATVASGDAVDVVARLKKESDVPLRSHGSLAMNRALMAAGLVDRVQVTLFPVITGRTGLDPVFQGAADFDLELLESRTLDGHTQELVYRPTLH
bacteria_103969		27367.5	19506.8		0.488432	0.149613		0.00109607	0.00352357		Actinobacteria	ko:K03702,ko:K08999	damaged site, the DNA wraps around one UvrB monomer. DNA wrap is dependent on ATP binding by UvrB and probably causes local melting of the DNA helix, facilitating insertion of UvrB beta-hairpin between the DNA strands. Then UvrB probes one DNA strand for the presence of a lesion. If a lesion is found the UvrA subunits dissociate and the UvrB-DNA preincision complex is formed. This complex is subs…	uvrB	UvrABC system protein B		MRPVSKIERSVAPFEVVSPYQPSGDQPAAIAELEKRIRAGEKDVVLLGATGTGKSATTAWMIEKLQRPTLVMAPNKTLAAQLANEFRELLPNNAVEYFVSYYDYYQPEAYVPQSDTYIEKDSSINEEVERLRHSATSSLLTRRDVVVVASVSMYVSVCGTYASGW
bacteria_150884		26396.1	18784.1		0.49086	0.172954		0.0045383	0.0114022		Actinobacteria				hypothetical protein		MRDVRADRLHAALRDHASGIDHHHAIGERFGLFQVMRGEQHAAALCDEFADRAPQGLPRLDVQARGRLVEEQQPRPAADRQRELHAPLLAAGELAVIALQQAIQAGHRDAVGDAARRGVVAAGELQQFAHAQRVGNARRLQHHADAAPGRQLLRRLPEEPHLAGVGGHQAEQQADRGGLAGTVGAEDGKQFAAVDLEVDAIERLHLSVGLMHATKAGQRRSLPGYLRRHCRSLPWIRCTGWPGCVPRGSRGRQRSRMTSVR
bacteria_339133		64839.2	46091.3		0.492354	0.196182		0.0120843	0.0247084		Actinobacteria				hypothetical protein		MPELMTTFQRGSTLRREVLTLLAVIKPNNRRSTSELSCVQTFAVQTTQWTTRFAPARQMLLRKEVIQPHLPVRLPCYDFVPIASPTFDSSLRKRLGHWLRVLPTFMT
bacteria_251942		6265.68	4447.52		0.49466	0.195894		0.0115651	0.0239039		Actinobacteria		Protein of unknown function (DUF664)		hypothetical protein		MSSSARSSSTRKSRTGETFSLRWILVHMIEEYSRHNGHADLLRESIDGVVGE
bacteria_185653		40526.5	28631.2		0.501277	0.135186		0.000208869	0.000853937		Actinobacteria	ko:K02337	DNA polymerase involved in damage-induced mutagenesis and translesion synthesis (TLS). It is not the major replicative DNA polymerase	dnaE	DNA polymerase III subunit alpha		MESDPDVRRVVDTAIGIEGLKRQWGVHAAGVIMSSEPLVDVIPLLRRPADGAMITQFDYPTCEALGLIKMDFLGLRNLTILDDALRNIVANRSQVIDLDALSKDLTDQPTYDLLARGETLGVFQFDGGPMRSLLRAMKPDNFEDISAVGALYRPGPMGAGSHTKYALRKNGLEPITPIHPELAAALEEVLGQTYGLIVYQEQVILIAQKLAGYTLGKADLLRKAMGKKKREVLDAEFVGFSEGMAANGYSMAAIKTLWDILVPFSDYAFNKAHSAAYGLVSYWTAYLKANFPAEYMAALLTSVRDDKDKSALYLNECRRMGIKVLPPDVNESDSNYTPRGTDIRFGLSAIRNVGENVVASIAATRAAKGRFTDFYDFLRKVDSVACNKRTIESLIKAGA…
bacteria_109216		40162.6	28288.2		0.50567	0.127373		7.18761e-05	0.000332648		Actinobacteria	ko:K03657	DNA helicase	pcrA	ATP-dependent DNA helicase Rep		MSSLFDDSFLADLKPSGAHEEEPPPPPEDGAAEPLPDDLFGGRFDVPPDRDAYYRDGAPRPAVDAAALLDGLNENQRAAVVHSGSPLLIVAGAGSGKTRVLTHRIAHLLAERHVHPGQILAITFTNKAAGEMKERVEQLVGPRANAMWVMTFHSACVRILRRESKRLGFTSSFSIYDAADQKRLMALVCKELDLDPKRYQPNALLHWVSDLKNELRDAEEATKDAHNKLEETYAAAYTLYQRRLREANALDFDDLIMTTVTSSRRSPRSARPTGAGSGTCSSTSTRTPTTRSTPSSTSSAPTRWRTRSPAPRWLRRLRSNRLETPRASSRPS
bacteria_348351		5970.19	4201.07		0.506944	0.183805		0.0058146	0.0139172		Actinobacteria		Protein of unknown function (DUF664)		hypothetical protein		MVAGIGSLDAVTHHDGQPYSLRYVLTHMIEEYARHNGHADLLRELIDGSTGE
bacteria_322139		35939.4	25248.3		0.509385	0.147582		0.000557425	0.00199387		Actinobacteria	ko:K00175	Ferredoxin oxidoreductase	korB	2-oxoglutarate oxidoreductase subunit KorB		MAETGAEGTGTIEALSLVPKAEARQSMKDFKSDQEVRWCPGCGDYAILAAVQGFMPELGLAKENIVFVSGIGCSSRFPYYMNTYGMHSIHGRAPAIATGLAASRRDLSVWVVTGDGDALSIGGNHLIHALRRNVNLKILLFNNRIYGLTKGQYSPTSEVGKITKSTPMGSLDAPFNPVSLALGAEASFVARTIDSDRKHLTEVLRQAAAHPGTALVEIYQNCNIFNDGAFEALKDRQSAEEAVIRLEHGQPIRFGAGGTSRSSEAEGGGGARGVVRDRATGDLKVVTVTPENAADVLVHDAHAASPTTAFALSRLADPDTLHHTPIGVLRSVERPVYDTQLADQLDTAIEQHGKGDLAALLAGGDTWTVVG
bacteria_121647		104764	72519.9		0.530684	0.141483		0.000176226	0.000733546		Actinobacteria				hypothetical protein		MEEVNELREKINLGQEQFNIAETAYNSALADFNELNLQMMHQAFAHCAIFPTAASRRSLGRVSVPVWPVALSGRLPVVALVSHYLTNKLIGREPIPDRKTFHTIPMRASVVSGISSGFPGLFQSLGQVAHVLLTRSPLITQEQALKITVRLACVKHAASVRPEPGSNSPLMFKHHEPQRPTAITEPQKRVITQAEVKQPAKN
bacteria_332176		53816.7	37201.9		0.532668	0.106679		5.93845e-07	4.63892e-06		Actinobacteria				hypothetical protein		MRGRTTISRRSTSEHPLPQDVCLRSAGLDPPPWGSANVLLRKEVIQPHLPVRLPCYDFVPIASPTFDGSLHKG
bacteria_319439		14888.2	10263.5		0.536633	0.187169		0.00414239	0.0105943		Actinobacteria		cytochrome C	ccsA	Cytochrome c biogenesis protein CcsA		MGAVATILYLFKDSYESKLASGGRPGTFATSVMERLPASASLDKFSYRVNAAVFPLWTFTIIAGAIWAGDAWGRYWGWDPKETWAFITWVAYATYLHARATAGWKGRKAAYIALIAFACFLFNYYGVNIFVTGKHSYAGV
bacteria_00440		32635.8	22416.9		0.541886	0.169046		0.00134804	0.00420993		Actinobacteria	ko:K03040	DNA-dependent RNA polymerase catalyzes the transcription of DNA into RNA using the four ribonucleoside triphosphates as substrates	rpoA	DNA-directed RNA polymerase subunit alpha		MLIAQRPTLSEEVVDDYRSRFVIEPLEPGFGYTLGNSLRRTLLSSIPGASVTSIRVDGVLHEFTTVPGVKEALTDIILNIKGLVVSSEVDEPVVMYLRKQGPGPVTAADIAPPAGVEVHNPDLHIATLNGKGKLEMELTVERGRGYVSAVQNKQQGQEIGRIPVDSIYSPVLKVTYKVEATRVEQRTDFDKLIVDVETKRSMLPRDAMASAGKTLVELFGLARELNVEAEGIDMGPSPTDAALAADLALPVEDLELTVRSYNCLKREGIHTVGELVSRSEADLLDIRNFGAKSIDEVKAKLHSMGLALKDSPPGFDPSTAVDSYGSDDDTAYVEDEQY
bacteria_319377		26988	18532.9		0.54225	0.14125		0.000123564	0.00053331		Actinobacteria	ko:K01802,ko:K03767,ko:K03768	PPIases accelerate the folding of proteins. It catalyzes the cis-trans isomerization of proline imidic peptide bonds in oligopeptides	cypB	Peptidyl-prolyl cis-trans isomerase B		MAEQLYATLKTNHGDIEVRLLPNHAPKTVRNFVELAQGEREWTHPGTGEKSTKRLYDGTIFHRVISGFMIQGGDPLGTGIGGPGYEFKDEFHPDLGFNKPYLLAMANAGPGTNGSQFFITVSPTAWLNRKHTIFGEVTDAAIQKVIDAIAGVKTTRPNDRPVNDVVIEQVVVETRQG
bacteria_358298		27363.6	18763.5		0.54435	0.183695		0.00304323	0.00824374		Actinobacteria		protein conserved in bacteria		hypothetical protein		MTTTPSDPTAALPGRPPVVDLAAWQAARDELLLREKAHTRAGDALAAARRRLPMVEFDGAAEVVGPDGPVPFLDLFQGRDELVVYKHMWYDGAPHQGQCEGCTTTAWHVKDAVYLNARGVSFAILTTGRWDEVASYVEFMGYTQTWYSVRGVEAPVGGEMGYLTCFLRDGDRVFLTYSTTGRGNEPVNGSLSLLDMTPYGRGEAWEDNPEGRPVIGDVREGHPSEGRQACWYWRSDADGVATWGPTSRPVPQWTRPGATPVVSLGRHGHHH
bacteria_96311		53270.6	36524.1		0.544499	0.145769		0.000187443	0.00077658		Actinobacteria	ko:K00962	Involved in mRNA degradation. Catalyzes the phosphorolysis of single-stranded polyribonucleotides processively in the 3'- to 5'-direction	pnp	Polyribonucleotide nucleotidyltransferase		MLPRVHGSALFELGETQILGVTTLNMLRMEQMIDTLNPENRKRYMHNYNFPPYSTGETGRVGSPKRREIGHGALAERAILPVLPAREEFPYAIRQVSEALGSNGSTSMGSVCASTMSLLQAGVPLRAPVAGIAMGLISDTIDTADGSQVQYAALTDILGAEDAFGDMDFKVAGTREFVTAIQLDTKLDGIPASVLASALTQAKEARLHILDVMHEAIDAPDEMSPYAPRIISIKIPVDQIGAVIGPKGKMINQIQDETGAEISIEDDGTIYIGATDGPKAEAARAMINAIANPTMPEVGERYLGTVVKTTTFGAFVSLVPGRDGLLHISKLRGLAGGKRVDNVEDVVKVGDKVQVQIAEIDPRGKLSLIPVEADTAGGAGDAGDAPAAADVEA
bacteria_334893		10465.3	7140.65		0.551502	0.227813		0.015484	0.0300265		Actinobacteria	ko:K07033,ko:K09014	assembly protein sufB	sufB	hypothetical protein		MLEGAHGSRSTVKCDALLIDTVSRSDTYPYVDVREDDVTMGHEATVSKVSDDQLFYLMSRGLTEHEAMAMIVRGFVEPIAKELPMEYALELNRLIR
bacteria_295670		39091.2	26654.4		0.552443	0.118676		3.2388e-06	2.12434e-05		Actinobacteria		acyl-CoA dehydrogenase	fadE25	putative acyl-CoA dehydrogenase fadE25		MIAASEDVKARYLAPVARGEAMFSYALSEPEAGSDAAAMKTRAVRDGDHWILNGVKRWITNAGVSEYYTVMAVTDPTKRSKGISAFVVEKSDPGVSFGAPEKKLGIKGSPTREVYFDNVRIPADRMIGEEGTGFATAMKTLDHTRITIAAQALGVAQGAFDYAKGYVQERKQFGKAIADFQGIQFMLADMAMKIEAARQLTYAAAAKSERLDSDLTFQGAAAKCFASDVAMEVTTDAVQLLGGYGYTRDYPVERMMRDAKITQIYEGTNQVQRIVMARNLP
bacteria_150800		35649.4	24307.1		0.552483	0.142517		0.000105916	0.000469172		Actinobacteria	ko:K00053	Involved in the biosynthesis of branched-chain amino acids (BCAA). Catalyzes an alkyl-migration followed by a ketol- acid reduction of (S)-2-acetolactate (S2AL) to yield (R)-2,3- dihydroxy-isovalerate. In the isomerase reaction, S2AL is rearranged via a Mg-dependent methyl migration to produce 3- hydroxy-3-methyl-2-ketobutyrate (HMKB). In the reductase reaction, this 2-ketoacid undergoes a metal-…	ilvC	Ketol-acid reductoisomerase (NAD(+))		MRRQYEEGRGVPCIAAVEQDATGNAFALALSYAKGIGGTRAGVIKTTFTEETETDLFGEQAVLCGGTAALVKAGFETLTEAGYQPEIAYFECLHELKLIVDLMYEGGLEKMRWSVSETAEWGDYVTGPRIITDATKAEMKKVLAEIQDGTFAREWMAEYHGGLKKYNEYKQQDSEHLLETTGKQLRKLMSWVDEEA
bacteria_300056		20483.6	13913.6		0.557962	0.15476		0.000311749	0.00120989		Actinobacteria		alkyl hydroperoxide reductase Thiol specific antioxidant Mal allergen		Protein DipZ		MSDTTPRRVRVRAPELVGKGGWLNTGDRQYTLSDLRGRIVILDFWTFCCINCLHVLDELRELEEKHADTVVVIGVHSPKFVHEADPVALAQAVERYGVHHPVLDDPELVTWQAYTARAWPTLVLVDPEGYVVAQYAGEGQARAV
bacteria_69583		18678.2	12683.8		0.558427	0.1849		0.00252647	0.00706933		Actinobacteria				hypothetical protein		MEVHDHQDRAEGDAAELEVAAEGHGHPTDAGDQAGREAHQVDRVAEVHAVLDPDLGSHQTDHAVEDHRDPAEDAARGRGDDRAELRAQAEQDRHHRRHVVRRGRVDLGRTHDPDVLGVRRGRRAAEGAGEGGGEAVRGEGTAHVGIEVGLGHLGDGLDVPGVLRDQGDHARQDQQDEGQREAGAVHHGHAVRELAAREPDPVRSLDPGPADPVVVDLLAGRGGGAGDAVDLAEEGVGEPGQHEAEDQGE
bacteria_360997		10810.9	7330.13		0.560635	0.202913		0.00572844	0.0137484		Actinobacteria				hypothetical protein		MAPPWAASKTWAPSWRSASSESSAPASTGNAMSTRRLVTRVFQTKMGIRNMVMPGARMQMIVVMKLTAPRMVPRPAIHRPMIHRSPPTPGDRTASESGV
bacteria_254851		29788.6	20180.9		0.561762	0.153632		0.000255644	0.00102015		Actinobacteria	ko:K02003	ABC transporter		Bacitracin export ATP-binding protein BceA		MTSAVTIPRHGGTGGRTAVAARARQVVKAYGSGETRVVALDHVDVDITRGQFTAIMGPSGSGKSTLMHCLAGLDTVSSGQIYLDETEITGLKDKKLTKLRRDRIGFIFQAFNLLPTLNAIENITLPMDIAGRKPDKAWLSQVVETVGLADRLKHRPTQLSGGQQQRVAVARALAARPEIIFGDEPTGNLDSRAGAEVLGFLRRSVDELGQTIVMVTHDLVAASYADRVIFLADGRIVDEMYGPTADQVLDRMKDFDTKGRTS
bacteria_239209		40041.6	27105.9		0.562893	0.157497		0.000351577	0.00134379		Actinobacteria	ko:K06911	Belongs to the pirin family		hypothetical protein		MPAVTVENPLTLPRVTAPAEAVARPVLAVSTAPSGYEGEGFPVRRAFAGINYRHLDPFIMMDQMGEVDYAPGEPKGTPWHPHRGFETVTYIIDGIFDHQDSQGGGGTITNGDTQWMTAGSGLLHIEAPPESLVMSGGLFHGLQLWVNLPAKDKMMTPRYQDIRGGHVQLLTTPDGGALLRVIAGELDGHAGPGITHTPITMIHATLAPGAELTLPWREDFNGLAYVLAGKGAVGAERRPVHKGQTAVFGAGSSLTVRADEKQDSNTPDLEVVLLGGQPIREPMAHYGPFVMNTKDELMQAFEDFQKGRLGTIPAVHGMTEEGI
bacteria_192840		25122.5	16979.3		0.565196	0.202079		0.00515952	0.0126711		Actinobacteria	ko:K03526	Converts 2C-methyl-D-erythritol 2,4-cyclodiphosphate (ME-2,4cPP) into 1-hydroxy-2-methyl-2-(E)-butenyl 4-diphosphate	ispG	4-hydroxy-3-methylbut-2-en-1-yl diphosphate synthase (flavodoxin)		MESALWEASLFEEHGFRDIKISVKHNDPVIMVNAYRLLAERCDYPLHLGVTEAGPAFQGTIKSAVAFGALLSEGIGDTIRVSLSAPPVEEIKVGNQILESLNLRQRGLEIVSCPSCGRAQVDVYKLAEEVTAGLEGMEVPLRVAVMGCVVNGPGEAREADLGVASGNGKGQIFVKGEVIKTVPESKIVETLIEEAMKIAEQMEADGIASGEPSVSVAG
bacteria_189391		19936	13451		0.56766	0.140346		5.23887e-05	0.000253133		Actinobacteria				hypothetical protein		MVDQLSSFADEVTRAWPPRMPSVPTSRATRVTSSAKDDSWSTMVLTVLLSSRISPRASTVILRVRSPLATAVVTSAMLRTWLVRFAAIMLTFSVRSFQVPETSCTSAWPPSWPSVPTSRATRVTSSANDDSWSTIVLTVEVSSRYPLDLRETRAQVLLDGRVGDGHDGAVQGHHHDPDGHGYQGQPRMAAQPLGRRGVRRGGRVDSGLASHAFEANDSH
bacteria_75329		9721.99	6546.94		0.570414	0.209656		0.00651401	0.0152436		Actinobacteria		Protein of unknown function (DUF3117)		hypothetical protein		MAAMKPRTGDGPLEVTKEGRGIVMRVPLEGGGRLVVELNAEEAGSLGDALKAVVG
bacteria_169905		25013.9	16823		0.572268	0.151802		0.000163352	0.000684476		Actinobacteria	ko:K01847,ko:K01849,ko:K11942,ko:K14447	Catalyzes the reversible interconversion of isobutyryl- CoA and n-butyryl-CoA, using radical chemistry. Also exhibits GTPase activity, associated with its G-protein domain (MeaI) that functions as a chaperone that assists cofactor delivery and proper holo-enzyme assembly	icmF	Fused isobutyryl-CoA mutase		MRDRYGAGERGQKLKYHVQTSGRSLHAQEMDFNDIRTTLQALIAIYDNCNSLHTNAYDEAVTTPTEDSVRRALAIQLIINREWGLAMNENPLQGSFIIDELTDLVEEAVLQEFERISERGGVLGAMETGYQRGRIQDESMLYEQRKHDGTLPLIGVNTFRKPHADTAEPGAIELARATEEEKHSQLERVHDFQGRHQEPAHAALAALKDAAVSGENVFAVLMDAARVCSLQQVTDAFFEVGGQYRRNV
bacteria_70408		36442.9	24496.7		0.573064	0.141637		5.21015e-05	0.000252229		Actinobacteria	ko:K01596,ko:K01610	Catalyzes the conversion of oxaloacetate (OAA) to phosphoenolpyruvate (PEP), the rate-limiting step in the metabolic pathway that produces glucose from lactate and other precursors derived from the citric acid cycle	pckG	Phosphoenolpyruvate carboxykinase [GTP]		MVWCDGSEAEYERLSEELVRKGTFRKLDPIKRPNSYYAASDPTDVARVEDRTFICSEKEEDAGPTNHWKAPAEMREIFSGEKGVFRGSMRGRTMYVVPFCMGPLGSDLSAIGVEITDSAYVAVSMRTMTRMGQAVLDELGTDGFFVRAVHTLGAPLAEGEADVPWPCNSTKYISHFPESREIWSYGSGYGGNALLGKKCYALRIASVMARDEGWLAEHMLILKLTPPQGESKYVAAAFPSACGKTNLAMLEPTVSGWTVETIGDDIAWMRFGEDGRLYAINPEAGFFGVAPGTGEHTNANAMKTHSFQNFATQLAGRM
bacteria_222904		11201.2	7496.03		0.57951	0.179589		0.00125152	0.00394619		Actinobacteria	ko:K00330	NDH-1 shuttles electrons from NADH, via FMN and iron- sulfur (Fe-S) centers, to quinones in the respiratory chain. The immediate electron acceptor for the enzyme in this species is believed to be a menaquinone. Couples the redox reaction to proton translocation (for every two electrons transferred, four hydrogen ions are translocated across the cytoplasmic membrane), and thus conserves the redox …	nuoA	NADH-quinone oxidoreductase subunit A		MNAYAPILVLGALGAGFAIFSVVMATLIGPKRYNRAKLEAYECGIEPTPTPAGGGRFPIKYYLTAMLFIVFDIEIVFLYPWAVTFDALGLFGLVEMLLFVLTVFVAYAYVWRRGGLEWD
bacteria_30036		33233.1	22116.6		0.587469	0.169625		0.000533503	0.00192113		Actinobacteria	ko:K00239	succinate dehydrogenase	sdhA	Fumarate reductase flavoprotein subunit		MSESLRNDGRVWVPKKKEDIGKHPDQIPDSDRDYYLERKYPSFGNLSPRDIASRAAKEQCDDGRGVGPGGRGVYLDFRDAIKRESEDRIREKYGNLFDMYERITGENPYRVPMRIYPAVHYSMGGLWVDYQLQTTIPGLFCLGEANFSDHGANRLGASALMQGLADGYFVLPATINDYLARNPHHEPVTDQHPVVQEVLAETEDRLHLLLSVDGDRTPDSFHREVGELMWEFCGMARTDSGLRKALERIPQIREEFWRRIKVPGTGEEFNQSLEKANRVVDYLELAELMCLDALHRAESCGGHFREESQTPDGEAARRDEEFAYAAAWEFTGTGEAPTLHKEDLVFEYVHPTQRSYA
bacteria_13279		10544.3	6992.25		0.592585	0.212271		0.00524403	0.0128252		Actinobacteria	ko:K02965	Protein S19 forms a complex with S13 that binds strongly to the 16S ribosomal RNA	rpsS	30S ribosomal protein S19		MPRSLKKGPFVDDHLIKKVDAQNDKGTKNVIKTWSRRSMIVPAMLGHTIAVHDGRKHVPVFVTESMVGHKLGEFAPTRTFRGHVKDDRRARRG
bacteria_217235		24680.8	16287		0.599621	0.133786		7.39642e-06	4.41387e-05		Actinobacteria	ko:K01869	Belongs to the class-I aminoacyl-tRNA synthetase family	leuS	Leucine--tRNA ligase		MSETNPAAAEVAAPHRYTAAMAADIEARWQDFWDAEGTYSAPNPSGDLAGDPELAARPKKFIMDMFPYPSGAGLHVGHPLGYIATDVFARFQRMTGHNVLHTLGFDAFGLPAEQYAVQTGTHPRVSTEANIENMKVQLRRLGLGHDKRRSFATIDPDYYRWTQWIFLQIFNSWYDEEADKARPIAALIAQFESGERAVPGDHARAWDQLTAAERADILGEYRLAYRRDGRAAIAHRLPGR
bacteria_182217		20942	13786.8		0.603126	0.168613		0.000347591	0.00133029		Actinobacteria		Flavodoxin		8-demethyl-8-aminoriboflavin-5'-phosphate synthase		MAASPTSDDTYRFEDLTALYVNCTLKPSPQLSHTQGLVDKSRAIMDGAGVTTDEIRAVDHDIATGVYPDMTEHGFATDAWPALHEKVMAADILVLAGPIWLGDNSSVTKKVIERLYACSSLLNPQGQYAYYGRVGGCLITGNEDGVKHCAMNVLYSLQHLGYTIPPPAAPPPPR
bacteria_360384		21648.6	14198.3		0.608463	0.149335		4.61172e-05	0.000225731		Actinobacteria	ko:K00331	NDH-1 shuttles electrons from NADH, via FMN and iron- sulfur (Fe-S) centers, to quinones in the respiratory chain. The immediate electron acceptor for the enzyme in this species is believed to be a menaquinone. Couples the redox reaction to proton translocation (for every two electrons transferred, four hydrogen ions are translocated across the cytoplasmic membrane), and thus conserves the redox …	nuoB	NADH-quinone oxidoreductase subunit B		MGLEEKLPSGFLLTTVEQAAGWVRKASVFPATFGLACCAIEMMTTGAGRYDLARFCMEVFRGSPRQADLMIVAGRVSQKMAPVLRQVYDQMPAPKWVISMGVCASSGGMFNNYAIVQGVDHIVPVDIYLPGCPPRPEMLMDAILKLHQKIQTSKLGVNAEEAAREAEEAALKALPTIEMKGLLR
bacteria_66470		19508.8	12766.9		0.611663	0.148632		3.86692e-05	0.000192529		Actinobacteria		response regulator		Transcriptional regulatory protein LnrK		MAVVGEAANGSEAVRMTAELRPDVVLMDVRMPGMDGIEATRRIVAAGGRSRVLVLTTFDLDEYVHAAIRAGASGFLLKDARPEELLAGIRAVASGDAVIAPALTRRLLDEFAQYVPAHRGDSAEDPRLGSLTDREREILVAVGKGWTNGEIAARFVLSESTVKTHVGRVLAKIGARDRIQAVIFAYDHGLARPGVD
bacteria_311655		36629.1	23965.1		0.612099	0.150578		4.8031e-05	0.000233933		Actinobacteria	ko:K00371	nitrate reductase beta subunit	narH	hypothetical protein		MARGKDTRRKVMAQMAMVMNLDKCIGCHTCSVTCKQAWTNRTGVEYVWFNNVETRPGHGYPRRYEDQDTWKGGWELNKKGRLALKAGGRFKKLIQIFSNPVLPSLDDYYEPWTYDYETLTNAPPPGAHPGRPPQVPDHRQGHEDQVVGELGRRPRRIGGDQRAGRLAERGLREDQVRVRADLHVLPAAHLRALPQPVLRGLLPLRRHLQARGGRHRPGRPGPLPRLADVRVRLPLQEDLLQPPHRQGREVHVLLPADRGRHPDRVLGDLRRSPALHRPGPVRRRPGARGGLDPRRARPVRGPALGAARPGRPRGGARRGARRDPT
bacteria_131101		42550.4	27632.8		0.622791	0.156648		7.01598e-05	0.000325387		Actinobacteria		Phosphotransferase enzyme family		hypothetical protein		MADVEQVEVVVAHDERATLRVGEVFLKIDADQTRTDVEVEAMAMAPIPTPEVLWRKPPVLALAAVPGTALGRLGEPSTASSAAWASAGAAARMLHDAPLPPWPGRSLDEIASRLDGECEWLVTNGVLPTDLVTRNRRIAEAALPGTTLGRLGGPSTGSSAAWAAAGAAIRKLHEAPLPPLPGRAGRRIVALAAELDAECELLVKNGVLPADLVTRNRQVAEAALRPWTPAFTHGDLQIDHVFVDGSEVTGIIDWSEAGPGDALFDLATFTLGHEEHLDDVIAGYGTDIDLDEIRAWWSLRSLLGVRWLIEHGFDPFAPGCEVDVLRSRM
bacteria_271602		44744.3	28845.6		0.633375	0.160311		7.78554e-05	0.000357512		Actinobacteria	ko:K03046	DNA-dependent RNA polymerase catalyzes the transcription of DNA into RNA using the four ribonucleoside triphosphates as substrates	rpoC	DNA-directed RNA polymerase subunit beta'		MCYGRSLATGKLVDVGEAVGIIAAQSIGEPGTQLTMRTFHTGGVAGDDITQGLPRVVELFEARVPKGVAPISEAQGRVRIEETEKTKKLVVTPDDGAEEIAYPISKRAKLLVGEGDQVSVGQKLTFGATNPHDVLRILGQRQVQIHLVQEVQKVYNSQGVSIHDKHIEVIVRQMLKRVTIIESGDAELLPGELAERTRFEDENRRVVAEGGTPASGRPELMGITKASLATESWLSAASFQETTRVLTDAAIHAKSDPLLGLKENVIIGKLIPAGTGLPRYRNIRVEPTEEAKAAMYTMGGYDADAAAFDYSPFGSGSGQAVPLEDFDYGPFRTS
bacteria_217937		26734	17223.6		0.634316	0.170686		0.000202184	0.000830836		Actinobacteria	ko:K10545	ABC transporter		Fructose import ATP-binding protein FrcA		MTPLLEVRGIDKSFGPVQVLHDVTFSAHAGEVTALVGDNGAGKSTLVKCIGGIYPIDEGDIVFDGQPVQVHGPRDAGELGIEIVYQDLALCDNLDIVQNMFLGRERRSGLVLDEASMEELAAQTLDGLSVRTVKSIRQQVSSLSGGQRQTVAIAKAVLWNSKVVILDEPTAALGVAQTAQVLELVRRLADTGLAVVLISHNLNDVFAVSDQIAALYLGRMAAQVRTADVTHAQVVELITSGRSGDLGIAQ
bacteria_316692		63991.7	41219		0.634571	0.135476		2.81331e-06	1.87166e-05		Actinobacteria	ko:K03086	Sigma factors are initiation factors that promote the attachment of RNA polymerase to specific initiation sites and are then released	sigA	RNA polymerase sigma factor RpoD		MLSDEDEDDAPAQQVAAAGATADPVKDYLKQIGKVPLLNAEQEVELAKRIEAGLFAEDKLANADKLAPKLKRELEIIAEDGRRAKNHLLEANLRLVVSLAKRYTGRADQTEVALLDEVQEEHAAAGVALGQRDHEAQVGLEEVVLGAAAVLRDPLELLVDLGRDLAALGQLLLREQAGLDPLGELDLHLGVQQRHLADLLEVVLDRVGGRAGDHDLLLGLVGVVGSRDHERGRLLVLDDRRVGLDVLLELLVGHVRQDLLAVRADDRGGVDDLRDLGLAGGLLGGRLRGRLLGRRGLLRRRGGGGLGRRRRGGGLRRRLLGGLRGRGLAGRGGGHGAAAAGAHVDRDPQGAQVTEQRLEVAGFDLGVLTGLPHLLRRQAAGRSTSLDQGRDGWVRQHLG…
bacteria_04670		37071.4	23873.9		0.634858	0.129211		8.95355e-07	6.69811e-06		Actinobacteria	ko:K00789	Catalyzes the formation of S-adenosylmethionine (AdoMet) from methionine and ATP. The overall synthetic reaction is composed of two sequential steps, AdoMet formation and the subsequent tripolyphosphate hydrolysis which occurs prior to release of AdoMet from the enzyme	metK	S-adenosylmethionine synthase		MVTSKKGFDGASCGVSVSIGSQSPDIAQGVDTAYEQRVEGDQDELDKQGAGDQGLMFGYATDETPTLMPLPIHLAHRLSSRLSEVRKNGTIPYLRPDGKTQVTIEYDGDKAVRLDTVVVSSQHASDIDLDSLLAPDIREFVVEVELKALLEDGIKLDTEGYRLLVNPTGRFEIGGPMGDAGLTGRKIIIDTYGGMARHGGGAFSGKDPSKVDRSAAYAMRWVAKNVVAAGLASRCEVQVAYAIGKAEPVGLFVETFGTAKVDAEKIEAAIATVFDLRPAAIIRDLDLLRPIYAQTAAYGHFGRELPDFTWERTDRVDALRAAVGL
bacteria_96784		16449.8	10589.2		0.635454	0.20999		0.00247716	0.00694673		Actinobacteria	ko:K00390,ko:K00957	sulfate adenylyltransferase	cysD	Sulfate adenylyltransferase subunit 2		MFSLRDEFSQWDPRRQRPELWNLYNGRHAPGEHVRVFPLSNWTELDVWQYIAREGIELPEIYFAHEREVFRRAGMWLTAGEWGGPKDGETVEKRLVRYRTVGDMSCTGAVDSAAVTLDDVIAEIAASRLTERGATRADDKMSEAAMEDRKREGYF
bacteria_318391		24380.3	15678.8		0.636863	0.188553		0.000731132	0.00249403		Actinobacteria				hypothetical protein		MRQAEQRMQRRAWRPTSSARVSVRPLSSSTRWKFCGPSPSVVPVHVEVYGFIRSAVEERGRVWRYTSRSRQVGTVFSMPTTEISVSGRVRHIRPLPSDSTTTRVPVSATLKLAPEMPILARRNFSRRCSRAASASSAGESVSPLGAGRPHSLISRAKISRISPRLRWIAGTRMCEGRSLPNCTISSARSVS
bacteria_197410		55735	35757.8		0.640308	0.151722		2.44011e-05	0.000127943		Actinobacteria	ko:K01546,ko:K01547	Part of the high-affinity ATP-driven potassium transport (or Kdp) system, which catalyzes the hydrolysis of ATP coupled with the electrogenic transport of potassium into the cytoplasm. This subunit is responsible for energy coupling to the transport system	kdpA	Potassium-transporting ATPase ATP-binding subunit		MAGTTEAAVADAAQLSSLADETPEGRSIVVLAKEKYGLRERHQGELVGAEWIAFTAQTRMSGVDVEGRRIRKGAAGSVVAWVREQGGEVSEDAGALTDRISEAGGTPLLVAVEDTEGARVLGVLHLKDVVKQGMRERFDELRRMGIKTVMITGDNPLTAKAIAEEAGVDDFLAEATPEDKMALIKREQAGGKLVAMTGDGTNDAPALAQADVGVAMNTGTSAAKEAGNMVDLDSNPTKLIEIVEIGKQLLITRGALTTFSIANDVAKYFAIIPALFAAVYPGLDKLNIMGLSSPDSAILSAVIFNALIIIALVPLSLKGVQYRPVSADKMLRRNLTIYGIGGLIAPFVGIKLIDLLISLIPGIG
bacteria_87663		33816.3	21689.8		0.640695	0.157869		4.94106e-05	0.000239858		Actinobacteria		PFAM Band 7 protein	qmcA	putative protein		MEPVIIVLIILVVLVFIALIKTIQVIPQASAAIVERFGRYTRTLNAGLNIVVPFIDTIRNRIDLREQVVPFPPQPVITQDNLVVNIDTVIYYQVTDARAATYEVASYIQAIEQLTVTTLRNIIGGMDLERTLTSREEINAALRGVLDEATGKWGIRVNRVELKAIEPPTSIQDSMEKQMRADRDKRAAILTAEGIRQSQILTAEGEKQSSILRAEGDAKAAALRAEGEAQAIRTVFESIHAGDPDQKLLAYQYLQMLPKIAAGDANKLWIIPSELNDALKGLGGIVNLPGAPGNGTHDAPATTPAPRRESPPFDKD
bacteria_24680		58199	37314.1		0.641275	0.213564		0.00267562	0.00740806		Actinobacteria				hypothetical protein		MADAHHDAARHHQRRGREAELLGAEQRRDDDVTAGLELAVGLHDDPVAQPVGQQRLLRLGQAELPRTARVLDGRQRRSARPAVVTGDEHDVGVRLGHAGRDRADADLGHELHVDARVRVGVLQVVDQLRQVLDRVDVVVRRGRDEPHARRREPRLRDPRVHLRAGQLPTFAGLRALRHLDLDVVGVDEVLARDAEPSTGDLLDRTAAFRVVEPLGVFAALAGVGPAAEPVHRDGQGFVCLGRNRAVRHRARVEALEDRFGGLDLVERDRLADAASEGEQAAQRAALAVEAVDLFGVLAVHLFAAGLGRVLQQEHRLRREQVQLALAAVGGMFPTLKLHFSTTRAYLVK
bacteria_292049		22615.6	14493.9		0.641853	0.179786		0.000356858	0.00135869		Actinobacteria	ko:K09811,ko:K09812	cell division ATP-binding protein FtsE	ftsE	Cell division ATP-binding protein FtsE		MVRGVSVIRFDSVSKVYPKQNHPALRDVTLEVEKGEFVFLVGSSGSGKSTFLRLILREERASHGQVHVLGKDLARLSNWKVPQMRRQLGTVFQDFRLLPNKTVAENVAFAQEVIGKSKGEIRKSVPQVLDLVGLGGKEERMPGELSGGEQQRVAIARAFVNRPKLLIADEPTGNLDPQTSVGIMKLLDRINRTGTTVVMATHDQNIVDQMRKRVIELEKGRLVRDQARGVYGYQH
bacteria_347451		26689.3	17101.4		0.642158	0.152097		2.42122e-05	0.000127065		Actinobacteria				hypothetical protein		MLDLGAQPLHVHVDQACVGRVPVAPHLFEQDLAGEDLPGLAGQADEEVELQRRQVDRVAAASHRVPGHVDREIADGQRLLRGGVEATDPGPDPGDELLGLERLDDVVVGAGLEPHHDVDGVALGGEHHDRHAGLGADLLAHVDAVLAGQHQVQEDQVGAVVA
bacteria_289580		23602.8	15103.7		0.644106	0.162363		7.27612e-05	0.000336392		Actinobacteria	ko:K00989,ko:K02428	Phosphorolytic exoribonuclease that removes nucleotide residues following the -CCA terminus of tRNA and adds nucleotides to the ends of RNA molecules by using nucleoside diphosphates as substrates	rph	Ribonuclease PH		MSRFDGRTPDQLRPVTIERGWSKHAEGSVLVSFGDTRVLCTASATQGVPRWRKGSGEGWVTAEYSMLPRATNTRGDRESVRGKIGGRTHEISRLIGRSLRAVIDYKALGENTVVLDCDVLQADGGTRTAAITGAYVALADAVTWMQNNHFIKARSRPLTGTVAAVSVGIVGGVPLLDLAYEEDVKAETDMNVVCTGDGRFVEVQGTAEGQPFDRAELDALLALAVNGCTELTAAQQAALAATEG
bacteria_49719		30605	19566.3		0.645354	0.187646		0.00058343	0.0020662		Actinobacteria	ko:K07033,ko:K09014	assembly protein sufB	sufB	hypothetical protein		MSGFSAPTRSEVQLGNAGVYNLVAKRAKAEEGATMEWVDGNIGSKVTMKYPAVYLMGEHAKGETLSIAFAGEGQHQDAGAKMVHMAPNTSSNIVSKSVARGGGRTSYRGLIEIGEGSKGAKSNVLCDALLVDTISRSDTYPYVDVREDDVSMGHEATVSKVSEDQLFYLMSRGMTEFEAMAMIVRGFVEPIARELPMEYALELNRLIELQMEGSVG
bacteria_128753		33388	21333		0.646221	0.171343		0.00016227	0.00068107		Actinobacteria	ko:K00053	Involved in the biosynthesis of branched-chain amino acids (BCAA). Catalyzes an alkyl-migration followed by a ketol- acid reduction of (S)-2-acetolactate (S2AL) to yield (R)-2,3- dihydroxy-isovalerate. In the isomerase reaction, S2AL is rearranged via a Mg-dependent methyl migration to produce 3- hydroxy-3-methyl-2-ketobutyrate (HMKB). In the reductase reaction, this 2-ketoacid undergoes a metal-…	ilvC	Ketol-acid reductoisomerase (NADP(+))		MAELFYEDDADLSIIQGRKVAVIGYGSQGHAHALSLRDSGVDVRVGLQEGSKSKVKAEEQGLRVVSVAEAAAAADLIMILTPDPIQARVYEESIKDNLKDGDAIFFGHGLNIRYGFIKPPAGVDVCMVAPKGPGHLVRRQYEEGRGVPCIVAVEQDATGNGFALALSYAKGIGGTRAGVIKTTFTEETETDLFGEQAVLCGGTAALVKAGFETLTEAGYQPEIAYFECLHELKLIVDLMYEGGLEKMRWSISETAEWGDYVTGPRIITDATKAEMKKVLAEIQVHLRP
bacteria_48380		38498.1	24531.1		0.650158	0.132433		9.13944e-07	6.81879e-06		Actinobacteria	ko:K03924	associated with various cellular activities	yeaC	hypothetical protein		MTTYDDRASLTDLTATVERVRSSVEGVIEGKPEVVQLSLTVLLAEGHLLIEDVPGVGKTMLAKALAKSIDCSVRRIQFTPDLLPSDITGVSIWDQQRRDFEFKPGAIFSQIVIGDEINRASPKTQSALLESLEERQVTIDGQTYELPSPFMVVATQNPVEMEGTYPLPEAQRDRFMARVSIGYPSAEAELQMLDVHGGVSPLDDLQPVAHAHEIVKLIDAVRSVHVADSVRRYAVDLVAATRVHPDLRLGASPRATLHLVRAARATAALGGRDYALPDDVQNLAVAVLAHRLLPTAQAQLNRRTAEQVVEDIIQRTSVPATPQQHGYGLGNGTQAYGRQQPRRL
bacteria_296721		15577.1	9903.84		0.653315	0.148272		1.05205e-05	6.04152e-05		Actinobacteria		Gas vesicles are small, hollow, gas filled protein structures that are found in several microbial planktonic microorganisms. They allow the positioning of the organism at the favorable depth for growth	gvpJ	Gas vesicle structural protein		MSMPSRLPEPYGQGSGANLADILERVLDKGIVIAGDIRINLLDIELLTIKLRLIVASVDKAKEMGIDWWEDDPALSSGARRKELARENAELRERLARLEELEEGSARGKARGKARRNVREESP
bacteria_201134		29812.7	18883.9		0.658756	0.185507		0.00038362	0.00144594		Actinobacteria	ko:K01784	epimerase dehydratase		UDP-glucose 4-epimerase		MSSVRGKKILVTGGAGTIGSNLVDLLAEGGAREIVVLDNFVRGRRANLARALPSGVVEVVEGDVRDAETVRKVTEGADLVFHLAAIRITQCAEEPRLANEVLVNGTFNVLEAAAEAGVAKVIASSSASVYGMAETFPTTERHHAYNNDTFYGAAKAFNEGMLRSFHAMYGLDYVALRYFNVYGPRMDIHGLYTEVLIRWMERIEAGEPPLILGDGTQTMDFVDVRDIARANVLAAESDLTDEVFNIASGTETSLKELAEGLLEAMGAQGLEPEHGPARAVNGVTRRLADTSHAAERLGFTAQIDLRTGLRDLVEWWRAEREAAK
bacteria_271128		23004.2	14525.1		0.663361	0.160583		3.61273e-05	0.000181201		Actinobacteria	ko:K01966	Acetyl-CoA carboxylase, carboxyltransferase component subunits alpha and beta	pccB	putative propionyl-CoA carboxylase beta chain 5		MHTVIEHILDDAEFFETQALFAPNILTGFGRVEGHPVGIVANQPMQFAGCLDITASEKAARFVRTCDAFNVPVITFVDVPGFLPGVDQEHDGIIRRGAKLIYAYAEATVPLITVITRKAFGGAYDVMGSKHLGADLNLAWPTAQIAVMGAQGAVNILHRRTIAEAEANGEDLDVVRARLIREYEDHLLNPYIAAERGYVDAVILPSDTRRHVVRGLRQLRTKRESLPPKKHGNIPL
bacteria_272846		45752.6	28706.9		0.672439	0.273007		0.0137749	0.0274194		Actinobacteria	ko:K00104	PFAM FAD linked oxidase domain protein		putative FAD-linked oxidoreductase		MRECAAQGVPVVPRGAGTGLSGGANATDGCLVLDLSRMNRIIEIDPDNLLAVVQPGVVNDDLKKAVAALGLWYPPDPASSPWSTIGGNVATNAGGLCCLKYGVTRDYVLGLEVVMGGPVEYGTAVKLGRRTNKGVAGYDLTSLLVGSEGTLGVVTEVTLRLRPAPRPADTVVGAFASLVDAGQAVALGTSRGLQPAALELIDRACLQAVEDWKHLGIEPDTEALLLARAETPEDAGGLVTAFTDAGAVWTERSTDSAEAEALFAARRLTYPALERLGPLLTEDVCVPRSAVPVMLARIEEIGAKHGVRIATIAHAGDGNLHPLLITPPGDDNARIAAQAAFEDIITEALALGGTVTGEHGVGLLKRDGMIRELGPDVCSVQQSIKNTLDPLNLFNPGKA
bacteria_189182		135782	85167.9		0.672902	0.128313		1.56946e-07	1.41203e-06		Actinobacteria	ko:K00265,ko:K00284	Glutamate synthase	gltB	Glutamate synthase [NADPH] large chain		MRGWQAVDRVGLAVPPGDLLGDGVGIDVVAKEVAARHAKAYPASGIAPAHRALEIGGEYQWRREGEPHLFDPETVFRLQHSTRTARYDIFKQYTDRVNEQSERLMTLRGLFGLKSDRPSISVDEVESVSEIVKRFSTGAMSYGSISQEAHETLAIAMNQLGGKSNTGEGGEDPERLYDPARRSSIKQVASGRFGVTSEYLVNADDIQIKMAQGAKPGEGGQLPGHKVYPWVAKTRHSTPGVGLISPPPHHDIYSIEDLAQLIHDLKNANPQARIHVKLVSEVGVGTVAAGVSKAHADVVLISGHDGGTGASPLTSLKHAGGPWELGLAETQQTLLLNGLRDRIVVQTDGQLKTGRDVVIAALLGAEEFGFATAPLVVSGCVMMRVCHLDTCPVGIATQN…
bacteria_337592		66722.7	41655.8		0.679647	0.155169		1.1865e-05	6.73914e-05		Actinobacteria	ko:K03657	DNA helicase	pcrA	ATP-dependent DNA helicase UvrD1		MALVCRDLDLDPKRFPPKSFSAKISNLKNELIDEEDFAAQASDGFEKTLAQAYAMYQSRLREANALDFDDLIMTTVNLLRAFPDVAEYYRRRFRHVLVDEYQDTNHAQYALVRELVGTAEHPVDVPPSEYDLRPAELCVVGDADQSIYAFRGATIRNILQFEEDYADATTILLEQNYRSTQTILSAANAVIERNESRRPKNLWTNAGAGARITGYVADTEHDEAQFVADEIDRLTDAGDAKAGDVAVFYRTNAQSRVFEEIFIRVGLPYKVVGGVRFYERKEVRDVLAYLRVLANPEDSVPLRRILNVPKRGIGDRAEAMIDALSQREKISFPQALKRVDEAYGMASRSTNAVKRFNTLMEDLRTIVESGAGPATVLEAVLERTGYLAELQASTDPQDE…
bacteria_117256		12748.4	7939.75		0.683169	0.177451		0.000118162	0.000512049		Actinobacteria	ko:K02914	Belongs to the bacterial ribosomal protein bL34 family	rpmH	hypothetical protein		MTARRRPAGHDLSWSPRVSKRTFQPNNRRRAKTHGFRLRMRTRAGRAILATRRGKGRARLSA
bacteria_180365		43710.8	27222.7		0.683177	0.163849		3.05198e-05	0.000155638		Actinobacteria	ko:K06994,ko:K07003	Drug exporters of the RND superfamily		Heme uptake protein MmpL11		MPAIATFEGMGLASLMVVAVAMVGSVTVLPALLSLLGERVEKGRIPFLRKAMERRAARTGGESRFWTAVLRGVLAKPLVSVLVASGVLLAIAAPAVGMKTQNLTLDQEFGDRLPIVQTYNRVNDAFPGGSEPAEVVVKAKDINAPEVKSALADFKERAISSGASRGPVEIKLHDAQNIAYLYVPLVGGSDLDKAGASLEKLRDDVRPATLGKVDGVEAPITGQVAGSHDFNAQLGGAVVPVFAFVVIFAFLLMLLSFRSLTVAITSIVLNLLSVGAAYGILVAVFQHGWGASLVGAEGVGAIITWLPLFLFVILFGLSMDYHVFVVSRIREAHLRGRSTKDAIQHGVVTTAGVVTSAAVIMVAVFAIFGTLSMQSMKQMGVGLAAAVLIDATIIRGVLL…
bacteria_173164		16810.8	10462.4		0.68418	0.141646		1.36395e-06	9.79719e-06		Actinobacteria	ko:K03705	Negative regulator of class I heat shock genes (grpE- dnaK-dnaJ and groELS operons). Prevents heat-shock induction of these operons	hrcA	Heat-inducible transcription repressor HrcA		MLSERRLQVLRAIVQDYVGTEEPVGSKALTERHNLGVSPATVRNDMAALEDEGYIAQPHTSAGRIPTDKGYRLFVDKLAGVKPMTGPERRAIQNFLDGAVDLDYVVARTVRLLAQLTRQVAVVQYPSLTRSTVRHVELLSLAPARLMLVLITDTGRV
bacteria_226141		33889.3	21090		0.684304	0.144078		2.03888e-06	1.39965e-05		Actinobacteria				hypothetical protein		MHGVELERRLAVEVLAREHLPDRLRRHLAALGVGALLDHAAELDLRAARQVELVLGLEDVGHTALARLAVDPDHGLVGPAHVVRVDRQVRRLPRQLLHGDALLGRQPLEVLEALLDGVLVGAREGRVDEVAGVRVPRVDGQLGAVLDRAADLVDVGEVDLWVDALAEQVHPQRDQVHVARPLTVAEQAALDPVRAGHQGQLGGGHRRSAVVVRVQADRAVLAPGQVAAEPLDLVGVHVRGGHLDGGRQVQDDLPALGGLPDVGDRLAHLQRELQLGAGEDLRAVLVAELAVAQDLVGVLHHRLGAPYCDVAALGLVDVEHHPAEQRRGRVVQVDGGLRRPLQRLHGPLDQLVARLGQHRDGDVVGDRVTLDQAADEVEVVLAGAGETDLDLLSCSRLPA…
bacteria_134406		46387.5	28850.3		0.68514	0.172732		7.2942e-05	0.000337051		Actinobacteria	ko:K03553	Can catalyze the hydrolysis of ATP in the presence of single-stranded DNA, the ATP-dependent uptake of single-stranded DNA by duplex DNA, and the ATP-dependent hybridization of homologous single-stranded DNAs. It interacts with LexA causing its activation and leading to its autocatalytic cleavage	recA	Protein RecA		MGDSHVGLQARLMSQALRKITSALNQSKTTAIFINQLREKIGVMFGSPETTTGGRALKFYASVRLDIRRNETLKDGTDAVGNRTRVKVVKNKVAPPFKQAEFDILYGQGISREGGLIDMGVENGFVRKAGAWYTYEGDQLGQGKENARNFLKDNPDLANEIEKKIKEKLGVGVRPEEPAAEPGADAAVAAGTPVADPAKAVPAPAAKAAKTKAAAAKS
bacteria_269622		28021.9	17368.8		0.690035	0.17499		8.03778e-05	0.000367756		Actinobacteria		bifunctional deaminase-reductase domain protein		putative protein YyaP		MRSVTYSMSVSLDGYIVGPDGGFDWTAPDEEVFRFATDEVREVGVHLLGRRLYETMLYWETADQNPSLDFSTLEFAAIWKPLPKVVFSTTLSAVQGNARLASGGLAEEIERLRAEPGDGDIAIGGATLAAEAAALGLIDEYRARVYPVLVGGGIPFFPRHERRVDLELAETRTFSSGVVYLRYRVAR
bacteria_120969		43101.7	26603.5		0.696095	0.134417		2.23514e-07	1.91723e-06		Actinobacteria	ko:K01858	myo-inositol-1-phosphate synthase	ino1	Inositol-3-phosphate synthase		MSSVRVAIVGVGNCAASLVQGVEYYKDADPQSRVPGLMHVQFGEYRVRDVEFVAAFDVDAKKVGFDLAEAIGASENNTIKICDVPPTGVTVQRGHTLDGLGKYYLETIEQSDEAPVDVVQVLKDRQVDVLVCYLPVGSEDAAKFYAQCAIDAKVAFVNALPVFIAGTKEWADKFTEAGVPIVGDDIKSQVGATITHRVMAKLFEDRGVLLERTMQLNVGGNMDFKNMLERERLESKKISKTQAVTSQIPDRDLGAKNVHIGPSDYVQWLDDRKWAYVRLEGRAFGDVPLNLEYKLEVWDSPNSAGVIIDAVRAAKIAKDRGIGGPILSASSYFMKSPPVQYFDDEAQANVEKFIKGGDFMK
bacteria_248840		16278.8	10016.5		0.700579	0.203459		0.000574574	0.00204239		Actinobacteria	ko:K02032,ko:K10823	Belongs to the ABC transporter superfamily	appF	Glutathione import ATP-binding protein GsiA		MTNPGQSGSAVLAKDAAPGETLLKVTGLQKHFPIRKGLLQRQVGAVRAVDGIDFEVRSGETLGVVGESGCGKSTMGRLITRLLEPTAGTVEFEGKDITHLGVNGMRPLRRDVQMIFQDPYSSLNPRHTIGTIVMLRVYCSWPGVSATMKERRRVAKYR
bacteria_306802		8537.2	5252.07		0.700778	0.127707		4.07969e-08	4.21568e-07		Actinobacteria	ko:K07727	transcriptional regulator		hypothetical protein		MPIAVDIDVMLARRKMSVGDLANRVGITPANLAVLKNGRAKAVRFATLAALCEVLECQPGDLLRWEAEDAAGE
bacteria_125990		27960.2	17189.6		0.701815	0.151596		3.66514e-06	2.37663e-05		Actinobacteria		ATPase associated with various cellular activities	coxD	hypothetical protein		MNGSVNGPEEVRARLEETGYLVDDGLAVACFLALRLHRPLFCEGDAGVGKTALAAALAEALGAPLIRLQCHEGIDASQALYDWDFPRQLLHLRAAEAAGAVDADRLEGELYDRRFLIARPLLRALETCPSVLLIDEIDRADDEFEAFLLELLSEFSVTIPELGTVRARVPPVVVLTSNRTREVHDALKRRCLYHWFDHPDFARELAIVRRRLPGVSQRLAEQVTALVQTLRSEDLLKPPGVAETIDWAEALDALGASEVDAELAVATLGSVLKYREDAERARGLLPAALQGA
bacteria_359490		32139.1	19681.9		0.707443	0.240439		0.00325789	0.00871301		Actinobacteria				hypothetical protein		MQHREWRLEHAERGVLEVLGQLGELELEAQVRLVRAVLRHRVGVGDPAERQRQLDALGLLPDRGQQLLGQRDDVVLLDEAHLDVELGELRLPVGAEVLVAVAARDLVVALQATDHQQLLEQLRRLRQRVPGAGTQARRHQEVTRALGRGAGQRRRLDLDELLAVQDLARDPADLAAQPDGLGRAGAAQVQVAVLEAGLFPDLALALDLERQRRRLVEDLELGHVDLDRTGREVRVLAALRPLAHVASDLDDVLAAQPVRALGHLALAEHDLGHPGRVAQVDEDDTAVITPASDPPGEGDGLPGVLGPE
bacteria_240475		14591.2	8933.07		0.707832	0.174197		4.83616e-05	0.000235348		Actinobacteria				hypothetical protein		MPTTEISVSGKVRHIRPLPSDSTTTRVPVSATMKLAPETPTLARRNFSRRWSRAASASSAGVSVRPSGAGRPHSLISRAKMSRISPRLRWMAGTRMCEGRSLPNCTISSARSVS
bacteria_345020		14029.3	8563.36		0.712103	0.207951		0.000616223	0.00216088		Actinobacteria	ko:K02874	Binds to 23S rRNA. Forms part of two intersubunit bridges in the 70S ribosome	rplN	50S ribosomal protein L14		MKKGDVVKAVIVRTVKERRRPDGSYIRFDENAAVILKNDGDPRGTRIFGPVGRELREKKFMKIISLAPEVL
bacteria_130245		18898.7	11505		0.715999	0.15667		4.87506e-06	3.04497e-05		Actinobacteria	ko:K02028	ABC transporter, ATP-binding protein	atrC	L-cystine import ATP-binding protein TcyC		MVFQRFNLFPHMTAAENVMEAPVQVKGAGRTKARERARELLEKVGLADKAGSYPAQLSGGQQQRVAIARALAMDPKLMLFDEPTSALDPELVGDVLDVMRDLAESGMTMIVVTHEMGFAREVGDSLVFMDGGVVVESGDPREVLTNPQHERTQAFLSKVL
bacteria_90807		28178.5	17102		0.720446	0.128514		2.07069e-08	2.28825e-07		Actinobacteria	ko:K02112	Produces ATP from ADP in the presence of a proton gradient across the membrane. The catalytic sites are hosted primarily by the beta subunits	atpD	ATP synthase subunit beta		MTTTVEPTTATGRVARVIGPVVDVEFPVDAIPNMYNALHVEVDNPDGTGIKVLTLEVAQHLGDGLVRGISMQPTDGLVRGATVTDTGSAISVPVGQITKGKVFNALGEVLNVDKDEFEKQVEVRWPIHRKAPNFSELESKTEMFETGIKVIDLLTPYVTGGKIGLFGGAGVGKTVLIQEMIYRVAENFGGVSVFAGVGERTREGNDLIHEMVDSGVLDKTALVFGQMDEPPGTRLRVALSALTMAEYFRDVQKQAPAHGAGKHR
bacteria_47999		16637.6	10059.5		0.72586	0.238904		0.00237922	0.00673406		Actinobacteria		Transcriptional regulator		Putative HTH-type transcriptional regulator		MLPAAGAQPGEIESAPAVRLLRDRASAVRKDLAVDADAVATMVRVCRALDGMPLAIELAAARLRTMSLDQLAHRLDDRFRLLTGGSRTALPRHRTLRAVVDWSWELLTDAERMVLRRLSVFAGGASLEAAERVCAAPPVRRR
bacteria_265262		58052.7	34872.5		0.73526	0.185453		7.34969e-05	0.000338641		Actinobacteria	ko:K03043	DNA-dependent RNA polymerase catalyzes the transcription of DNA into RNA using the four ribonucleoside triphosphates as substrates	rpoB	DNA-directed RNA polymerase subunit beta		MRATLEKDHTQGQDDALLDIYRKLRPGEPPTREAAQTLLENLYFNSKRYDLAKVGRYKVNKKLGGEAPLDAGVLTVEDILSSIKYLVKLHAGETETVGNNGTSIVVETDDIDHFGNRRLRTVGELIQNQIRVGLSRMERVVRERMTTQDVEAITPQTLINIRPVVAAIKEFFGTSQLSQFMDQNNPLSGLTHKRRLSALGPGGLSRERAGLEVRDVHSSHYGRMCPIETPEGPNIGLIGSLASYGRVNAFGFVETPYRKVVEGVVTDDVDYLTADEEDRFVIAQANAILSEDMRFEESRVLVRRRGGEIDYIPGDDVDYMDVSPRQMVSVATAMIPFLEHDDANRALMGANMMRQAVPLITAEAPLVGTGMEYRCAVDAGDVIKAEKAGVVQEVSADYV…
bacteria_218199		8814.45	5291.13		0.736164	0.168919		1.31201e-05	7.36441e-05		Actinobacteria	ko:K18955	Acts as a transcriptional regulator. Probably redox- responsive. The apo- but not holo-form probably binds DNA	whiB2	Transcriptional regulator WhiB		MTELVQQLLVDDADADEELGWQERALCAQTDPESFFPEKGGSTREAKKVCLSCEVRSECLEYALANDERFGIWGGLSERERRRLKKAAV
bacteria_04424		53916	32304.4		0.738993	0.115115		1.36621e-10	2.75268e-09		Actinobacteria	ko:K01214	Belongs to the glycosyl hydrolase 13 family	glgX	Glycogen operon protein GlgX		MVYNHTAEGNHLGPTLSFRGLDNASYYRLADDPRYYMDTTGTGNSLLMRSPHVLQLIMDSLRYWVTDMHVDGFRFDLAATLARQFHEVDRLSSFFDLVQQDPVVSQVKLIAEPWDVGEGGYQVGNFPPLWTEWNGKYRDTVRDMWRGEPRTLAEFASRLTGSSDLYQDDGRRPLASINFVTCHDGFTLHDLVSYNDKHNNANGEDNRDGESHNRSWNCGAEGETDDEDVRALRARQMRNFIATLMLSQGVPMLSHGDEFARSQGGNNNAYCQDSELAWVPWPEDGGELLAFTRAMVWLRRDHPVFRRRRFFHGRPVEGTHDELSDIAWFTPEGKEMTQRDWDSAQARALSVFLNGNAISEPGPRGERIADDSFLLMFNASPRPLEFVVPVDHGRQWQVV…
bacteria_373632		29594.2	17693.2		0.742124	0.156662		2.16803e-06	1.48083e-05		Actinobacteria	ko:K02032,ko:K10823	Belongs to the ABC transporter superfamily	appF	Oligopeptide transport ATP-binding protein OppF		MSETKKTDADVTAAPDEREILLKVEGLQKHFPIRKGVLQRQVGAVKAVDGIDFEVRKGETLGVVGESGCGKSTMGRVITRLQEPTGGSIHFEGQDITRLNAAGMRPLRRDIQMIFQDPYGSLNPRHTIGGIVSAPFRLQGVEPEGGVKKEVQRLLELVGLSPEHYNRYPHEFSGGQRQRIGIARALALKPKLVVADEPVSALDVSIQAQVVNLMDDLQQELGLTYVIIAHDLSVVRHVSDRIAVMYLGKIVELADRTALYEAPMHPYTKALMSAVPVPDPKRRGAN
bacteria_314028		36180.5	21591.6		0.744753	0.193393		0.000117644	0.000510628		Actinobacteria	ko:K03432	Component of the proteasome core, a large protease complex with broad specificity involved in protein degradation	prcA	Proteasome subunit alpha		MSTPFYVSPQQAMADRAEYARKGIARGRSLVVLQYADGIVFVGENPSRALHKFSEIYDRIGFAAAGKYNEYENLRIGGVRYADLRGYTYDRDDVTARGLANVYAQTLGTIFSSAAEKPYEVELVVAEVGDTPEGDQIYRLPHDGSIVDEHGSVAVGGNAEQISSYLDEQHQDGMSLAEALKLAVKSLSREPNGGQREIPAERLEVAILDRTRPQQRKFKRIVGRQLARLLEANGASTATEAEDSADEE
bacteria_23382		40044.8	23839		0.748275	0.156917		1.85506e-06	1.28899e-05		Actinobacteria	ko:K03070	Part of the Sec protein translocase complex. Interacts with the SecYEG preprotein conducting channel. Has a central role in coupling the hydrolysis of ATP to the transfer of proteins into and across the cell membrane, serving as an ATP-driven molecular motor driving the stepwise translocation of polypeptide chains across the membrane	secA	Protein translocase subunit SecA		MSVLSKIMRAGEGKILRKLHRIADQVASIEEDFVDLSDAELRALTDEYKQRYADGESLDDLLPEAFATVREAAKRVLGQRHYDVQMMGGAALHLGYVAEMKTGEGKTLVGTLPAYLNALSGGGVHLITVNDYLAERDSEMMGRVHKFLGLEVGCILANMTPAQRREQYACDITYGTNNEFGFDYLRDNMAWSQDELVQRGHNFAIVDEVDSILVDEARTPLIISGPADQATKWYGDFAKLVTRLK
bacteria_211784		39207.1	23336.1		0.748538	0.163076		4.42994e-06	2.80865e-05		Actinobacteria				hypothetical protein		MRSKRAGAIVRLRGVRTAAATTGRSRGAGRSGSTLGLGLGVGLAGLDDLSLVLLEALLRLGVLGLPDLALSLEALEPVVGLGVEALGVDVVARVVVRGSHAVQGRVELGRGGVATEGLVRLLQRQADPATLEVDVDDLDEDLVADLDNLLRDLHVALGQLGDVDQALDALVDAHERTERNELGDLTGDDLTDLVRPGELLPRVLLGRLQRQGDALAVHVNVENLDGDLLADLDNLGRVVDVLPGQLGDVHQAVDATQVHEGTEVDDRGDDAGAHLALLQGGEEGLTDLALGLLQPGTAGQDHVVAVLVQLDDLGLELLAHVGLELAVSQFRSQQKHENELGGMK
bacteria_146568		12464.6	7408.86		0.750453	0.176819		2.19393e-05	0.000116592		Actinobacteria	ko:K02935	Forms part of the ribosomal stalk which helps the ribosome interact with GTP-bound translation factors. Is thus essential for accurate translation	rplL	50S ribosomal protein L7/L12		MTLIELSEFVKAFEEKFDVTAAAAVAAAPAGPAAVAEAPEEQDEFDVILTGAGEKKIQVIKVVRELTSLGLKEAKDLVDGAPKPVLEKVAKDAAEKAAESLKGAGASVEVK
bacteria_327941		12502.7	7431.01		0.750592	0.15329		9.75365e-07	7.23539e-06		Actinobacteria	ko:K03782	Bifunctional enzyme with both catalase and broad- spectrum peroxidase activity	katG	Catalase-peroxidase		MANPLGAEFDYAEAFQALDLAAVKQDIAEVLTTSQDWWPADFGNYGPLMIRMAWHSAGTYRISDGRGGAGAGQQRFASC
bacteria_198234		20796.9	12351.1		0.751707	0.166803		6.58888e-06	3.97628e-05		Actinobacteria	ko:K01847	Methylmalonyl-CoA mutase	mutB	putative methylmalonyl-CoA mutase large subunit		MALAIAAARAKATVGEISDALEKVYGRHASQIRTISGVYRNEAGESPNVDRTRALVDVFDEAEGRRPRILVAKMGQDGHDRGQKVIATAFADLGFDVDVGPLFQTPGEVARQAVEADVHIVGVSSLAAGHLTLVPALREALAEEGREDIMIVVGGVIPPQDVPTLLEMGAAAVFPPGTVIPDAAYDLVERLSADLGHGQ
bacteria_347986		22575.8	13406.8		0.751795	0.180344		3.0637e-05	0.00015619		Actinobacteria	ko:K01880	Catalyzes the attachment of glycine to tRNA(Gly)	glyQS	Glycine--tRNA ligase		MTRTRSSSSFQFGGNEWGELEGVANRTDYDLTAHSKASGQDLSFFDQEAGERWTPYVIEPAAGVGRAMLAFLLDAYVEDEAPNAKGKLEKRTVLRLDHRLAPVKVAVLPLSRNPELSPKAKGLAAALRQNWNIEFDDAGAIGRRYRRQDEIGTPFCVTVDFDTLEDNAVTVRERDSMKQERVSLDQIEGYLAARLIGA
bacteria_304492		32415.6	19184		0.75677	0.155513		1.13727e-06	8.29026e-06		Actinobacteria	ko:K03168	Releases the supercoiling and torsional tension of DNA, which is introduced during the DNA replication and transcription, by transiently cleaving and rejoining one strand of the DNA duplex. Introduces a single-strand break via transesterification at a target site in duplex DNA. The scissile phosphodiester is attacked by the catalytic tyrosine of the enzyme, resulting in the formation of a DNA-(5'…	topA	DNA topoisomerase 1		MPRDGLALKDLLKDSDELFLATDEDREGEAIAWHLQEVLKPKVPVKRMVFHEITKAAIQAAVANPRELNQKLVDAQETRRILDRLYGYEVSPVLWKKVMPKLSAGRVQSVATRLVVERERERIAFRSAEYWDLVGTFSTGRAGDASDPSTLNARLTTVDGRRVAQGRDFDASTGQLKSGAQVLQLDETAARALAAALADTRFSVRGVESKPYRRSPYAPFRTTTLQQEASRKLGFGAKATMQVAQKLYENGFITYMRTDSTTLSETAIRAARAQVTQLYGADYLPEKPRVYAGKVKNAQEAHEAIRPSGDRFRTPAETGLTGDQISS
bacteria_375891		28172.7	16658.7		0.758018	0.162611		3.13862e-06	2.06476e-05		Actinobacteria		transcriptional regulator		HTH-type transcriptional regulator BetI		MTAIEQTEAARPRGTRLPRRARRNQLLGAAQEVFVAQGYHSAAMDDIAERAGVSKPVLYQHFPGKLDLYLALLDQHCEALIESVRAALASTSDNKQRVRATMDAYFAYVEDDGGAFRLVFESDLTNEPAVRARVDKVTNECAEAICEVIAEDTGLSRPESMLLASGLGGLSQVVARSWLHSDRSVPRDQAVQLLASLAWRGIAGFPLHGTEHH
bacteria_59764		17545.8	10360		0.760082	0.153909		7.87147e-07	5.9567e-06		Actinobacteria	ko:K00626,ko:K00632	Belongs to the thiolase family	fadA	Acetyl-CoA acetyltransferase		MAGLKPVFRPDGRVTAGNCCPLNDGAAAVVIMSDTKARELGLTPLARIVSTGVSGLSPEIMGLGPVDASNQALRRAGLTIDDIDLVEINEAFAAQVIPSYRDLGIDPDKLNVNGGAIAVGHPFGMTGARITGTLINSLQFHDKQFGLETMCVGGGQGMAMVIERLS
bacteria_194127		33321.2	19661.7		0.761029	0.152126		5.65514e-07	4.43132e-06		Actinobacteria	ko:K02028	ABC transporter, ATP-binding protein	atrC	Glutamine transport ATP-binding protein GlnQ		MTAMVKAEGVHKSFGLVEVLKGIDLEVKNGEVFCLIGPSGSGKSTFLRCINHLEQINAGRLYVDGDLVGYRQKGDKLYELKDSEVALKRRDIGMVFQRFNLFPHMTAAENVIEAPVQVKGVGKAQAKERARELLDRVGLADKAGSYPSQLSGGQQQRVAIARALAMDPKLMLFDEPTSALDPELVGDVLDVMRDLAESGMTMVVVTHEMGFAREVGDSLVFMDGGVVVESGNPRDVLTNPQHERTQAFLSKVL
bacteria_118635		15497.1	9123.87		0.764265	0.240145		0.00146002	0.00448671		Actinobacteria	ko:K00134	Belongs to the glyceraldehyde-3-phosphate dehydrogenase family	gap	Glyceraldehyde-3-phosphate dehydrogenase 2		MAKVLLENFGIVSGLMTTVHAYTSDQRLQDFPHKDLRRARAAAENIIPASTGAAKALGLVIPELAGKLNGMAMRVPVPTGSVTDLVVETERVVTKEEVNAAFQKAAEGELKGYLDYTEDAIVSSDIVNWPASCTFDSSLTMVQGNSVKIIGWYDNEWGYSNRLVDLTVFVGNQL
bacteria_373604		24676.1	14499.1		0.767148	0.148636		2.4529e-07	2.08178e-06		Actinobacteria		Short-chain dehydrogenase reductase sdr		Levodione reductase		MTQSTEENICRRLVGRTAVITGAGSGIGLATARRLASEGAHVVCGDVDETRGKAAADEVGGIFVKVDVTDPEQVEALFKTAYDTYGSVDIAFNNAGISPPDDDSILDTGLEAWKRVQEVNLTSVFLCCKAAIPYMRRQGKGSIINTASFVARMGAATSQISYTASKGGVLAMTRELGVQFAREGIRVNALCPGPVNTPLLQELFAKDPERAARRLVHIPVGRFAEADEIAAAVAFLASDDSSFVNATDFLVDGGIAGAYVTPL
bacteria_247233		11666.8	6843.01		0.769694	0.211868		0.000280254	0.00110218		Actinobacteria	ko:K18929	Iron-sulfur cluster binding protein	ykgF	Lactate utilization protein B		MTAAGGVVHWAADAADANRIVTALVQATGEDEVVKVKSMATQEIGLNEALADAGIRAYETDLAELIVQLGGDRPSHILVPAISRRKISRISERPRWMAGTRMCDGRSPPSCTMSSARSVS
bacteria_319529		16581.6	9710.95		0.771904	0.177813		1.41777e-05	7.88792e-05		Actinobacteria	ko:K13628,ko:K15724	Belongs to the HesB IscA family	erpA	Protein		MSVSDEKTTVSDGILLSDAAAAKVKALLDQEGREDLALRVAVQPGGCSGLRYQLFFDERSLDGDVVKDFDGVKVVTDRMSAPYLGGASIDFVDTIEKQGFTIDNPNVTGSCACGDSFS
bacteria_316707		32027.6	18727.3		0.774146	0.154343		5.28297e-07	4.16928e-06		Actinobacteria	ko:K03043	DNA-dependent RNA polymerase catalyzes the transcription of DNA into RNA using the four ribonucleoside triphosphates as substrates	rpoB	DNA-directed RNA polymerase subunit beta		MNPGQVLEIHLGWLAKQGWDVSGVGEEWARRLQVIGADRVAPGTNVATPVFDGAREDEITGLFESTIPNRDGDRVVLPSGKARMFDGRSGEPFPEPIAIGYMYILKLHHLVDDKLHARSTGPYSMITQQPLGGKAQFGGQRFGEMEVWALEAYGAAYALQELLTIKSDDVLGRVKVYEAIVKGENIPEPGIPESFKVLIKEMQSLCLNVEVLSSDGMSIEMRDTDEDVFRAAEELGIDLSRREPNSVEEV
bacteria_34840		22611.3	13202.6		0.776206	0.194141		6.384e-05	0.000299854		Actinobacteria	ko:K02520	IF-3 binds to the 30S ribosomal subunit and shifts the equilibrum between 70S ribosomes and their 50S and 30S subunits in favor of the free subunits, thus enhancing the availability of 30S subunits on which protein synthesis initiation begins	infC	Translation initiation factor IF-3		MPLAKALELAHEYDLDLVEVAANARPPVCKLMDYGKFKYESAMKAREARKNQAHTVIKEMKLRPKIDPHDYDTKKGHVVRFLKQGDKVKITIMFRGREQSRPELGYRLLQRLAEDVQELGFVESNPKQDGRNMIMVLGPHKKKTEAMAEAREAQAARKAERQGHSPAEEPAEEPAEA
bacteria_160414		26386.2	15377.8		0.778874	0.156193		6.14426e-07	4.78068e-06		Actinobacteria	ko:K02313	it binds specifically double-stranded DNA at a 9 bp consensus (dnaA box) 5'-TTATC CA A CA A-3'. DnaA binds to ATP and to acidic phospholipids	dnaA	Chromosomal replication initiator protein DnaA		MDILLVDDIQFLADKESTQEEFFHTFNTLHNANKQIVLSSDRPPKQLVTLEDRLRNRFEWGLITDVQPPELETRIAILRKKAVQEQLNAQPEVLEFIASRISRNIRELEGALIRVTAFASLNRQPVDLGLTEIVLKDLIPGGEDSTPEITAPAIMAATADYFGLTVEDLCGSSRGRQLVTARQIAMYLCRELTDLSLPKIGAQFGGRDHTTVMHADRKIRALMAERRSIYNQVTELTNRIKNG
bacteria_272094		32135.3	18672.4		0.783205	0.159127		8.57128e-07	6.43392e-06		Actinobacteria	ko:K00700	Catalyzes the formation of the alpha-1,6-glucosidic linkages in glycogen by scission of a 1,4-alpha-linked oligosaccharide from growing alpha-1,4-glucan chains and the subsequent attachment of the oligosaccharide to the alpha-1,6 position	glgB	1,4-alpha-glucan branching enzyme GlgB		MHASHHTWHDEDWLSGRALKPAHAAPFSVYEVHLPSWRPGLTYRQLADQLPAYVADLGFTHVELMPVAEHPFGGSWGYQVTGFYAPTARLGTPDDFKYLVDALHRAGIGVLMDWVPAHFPRDDWALAEFDGRPLYEHEDPLRAAHPDWGTLEFDYGRREVRNFLVANAVYWCEEFHIDGLRVDAVASMLYLDYSREPGQWAPNEHGGRENLDAVAFLQEMNATVYRRNPGVITIAEESTAWDGVTRPTDDGGLGFGMKWNMGWMHDSLVYASKDPVHRKYHHNEMTFSMVYAYSENYVLPISHDEVVHGKQSLEMGRT
bacteria_60551		42701.3	24786.2		0.784736	0.166707		2.51048e-06	1.68927e-05		Actinobacteria	ko:K03798	Acts as a processive, ATP-dependent zinc metallopeptidase for both cytoplasmic and membrane proteins. Plays a role in the quality control of integral membrane proteins	ftsH	ATP-dependent zinc metalloprotease FtsH		MRDLFEQAKNAAPAIVFVDEIDAVGRQRGAGLGGSHDEREQTLNQILVEMDGFDSQTNIIVVAATNRPDVLDPALLRPGRFDRQIAVDRPDMQGRLEILKVHQKGKPVAPDVDLSAVARRTPGFTGADLSNVLNEAALLTARSNQKLIDNNMLDEAIDRVVAGPQKRTRIMSDKEKKITAYHEGGHALVAAASLNSDPVHKITILSRGRALGYTMVLPDEDKYSTTRNEMLDQLAYMLGGRAAEELVFHDPTTGAANDIEKATTTARAMVTQYGMTERLGAIKFGGDNTEPFLGREMSHPRDYSEEVAALVDEEVKKLIETAHNEAWEILVENRDVLDQLVLQLLEKETLNKEQIAEVFAPIVKRPPRPAWTGSSRRTPSTRPPVLSPKELALTNGANG…
bacteria_09269		20073.4	11584.7		0.793039	0.199451		7.00491e-05	0.000324958		Actinobacteria	ko:K01507	Catalyzes the hydrolysis of inorganic pyrophosphate (PPi) forming two phosphate ions	ppa	Inorganic pyrophosphatase		MDHETGRIRLDRRLFTSTAYPTNYGFVENTLGEDGDPLDALVILDEPTFPGCLIKCRAIGMFRMTDEAGGDDKLLCVPATDPRQEHLRDIHHVSEFDRLEIQHFFEVYKDLEPGKSVEGADWVGRVDAEAEIERSYKRFKDSGGH
bacteria_06969		50832.6	29257.2		0.796947	0.203319		8.86634e-05	0.000401199		Actinobacteria	ko:K02601	Participates in transcription elongation, termination and antitermination	nusG	Transcription termination/antitermination protein NusG		MKTNLEQRAVSLNVEDFIFAAEVPQEEVAQIKNGERKTVRQNKLPGYVLVRMDLTNESWGVVRNTPGVTGFVGNAYDPYPLTLDEIVKMLAPEAEEKAARELAEAEGRPAPARKLEVQVLDFEVGDSVTVTDGPFATLQATINEINADSKKVKGLVEIFGRETPVELSFDQIQKNLYVTQLPSRSGRLSRSLPDLLGFTPRHGVPYRGAVAWLLSGTAKTNEDRGPGMPPKKKKVTGLIKLQINAGAANPAPPVGPALGQHGVNIMEFCKAYNAATESQRGWVIPVEITVYEDRSFTFITKTPPAAKMILKAAGVEKGSGEPHKTKVAKITQAQVREIATTKLPDLNANDLDAASKIIAGTARSMGITVEG
bacteria_329654		34083.9	19611.1		0.797437	0.163918		1.14532e-06	8.34547e-06		Actinobacteria				hypothetical protein		MRGAIWAHCAAAIDGEQHVEILDGDVMHELVVAALQERGIDRDDRLRAFACHAGRQRDGVLFGDGDVEVAIRIFLAETHQAGAFAHCRRDRHERRIQRRHIAQPIAEHIGVRRFLGARLGEQALHGIEGRYGVVTDLVAFGEFVTLALGGDDVQQLRTLERLQRLQRRDQRIDVVAVERSGVVEAHFLEQCRRHEHALPVFFPAAHEFGGRLVLVAQQLLAAFAQCIERAAGGHAAEHARHAADVLRNRHAVVVEDDQQVRFRIHSAGMVERFVSHARRHRAVADHRDDLAVVAGARIGDRHAQRGRDRGR
bacteria_307605		7904.2	4546.05		0.797907	0.198296		5.72628e-05	0.000273099		Actinobacteria	ko:K02963,ko:K03111,ko:K15125	Binds as a heterodimer with protein S6 to the central domain of the 16S rRNA, where it helps stabilize the platform of the 30S subunit	rpsR	30S ribosomal protein S18 1		MAKPPARKPKKKVCVFCKDKVNYVDYKDTNLLRKFISDRGKIRARRVTGNCTQHQRDVATAVKNSREMALLPYTSTTR
bacteria_104347		29263	16817.5		0.799113	0.175556		5.31637e-06	3.28807e-05		Actinobacteria				hypothetical protein		MIKDVIADLAAPADVGLGCFQRVLLGVALLNFQFVQLRGQHLHRRVAVGMLAAACLASDHRVGRDVRDADRRLGLVDVLATRARRAIDIGTQVRGIDLDVDVVLDLRRHEHRGETGVAAIVRVERGLADQAMHADLGLEPAVGVIAFHTEGRRLDAGDIAAGHFHQLGLPATRFGPAQVHAQQHFGPVLRFGATRAGLDVDKGRVRIHLPGKHPLEFQRVHAFRVTLDVLGDGIRGFLVVFGFDQIQQFFGARKPFIQVADAVDGLVEQRPLAP
bacteria_73783		10938.5	6271.4		0.802536	0.279117		0.00403689	0.010368		Actinobacteria	ko:K05524	Ferredoxin	fdxA	Ferredoxin		MTYVIAQPCVDVKDKACIEECPVDCIYEGSRSLYIHPDECVDCGACEPVCPVEAIFYEDDTPEEWKDYYKANVEFFDELGSPGGASKLGLIERDHPFIAALPPQNG
bacteria_361058		38764.3	22190.3		0.804823	0.153487		1.57482e-07	1.41542e-06		Actinobacteria		Transposase and inactivated derivatives IS30 family		hypothetical protein		MEFEIRKVRTVAQGRRQLVRERDEYFRLMDQGLSSLEACRRVGINTRTGKRWRNGRNPSGRHKAAPPIKAVAPPPGPSRYLREADRIHIADRLREKATVRTIAAELGRSPSTNSREIRRNRHPGNGQYRPFAAQARADSRRPRPKTGKIGQHPQLRDFIQDHLDIRWSPEQICQALRAQFPRRPEMHVVHETVYQALFVQGRGELRRELAKALRSGRTRRKPRRQAQQRQPRFSTPRVMISERPAEAEDRAVPGHWEGDLIIGKDGASAIGTLVERATRYVVLLHLPHGRTAEHVRDALVETARTLPAHLVRSLTWDQGTEMAAHGSFTLATDIPVYFCDPASPWQRGSNENTNGLLRQYFPKGTDLAVHTRERLDAVAAELNGRPRKTLGWETPAERL…
bacteria_342652		49905.3	28450.9		0.810699	0.168191		1.43471e-06	1.02679e-05		Actinobacteria	ko:K01689	Catalyzes the reversible conversion of 2- phosphoglycerate into phosphoenolpyruvate. It is essential for the degradation of carbohydrates via glycolysis	eno	Enolase		MLDLDATPDKSSLGANAILGVSLAVAHAASEASDLPLFRYLGGPNAHLLPVPMMNILNGGSHADSNVDIQEFMIAPIGAESFSEALRWGTEVYHTLKKVLKAKGLSTGLGDEGGFAPNLGSNREALDLILEAIKEAGYAPGEQIALALDVAASEFYKDGTYQFEGKDRSAAEMTEYYEELVAAYPLVSIEDPLFEDDWAGWKILTDKLGDKVQIVGDDLFVTNPDRLERGIREATANALLVKVNQIGTLTETLEAVELAKRAGYGTVISHRSGETEDTFIADLAVGVNAGQIKTGSLARGERTAKYNQLLRIEEELGSAAVWPGHAVFPGRRLGATVRRCPHPG
bacteria_138199		17375.7	9878.66		0.814659	0.164545		7.38366e-07	5.63095e-06		Actinobacteria		dehydratase		Mesaconyl-CoA hydratase		MQFGRTYEEFEVGAVYKHWPGKTVTEYDDHLFCLLTMNHHPLHMDVNYAENTTDFGKNVVVGNYIYSLLLGMSVPDVSGKAIANLEIESLRHVAPTFHGDTIYGETVVLDKWPSKSKDDRGIVHVETKGYKQDGTLVCVFRRKVMVPTETYIKERGGEQPGRPELKSQEK
bacteria_157178		18362.1	10404.7		0.819437	0.175532		3.03681e-06	2.00375e-05		Actinobacteria	ko:K00281,ko:K00282	The glycine cleavage system catalyzes the degradation of glycine. The P protein binds the alpha-amino group of glycine through its pyridoxal phosphate cofactor	gcvP	putative glycine dehydrogenase (decarboxylating)		MGGEGLKRATQVAVLSANYIAKRLEPHYPVLYTGPGGLVAHECIIDLRPLTKATGVSVDDVAKRLIDYGFHAPTMSFPVAGTLMIEPTESEDLIELDRFCEAMIAIRAEIEKVGAGEWPAEDNPLRGAPHTAAALGGEWKHAYTREEAVFPAGVSAADKYWPPVRRIDQAFGDRNLVCSCPPLDAYEN
bacteria_294874		16131.1	9124.35		0.822102	0.153872		9.154e-08	8.6963e-07		Actinobacteria		lactoylglutathione lyase activity		hypothetical protein		MSSIKQFQVTFDCAQPERVARFWCEVLGYVVPPPPEGFATWDDYNRSLPPERQDAGFVCMDPSGVGPRMYFQRVPEGKVVKNRVHLDVRVGTGLVGEERLATLEAECTRLVALGAVRERLLRADGVNESCIAMQDIEGNEFCLD
bacteria_38090		28471.7	16092.4		0.823179	0.136464		1.61731e-09	2.35985e-08		Actinobacteria				hypothetical protein		MELAGRDVHRERDVGAELQAGLLDRDRDQVERLAVAGQVRREAALVAEAGGQAALLQHRLQRVVDAGALHQGLAVRRRADRGDHELLDVDVAVRVGAAVQDVHHRDRQDMRVRAADVAEQRQAGAVRGRLRHRQADAENGVRAELGLVRGAVEVDQGLVDQPLLVDVVPDDLLVDVLQDRGDRLLDALAAVPGLVAVAQFDGLELAGGRARGHGRPGDGVVVEQNLDLDSGVAARVEDLAGADGLDGGHIDSQVLDDESVPSLASRPPASVDRVGPNDRIRGYFPRQ
bacteria_48005		37108.4	20968.2		0.823521	0.17816		3.79396e-06	2.45027e-05		Actinobacteria	ko:K03727	DEAD DEAH box helicase	helY	putative helicase HelY		MYDFGLDPFQIEACQALEAGKGVLVAAPTGSGKTIVGEFAVHLALQQGKKCFYTTPIKALSNQKYSDLCRRYGSDRVGLLTGDNSVNSDAPVVVMTTEVLRNMLYAGSQTLLGLGYVVMDEVHYLSDRFRGAVWEEVIIHLPESVTLVSLSATVSNAEEFGDWLDTVRGDTEVIVSEHRPVPLFQHVLAGRRMYDLFEEGEGHRRAVNPDLARLARMEASKPSYQDRRRGRNVREADRERERRQRSRVWTPGRPEVIERLDAEGLLPAITFIFSRAACEAAVQQCLHAGLRLNDEESRAEVRALVEERTAAIPHEDLHVLGYYEWLEGLERGIAAHHAGMLPSSHS
bacteria_187206		25618.5	14436.6		0.82741	0.17827		3.46161e-06	2.25791e-05		Actinobacteria				hypothetical protein		MPAGDEPLQLVGGALGGDPAVVEDGDAVGEFVGLFQVLGGEEDGDAVGDQLPDDLPHVVAGARVEAGGGLVEEDDPRLADQGHGDVEAALHAAGVGGGGLLGGLGEVEPFQQFGGDLPSLGLGQVVQVRHEEQVLLAGDEAVDGGELPGDTDRGAHAVRCRGDVVARDLGLPAVGGDERGQDLHGGGLAGAVRSEQREHRPGRDVQVDAVEHDLVAVRLAQTDGGELSGDADRGADPVR
bacteria_371183		17918.8	10086.9		0.828945	0.179387		3.81909e-06	2.4647e-05		Actinobacteria		Protein of unknown function (DUF3145)		hypothetical protein		MHSAPRALCPHVEWAVAGVLGTRVSLDWIRQPAAPGTWRSEFSWKGEAGTASKLASALRGWQMLRFEVTAEPCATAEGERYSCTPDLGIFHAVTGIHGDILIPEDRLRAALLRSRRGETDLEAELAKLLGKPWDDELESFRHAGEGATVRWLHQVV
bacteria_292062		51470.7	28957.4		0.829817	0.138945		2.33997e-09	3.2946e-08		Actinobacteria	ko:K18929	Iron-sulfur cluster binding protein	ykgF	Lactate utilization protein B		MISGAKFAVAETGTLAVVESEGNGRMCLTLPETLISVVGIEKVVPTWQDLEVFLQTLPRSSTAERMNPYTSMWTGTRDGRAGEGDGPQNFHLVLLDNGRSDTLADEVGRQALRCIRCSACLNVCPVYERAGGHAYGSVYPGPIGAILSPQLRGTASEIDASLPYASSLCGACYEVCPVAIDIPEVLVHLRERIVEGGPVVREGNKVVLKPAKGHAAERAAMRAARWAFSHPGALRTGQRLASRTRRLHPRSLPGPGKAWSGTRDLPAVPAEPFRDWWQRTNGGKEGGK
bacteria_119549		6442.78	3621.8		0.830887	0.284448		0.00348857	0.00921834		Actinobacteria	ko:K02919	Belongs to the bacterial ribosomal protein bL36 family	rpmJ	50S ribosomal protein L36		MKVKPSVKKICDKCRVIRRHGRVMVICENPRHKQRQG
bacteria_369806		66634.6	37445.8		0.831457	0.15002		2.98477e-08	3.18011e-07		Actinobacteria	ko:K01214	Belongs to the glycosyl hydrolase 13 family	glgX	Glycogen operon protein GlgX		MQVWPGEAYPLGATYDGAGTNFAVFTEAADRVELCLLHDDGSETAVELRESDAFVRHAYVPGIMPGQRDGFRVHGPYDPGRGQRCNSAKLLLDPYAKAVAGEIRWGEEVYGYHFDAPERRNDLDSAPHTMTSVVVNPYFDWGDDRRPRTDYHQTVIYEAHVKGLTMRHPGLPEELRGTYAALAHPAVLEHLTELGVTALELMPVHQFINDHRLVDMGLNNYWGYNTIGFFAPHNTYASWGDRGQQVLEFKSAVRALHEAGIEVILDVVYNHTAEGNHLGPTLSFRGIDNQSYYRLADDPRYYMDTTGTGNSLLMRSPHVLQMIMDSLRYWVLEMHVDGFRFDLAATLARQFHEVDRLSSFFDLVQQDPVVSQVKLIAEPWDVGEGGYQVGNFPPLWTEW…
bacteria_209845		21255.5	11930.8		0.833192	0.224587		0.000207358	0.000848742		Actinobacteria				hypothetical protein		MRLLGVGGGDDVALVVLGDGEQPVHVVHVLLAHPDRGRDRGVRVAPQVDVAHVRPHRGELLEHAIHRLDVAGGEQLGEVADRDAQRFDRAEEVSRGLAVVAGFGEPVDHRRQRRDVPDHRHGAELRVQRQRDPVVLGELVHR
bacteria_208739		21698.9	12179		0.833206	0.257086		0.00119127	0.00378344		Actinobacteria				hypothetical protein		MRGGRGIGVRLGRATDSRSSSSARPAMVDTWNSVSTGRSIMNCCRIIEISCTIISECPPSSKKLSWTPTRCRCRVSAQRPARIFSVGVRGAAYGVAACSSGGGSALRSSLPLGPSGRAGRLTKAEGTMYSGKACARWVRNSAGCGSAASAATT
bacteria_373442		13913.7	7798.09		0.83527	0.296995		0.00491726	0.0121965		Actinobacteria				hypothetical protein		MREKTGMTSEMIPKNGSAMMYTSGCPKNQNRCCHSRAPPLAASKMCAPNFRSASSAKSAAARTGKASRTRTAVSSTFHTKIGMRNMVMPGARMQMIVVMKLTAPRIVPKPEKARPMIHRSAPMPGERTASDSGE
bacteria_138995		38654.2	21608.4		0.839002	0.173567		1.33893e-06	9.65274e-06		Actinobacteria				hypothetical protein		MAGAATATARATASARLTEVFELLGAEAGTRALRARQHTLGADRDAQFLEQVRGRGVRLRRVVEVQLQRLVDQLPARDVVPVDQRDRDALGARAARTADAVQVRLLLFGRLVVDDVGDALDVDTARRHVRADEDVDLAVAEGAQRLLAGALAEVAVDGAGGEAALGELVGEIGRRTFRTAEDHGQSPAVGLQYPRDQLGLVHVVRAVDVLRGVRDRLALVVRRGGADVRGLRHVAARETDDGARHGRREQHRLTAGRQHVHDLLDVGQEAQVEHLVGLVEDERADVAQVQLLLAREVE
bacteria_109284		6149.35	3436.84		0.839449	0.199422		2.56045e-05	0.00013354		Actinobacteria		Protein of unknown function (DUF664)		hypothetical protein		MGKHRRTGERFNLRWLYTHMIEEYARHNGHADLIRERIDGVTGD
bacteria_104946		16600.9	9276.36		0.839626	0.172233		1.0884e-06	7.99668e-06		Actinobacteria	ko:K02914	Belongs to the bacterial ribosomal protein bL34 family	rpmH	50S ribosomal protein L34		MSKRTFQPNNRRRAKTHGFRLRMRTRAGRAILANRRSKGRANLSA
bacteria_335723		40426.2	22533.5		0.843208	0.204032		3.58485e-05	0.000180006		Actinobacteria	ko:K01847	Methylmalonyl-CoA mutase	mutB	hypothetical protein		MGIPDFTGIELGTPTTDGGADEWRTAVKNATQGAEPVWETPEGIAVKPLYTGRDLEGLDFLETYPGVAPYLRGPYPTMYVNQPWTIRQYAGFSTAEESNAFYRRNLAAGQKGLSIAFDLPTHRGYDSDHPRVTGDVGMAGVAVVTAVRGQVEGDRQALLAGREDAPVEGVGLLGGGEARVLADRPGLVDVHRRVRAAQVRRQAGVGGEEVELGDVRG
bacteria_116658		32767.9	18256.6		0.843862	0.182307		3.67779e-06	2.38395e-05		Actinobacteria	ko:K03531	Essential cell division protein that forms a contractile ring structure (Z ring) at the future cell division site. The regulation of the ring assembly controls the timing and the location of cell division. One of the functions of the FtsZ ring is to recruit other cell division proteins to the septum to produce a new cell wall between the dividing cells. Binds GTP and shows GTPase activity	ftsZ	Cell division protein FtsZ		MRDAFKSADQFLLSGVQGITDLITTPGLINLDFADVKSVMSEAGSALMGIGSARGDDRAVAAAEMAISSPLLEASIDGARGVLLSISGGSDLGLFEINEAAQLVSEAAHPEANIIFGAVIDDALGDEVRVTVIAAGFDGGQPPARRETVMGSASARRDEPTPVRQPESRPSFGSLGSVTPKEDPEPVPEPVADLPSSPPVPPSRTYSDSAAEELDVPDFLK
bacteria_163664		21997.3	12252.9		0.844145	0.169123		5.99682e-07	4.67831e-06		Actinobacteria	ko:K03088	belongs to the sigma-70 factor family, ECF subfamily		ECF RNA polymerase sigma factor SigG		MAYLVAVQHLAPRPRAVLILRDVLCWRAKDVAELLGDSVNSVNSALQRARAGMREHLPAERQDWTGGDEDAGTRELVRRYTDASVDTDLDRLAALLRDDVRCSMPPTPGLYVGRDTVVTSWVEDGFQDLEHLRGVLTSVNRQPAVAFYLWRKHENAYLPLTIDVLRITGGAITEIVIFHDDQFPRLGLPERLPADGTE
bacteria_312177		44179.6	24545.5		0.847909	0.158481		8.7851e-08	8.42283e-07		Actinobacteria	ko:K18220	elongation factor G	tetM	Tetracycline resistance protein TetO		MRTLNLGILAHVDAGKTSLTERLLYAAGVIDEIGSVDDGSTQTDSLALERQRGITIKSAVVSFVIGDVTVNLIDTPGHPDFIAEVERVLSVLDGAVLVISAVEGVQAQTRVLMRTLQRLRIPTLLFVNKIDRRGAHDEELLRAIAEKLTPAIVAMGSVRDLGTRDAACAPFEAADAAFTARLAEVLADHDDALLAAYVHDETALSHRRLRGELAAQTGRALAHPVFFGSAITGAGVAALTSGIAELLPATSTRARATGASWRSARPSDRCTTPSGTACVSSRRRATPTRSW
bacteria_368059		9409.08	5226.21		0.848265	0.237989		0.000364822	0.00138632		Actinobacteria	ko:K18955	Acts as a transcriptional regulator. Probably redox- responsive. The apo- but not holo-form probably binds DNA	whiB2	Transcriptional regulator WhiB		MTELVQQLLVDVDDADEELGWQERALCAQTDPESFFPEKGGSTREAKKVCLACEVRSECLEYALANDERFGIWGGLSERERRRLKKAAV
bacteria_192605		23437.3	13016.4		0.848469	0.166485		3.46226e-07	2.85011e-06		Actinobacteria	ko:K00240,ko:K00245	succinate dehydrogenase	frdB	Fumarate reductase iron-sulfur subunit		MKLTLRVWRQQNADAPGAMSTYDVDGISADMSFLEMLDTLNEELILKGEDPVAFDHDCREGICGACSLVINGDAHRPERTTTCQLHMRSFKDGDTIDIEPWRASAFPVIKDLVVDRSAFDRIIQSGGYITAPTGAAPDAHAAPVPKPDADFAFEHAECIGCGACVAACPNGAAMLFTSAKINHLNVLPQGAPERETRVLDMVAQMDEEGFGGCTLTGECATACPKGIPLVSITSMNKEWLRATRKAAKR
bacteria_13459		26841.7	14904.4		0.848692	0.192666		1.05782e-05	6.07269e-05		Actinobacteria	ko:K03529,ko:K19171	Required for chromosome condensation and partitioning	smc	Chromosome partition protein Smc		MVKSGPSTGSPLSLTSDVPCTFIGETAGGYPGVHRVTYRRKVESSGVHLTALTLRGFKSFASATTLRFEPGITCVVGPNGSGKSNVVDALSWVMGEQGAKSLRGGKMEDVIFAGTTGRPPLGRAEVSLTIDNSDGALPIEYAEVTITRIMFRNGGSEYQINGDTCRLLDIQDLLSDSGIGREMHVIVGQGHPLASVITSGTIPACWNANQVPRRPMPVCTSSRMNSAPGSDVIRRASWR
bacteria_322513		35081.6	19446.4		0.851203	0.141959		2.02108e-09	2.88702e-08		Actinobacteria	ko:K06215	Catalyzes the formation of pyridoxal 5'-phosphate from ribose 5-phosphate (RBP), glyceraldehyde 3-phosphate (G3P) and ammonia. The ammonia is provided by the PdxT subunit. Can also use ribulose 5-phosphate and dihydroxyacetone phosphate as substrates, resulting from enzyme-catalyzed isomerization of RBP and G3P, respectively	pdxS	Pyridoxal 5'-phosphate synthase subunit PdxS		MTNTIRKWINLLIPADIRKDGGVARMSDPNMIEEIIEAVSIPVMAKSRIGHFVEAQVLQSLGVDYIDESEVLTPADEVNHSDKFAFTTPFVCGATNLGEALRRIAEGAAMIRSKGEAGTGNVVEAVRHLRQIKGEIARLKGLDNNELYAAAKELRAPYELVREVAELGKLPVVLFSAGGVATPADAALMRQLGAEGVFVGSGIFKSGDPAKRAAAIVRATTFFDDPKVIADASRNLGEAMVGIIIDTLPESEHYANRGW
bacteria_97414		24629.7	13597.6		0.857037	0.193272		9.23424e-06	5.38121e-05		Actinobacteria	ko:K02000	glycine betaine		Glycine betaine transport ATP-binding protein OpuAA		MVFQHFGLLPHRRVVDNVAFGLEIRGMSRAERARRALEVVELVGLSGYENSYPDQLSGGMQQRVGLARALAGDPDVLFFDEPFSALDPLIRRDMQNEVIRLHHEVGKTMVFITHDLSEALKLGDRILIMRDGKMVQCGTGDELVGAPADDYVREFVKDVPRGDVLTLRWIMRELEDGDELDGPELGPDVVVKEATRAVLAADKPVKVVENGKLLGIVGDEEILAVVAGEGGA
bacteria_329050		25280.8	13918.5		0.861031	0.153236		1.92075e-08	2.14401e-07		Actinobacteria	ko:K01951	Catalyzes the synthesis of GMP from XMP	guaA	GMP synthase [glutamine-hydrolyzing]		MVDVDAEERFLTALKGVSDPEEKRKIIGREFIRVFEQAQADIIADAGPEVAFLVQGTLYPDVVESGGGTGTANIKSHHNVGGLPEDLEFQLVEPLRKLFKDEVRMVGQELGLPDEIVQRQPFPGPGLGIRIVGEVTKERLDLLRDADAIAREELTAAGLDRDIWQCPVVLLADVRSVGVQGDGRTYGHPIVLRPVSSEDAMTADWSRLPYDVLAKISTRITNEVADVNRVVLDVTSKPPGTIEWE
bacteria_176621		71715.1	39479.7		0.861154	0.150768		1.11796e-08	1.33746e-07		Actinobacteria				hypothetical protein		MATDYSDALMEEMGKLQEDLDHANAWDLDTQLEKAMDALGCPPGDWPVTNLSGGERRRVALCKLLLEAPDLLLLDEPTNHLDAESVQWLEQHLAKYPGTVVAVTHDRYFLDNVAEWILELDRGRAHPYEGNYSTYLDTKASRLKVEGQKDAKRAKRLKEELEWVRSNAKGRQAKSKARLTRYEEMAAEADKMRDLDLLEVQLPHLVGLGRHLLVPGETRLGLGLTPLGVRPHPLELFLQALGTLGVLLPLDLETALLRLQVRGVVALVTDGPAAVELQDPARDVVEEVPVVGDGDDGAGVLREVLLQPLHGLGVQVVGGLVEKQQVGGLEQQLAQRDTAPLTAGEVGDGPVAGRAAQGVHGLLQLGVQVPRVGVVQVLLELAHLVHERVGVVGRHQLGD…
bacteria_100481		28635.8	15666.7		0.870097	0.134076		8.60773e-11	1.81719e-09		Actinobacteria	ko:K03043	DNA-dependent RNA polymerase catalyzes the transcription of DNA into RNA using the four ribonucleoside triphosphates as substrates	rpoB	DNA-directed RNA polymerase subunit beta		MYILKLHHLVDDKLHARSTGPYSMITQQPLGGKAQFGGQRFGEMEVWALEAYGAAYALQELLTIKSDDVTGRVKVYEAIVKGENIPEPGIPESFKVLIKEMQSLCLNVEVLSSDGMSIEMRDTDEDVFRAAEELGIDLSRREPSSVEEV
bacteria_114128		27774.1	15193.7		0.870239	0.23889		0.000269647	0.00106903		Actinobacteria	ko:K02967	Belongs to the universal ribosomal protein uS2 family	rpsB	hypothetical protein		MSKVPSAVWIVDTKKEHIAVGEARKLNIPVVAILDTNCDPDEVDYKIPGNDDAIRSVTLLTRVIADAVAEGLISRSRVATGDKGEKAAGEPLAEWERDLLEGEKKADSDEAAEKPAEAAAEAPAVEAEAPAVEAEAPAAEAPVAEAPAAEAAPVEAPAAEGEQA
bacteria_88968		6355.9	3468.09		0.873876	0.238543		0.000248905	0.000996863		Actinobacteria	ko:K02909	50S ribosomal protein L31	rpmE	50S ribosomal protein L31		MKREIHPEYVETQVSCTCGASFTTRSTITSGTIRAEVCSECHPFYTGKQKILDTGGRVARFEARFGKAAAANK
bacteria_115141		30424.1	16562.9		0.877232	0.211828		3.45437e-05	0.000174197		Actinobacteria		Belongs to the short-chain dehydrogenases reductases (SDR) family		3-oxoacyl-[acyl-carrier-protein] reductase		MAAASSTCSGRGLGLAYAHALAAHGASVVVNDVDENVAEQAVKSITAAGGTAVAEVVPVGTTEAAERLVNRAVEEFGRLDILVTNAGILRDKVLWKMTDDDFDAVIATHLKGTFTCARAAAVRMREQGEGGTLILVGSPAGQRGNFGQTNYAAAKAGIAAFARTWSMELGRANITVNAIVPVAATAMTETIPAFAPYVEALKNGEPFPDFLRKGEGFGTPEDCAALVPFLASEAARGVTGQAIGIGGDKVALWSHPQEIRTAYADGGWTPETLADVFPTSVGAELQTVGIPAPKFPEA
bacteria_283515		25522.8	13874.8		0.879309	0.188441		3.06764e-06	2.02107e-05		Actinobacteria	ko:K02028	ABC transporter, ATP-binding protein	ehuA	Glutamine transport ATP-binding protein GlnQ		MSADTPLMKEPDANTNPPVDGSELIRFEDVTKRFGSNTVLDRLNFSVDSGKHVTLIGPSGSGKTTILRMLMTLTKPDEGTVTVDGEKLFPAPEKQLREVRKKIGMVFQQFNLFPNMTVLRNITEAPVTVLGMSKDEAEARARELLDLVGLADKADARPTQLSGGQQQRVAIARALAMRPRVLLLDEVTSALDPELVAGVLDVLRDIARTTDITMLCVTHEMNFARDISDQVLMFDSGRIIESGPPEKIFSDPAQDRTREFLSAVL
bacteria_95998		80724.1	43855.6		0.880232	0.273004		0.00126305	0.00397686		Actinobacteria				hypothetical protein		MAAALEVPHLVVAHGVDERLRPRVAAEEVLLDVRAVVRLVGLVVTVGCDVHQVYERTVAVRVQQRVPLAAPDDLDDVPAGAAEERLQLLDDLAVAAHRAVEALEVAVHDERQVVQLLVRRQLEQAARLRLVHLAVAKERPYVLVRRVLEATVAQVAVEPRLVDRVHRADAHRDRGELPEVRHQARVRVRRQTATRTGVRVLLTEAVELVLRQPALEVGARVHTGRGVALDEDLVAAAGVVLAAEEVVEADLVERGAGRVRRNVATNTHTRPLRAVHRHRRVPADPRAVAALHLLVTGEPRLPLGGDGVDVVRAGQRRNADLVLAGSLQQTKHQVPGPLLTAALEHLVERLEPLGRLFGVDVRQVCGQTVTNDTHPLGAGVLRAQGVSSASLAVHAWARK…
bacteria_31607		20347	11052.8		0.880374	0.20561		1.85406e-05	0.000100301		Actinobacteria				hypothetical protein		MGVEVHRQIELAAQRRHEGRGGRGPQQARHVLDGQDVGTGIDQLLGEAEVVVQGVQPLRRVGQVGRVAQGDLGDRRSRLAYGVDRGPHLAHVVERVEDPEDVDAGGRGLLHEGVGHLGRVRRVAHGVAAAQQHLQADVRHGLAERGQAFPGVLGEEAERDVVGGAAPALQGQQLGQGPRHHGGDGEHVLGTDPGGQK
bacteria_255179		14900.9	8089.11		0.881264	0.17746		6.83559e-07	5.25577e-06		Actinobacteria		glyoxalase bleomycin resistance protein dioxygenase		hypothetical protein		MERVLGIGGYFLRADDPSALSAWYRDCLGLDADENGLWRPDAGPTVFATFESETDYFGSRAQQSMLNFRVRDLDAMLAQLRAMGADVADEVQQMDGVGRFGWVTDPAGNRIELWQRA
bacteria_218613		27439.9	14878.3		0.88303	0.169416		1.86614e-07	1.63646e-06		Actinobacteria	ko:K02003	ABC transporter		Macrolide export ATP-binding/permease protein MacB		MTSAVTIPRHGGTGGRTAVAARARQVVKAYGSGETRVVALDHVYVDIARGQFTAIMGPSGSGKSTLMHCLAGLDTVTGGQIYLDDTEITGLKDKKLTQLRRDRIGFIFQAFNLLPTLNALENITLPMDIAGRKPDKQWLARVVDTVGLSDRLKHRPTQLSGGQQQRVAVARALAARPEIIFGDEPTGNLDSRAGAEVLGFLRRSVDELGQTIVMVTHDPVAASYADRVLYLADGRIVDEMYKPTADAVLDRMKDFDARGRTS
bacteria_09996		8540.85	4625.17		0.884883	0.173613		3.453e-07	2.84582e-06		Actinobacteria	ko:K03696	associated with various cellular activities	clpC	ATP-dependent Clp protease ATP-binding subunit ClpC1		MRQQVIQLLSGYQGKETAGASGGPAEGTPSTSLVLDQFGRNLTQAARESKLDPVIGREKEI
bacteria_289398		23582.7	12765.1		0.885495	0.375928		0.0184983	0.0346405		Actinobacteria		Short-chain dehydrogenase reductase sdr		Cyclopentanol dehydrogenase		MSTNEFEGKKALVTGATSGIGRAIAVKLAEQGATVYVTGRRAELGKETVELIEKAGGTGHFIVADVANIDDVRKLAQEVGEVDVLVNNAGIFPFSPTPDQSLDSYQQVFDVNVRAAYFLTAALVPAMVAKGKGSIVNVSSIAAVIGTPVGSVYNASKAAMDALTRSWAVEFGPAGVRVNSVAPGPIATDMALESVGEMFDAITSLTALGRVGQPEEIAEAVVFLASDRSSYVTGSVITADGGYVAS
bacteria_63606		99465.5	53732.7		0.888381	0.168633		1.37813e-07	1.25394e-06		Actinobacteria	ko:K03701	The UvrABC repair system catalyzes the recognition and processing of DNA lesions. UvrA is an ATPase and a DNA-binding protein. A damage recognition complex composed of 2 UvrA and 2 UvrB subunits scans DNA for abnormalities. When the presence of a lesion has been verified by UvrB, the UvrA molecules dissociate	uvrA	UvrABC system protein A		MDKPDVDFIEGLSPAVSIDQKSTSRNPRSTVGTITEVYDYLRLLFARIGKPHCPECRRPISRQSPQAIVDKVLELPEGSRFQVLSPLVRERKGEFVDLFADLQTKGYSRARVDGETIQLSDPPALKKQEKHTIEVVIDRLTVKDTAKRRLTDSVETALGLAGGMVVLDFVDLPEDDPERERMFSEHLYCPYDDLSFEELEPRSFSFNSPFGACPDCSGIGTRMEVDPELIVPDEDKSLDEGAIHPWSHGHTKDYFSRLVTALADALGFRTDIPFAGLPLRARKALLHGHKTQIEVRYRNRYGRERVYTTPFEGAVPFVKRRHSESESDASRERFEGYMREVPCPTCQGTRLKPIVLAVTVMERSIAEVAAMSISDCAEFLAKLKLDARDKKIAERVLKE…
bacteria_114844		14555.7	7862.95		0.888486	0.188136		2.32866e-06	1.57713e-05		Actinobacteria	ko:K02887	Binds directly to 23S ribosomal RNA and is necessary for the in vitro assembly process of the 50S ribosomal subunit. It is not involved in the protein synthesizing functions of that subunit	rplT	50S ribosomal protein L20		MARVKRAVNAQKKRRAILEQASGYRGQRSRLYRKAKEQVTHSLVYNYNDRKKRKGDFRQLWIQRINAAARANGITYNRFIQGLKAANVEVDRKILAELAVNDATAFAALVEVAQKALPSDVNAPKAA
bacteria_177342		43262	23357		0.889277	0.108177		2.0254e-16	2.15595e-14		Actinobacteria				hypothetical protein		MQSDDGLPRTRTAVDDESAAGSRADDGVLVGLDGAEHVPHPGRPVAAQAGDEGGLVVERGVPFEPVRGEHLVPVVTDPAAGPAVPAAARQAHRVGVGGSEERLGRGGAPVEQQPATLAVREAEPSDVHGLGVVRADHVPEAQVQAEATQCAQASGQPVYLQVPVQRLPALAAGRLARGVEAVGQVGDRVLKALRDGREVLLIAGDQLRVGLGSEVVGKIKRTGGQRVHVIGSDLRSLATDAR
bacteria_62242		30331.3	16367.8		0.889933	0.27053		0.00100335	0.00326145		Actinobacteria				hypothetical protein		MVEARGAHLAAHEAQAVRQHRGAQQAVVGGVGQQRAVHHRVVGQRRDGAHPDRAFGRAHHRRQQVVGLDTAVFDAVRLQALDAPALGQAIAEREALVEFAREALGALHCGHGELVLDAVVHRLERGRHLEDDALLLARHHVPRGEAAAVAHAVHAVFDGCMLARQQKVGVHRMHRPVGAHREARGRERLAEHLAAEHGGRADVFALGQEFVASERLELHERDEFGDKAGGGGGIGGHRRRSVQCEGSNPRP
bacteria_296718		17689	9537.88		0.891046	0.1683		1.19425e-07	1.10195e-06		Actinobacteria	ko:K00240,ko:K00245	succinate dehydrogenase	frdB	Fumarate reductase iron-sulfur subunit		MRSFADGDTNDVEPWRAAAFPVVKDLVVDRSAFDRIIQAGGYVTAPTGAAPEAHATPVPKPDADFAFEHAECIGCGACVAACPNGAAMLFTSAKVNHLNVLPQGAPERETRVLDMVAQMDEEGFGGCTLAGECATACPKGIPLVSITGMNSEWLRATRKVSGR
bacteria_152953		65165.5	35048.2		0.894758	0.225181		7.08248e-05	0.000328298		Actinobacteria				hypothetical protein		MALGQLGDVDQALDALVHADERTERNQLRDLARHDLGDRVGAGELAPRVFLGRLQRQGDTLALHVDVENLDGDFLADLDNLGRVVDVLPGQLRDVDETVDATQVHEGTEVDDRGHDALADLALLELVEELAADLGLGLLEPGAAGQDHVVAVLVQLDDLRLELTADVRLEVADATHLDERGGEEAAEADVEDEATLDDLDDRALDGLVLLLERLDGAPGALVLSTLLGEDQAAFLVLLLENKRLDLVTNLDNLVGVDVVLDRQLTRGDDALGLVADVEQDLVPIDLDDGALNDVAIVEVLDRRVDSCEEVLLRPDVVDRDLLGSSGNGGGGGVGGH
bacteria_231043		43997.8	23650.1		0.895575	0.178958		5.6044e-07	4.39351e-06		Actinobacteria	ko:K01214,ko:K02438	Belongs to the glycosyl hydrolase 13 family	glgX	Glycogen operon protein GlgX		MVRALHEAGIEVILDVVYNHTAEAGELGPTLSLKGIDNRGYYRLQSDARRYADYTGCGNTLHVVQPHVLRLITDSLRYWVTEMGVDGFRFDLAAALARSMHDVDMLSPFLAVIAQDPVLRRVKLIAEPWDVGSGGYQVGAFPPLWTEWNDRYRNAVRDFWRGALPDVRDLGYRLSGSSDLYAWGGRRPYASVNFITAQDGFTLRDLVSYERKHNEANGEGNRDGTDDNRAWNCGTEGETDDERVRALRRRQLRNLLTTLLLSTGVPMLVAGDELGRTQRGNNNAYCQDNEISWVDWGLLEDPGWKALFDLTARLIALRHRHPVLRRRAFFSGRAHSADGLRDLAWFTARGAEMTERDWYAPAGTLGMYLSGRDIPGRDERGAPIVDDSFLAVLHAGDRP…
bacteria_243239		16567.8	8901.4		0.896253	0.175924		3.49594e-07	2.87184e-06		Actinobacteria	ko:K22468	polyphosphate kinase	ppk2	Polyphosphate:GDP phosphotransferase		MEHLPSAGEIALFDRSWYNRAGVEHVMGFCTKEEYQLFLRQCPIFERMLVEDGILLRKYWFSVSDSEQQDRFRRRLQDPVRRWKLSPMDLESITRWEAYSRAKDEMLVHTDVREAPWYVVESDDKRRARLNMIAHLLGSLPYHEVPPPVLELPDRPASTGYVRPPRDLQNYVPDHAANL
bacteria_181898		25035.5	13446.8		0.896692	0.162252		3.26583e-08	3.45139e-07		Actinobacteria	ko:K00760,ko:K04075,ko:K15780	Belongs to the purine pyrimidine phosphoribosyltransferase family	hpt	Hypoxanthine-guanine phosphoribosyltransferase		MGADLKEVLITKEEIDAKLVELAAKIDAEYAGKDLLIVGVLKGAVMVMADLARALSTPVTMDWMAVSSYGAGTQSSGVVRILKDLDTDIKGKHVLIVEDIIDSGLTLSWLLSNLGSREPESLKVCTLLRKPDAAKVAIDVEWVGFDIPNEFVVGYGLDYAEKYRNLPFVGTLAPHVYGG
bacteria_186700		31200.2	16733.5		0.89883	0.167509		8.05668e-08	7.76236e-07		Actinobacteria				hypothetical protein		MALDVEVVDARQMCQPVGGAREFGRDAGAGQVAQVGEGARLDRAAAPDDAHPVAQLLDLAEDVGRQQDRTAALPLLLDTALEDLLHQRVQARGRLVQDQQVHVRGERGDQGDLLAVALRVGAALLGGVQLEALDQLGAACRIEATAETAVQVDDLAARQVPPQRHVARDVGDASVHLDRVGPRVAAQHLRCAGVGAQQAEQDAEGGGFAGAVGAEEAVHLTGLDVQVEAVEGVGAAERLVESGDADCLRHASERTLLSEICEVNELYKRSDIIEGWQSRRRWERQERWVGTRRRSRGSSSTSRRNSWRPGCPGCRPGSSGRCSPRTPAL
bacteria_368339		23563.3	12632.1		0.899398	0.15155		2.94466e-09	3.99325e-08		Actinobacteria	ko:K02003	ABC transporter		putative ABC transporter ATP-binding protein		MTTTPVAGRTTTVAARATDLSKIYGQGETQVVALDRVTVEFHQAEFTAIMGPSGSGKSTLMHCVAGLDTFSSGSVRIGETELGSLKDKQLTKLRRDKIGFIFQAFNLLPTLTALENITLPMDIAGRKPDKQWLESVIQMVGLRDRLTHRPAQLSGGQQQRVAVARALASRPDIIFGDEPTGNLDSRSGAEVLGFLRNSVRELGQTVVMVTHDPVAAAYADRVVFLADGRIVDEMYQPTADNVLDFMKQFDAKGRTS
bacteria_80081		18791	10067.1		0.900364	0.153962		4.97594e-09	6.38061e-08		Actinobacteria	ko:K03569	cell shape determining protein, MreB Mrl	mreB	Cell shape-determining protein MreB		MSPASSGGVESRVERTAEQIKITIGSAYDLDADEHTEIRGRDLVSGLPKTVVISAAEVRKAIEEPVNAIVDAVKTTLDKCPPELSGDIMDRGIVLTGGGALLRGLDERLRRETGMPIHIAEDPLDSVALGSGKCVEEFEALQQVLDAQPRR
bacteria_321658		21028.5	11249.1		0.902532	0.176176		3.00856e-07	2.51472e-06		Actinobacteria	ko:K02835	Peptide chain release factor 1 directs the termination of translation in response to the peptide chain termination codons UAG and UAA	prfA	Peptide chain release factor 1		MKAKGTVEPGQAPFARLKYEGGVHRVQRVPATESQGRIHTSAAGVLVTPEAEEVDVEIHANDLRIDVYRSSGPGGQSVNTTDSAVRITHIPTGVVASCQNEKSQLQNKEQAMRILRSRLLAAAQEEAEREAADARRSQVRTVDRSEKIRTYNFPENRISDHRVGFKAYNLDQVLDGDLDAVIQACVDADSAAKLANA
bacteria_84853		5414.48	2893.17		0.904177	0.246408		0.0002431	0.000976269		Actinobacteria	ko:K00134	Belongs to the glyceraldehyde-3-phosphate dehydrogenase family	gap	Glyceraldehyde-3-phosphate dehydrogenase 2		MVQEGNSVKILGWYDNEWGYSNRLVDLTVFVGNQL
bacteria_377130		11400.4	6088.11		0.905083	0.161415		2.05647e-08	2.27681e-07		Actinobacteria	ko:K22010	response regulator	pdtaR	hypothetical protein		MTAPESPQPVDAPDDDKSHVPPLTTRVVIAEDEALIRLDLKEMLEEEGYSVVGEAGDG
bacteria_84107		34468.9	18391		0.906283	0.299831		0.00250572	0.00702126		Actinobacteria		Response regulators consisting of a CheY-like receiver domain and a winged-helix DNA-binding domain		Transcriptional regulatory protein TcrA		MRVLIVEDEPYLAEAVRDGLRLEAIAADIAGDGDSALELLSVNSYDIAVLDRDIPGPSGDEVARRIVASGSGMPIIMLTAADRIDDKASGFSLGADDYLTKPFELRELVLRLRALDRRRAHARPPVREIAGLRLDPFRREVFRDERYVALTRKQFAVLEVLVAAEGGVVSAEELLERAWDENADPFTNAVRITVSALRKRLGEPWIIATVPGVGYRISP
bacteria_21914		45598.2	24296.1		0.908204	0.14783		8.06811e-10	1.29603e-08		Actinobacteria	ko:K02469	A type II topoisomerase that negatively supercoils closed circular double-stranded (ds) DNA in an ATP-dependent manner to modulate DNA topology and maintain chromosomes in an underwound state. Negative supercoiling favors strand separation, and DNA replication, transcription, recombination and repair, all of which involve strand separation. Also able to catalyze the interconversion of other topol…	gyrA	DNA gyrase subunit A		MADENTPVTSEEGGVIAQRVEPVGLETEMQRSYLDYAMSVIVSRALPDVRDGLKPVHRRVLYAMYDGGYRPERGFYKCARVVGDVMGNYHPHGDSSIYDALVRLAQPWSMRMPLVDSNGNFGSPGNDPAAAMRYTECKLAPLSMEMVRDIDEETVDFTDNYDGRSQEPTVLPARFPNLLINGSAGIAVGMATNIPPHNLREVASGAQWYLENPEASHEELLDALIERIKGPDFPTGALVVGRKGIEEAYRTGRGSITMRAVVEVEEIQNRQCLVVTELPYQTNPDNLAQKIADLVKDGKVGGIADVRGNSARVWLGAS
bacteria_232589		11174.9	5953.18		0.908506	0.198326		4.63032e-06	2.92415e-05		Actinobacteria	ko:K03664	the 2 termini fold to resemble tRNA(Ala) and it encodes a tag peptide , a short internal open reading frame. During trans-translation Ala- aminoacylated tmRNA acts like a tRNA, entering the A-site of stalled ribosomes, displacing the stalled mRNA. The ribosome then switches to translate the ORF on the tmRNA	smpB	SsrA-binding protein		MVSLTDGFVQIEGDEAWLHAAHIPEYSQGSWTNHSARRKRKLLLHREEIDKLAVKSEETGHTIVPLALYFKDGRAKAEIALARGKKEYDKRQTLREQQDRRETDRAIAAVKRKQRHA
bacteria_229157		48352.5	25697.7		0.911903	0.128978		1.54666e-12	4.97804e-11		Actinobacteria	ko:K00108	Involved in the biosynthesis of the osmoprotectant glycine betaine. Catalyzes the oxidation of choline to betaine aldehyde and betaine aldehyde to glycine betaine at the same rate	betA	Oxygen-dependent choline dehydrogenase		MAPQQYDFVIVGGGSAGSALANRLSADPGNKVLVLEAGRPDYPWDVFIHMPAALTYPIGSRFYDWKYESEPEPHMGGRRVYHARGKVLGGSSSINGMIFQRGNPMDYERWAADPGMGSWDYAHCLPYFKRMENCLAADPDDEFRGHDGPLVLERGPATNPLFTAFQKATEEAGYAPTDDVNGYRQEGFAKFDRNVHRGRRLSASKAYLKPARKRPNLTVTTRALVTRVLFEGKRAVGVEYRRGTGALQQVRAKEVILCGGAINSPQLLQLSGVGNAEELRALGIDVVHDLPGVGENMQDHLEVYIQYACKQPVSMQPYLAKWRAPFIGLQWLFRKGPAATNHFEAGGFARSNDDVDYPNLMFHFLPIAVRYDGSVPAGGPRSAGSGTSGWGSRRPRCCG…
bacteria_216441		59925.4	31847		0.911994	0.222788		4.24829e-05	0.000210037		Actinobacteria				hypothetical protein		MLDHRVDAALGVAGELGQVVGVDGQRLVEVLREDVLGRLGVRTLDLDLHVEPPRPQDGRVDHVLAVGGADHDDVLQALDAVDLGQQLRHDRGLDVGGHARAAGAEDRVHLVEEHDHRGALGGLLASPLEDQADVPLGLADELVEQLGALDVEEVRLGLAVVVAPRRRDLLGQGVGHRLGDQGLAAAGRAVQQHALGRAQLVLVEQLGVQEGHLHGVADGLDLPEQAADVAVVDVRHLLQHEVLDLRLGHPLVGVAGLGVHQQRVARLERGVDQRVGQPHHALLVGMADDQRAGAARLVVAEQLTQDAHLAGALEAAGLHDRQRLVQPDRLAQLEGPAVNRGGHRHTHTTAGGEHVHRSVLVSGQVDAVAAGRLGEPVHLLAEGEKLAACLSEGVDQLGV…
bacteria_225922		38651.7	20489.4		0.915666	0.134386		9.51264e-12	2.51629e-10		Actinobacteria	ko:K02032,ko:K10823	Belongs to the ABC transporter superfamily	bldKE	Vitamin B12 import ATP-binding protein BtuD		MIFQDPYSSLNPRQTVGSIIKSPMEVNGIEPEGGRETRVRELLELVGLNPEHYNRFPHEFSGGQRQRIGVARALALKPKLIVADEPVSALDVSIQAQVVNLLKKVQDELGIAFLFIAHDLAVVRHFSQRVAVMYLGKIVEVGDRESIYNRPRHPYTHALLSAVPEVDIDGTGASRERIRLSGDVPSPILPPSGCRFRTRCWKAQDKCATDEPPLVQISGNLAGHLTACHFPEDPTTEARDEDVIMDPALKALEDVTDSAEPSATDEAPAKD
bacteria_50312		21509.9	11391.2		0.91704	0.268637		0.000640935	0.00223247		Actinobacteria	ko:K02520	IF-3 binds to the 30S ribosomal subunit and shifts the equilibrum between 70S ribosomes and their 50S and 30S subunits in favor of the free subunits, thus enhancing the availability of 30S subunits on which protein synthesis initiation begins	infC	Translation initiation factor IF-3		MDYGKFKYESAMKAREARKNQAHTVIKEMKLRPKIDPHDYDTKKGHVVRFLKQGDKVKITIMFRGREQSRPELGYRLLQRLASDVEDLGFIESNPKQDGRNMIMVLGPHKKKTEAMAEAREAQAVRKAEAKANPGKSQNAAEIDELDEDIVDDGDTAADEGIAEGTVEASAETSSQV
bacteria_355620		32709.9	17259.4		0.922318	0.213717		1.59159e-05	8.76116e-05		Actinobacteria	ko:K02600	Participates in both transcription termination and antitermination	nusA	Transcription termination/antitermination protein NusA		MDIDMSALRGLVREKEISFSLLVEAIESALLIAYHRTEGSRRHARVELNRETGHVTVWAKEDPEDLEEGQEAREFDDTPSGFGRIAATTAKQVILQRLRDAEDDATLGEYAGREGDIVTGVVQQGRDPKNVLVDIGKLEAILPVQEQVPGESYQHGLRLRSYVVRVAKGVRGPSVTLSRTHPNLVKKLFALEVPEIADGSVEISAIAREAGHRTKIAVRSTRSGLNAKGACIGPMGGRVRNVMAELNGEKIDIVDWSDDPAEMVANALSPARVSKVEVVDLAARSARVTVPDYQLSLAIGKEGQNARLAARLTGWRIDIRPDTEQPAE
bacteria_361977		17569.4	9267.46		0.922812	0.198259		3.24642e-06	2.12776e-05		Actinobacteria		glyoxalase bleomycin resistance protein dioxygenase		hypothetical protein		MERVLGIGGYFLRAADPAALSAWYRECLGLDADDHGLWRQETGPTVFATFDSGTDYFGSRAQQSMLNFRVRDLDAMLAQLRALGADVAEETQDMEGVGRFGWVTDPEGNRVELWQPSEDDVPPSSG
bacteria_81311		39185.8	20660.9		0.923392	0.17561		1.45481e-07	1.32032e-06		Actinobacteria	ko:K01876	Aspartyl-tRNA synthetase with relaxed tRNA specificity since it is able to aspartylate not only its cognate tRNA(Asp) but also tRNA(Asn). Reaction proceeds in two steps L-aspartate is first activated by ATP to form Asp-AMP and then transferred to the acceptor end of tRNA(Asp Asn)	aspS	Aspartate--tRNA ligase		MTSPFPRIPFRESMLKYGSDKPDLRAQLELVDITDVFEGSEFKAFAGKHVRALPVPDVAAQSRKFFDQLGDFAVTLGAKGLAWVRVAEDGSLTGPIAKFLTEENVAELTKRLSLAAGHAVFFGAGEFDEVSKIMGAVRVEAAKRAGHFEENVFRFCWIVDFPMYEKDEETGKIDFSHNPFSMPQGGLEALETQDPLDILGWQYDIVCNGVELSSGAIRNHEPEIMLKAFEIAGYDRETVEDKFAGMLRAFRFGAPPHGGIAPGVDRIVMLLADEPNIRETISFPLNGNAQDLMMGAPTELEEARLRELHLSVRKPQPK
bacteria_380143		55263.8	29106.2		0.924998	0.324026		0.00430767	0.0109473		Actinobacteria				hypothetical protein		MLARVLGVGLQRLEALLDGVLVGAGEGGEDQVAAVRVALGHRQLVAVLDGAADLVDVGEVDLRVDALAEHVHGQRDQADVAGALTVAEQAALDAVRTGQVAQLRRGHAGAAVVVRVQAQDDRLAPGQVPGHPLDAVRVDVRGGHLDRGRQVDDQRLLGGRLDDLGDRVADLEGVGQLGAGVGLRGVLVAEVGLRVVLLLGLGELRGVDGDLLDAVAIAAEDDPALQDRGRGVEVDDRLVRSAQGLERAGDQLFAALGQDLDRDVVRDGAVLDDLADEVEVGLARGGEAHLDLLEAHADQEVEHLALARRGHRVDQGLVAVSQVHRAPLGRFVRPLGRPGAVRDVDHLYQLVERPVAVEGHAAAQLAVPARLGVRGLARRLADSAVTRGVGVGGSHLLVL…
bacteria_160348		8527.45	4486.41		0.926506	0.224328		3.62529e-05	0.000181779		Actinobacteria				hypothetical protein		MAPSFPGSKTCAPNLRSASSASSAAARTGTAISTSTLVSRMFQVKIGIRNIVMPGARMQKIVVMKLTPPRMVPKPASARPMIQRSLPTPGEKIWLFSGA
bacteria_83588		6878.67	3617.14		0.927193	0.338182		0.0061122	0.0144795		Actinobacteria	ko:K00831	Catalyzes the reversible conversion of 3- phosphohydroxypyruvate to phosphoserine and of 3-hydroxy-2-oxo-4- phosphonooxybutanoate to phosphohydroxythreonine	serC	Phosphoserine aminotransferase		MAEIQIPADIKPADGRFGAGPSKVRTEALDALAATGTSLLGTSHRQAPVKNLVGQVREGISELFSLPEGYEVVVSTKNK
bacteria_253434		77613.5	40786.5		0.928194	0.173344		8.57243e-08	8.23233e-07		Actinobacteria	ko:K05343	trehalose synthase	treS2	Trehalose synthase/amylase TreS		MIVNEPVPDTFEDTPVKDRDPEWFKRAVFYEVLVRSFQDSNGDGVGDLKGLTAKLDYLQWLGVDCLWLPPFFKSPLRDGGYDVSDYTAVLPEFGDLADFVEFVDASHQRGMRVIIDFVMNHTSDQHPWFQESRAHPDGPYGDYYVWADDDKQYQDARIIFVDTEASNWTFDPVRKQYYWHRFFSHQPDLNYENPAVQEEILAALRFWLDLGIDGFRLDAVPYLYQTEGTNCENLPRTHEFLKHVRKEIDAHYPDTVLLAEANQWPEDVVDYFGDFQSGGDECHMAFHFPVMPRIFMAVRRESRYPVSEILAKTPAIPSNCQWGIFLRNHDELTLEMVTDEERDYMWADYAKDPRMRANIGIRRRLAPLLDNDRNQIELFTALLLSLPGSPILYYGDEIG…
bacteria_212789		10390.5	5460.02		0.928218	0.267778		0.000527525	0.00190038		Actinobacteria				hypothetical protein		MTTGSLCLTEILKSWKSCSSNSEASQTADSTSASGVALPYFCSSRGSSEPALTPIRSDVPWSFAACAISFTWSSNLRMLPGFTRTAAQPASIAAKT
bacteria_260230		51769.3	27199.6		0.928487	0.17967		2.3694e-07	2.01673e-06		Actinobacteria				hypothetical protein		MVVRRRAVLQLLVGDRDVQPVAEALEVGDGQLLHLVRRVAALEVGAQRPALDRLRQDHRRLALVRLGGREGRVDLLVVVTAAAQVQDLVVGHVLDHRAQPVIVTEEVVADVRPGLRGVRLELAVRRGVQLVDQDAVAVLREQRVPTAVPHQLDDVPSGAPELRLQLLDDLAVAAHRAVEPLQVAVDDEGQVVEALTGGDGQLAQRLGLVHLAVAEERPDVRLGGVRDGARLHVAVHPRLEDRAERAEAHGDGRELPEVRHQTRVRVRGQAVRRLRLLLAERVELLLAEPVEKERAGVDTGGGVALEEDLVAAVALVLAPEEVVEAHVVEGGGGGEGRDVAADADPGPLGARDHHGRVPPGRVEDAALDLLVAGEEGLVLRRDRVDVVRAPHLGHGHALL…
bacteria_19588		22342.1	11732.9		0.929183	0.360774		0.0100087	0.0214213		Actinobacteria		response regulator, receiver		Transcriptional regulatory protein KdpE		MTSVLVVDDEPQIVRALRINLRARGYDVMTAYDGRSALGVAVEGKPDVVVLDLGLPDIDGVEVIAGLRGWSAIPIIVLSARTDSSAKVEALDAGADDYVTKPFGMDELLARLRAAVRRGLARDIGDPVVETSSFVVDLVVKKVWRAGHEVHLTPTEWGLVEILARNPGRLVSQKQLLQEVWGPMHVNESQYLRVYFAQLRRKLEDDPAHPRHLITEPGMGYRFEV
bacteria_260908		19364.7	10159		0.930652	0.228662		4.70167e-05	0.000229816		Actinobacteria	ko:K01464	Dihydropyrimidinase	hydA	D-hydantoinase		MSSRTVIRGGLVITASDEIHADVLIEDGRIAALAASGTSAAESFTADRTIDATGKYVIPGGVDAHTHMELPFGGTFASDTFETGTRAAAWGGTTTIVDFAVQSVGHSLREGLDAWHAKAEGNCAIDYGFHMIVSDVNEGTLKEMDHLVEEGVTSFKQFMAYPGVFYSDDGQILRAMQRSAENGGLIMMHRIYVA
bacteria_112161		30984.7	16216.1		0.934102	0.193219		1.33529e-06	9.63045e-06		Actinobacteria	ko:K03088	belongs to the sigma-70 factor family, ECF subfamily	sigH	hypothetical protein		MGSTICPNRRSSADLDWTVLYASKTGPIRAAGGHNVHASETAGRLSSDSSGIGFGSITSSEEVGPVTGTDAGTEHGQAEQPEGPGRSESTVERSARFERDALEFLDQMYSAALRMTRNPADAEDLVQETYAKAYASFHQFREGTNLKAWLYRILTNTFINSYRKKQREPQRSAAEEIEDWQLARAESHMSTGLRSAESQALDHLPDSDVKEALQAIPEEFRIAVYLADVEGFAYKEIADIMGTPIGTVMSRLHRGRRQLRGMLEDYARDRGLVPAGAGESNEAKGSGS
bacteria_110226		56654.8	29592.1		0.93697	0.134114		2.82063e-12	8.39067e-11		Actinobacteria	ko:K00789	Catalyzes the formation of S-adenosylmethionine (AdoMet) from methionine and ATP. The overall synthetic reaction is composed of two sequential steps, AdoMet formation and the subsequent tripolyphosphate hydrolysis which occurs prior to release of AdoMet from the enzyme	metK	S-adenosylmethionine synthase		MIAGEITTKARIDYPRLAREVVKRIGYTAGEMGFDGNTCGVLVAVDQQSRDIGQGVDTGGAGDQGMMFGYACDETPELMPLPINLAHRLSRRLSEVRKNGTIPYLRPDGKTQVTIEYDGNKPVRLDTVVVSSQHASDIDLDSLLAPDIREFVVEHVLNGLVEDGIKLDTENYRLLVNPTGRFEIGGPMGDAGLTGRKIIIDTYGGAAAVAGEAAVGVDDDLATGEPGVAHGTADHELAGRVHQQAVVLGVELDALVQERLQLRLHDELADVGGEQRVQVDVGRVLRGDDDGVQTDRLVPVVLDGDLGLAVGAQVGDGPVLADVRQALRQPVRQEDRQRHQGRRLVGGVAEHQALVAGALAVQLVLVALDPGLVRRVDTLGDVRGLRADGHRDAAGGAVE…
bacteria_06685		51101.2	26685.4		0.937295	0.328524		0.0043302	0.0109908		Actinobacteria				hypothetical protein		MRDLDPGRAQQGTRVPGLARGEEDAVTGVGADGLGQAVALGVGEVLGDRAAERAVLGDQHVGQALVTALLGELLPRVERAPRLGGATRHDDGADVRRLEHAERRVLEVLGQLGELDLETQVRLVRAVLRHRLGVGDAAERQRQLDVLRLLPDGGEQLLGERDDVVLLDEAHLDVELGELRLAVGAEVLVPVATRDLVVALHATDHQQLLEQLRRLRQRVPGAGAQPRGHQEVTRALGRGAGQGRRLDLDELLAVQNLSRDPADLAAQPDGLGGAFPAKVEVAVLEASLLARLGVALDLERQRRRLVEHLEVAHVDLDRTRGQLGVLTAVGPPAHLAGDLDDVLAAQPVRALGHLALAEHDLGHPGGVAQVDEDDTAVITPASDPPGEGDGLPGVLGPE
bacteria_103769		51089	26648.1		0.938975	0.196631		1.79424e-06	1.24967e-05		Actinobacteria	ko:K02056	ABC transporter	yufO	Galactose/methyl galactoside import ATP-binding protein MglA		MHAIVGENGAGKSTLMKILYGVQKPDDGSIEINGAPASMSSPADAIKLGIGMVFQHFMLADNLSVLENVVLGAEKLYGIGDKARAKVEEISTTYGFGLDPDELVEGLGVGERQRVEILKVLYRGAKTLILDEPTAVLVPQEVEALFDNLRELKSEGLTVIFISHKLGEVLSVADEITVIRRGTTVGTVEPAGTTPKQLAELMVGSELPTPETEESTVTDVTLLKLDGLRLAQTDLDGVERIILDDISFTIHQGEVLGIAGVEGNGQSELVEAIMGIRTLDSGTVTLDGTDISHVPTRHRREAGVGYIPEDRHRHGLLLEAPLWENRILGHVTERPNSRGQLLDIKAARTDTERIITAYDVRTPGIDVTAASLSGGNQQKLIVGREMSHAPKLLIAAHPT…
bacteria_301677		10514.5	5465.13		0.944065	0.213334		9.63146e-06	5.58543e-05		Actinobacteria	ko:K18955	Acts as a transcriptional regulator. Probably redox- responsive. The apo- but not holo-form probably binds DNA	whiB	Transcriptional regulator WhiB1		MDWRHNAVCREEDPELFFPIGNTGPALLQIEEAKAVCRRCPVMEQCLQWALESGQDSGVWGGLSEDERRAMKRRAARNRARQATA
bacteria_299997		32988.8	17141.3		0.944466	0.198492		1.95317e-06	1.34657e-05		Actinobacteria	ko:K00989,ko:K02428	Phosphorolytic exoribonuclease that removes nucleotide residues following the -CCA terminus of tRNA and adds nucleotides to the ends of RNA molecules by using nucleoside diphosphates as substrates	rph	Ribonuclease PH		MSVGIGGGVPLLDLCYEEDVRAETDMNVVCTGDGRFVEVQGTAEAEPFARDDLYALLDLAVAGADDVHVGLGADVFLVAEVQERHLADDADRYGADRAGEGLAAGSDQFLGLRPGDGVGEGDVRAGDGGGAGAAVGLEDVAVEDDRVLAEGLVVDDGAQGAADEAADLVRPAADLAADGFAVAAGVGGAGEHRVFGGDPALAAALAPAGDALRDGGGAEDLRVAEGDEDGALGVLAPPAFDGDGAELFGGAAVDT
bacteria_321899		6308.98	3272.79		0.946948	0.178942		1.21031e-07	1.11561e-06		Actinobacteria		Transcriptional regulator		Transcriptional regulatory protein LiaR		MLRLLGLGRSNRQIGEELFISGKTASVHVSNILAKLGAASRSEAVAIAYRERLLEPAAGASD
bacteria_170025		19638.2	10178.8		0.948066	0.189548		5.68191e-07	4.44638e-06		Actinobacteria	ko:K03088	Belongs to the sigma-70 factor family. ECF subfamily	sigE	hypothetical protein		MATPGKAVTDLPSPKSLNAEGPSVCFRGHVQDVGWQPWKCDTEPDGAAEAGTTGQNLRLDQEVFVRVFRSLSTYTPGTFEGWLHRITTNLFLDMVRRKQRIRFDALGEDAAERLPSREPSPQQIFNDAHFDADVQQALDTLAPEFRAAVVLCDIEGLSYEEIAATLGVKLGTVRSRIHRGRSQLRKALAHRSPEARAERRSFMARVPALGGGGASA
bacteria_103186		56343.3	29190.3		0.948729	0.17989		1.33528e-07	1.21948e-06		Actinobacteria	ko:K01681	Catalyzes the isomerization of citrate to isocitrate via cis-aconitate	acnA	Aconitate hydratase A		MTALETSSGSRNFEGRINPDVKMNYLASPPLVVAYALAGSMKVDITKDALGTDQDGKPVFLADIWPSEAEVNDVVANAIGEDMFNKSYADVFAGDAQWQALPIPTGNTFEWDAESTYVRKPPYFEGMTMETTPVSDITGARVLAKLGDSVTTDHISPAGAIKADTPAGKYLTEHGVERRDFNSYGSRRGNHEVMIRGTFANIRLRNQIAPGTEGGYTRDFTQDGGPVSFIYDASRNYIEQGTPLAILAGKEYGSGSSRDWAAKGTALLGVKAVIAESYERIHRSNLIGMGVLPLQFPEGATAESLGLTGEETFSFTCVEELNNGTTPRTVKVTTDTGVAWCRC
bacteria_183825		50601.7	26165.4		0.951496	0.143265		3.10468e-11	7.32439e-10		Actinobacteria	ko:K00024	Catalyzes the reversible oxidation of malate to oxaloacetate	mdh	Malate dehydrogenase		MTRTPVNVTVTGAAGQIGYALLFRIASGQLLGADVPVKLRLLEITPALKAAEGTAMELDDCAFPLLQGIDITDDPNVAFDGTNVGLLVGARPRTKGMERGDLLSANGGIFKPQGKAINDNAADDVKILVVGNPANTNALIAQAAAPDVPAERFTAMTRLDHNRALTQLAKKTGSTVADIKRLTIWGNHSATQYPDIFHATVAGKNAAETVNDEKWLAEEFIPTVAKRGAAIIEARGASSAASAANAAIDHVRDWVLGTNGKWTTMGVPSDGSYGIPEGIVFGYPVTTENGEYTIVQGLPIDQFSQERINLTLNELNEERAGVAHLLGK
bacteria_321295		31956.5	16483.6		0.955032	0.166979		1.06848e-08	1.28e-07		Actinobacteria	ko:K01596,ko:K01610	Catalyzes the conversion of oxaloacetate (OAA) to phosphoenolpyruvate (PEP), the rate-limiting step in the metabolic pathway that produces glucose from lactate and other precursors derived from the citric acid cycle	pckG	Phosphoenolpyruvate carboxykinase [GTP]		MTESFDWNHGVFLGANVASEKTAAAEGKVGELRRDPFAMLPFCGYNMGDYMGHWVDVAKDKDQSKLPKIYYVNWFRKNDAGKFVWPGFGENSRVLKWIVERLEGRAEGVETPIGILPAKDALDTKGLDLADSDLEFLLTVDKEVWRDEASLIPEHLNTFGDHTPKELWDEYRALVQRLG
bacteria_187734		12992.8	6695.68		0.956407	0.184118		2.05242e-07	1.77776e-06		Actinobacteria	ko:K02946	Involved in the binding of tRNA to the ribosomes	rpsJ	30S ribosomal protein S10		MAGQKIRIRLKAYDHEVIDSSAKKIVETVTRTGASVAGPVPLPTEKNVYCVIKSPHKYKDSREHFEMRTHKRLIDILDPTPKTVDSLMRLDLPAGVDIEIKL
bacteria_149736		8831.04	4541.97		0.959293	0.259019		0.00021259	0.000868146		Actinobacteria	ko:K01689	Catalyzes the reversible conversion of 2- phosphoglycerate into phosphoenolpyruvate. It is essential for the degradation of carbohydrates via glycolysis	eno	Enolase		MAQRNGFKCMMSHRSGETEDVTIADLAVAVNCGQIKTGAPARSDRVAKYNQLLRIEEILDDAAVYAGRSAFPRFRSANH
bacteria_218559		25805	13270.2		0.959458	0.18294		1.56563e-07	1.41003e-06		Actinobacteria	ko:K06966	Belongs to the LOG family	fmt2	hypothetical protein		MATGNPEGKKQPPEEQRLGPVLRRRGQVTASTTDQRLLDAGGPSDWVHTDPWRVLRIQSEFIEGFGTLAELPPAISVFGSARTPADSPEYEAGVRLGRGLVEAGFAVITGGGPGAMEAANKGACEANGTSVGLGIELPFEQGLNPYVDIGLNFRYFFVRKMMFVKYAQGFVVLPGGLGTLDELFEALTLVQTQKVTRFPIVLFGSEYWGGLVDWLKNTLIAQGKASEKDLLLFHMTDDVDEAVALVSKEAGR
bacteria_35688		43221.4	22212		0.960399	0.153854		4.31282e-10	7.58285e-09		Actinobacteria	ko:K00951,ko:K01139	In eubacteria ppGpp (guanosine 3'-diphosphate 5-' diphosphate) is a mediator of the stringent response that coordinates a variety of cellular activities in response to changes in nutritional abundance	relA	hypothetical protein		MTVAERAPKRDEYLAIVTDEVQSDLRAARIKATVTGRPKHYYSVYQKMIVRGRDFAEIYDLVGIRVLVDTVRDCYAALGTVHARWNPVPGRFKDYIAMPKFNMYQSLHTTVIGPNGKPVELQIRTFDMHRRAEYGIAAHWKYKQEAVAGASKVRSDQPRTTGKDDHLNDMAWLRQLLDWQKETEDPGEFLESLRFDLSRNEVFVFTPKGDVIALPAGATPVDFSYAVHTEVGHRTIGARVNGRLVPLESTLDNGDLVEVFTSKAAGAGPSRDWLGFVKSPRARNKIRAWFSKERRDEAIEQGKDAIVRAMRKQNLPIQRIARAMASLPCSIASSRRSLENQALILLRARGDLTKPSQSREGPAPAALEVKTSTKSPLSRVDSSGTSRPLTRAPMVRWPT…
bacteria_03838		23453	12038.7		0.96208	0.158506		1.28166e-09	1.954e-08		Actinobacteria	ko:K01681	Catalyzes the isomerization of citrate to isocitrate via cis-aconitate	acnA	Aconitate hydratase A		MNYLASPPLVVAYALAGSMKVDITKDALGIDQDGNPVFLKDIWPSEAEVNDVVANAIGEDMFNKSYQDVFAGDAQWQALPIPTGNTFEWDAESTYVRKPPYFEGMTMETTPVSDITGARVLAKLGDSVTTDHISPAGAIKADTPAGKYLTEHGVERRDFNSYGSRRGNHEVMIRGTFANIRLRNQIAPGTDGGYTRDFTQDGGPVSFIYDASRN
bacteria_325726		63267.1	32448.6		0.96328	0.140158		6.29456e-12	1.72709e-10		Actinobacteria	ko:K00031	Isocitrate dehydrogenase	icd	Isocitrate dehydrogenase [NADP]		MQVGDALVGVDHREGRALGELGVEGRLDLGTLGKGLESLPEGEAVKASFEAEIAEGPALAMVDSDKGISNLHVPSDVIVDASMPAMIRTSGHMWGPDGQEADTLAVLPDSSYAGVYQAVIEDCRANGAYDPSTMGSVPNVGLMAQKAEEYGSHDKTFEIRTTGTVRLVDQNGNAVIEQTVSAGDIFRACQTKDAPIRDWVKLAVTRARATGNPAVFWLDETRAHDANLIAKVEQYLTEHDTEGLDIRVLNPVEATKLSVERIRRGEDTISVTGNVLRDYLTDLFPILELGTSAKMLSVVPLMAGGGLFETGAGGSAPKHVQQLVKENYLRWDSLGEFFALVPSLEQYADFTGNSRAKVLADTLDRATATFLNEDKSPTRRVGGIDNRGSHFYLSLYWAQ…
bacteria_107879		28592.6	14627.1		0.966982	0.184383		1.56787e-07	1.41132e-06		Actinobacteria		protein conserved in bacteria		hypothetical protein		MTTPPNDALPGRPPVVDLATWQAARDELLVREKAHTREGDAIAAARRRLPMVEFDGTVEVVGPDGPVPFLDLFQGRDELVVYKHMWYDGAPHQGQCEGCTTTAWHLKDAVYLNARGVSFAIVTTGPWDEVAPYVEFMGYTQPWYSVRGVDEPVGGDMGYLTCFLRDGDRAFLTYSTTGRGNERVSGSLGLLDMTPYGRGETWEDNPEGWPKGLGACWTWRSDAEGNPTWGPTGRPVPQWTRPGATPVQTLGRRGHHH
bacteria_360743		55771.5	28506		0.968251	0.110723		2.23326e-18	5.97904e-16		Actinobacteria				hypothetical protein		MLPGQLRDVHQTVDTAEVHERTEVDDGGDDAGAHLALLQGGEERLANLGLRLLKPRAAGQDHVVAVLVQLNDLRLELAADVRLQVADTAHLDQGRRQEATEADVEDESTLDDLDDGAGDDAVLVLDLLDRAPGPLVLSALLGQDQAAFFVLLLENEGLDVFADLHDVSRIDIVLDRKLTRGDDALGLVADIEKDLVSIDLDDGALDDVAVVEVLDGLVDRCEEVFLGPDVVDRYLRGARGGLSAGRHVWNCSERGQNVDVADARQALFRIKPRNYDIDVTEREPAPSEARASPQRSDQHMRPRACGQSNRPTTRQ
bacteria_169706		68856.5	35160.2		0.96963	0.158497		9.49588e-10	1.50351e-08		Actinobacteria	ko:K01868	Catalyzes the attachment of threonine to tRNA(Thr) in a two-step reaction L-threonine is first activated by ATP to form Thr-AMP and then transferred to the acceptor end of tRNA(Thr)	thrS	Threonine--tRNA ligase		MSDVRVIIQRDSERDERVVTTGTTAADLFTGERTIVAARVAGELRDLAYEVQDGEEVEPVEISSEDGLNILRHSTAHVMAQAVQELFPEAKLGIGPPVKDGFYYDFDVEKPFTPEDLKAIEKKMQEIQKRGQRFSRRVVTDEAAREELASEPYKLELIGIKGSASTDDGADVEVGGGELTIYDNLDAKTGDLCWKDLCRGPHLPSTRNIPAFKLMRNAAAYWRGSEKNPMLQRIYGTAWPSKEELKAHLDFLAEAEKRDHRKLGSELDLFSIPEQIGSGLAVFHPKGGIIRRVMEDYSRRRHEEEGYEFVYTPHATKGKLFEQSGHLDWYADGMYPPMQLDEGVDYYLKPMNCPMHNLIFDARGRSYRELPLRLFEFGTVYRYEKSGVVHGLTRARGFT…
bacteria_303977		27567.6	14075.2		0.969792	0.156816		6.23875e-10	1.04393e-08		Actinobacteria	ko:K00927,ko:K01803	Involved in the gluconeogenesis. Catalyzes stereospecifically the conversion of dihydroxyacetone phosphate (DHAP) to D-glyceraldehyde-3-phosphate (G3P)	tpiA	Triosephosphate isomerase		MTTRTPLMAGNWKMNLNHLEAIAHVQKLAFALADKDYEAVEVAVLPPFTDLRSVQTLVDGDKLKIKYGAQDISAHDSGAYTGEISGSMLAKLKCTYVAIGHSERRQYHNETDELVNAKVKAAYKHGLTPILCVGEELEVREAGNHVTHTLAQVEGGLKDLPAEQAETIVIAYEPVWAIGTGKVCGADDAQEVCAAIRGKIAELYTQELADQVRIQYGGSVKAGNVAEIMAKADIDGALVGGASLDADEFVKIVRFRDQ
bacteria_167247		15852.7	8072.22		0.973631	0.218669		8.48664e-06	4.98203e-05		Actinobacteria	ko:K01733	Catalyzes the gamma-elimination of phosphate from L- phosphohomoserine and the beta-addition of water to produce L- threonine	thrC	Threonine synthase		MTHQWRGIIEEYRDRLPVSDSTQVVTLREGGTPLVPAQVLSERTGCEVHLKVEGANPTGSFKDRGMTMAITRAKEEGAKAVICASTGNTSASAAAYAVRAQMVSAVLVPQGKIALGKMGQALIHGAKILQVDGNFDVCLTLARHSACSATSSANVA
bacteria_356067		23599.9	12008		0.974758	0.246809		7.83357e-05	0.000359344		Actinobacteria	ko:K00330	NDH-1 shuttles electrons from NADH, via FMN and iron- sulfur (Fe-S) centers, to quinones in the respiratory chain. The immediate electron acceptor for the enzyme in this species is believed to be a menaquinone. Couples the redox reaction to proton translocation (for every two electrons transferred, four hydrogen ions are translocated across the cytoplasmic membrane), and thus conserves the redox …	nuoA	NADH-quinone oxidoreductase subunit A		MNAYAPILVLGALGAGFAIFSVVMATLIGPKRYNRAKLEAYECGIEPTPTPAGGGRFPIKYYLTAMLFIVFDIEIVFLYPWAVTFDALGVFGLVEMLLFVLTVFVAYAYVWRRGGLEWD
bacteria_05522		50869.6	25855.6		0.976305	0.169355		8.17345e-09	1.01067e-07		Actinobacteria	ko:K01915	glutamine synthetase	glnII	Glutamine synthetase		MTFKAEYIWIDGTQPTAKLRSKTKIMADDAKGAELPIWGFDGSSTNQAEGHSSDRVLKPVFSCPDPIRGGDDILVLCEVLNIDMTPHESNTRAALTEVAEKFASQEPIFGIEQEYTFFKDGYPLGFPKGGFPAPQGGYYCGVGADEIFGRDVVEAHLENCLKAGLAISGINAEVMPGQWEFQVGPVSPLEVSDHLWVARWLLYRTAEDFGIAATLDPKPVKGDWNGAGAHTNFSTKAMREGYDAIITACESLGEGSKPLDHVKNYGAGIDDRLTGLHETAPWNEYSYGVSNRGASVRIPWQVEKDGKGYIEDRRPNANVDPYLVTRLIVDTCCSALEKAGQV
bacteria_127252		36672.1	18621.4		0.977695	0.136357		7.49459e-13	2.73051e-11		Actinobacteria		response regulator, receiver		Sensory transduction protein regX3		MTRVLVVEDEESFSDALSYMLRKEGFEVAVATTGPDGLDEFDRNGADLVLLDLMLPGLPGTEVCRQLRGRSNVPVIMVTAKDSEIDKVVGLEIGADDYVTKPFSSRELVARIRAVLRRRGEPEEVTPAALEAGPVRMDVDRHVVTVSGSKVDLPLKEFDLLEMLLRNAGRVLTRMQLIDRVWGADYVGDTKTLDVHVKRLRAKIEPDPGAPRYLVTVRGLGYKFEP
bacteria_299983		65470	33197.2		0.979768	0.153125		1.56912e-10	3.10139e-09		Actinobacteria	ko:K03702,ko:K08999	damaged site, the DNA wraps around one UvrB monomer. DNA wrap is dependent on ATP binding by UvrB and probably causes local melting of the DNA helix, facilitating insertion of UvrB beta-hairpin between the DNA strands. Then UvrB probes one DNA strand for the presence of a lesion. If a lesion is found the UvrA subunits dissociate and the UvrB-DNA preincision complex is formed. This complex is subs…	uvrB	UvrABC system protein B		MVASVSCIYGLGTPQEYVDRMVPLKVGDELDRDQLLRRFVDIQYTRNDLAFTRGTFRVRGDTIEIFPVYEELAVRIEMFGDEIEALSTLHPLTGEIISEDQQLYIFPATHYVAGPERLERAANDIEKELGERLAELEKQGKLLEAQRLRMRTTYDLEMLRQIGSCSGVENYSMHFDGRSPGSPPNTLLDYFPDDFLLVIDESHVTVPQIGAMYEGDASRKRTLVDHGFRLPSALDNRPLKWEEFQERIGQTVYLSATPGKYELSRGDGVVEQIIRPTGLIDPEVVVKPTEGQIDDLVHEIRQRTEKDERVLVTTLTKKMAEDLTDYFLERNVRVRSRK
bacteria_184233		27449.4	13913.9		0.980235	0.164724		2.66854e-09	3.68096e-08		Actinobacteria	ko:K01733	Catalyzes the gamma-elimination of phosphate from L- phosphohomoserine and the beta-addition of water to produce L- threonine	thrC	Threonine synthase		MLPVEAQMTAWAAAYAVRAGMVCAVLVPQGKIALGKMGQALIHGAKILQVDGNFDDCLTLARSLSDNYPVALVNSVNPVRIEGQKTAAFEIVDMLGDAPDIHVLPVGNAGNITAYWKGYKEYAADGVAARTPRMWGFQASGSAPIVRGEIVKDPSTIATAIRIGNPASWQYALAAKEESGGFIDEVTDREILRAYRMLAAQEGVFVEPASAASVAGLLKAAEQGKVDPGQRIVCTVTGNGLKDPDWAVAGAPQPVTVPVDAATAAERLGLA
bacteria_03701		64303.9	32538.8		0.982722	0.12978		3.66883e-14	1.92369e-12		Actinobacteria	ko:K03694,ko:K03695	Part of a stress-induced multi-chaperone system, it is involved in the recovery of the cell from heat-induced damage, in cooperation with DnaK, DnaJ and GrpE	clpB	Chaperone protein ClpB		MSSASSFLFLRLSGTSPLMMRNAKPSAMAVLPTPGSPMRTGLFFVRRLSTCTTRRIVKGDVPESLKDKRLVSLDLSAMVAGAKYRGEFEERLKTVLAEIKDSDGQIITFIDELHTVVGAGAGGDSSMDAGNMLKPMLARGELRMVGATTLDEYRERIEKDPALERRFQQVLVAEPTVEDTIAILRGLKGRYEAHHKVQIADSALVAAAALSDRYITSRFLPDKAIDLVDEAASRLRMEIDSSPLEIDELQRGVDRLKMEELALVKETDPASRERLERLRRDLADKEEELRGLTARGEKEKQSLNRVGELKEKLDELRGQAERAQRDGDFDTASKLLYGEIPTLERDLEAASEAEEEVSKDTMVKEEVGADDIADTVAAWTGIPAGRLLEGETQKLLRME…
bacteria_137394		46736.5	23538.5		0.989499	0.200408		7.91612e-07	5.98024e-06		Actinobacteria				hypothetical protein		MTRGVDEGDATLFFVDDGRDLVRTDVLRDTAGLARDDVRLADGVEEAGLTVVDVTHDGHDRRTRDEELLATLVLTELDVEGLEQLAVLLLGADDLEDEVHLVREEPQRLVGDGLRGGDHLAEVHHHADERRRVGADLLGEVGQGSTTRQADGLSVAARQHDAADRRGLHGLVLLAPLPLRLATTTRGTTGTTEGALRATTGTRTTGTTAEAGTTAAATTGTTRTAGETAATATRTTGTTGDTAATATGTTATGATGTTGTTATATGTAATRATAGTRAARSGTLRHHAGVGTVAAGAAAGTRSATGTTLRTGHAARAVTVPTPA
bacteria_294840		19401.6	9768.12		0.989978	0.338399		0.00343932	0.00911547		Actinobacteria	ko:K00800	Belongs to the short-chain dehydrogenases reductases (SDR) family		3-phenylpropionate-dihydrodiol/cinnamic acid-dihydrodiol dehydrogenase		MTFIDLDVTDDDSAAAAVGQVIDRFGRIDVLVNNAGFGSGGAAEESSIAQDQRVFDVNVFGVIRMTKAVLPHMRAQRGGRIVNISSIVGFIPMPYMAVYAASKHAVEGYSESLDHEVREHGVRVLLVEPAWTATAFEANSVQPDHPLPVYARQRRVFEESMAAAVKDGDDPAVVAKAVVAAATDAKPKLRYAAGQTGRVHVLRRLAPTRIFDQQIRKLNRLPA
bacteria_299672		21257	10699.2		0.990467	0.183041		6.26157e-08	6.20159e-07		Actinobacteria	ko:K01507	Catalyzes the hydrolysis of inorganic pyrophosphate (PPi) forming two phosphate ions	ppa	Inorganic pyrophosphatase		MLVDEPTFPGCLIRCRAIGMFRMTDEAGGDDKLLCVPSTDPRVEHLRDIHHVSEFDRLEIQHFFEVYKDLEPGKSVEGADWVGRTDAEAEIERSYKRFKDQGGH
bacteria_173236		22687.1	11417.3		0.990637	0.176719		2.07411e-08	2.28917e-07		Actinobacteria	ko:K03790	Acetyltransferases including N-acetylases of ribosomal proteins		Spermidine N(1)-acetyltransferase		MPTPTLSTARLRLRPFTDADADALFALHSNAVALRYWDSPPWTDRARAERFIAMCRTMADEGTGARVAIDRASDGAFVGWCVLAEWNPDYRSASLGYVLDEAMWGHGYATEAAHALLQWAFDTLDLNRIQAETDTRNVASARVLEKIGFVREGTLREDCVVNGEVSDSWVFGLIRREWRPSAVPIPAHAKRR
bacteria_43984		19519.1	9818.3		0.991289	0.223903		9.54143e-06	5.53867e-05		Actinobacteria		ABC transporter	yjjK	Energy-dependent translational throttle protein EttA		MWAVVSDELDYINVGQVEMPSRAYVSAFGFKGPDQQKPAGVLSGGERNRLNLALTLKQGGNLLLLDEPTNDLDVETLSSLENALLEFPGAAVVVSHDRWFLDRVATHILAYEGDSRWFWFEGNFESYEKNKIERLGADAARPHRATYKKLTRD
bacteria_313819		29859.1	15019.6		0.99129	0.171777		7.88975e-09	9.78329e-08		Actinobacteria	ko:K00548	Methionine synthase	metH	Methionine synthase		MGPGTKLPTLGHAPYEVLRDGYEANAAGLIAGGADALLVETTQDLLQTKAALIAARLAMTAAGVNLPLICQVTVETTGTMLLGSEIGAALTALEPLGIDMIGLNCATGPSEMSEHLRYLAQHSRIPLSCMPNAGLPVLTKDGAHYPLTPGELADAHEVFTREYGLSLVGGCCGTTPEHLRQLVERVGGQDLHPRTARPEPGAASLYQTVPFRQDTSYLAIGERTNANGSKKFRDAMLEGRWDDCVEMARDQIREGAHLLDLCVDYVGRDGAADMTAMASRLATASTLPIIIDSTEPEVIRAGLEQLGGR
bacteria_361655		23531.6	11833.3		0.99172	0.178165		2.60218e-08	2.80458e-07		Actinobacteria				hypothetical protein		MDPAEDADPRGKRDVRDFALWKGYTEGTPRTASWPTPWGDGRPGGRLRRALGVALPEREVARVALAARIRVLGGLHVVDPLVRQLAVRRPGLHVEVDVAGAVRSDVRVPALDQLGDHLQHLRDVPGRARLVRRRAAAEHVVRPVQLALELVGVRPPRHVPLGRFGQDLVVDVGHVRDHGDLVARALQPAPQDVEDDLLVDVPDMRGTLHRQPTVVDPDLARMDRHEIPHCCRCGVVQAKRHRSRVTGSGTPP
bacteria_38862		62436.9	31370.7		0.992966	0.196648		4.43067e-07	3.55218e-06		Actinobacteria	ko:K03070	Part of the Sec protein translocase complex. Interacts with the SecYEG preprotein conducting channel. Has a central role in coupling the hydrolysis of ATP to the transfer of proteins into and across the cell membrane, serving as an ATP-driven molecular motor driving the stepwise translocation of polypeptide chains across the membrane	secA	Protein translocase subunit SecA		MGYLNNAIKAKELFKKDKDYVVMDGEVMIVDEHTGRILAGRRYNEGMHQAIEAKEGVDIKDENQTLATITLQNFFRLYKRRNHDGKEQPGLCGMTGTAMTEAAEFHQIYKLGVVPIPTNRPMVRKDQSDLIYRTEVAKFEAVVDDIAEKHEKGQPILVGTTSVEKSEYLSQQLSKRGIQHEVLNAKHHEREASIVAQAGRRGAVTVATNMAGRGTDIKLGGNPDDLAEAELRQRGLDPEEHIEEWAAALPAALEKAEQAVKAEFDEVKELGGLYVLGTERHESRRIDNQLRGRSGRQGDPGESRFYLSLGDDLMRLFKAQMVERVMSMANVPDDVPIENKMVTRAIASAQSQVEQQNFETRKNVLKYDEVLNRQREVIYGERRRVLEGEDLQEQIHHFM…
bacteria_344873		50383	25281.9		0.994821	0.136551		3.20788e-13	1.28826e-11		Actinobacteria	ko:K02031,ko:K02032	ATPase activity		Glutathione import ATP-binding protein GsiA		MSLVHVTDLTVEFGDLRAVDGLSFRLEQGAALALVGESGSGKSTVASALLGLHRGTGARVGGSVEVAGVDVQQAPGDDLRRLRGGKAAMVFQDPLSSLDPYYAIGDQIAEVYRVHTRVSRRAARARAVEVLDRVGIPDAVRRSRARPHEFSGGMRQRALIAMALACEPDLLIADEPTTALDVTVQAQILDLLHTLRQETGMGLLLVTHDVGVAAESVDDVLVMRHGRAVEQGPVGAVLGAPAEAYTRELLAAVPRVDAPRTPSGASGEVVLEAKSLRREFGRGKKAFAAVDDVSLTIHRGETLGVVGESGSGKTTLGRMLVGLLEPTAGEVRHDGHARVGVNPTVQMVFQDPVSSLNPRRSVGESIADPLRARGERDEKRIRGRVTELLERVGLEGAHY…
bacteria_356068		18468.8	9254.29		0.996825	0.260176		0.000127441	0.000547903		Actinobacteria	ko:K00331	NDH-1 shuttles electrons from NADH, via FMN and iron- sulfur (Fe-S) centers, to quinones in the respiratory chain. The immediate electron acceptor for the enzyme in this species is believed to be a menaquinone. Couples the redox reaction to proton translocation (for every two electrons transferred, four hydrogen ions are translocated across the cytoplasmic membrane), and thus conserves the redox …	nuoB	NADH-quinone oxidoreductase subunit B		MGLEEKLPSGFLLTTVEQAAGWVRKASVFPATFGLACCAIEMMTTGAGRYDLARFGMEVFRGSPRQADLMIVAGRVSQKMAPVLRQVYDQMPNPKWVISMGVCASSGGMFNNYAIVQGVDHIVPVDIYLPGCPPLPEMLMDAILKLHQKIQTSKLGVNAEEAAREAEEAGR
bacteria_201649		39852.1	19952.9		0.998016	0.173249		8.38176e-09	1.03281e-07		Actinobacteria	ko:K01736	Catalyzes the anti-1,4-elimination of the C-3 phosphate and the C-6 proR hydrogen from 5-enolpyruvylshikimate-3-phosphate (EPSP) to yield chorismate, which is the branch point compound that serves as the starting substrate for the three terminal pathways of aromatic amino acid biosynthesis. This reaction introduces a second double bond into the aromatic ring system	aroC	Chorismate synthase		MSRLRWLTAGESHGPALVATLEGLPAGVPITTEMVADHLARRRLGYGRGARMKFERDEVTFLGGVRHGLTMGSPVAVLVGNTEWPKWEQVMAADPVDPEILAGLARNAPLTRPRPGHADLAGMQKYGFDEARPILERASARETAARVALGAVARSYLKETAGIEIVSHVVELAAAKAPYGVYPTPADVEKLDADPVRCLDADASKAMVAEIDQAHKDGDTLGGVVEVLAYDVPVGLGSHVHWDRRLDARLAAALMGIQAIKGVEVGDGFDLARVPGSKAHDEILATGDGIRRASGRSGGTEGGLTTGELLRVRAAMKPIATVPRALQTVDVATGEATQAHHQRSDVCAVPAAGIVAEAMVALVLADAVAEKFGGDSVPETRRNVRSYLDNLHIR
bacteria_321092		10508	5248.74		1.00133	0.2594		0.00011331	0.000494854		Actinobacteria		Transcription regulator of the Arc MetJ class		hypothetical protein		MIFKRIGNGRPYPDHGRESTRQWADVAPRPVRLDQLVTTKGQLDLETLLAEDSTFYGDLFAHVVKWQGDLYLEDGLHRAVRAALQQRQVLHARVLELG
bacteria_78612		33441.1	16690.8		1.0026	0.150454		2.66803e-11	6.41352e-10		Actinobacteria		belongs to the sigma-70 factor family	sig12	hypothetical protein		MATSPGWSSRTLDTVRLAQRISRAKRTVSGVRFDQPGDVATVLRVLYLVFNEGYSGDVDLAAEAIRLTRQLAAAIDHPEVAGLLALMLLHHARRASRTAPDGGLVPLAEQDRTRWDTAAIAEGVEILQAALARDRLGEFQAQAAIAALHADAPTTGETDWVQIVEWYDELARLTDNPVVGLNRAVAVGEADGPRAGLAALAALDDELPRHAATAV
bacteria_142939		19748.9	9824.71		1.00725	0.153939		6.02242e-11	1.32523e-09		Actinobacteria	ko:K03438	Specifically methylates the N4 position of cytidine in position 1402 (C1402) of 16S rRNA	rsmH	Ribosomal RNA small subunit methyltransferase H		MQLDEADRGFAYAQDAPLDMRMDQTTGMSAAEVLNTYPPGELVRILRAYGEEKQAKRIVSAIVRERGKEPFSNSARLVELIRDALPQAAKRTGGNPAKRTFQALRIEVNGELSVLEQAIPAAVKSLDVGGRIAVLSYHSLEDRLVKQVFAAGAANTAPPGLPVVPERYQPRLKLLTRGAELPTEEEVAENRRAAPARLRGAQRIREDAE
bacteria_114367		33660.2	16735.5		1.00811	0.139377		4.72428e-13	1.83468e-11		Actinobacteria		Diguanylate cyclase		hypothetical protein		MAIAEMGGDQHGRILRTNDALCRLLGRPASAMRRYAFSDLVHPEDIGTLLRTSAEGGRAELRLGRRDGTYVWVSLRNSVVADAADGPRFLLTHVEDIEERKRREVQLAHRASHDSLTGLPNSAELRSRLSSRLCQQRSTHTAALESIDTAFGHPAFDANGHGFDFRPVGAEAFDTFDHHVHTVAPEGERDDGTKGLAVLFCDLDGFKSINDRFGHNAGDAVLIEVARRLSQCVRDGDTVARLGGDEFVILADGLGKADAADLAVRLRSEIIQPIRAEGRAVRVGASFGIGLAHCGMTADEVLKSADERMYVEKRSRPKQHRRAG
bacteria_20742		16904.6	8399.22		1.00908	0.277919		0.000282492	0.00110925		Actinobacteria	ko:K02871	This protein is one of the early assembly proteins of the 50S ribosomal subunit, although it is not seen to bind rRNA by itself. It is important during the early stages of 50S assembly	rplM	50S ribosomal protein L13		MPTYSPKPGDVTRAWHVIDAEDVVLGRLATEVATLLRGKHKPTYAPHVDTGDFVIIVNAEKVALTGNKREQKFAYRHSGYPGGLSKRSFGELLDTKPERLVEKVVKGMLPKNKLGRAMGKKLKVYAGPQHPHGAQQPQTREINKIAQVVK
bacteria_230018		13896	6882.74		1.01347	0.183074		3.09667e-08	3.28836e-07		Actinobacteria				hypothetical protein		MLDREFAARDDTFGLVTDVEQDLVPVDLHDDAVDDVAVVEVLDRLVDRGEEGFLVTDVVDRYLRSGRGGLGAARHVGKGSGTDSES
bacteria_227644		43100.7	21312		1.01602	0.135626		6.81738e-14	3.25576e-12		Actinobacteria	ko:K00239	succinate dehydrogenase	sdhA	Succinate dehydrogenase flavoprotein subunit		MQIHKYDTVIVGAGGAGMRAAIESTQRSRTAVLTKLYPTRSHTGAAQGGMCAALANVEEDNWEWHTFDTVKGGDYLVDQDAAEIMCKEAIDAVLDLEKMGLPFSRTEQGRIDQRRFGGHSRNHGEAPVRRSCYAADRTGHMILQTLFQNCVKHGVEFFNEFYVLDLLINDGKTAGVVAYELATGEIHVFQAKSVVFASGGTGKFFKVTSNAHTLTGDGQALVYRRGLPLEDMEFFQFHPTGIRRMGILLTEGARVEGGILRNKDGERFMERYAPVL
bacteria_44267		30005	14827.3		1.01696	0.200817		4.10284e-07	3.30133e-06		Actinobacteria		transcriptional regulator		HTH-type transcriptional regulator BetI		MTAIEQTEAARPRGTRLPRRARRNQLLGAAQEVFVAQGYHSAAMDDIAERAGVSKPVLYQHFPGKLDLYLALLDQHCESLIQAVRGALASTSDNKQRVRATMDAYFAYVEDDGGAFRLVFESDLTNEPAVRERVDKVTTECAEAICEVIAEDTGLSRAESMLLASGLGGLAQVVARSWLHSDRSVPRDQAVQLLASLAWRGIAGFPLHGTDQH
bacteria_44165		14917.8	7371.28		1.01698	0.232651		1.23536e-05	6.97854e-05		Actinobacteria		glyoxalase bleomycin resistance protein dioxygenase		hypothetical protein		MPATGPDFISLQARDLDASQAFYEQYLGLVRSQTGPPHAVVFETKPIAFALRDIVPGTDLASAAQPGIGAAIWLHATDVQAIHDALVADGHTIVSAPIDGPFGRTFTFADPDGYQITLHDRA
bacteria_267598		99963	49394.3		1.01704	0.161543		3.05871e-10	5.5834e-09		Actinobacteria	ko:K01006,ko:K22424	Belongs to the PEP-utilizing enzyme family	ppdK	Pyruvate, phosphate dikinase		MSENKEPHVAKFVYDFTEGNKDLKDLLGGKGANLAEMTNLGLPVPPGFTITTEACKVYLDSGEEPAALRDEVSAHLDALEQRMAKKLGQADDPLLVSVRSGAKFSMPGMMDTVLNIGLSDKSVQGLAKQAGDDRFAWDSYRRLIQMFGKTVLGVDGDLFEEALEKAKEVKKVTVDTDLEAADLKKLVTAFKKIVKKEAGRDFPQDPREQMDLAIHAVFDSWNTDRAKLYRRQERIPGDLGTAVNVCSMVFGNLGPDSGTGVAFTRDPASGHQGVYGDYLQNAQGEDVVAGIRNTVPLAELEQIDKKSYDQLMQIMETLENHYKDLCDIEFTIERGQLWMLQTRVGKRTAGAAFRIATQLVDQGLIDEAEALQRVTGAQLAQLMFPRFDENTKVAQVGRG…
bacteria_33133		94730.1	46778		1.01798	0.292335		0.000497226	0.00180484		Actinobacteria				hypothetical protein		MHPEDLLAALQVRHGHRDLTVEAAGTQQRGVEDVGTVRRRDEDDPAARVEAVHLDEQLVQRLLALVVATAETGTTVAAHRVDLVDEDDARSVLLGLLEQVTDARGTDTDEHLDEVRAGDRVERHTGLTGDGPGEQRLTGSRRAVQQHALRDLGAERLVAAGVLEEVLDLLELLDCLVGTGDVGERRLGHVLGQLFGLGLAEVQNAVAAALSVVHHPHEQQQQQAERHEVDQDLHQDGLLADLGLDDRLVAGLVEDVEDLVRRAGRELRDQAVAALEGGAVGEGESESLLLVLDRGFLDLAIPHQLQCLGRLDLVVTP
bacteria_242587		48055.8	23728.3		1.01805	0.143284		1.20234e-12	4.04674e-11		Actinobacteria				hypothetical protein		MLVDRLLDEGLGLRVAQLGLGLALELRLAQLHRDDRRQTLADVVAREVVVLLAQQLLVARVLVDQVGQRRTEALLVRTALMRVDDVGEGVHTLAVTAVPLHGDLEGQALVLVLRLQVDDGRVHRVSLAGVEVLHEVDDAALVVVRDGLDLVLLVRTRLVRTGGGLRGLALVSEFDRQTLVEERHLLEAPRERLEGVLGGLEDVAVGPEGDRRAGLLDGLVLDERRRGDAHLVVLRPAVAVGPDLDGDLARQGVDDGDADAVQTAGDRVAAAAELAARVQHGQHDLECRLALGGDDADRDATAVVDDAYAAVGEDRDVDGVRVTGQRLVDRVVDDLVHKVVQSALAGRADVHTGSLADRVQALEDGDGAGVVRGGDLAVRRGHHAVLAGVGGRDVLVGVA…
bacteria_80985		10960.3	5406.53		1.01946	0.227093		7.14937e-06	4.27655e-05		Actinobacteria	ko:K02965	Protein S19 forms a complex with S13 that binds strongly to the 16S ribosomal RNA	rpsS	30S ribosomal protein S19		MPRSLKKGPFVDDHLIKKVDVQNEAGTKNVIKTWSRRSMIIPAMLGHTIAVHDGRKHVPVFVTESMVGHKLGEFAPTRTFRGHEKDDRKSRRR
bacteria_143217		25259.7	12455.6		1.02002	0.194644		1.60169e-07	1.43811e-06		Actinobacteria		Belongs to the peptidase M16 family	pepR	hypothetical protein		MTSSSSTATARTSSEARAVARTQTLIKGTNGIGTVRKTTLPGGLRIVTETLPSVRSATFGIWAHVGSRDETPTLNGATHYLEHLLFKGTKRRSALDISSAIDAVGGEMNAFTAKEYTCYYARVLDTDLPLAIDVVCDMLTGSLILEEDVNVERGAILEEIAMT
bacteria_104282		24237.6	11924.7		1.02332	0.161962		2.64538e-10	4.91006e-09		Actinobacteria	ko:K03526	Converts 2C-methyl-D-erythritol 2,4-cyclodiphosphate (ME-2,4cPP) into 1-hydroxy-2-methyl-2-(E)-butenyl 4-diphosphate	ispG	4-hydroxy-3-methylbut-2-en-1-yl diphosphate synthase (flavodoxin)		MVEAYRQLAAQCDYPLHLGVTEAGPAFQGTIKSAVAFGALLSQGIGDTIRVSLSAPPVEEVKVGNQILESLNLKQRGLEIVSCPSCGRAQVDVYKLAEEVTAGLTGMEVPLRVAVMGCVVNGPGEAREADLGVASGNGKGQIFVKGEVIKTVPESKIVETLIEEAMKLAERMEQDGAATGVPGAKGTPAVTVG
bacteria_374604		55401.6	27244		1.02396	0.198748		2.57643e-07	2.18139e-06		Actinobacteria	ko:K00033	Catalyzes the oxidative decarboxylation of 6- phosphogluconate to ribulose 5-phosphate and CO(2), with concomitant reduction of NADP to NADPH	gnd	6-phosphogluconate dehydrogenase, NADP(+)-dependent, decarboxylating		MSNSAQIGVTGLAVMGRNLARNFARNGYTVALHNRTAARTHALVEEFGTEGDFVATDTAKEFVAALERPRRLVVMVKAGEPTDAVIQEFAPLLEPGDMIIDGGNAHFADTRRRERDLREQGIHFVGMGVSGGEEGALLGPSIMPGGPVESYDSLGPMLEKISAKAQDGTPCVSHVGPDGAGHFVKMVHNGIEYADMQLIGEAYQLLRDVAGYSPAQIADIFRTWNTGRLDSYLIEITAEVLSHVDAATGKPFVDVVVDQAEQKGTGRWTVQIALDLGVPVSGIAEAVFARSLSGHAALREASRGLAGPKATPLSESEAAAFADRVEQALYASKIVSYTQGFHEIAAGGAEYDWNIDLGAVSALWRGGCIIRAAFLDRIRAAYDARADLPSLLSDDTFAQ…
bacteria_329230		51402.8	25208.5		1.02792	0.150014		7.27395e-12	1.9702e-10		Actinobacteria	ko:K00758	phosphorylase	deoA	Thymidine phosphorylase		MAMDAISVIRTKRDRGELSDEQIDWVIDAYTRGEVADEQMSALAMAILLNGMNRREIARWTAAMIASGERMDFSSLSRPTADKHSTGGVGDKITLPLAPLVAACGAAVPQLSGRGLGHTGGTLDKLESIPGWRALLSNEEMLNVLDTTGAVICAAGDGLAPADKKLYALRDVTGTVEAIPLIASSIMSKKIAEGTGSLVLDVKVGTGAFMKTIEDARELASTMVGLGTDHGVKTVALLTDMSTPLGLTAGNALEVRESVEVLAGGGPSDVVELTLALAREMLDAAGVRDADPAKALADGSAMDVWRRMIAAQGGDPDAELPVAREQHVIKAPASGVLTRLDAYGIGVAAWRLGAGRARKEDPVQAGAGVELHAKPGDTVTQGQPLLTLHTDTPERFEYA…
bacteria_195691		40297.9	19748.1		1.02897	0.141688		3.80838e-13	1.50546e-11		Actinobacteria	ko:K03090	belongs to the sigma-70 factor family	sigB	RNA polymerase sigma factor SigF		MFVELRKLQDGSPEYAEMRNQLVRMHLPLVEHLARRFRNRGEPLDDLTQVATIGLIKSVDRFDPERGVEFSTYATPTVVGEIKRHFRDKGWAVRVPRRLQELRLALTTATAELSQQHGRSPTVHELAEKLAISEEEVLEGLESANAYSTLSLDVPDTDDESPAVADTLGAEDEALEGVEYRESLKPLLEDLPPREKRILLLRFFGNMTQSQIAQEVGISQMHVSRLLARTLAQLREKLLVEE
bacteria_110234		8934.92	4364.69		1.0337	0.24607		2.65919e-05	0.000137956		Actinobacteria		TIGRFAM DNA binding domain protein, excisionase family	bldC	hypothetical protein		MTARTPDAEPLLTPAEVATMFRVDPKTVTRWAKAGKLTSIRTLGGHRRYREAEVRALLAGIPQQRSEA
bacteria_85361		27179.4	13274.7		1.03379	0.20884		7.41517e-07	5.65011e-06		Actinobacteria	ko:K09811,ko:K09812	cell division ATP-binding protein FtsE	ftsE	Cell division ATP-binding protein FtsE		MGSSGSGKSTFLRLVLREERTSHGQVHVLGKDLARLSNWKVPQMRRQLGTVFQDFRLLPNKTVAENVAFAQEVIGKSKGEIRKSVPQVLDLVGLGGKEDRMPGELSGGEQQRVAIARAFVNRPKLLIADEPTGNLDPQTSVGIMKLLDRINRTGTTVLMATHDQNIVDQMRKRVIELEQGRLVRDQARGVYGYQH
bacteria_50314		22451.9	10947.1		1.03622	0.227699		5.34345e-06	3.3002e-05		Actinobacteria	ko:K02887	Binds directly to 23S ribosomal RNA and is necessary for the in vitro assembly process of the 50S ribosomal subunit. It is not involved in the protein synthesizing functions of that subunit	rplT	50S ribosomal protein L20		MARVKRAVNAHKKRRAILEAAKGYRGQRSRLYRKAKEQVTHSLVYNYNDRKKRKGDFRRLWIQRINAAARANGITYNRFIQGLNAANIEVDRKILAELAVNDATAFAALVEVAQKALPADVNAPKAA
bacteria_247781		25490	12425.9		1.03654	0.195095		1.07844e-07	1.00295e-06		Actinobacteria	ko:K01952	Part of the phosphoribosylformylglycinamidine synthase complex involved in the purines biosynthetic pathway. Catalyzes the ATP-dependent conversion of formylglycinamide ribonucleotide (FGAR) and glutamine to yield formylglycinamidine ribonucleotide (FGAM) and glutamate. The FGAM synthase complex is composed of three subunits. PurQ produces an ammonia molecule by converting glutamine to glutamate.…	purQ	Phosphoribosylformylglycinamidine synthase subunit PurQ		MTARIGVVTFPGSLDDRDTQRAIRLAGAEPVALWHKDKNLHQVDAVVLCGGFSYGDYLRAGAIARFSPVMEPLIEQAKAGLPVLGICNGFQILTEAHLLPGAMLGNDHLHFICRDQKLRVENAGTAWTTDYTAGQEIHIPLKNMDGRYVADEYTLDKLEAEGLVAFRYLARDGVADERGNPNGSLRDIAGITNEAGNVVGLMPHPEHAVEPLIGSGRTDGLPFFTSILKKLVNA
bacteria_59104		27966.9	13628.7		1.03706	0.368636		0.00490452	0.0121686		Actinobacteria				hypothetical protein		MHGHVVAAGVLHAAEHQHLGATRGHLEHFLVRDRVELLRVRHDARVGCVDAVHVGVDLAHVGLGRRRERHRGGVAAAAAERGDLVRALGDALEARDDGDGPFGRRVLDAARRHVDDAGFAVHRRRDHACLRARVGPGLGTERVDRHGEQRHRDPLTRGEQHVEFTRWRHRGDLPGEVEQLVGRVTHGGHDDHDVVARLLGRDDALGHAFDPLGTLNR
bacteria_271943		18362.1	8922.43		1.04128	0.154502		1.58835e-11	4.00946e-10		Actinobacteria	ko:K00762	Catalyzes the transfer of a ribosyl phosphate group from 5-phosphoribose 1-diphosphate to orotate, leading to the formation of orotidine monophosphate (OMP)	pyrE	Orotate phosphoribosyltransferase		MTDVRGALLQQIKDKAVVHGKVTLSSGLEADYYVDLRRITLDGEAAPLVGQVLLDLTADLDFDAVGGLTMGADPVAASMLHAAAARGKKVDAFVVRKAAKAHGLQRRVEGPEIAGRRVLVVEDTSTTGGSPLEAVQAVREAGAEVVAVATIVDRATGAAEKIQEGAGVPYLYAYSKDDLGLD
bacteria_20438		8692.83	4218.97		1.04292	0.249064		2.82217e-05	0.000145387		Actinobacteria	ko:K07727	transcriptional regulator		hypothetical protein		MPIAVDIDVMLARRKMSVGELADRVGITPANLAVLKNGRAKAVRFATLAALCEVLKCQPGDLLRWEAEDAAGE
bacteria_270634		20776.8	10083.1		1.04304	0.242537		1.70394e-05	9.31952e-05		Actinobacteria	ko:K03628	Facilitates transcription termination by a mechanism that involves Rho binding to the nascent RNA, activation of Rho's RNA-dependent ATPase activity, and release of the mRNA from the DNA template	rho	Transcription termination factor Rho		MDEVIFEEFKGTGNAELKLDRKLADKRIFPAVDVDASGTRKEEILLGADELAVTWKLRRVLHALDPQQAIELLLDKMKQTKSNGEFLMQIQKTTPSPGNNND
bacteria_352710		40913.6	19853		1.04318	0.237691		1.13963e-05	6.5022e-05		Actinobacteria	ko:K03569	cell shape determining protein, MreB Mrl	mreB	Cell shape-determining protein MreB		MSFIGRDMAVDLGTANTLVYVRGRGIVLNEPSVVAINTNTGGILAVGSEAKKMIGRTPGNIVAVRPLKDGVIADFEITERMLRYFILKIHKRRYLARPRVVVCVPSGITGVERRAVIEASSQAGARQVHIIEEPMAAAIGSGLPVHEATGNMVVDIGGGTTEVAVISLGGIVTAQSIRVAGDELDSSIIQHIKKEYSLLLGERTAEQIKITIGSAYDLDNDEHTEIRGRDLVSGLPKTVVISAAEVRKAIEEPVNAIVDAVKTTLDKCPPELSGDIMDRGIVLTGGGALLRGLDERLRRETGMPIHIAEDPLDSVALGSGKCVEEFEALQQVLDASPRR
bacteria_273809		75899.7	36809.5		1.044	0.291212		0.000337041	0.00129654		Actinobacteria				hypothetical protein		MDQALDALVHADERTERNQLRDLARHDLADRVGAGELAPRVFLRGLQRQGDALALHVDVEDLDGDFLADLDNLGRVVDVLPGQLRDVDEAVDATQVHEGTEVDDRGHDALADLALLQLVEELAADLGLGLLEPGAAGQDHVVAVLVQLDDLGFELAADVRLEVADATHLDKGGGEEAAEADVEDETTLDDLDDGALDRLVLLLEGLDGAPGALVLGALLREDQTAFLVLLLENKRLDLVTNLDNLVGVDVVLDRQFARGDDALGLVADVEQDLVPVDLDDRALNDVAIVEVLDRLVDSSEEVLLRPDVVDRDLLGRSGNGGGGGVGGH
bacteria_363750		63637.4	30731.2		1.05015	0.19894		1.30099e-07	1.19483e-06		Actinobacteria	ko:K00366,ko:K00392	Belongs to the nitrite and sulfite reductase 4Fe-4S domain family	sir	Sulfite reductase [ferredoxin]		MAATPQNPAAAPRRKVSRHRGEGQWAAGHFTPLNGNEQFKKDDDGLNVRTRIETIYSKRGFDSIDPNDLRGRMRWWGLYTQRKPGIDGGKTAILEPEELDDKYFMLRVRIDGGRLTTQQLRVIGEISQEFARGTADLTDRQNVQYHWIRIEDVPEIWNRLEAVGLSTTEACGDTPRVILGSPVAGIAEDEIIDGTPAIEVIQRRIIGNKDFSNLPRKFKSAISGSPLLDVAHEINDVAFVGVEHPEHGPGFDVWVGGGLSTNPKIGQRLGAWVPLDEVPDVYEGVISIFRDHGYRRLRTRARLKFLLADWGVEKFRQVLEDDYLKRKMIDGPAPAQPVERWRDHVGVHRQKDGRFYVGFAPRVGRVDGTILTKIAELAEAHGSGRLSTTVEQKMIVLDV…
bacteria_298899		35655.4	17166.7		1.05449	0.205781		2.98572e-07	2.49681e-06		Actinobacteria	ko:K01468	amidohydrolase		putative protein		MSDTPVLHVKGRVLAGPDDVRDELWVVGGRISYGRPAGAREVQAVEGWALPGLVDAHCHVGLGGHGPVEPDVAEKQALTDREAGALLLRDAGSPSDTRWVDDRDDLPKIIRAGRHIARTRRYLRGYAHEIEPDDLVAYVAREARRGDGWVKLVGDWIDREAGDLTPSWPRDAVEAAIAEAHRLGARVTAHCFAENSLRDLVESGIDCVEHATGLTQELIPLFVERGVAIVPTLVNIATFPRLAAGGEARFPRWSSHLRRLHERRYDTVRAAYDAGIPVFVGTDAGGTLPHGLVAAEVAELVTAGIPALQALSATTWGAREWLGRPGLDEGAPADLVVYDTDPRADVRVLAAPRRVVLNGAVVG
bacteria_179948		9069.07	4364.56		1.05502	0.231228		5.05095e-06	3.14151e-05		Actinobacteria	ko:K02899	Belongs to the bacterial ribosomal protein bL27 family	rpmA	50S ribosomal protein L27		MAHKKGASSTRNGRDSNAQRLGVKRFGGQVVNAGEILVRQRGTHFHPGASVGRGKDDTLFALAAGAVEFGTHRGRKVVNIVPVA
bacteria_92622		42439.3	20411.9		1.05597	0.340998		0.00195679	0.00569816		Actinobacteria				hypothetical protein		MRVRRQAATRTGVRVLLAEAVELVLAQAALEERSRVDAGGGVALDEDLVAAAGVVLAAEEVVEADLVERRAGGVRRNVSTDTHARPLRAVHRHRGVPADPRAVAALHLLVTGEPRLPLGGDGVDVVRAGQRGHADVVLTRTLEQTQHQVPGPLLTATLEHLVERLEPLGRLFRVDVRQVRGHAVTNDTYPLGAGVLRAQGVSSASLAVPRAGSENRATRSYRCPCATTSSPLLIGSSGSCRSRARDKRYVERASCQSRDLHRGACSGVSSGQQLRRR
bacteria_37289		32636	15674.5		1.05801	0.208609		3.94169e-07	3.18326e-06		Actinobacteria	ko:K01507	Catalyzes the hydrolysis of inorganic pyrophosphate (PPi) forming two phosphate ions	ppa	Inorganic pyrophosphatase		MEEPPVEFDVTIEIPKGSRNKYEVDHETGRIRLDRRLFTSTAYPTDYGFVENTLGEDGDPLDALVILDEPTFPGCLIRCRAIGMFRMTDEAGGDDKLLCVPSTDPRVEHLRDIHHVSEFDRLEIQHFFEVYKDLEPGKSVEGADWVGRTDAEAEIERSYKRFKDQGGH
bacteria_70070		27716.9	13300.8		1.05921	0.180336		4.26681e-09	5.56007e-08		Actinobacteria	ko:K03086,ko:K03087	Sigma factors are initiation factors that promote the attachment of RNA polymerase to specific initiation sites and are then released	sigA	RNA polymerase principal sigma factor HrdB		MVEVINKLARVQRQMLQDLGREPTPEELAKELDMTPEKVIEVQKYGREPISLHTPLGEDGDSEFGYLIEDSEAVVPADAVSFTLLQEQLHSVLDTLSEREAGVVSMRFGLTDGQPKTLDEIGKVYGVTRERIRQIESKTMSKLRHPSRSQVLRDYLD
bacteria_78312		27709.1	13295.8		1.05934	0.167692		2.66384e-10	4.9288e-09		Actinobacteria	ko:K02028,ko:K10008	ABC transporter, ATP-binding protein	gluA	Glutamine transport ATP-binding protein GlnQ		MTEVSVAKEDVVPTGELVVLKSVNKHFGALHVLQDIDLTIARGEVVVVIGPSGSGKSTLCRTINRLETIDTGSIAIDGKPLPQEGKELARLRADVGMVFQSFNLFAHKTVLENVMLGQIKVRKADKKKAEEKARALLDRVGVTTQADKYPAQLSGGQQQRVAIARALAMDPKVMLFDEPTSALDPEMINEVLEVMQQLARDGMTMIVVTHEMGFARSAANRVVFMADGRIVEEAAPDQFFSNPRSDRAKDFLSKILHH
bacteria_304461		53771.2	25794.2		1.05978	0.177447		2.33877e-09	3.2946e-08		Actinobacteria	ko:K00036	Catalyzes the oxidation of glucose 6-phosphate to 6- phosphogluconolactone	zwf	Glucose-6-phosphate 1-dehydrogenase 2		MSNEYPEVEQGDPPLAPVNPLRDPADRRLPRIAGPSGLVIFGVTGDLSRKKLMPAVYDLANRGMLPPGFSLVGFARRDWEDEDFAQIVHDSVREHARTEFREEVWQQLAEGMRFIPGDFDDDTAFKQLRQTVDELDKARGTSGNYAFYLSVPPKFFPKVVQQLKKHGLANAPEGSWRRAVIEKPFGRDLKSARELNALVHDVFDPDQVFRIDHYLGKETVQNILALRFANQMYEPIWNRSYVDHVQITMAEDIGIGGRAGYYDGIGAARDVIQNHLLQLMALTAMEEPAAFDAESLLTEKLKVLRAVKLPEDIGAHAVRGQYAGAWQGGEKVVGYLEEEGIDPASTTDTYAAIRLNVDNRRCAGVPFYLRTGKRLGRRVTEIAVVFQTAPHSPFDSQAT…
bacteria_136769		10619	5092.54		1.06015	0.265035		6.33373e-05	0.000297889		Actinobacteria	ko:K05710	Rieske 2Fe-2S	hcaC	3-phenylpropionate/cinnamic acid dioxygenase ferredoxin subunit		MTAAPTFVRACGLSELDEDTPKRVELDGTPVSVVRTEGEVFAIHDICSHANVSLSEGEVEDCQIECWLHGSSFDLRTGKPSGLPATRPVPVYPVKIEGDDVLVSLTQES
bacteria_228370		9280.97	4445.27		1.06195	0.241732		1.1176e-05	6.39329e-05		Actinobacteria	ko:K13628,ko:K15724	Belongs to the HesB IscA family	erpA	Protein		MQPGGCSGLRYQLFFDERSLDGDVVKDFGGVKVVTDRMSAPYLGGASIDFVDTIEKQGFTIDNPNATGSCACGDSFS
bacteria_111071		80645.3	38594.9		1.06316	0.18465		8.52569e-09	1.044e-07		Actinobacteria	ko:K00525	Provides the precursors necessary for DNA synthesis. Catalyzes the biosynthesis of deoxyribonucleotides from the corresponding ribonucleotides	nrdJ	Vitamin B12-dependent ribonucleotide reductase		MRGADASAGTIKSGGATRRAAKMVVLDVDHPDVEDFIATKVKEEEKIRALRDAGFDMDLGGDDITSVQYQNANNSVRVNDEFMTAVENGTEFGLRARMTGEIIEKVDAKALFRKLAEAAWACADPGIQYDGVINNWHTCPESGRITASNPCSEYMHLDNTSCNLASLNLMKFLKDDSKGNQSFEADRFQKVVELVITAMDISICFADFPTQKIGENTRAFRQLGIGYANLGALLMATGHAYDSDGGRSLAGAITSLMTGTAYRRSAELAAVVGPYDGYARNADAHNRVMKQHSDANGTAVRMDDLDTPVWAAATEAWQDVLRLGEKNGFRNAQASVIAPTGTIGLAMSCDTTGLEPDLALVKFKKLVGGGSMQIVNGTVPQALRRLGYQEEQIEAVVAH…
bacteria_192965		44052.8	21069.9		1.06404	0.301009		0.000407901	0.00152092		Actinobacteria		Rhodopirellula transposase DDE domain		hypothetical protein		MRQEGFSLQGNTKTLEGKQNPDRDAQFHYLNDQVKDHQTGGQPVISVDTKKKELVGEFRNAGREWRPKGEPVEVGTHDFPDKTLGKVAPYGIYDLAANTGWVNVGTDHDTAAFAVESIRRWWNAAGHLTYPRATRLLITADAGGSNGYRTRAWKTELAALAAQTGLAITVCHFPPGTSKWNKIEHRLFSHITLNWRGRPLTSHEVILQTIAATTTRTGLTVHSELDAGTSRPRPRARPGRQRHRAGRARRRSARCVRAPRPPRRPAPRSGLPPPKARGRRIRRSGSPLRAGEAS
bacteria_346842		11657.5	5569.12		1.06567	0.231849		4.29829e-06	2.73401e-05		Actinobacteria	ko:K02446,ko:K11532	Fructose-1,6-bisphosphatase	glpX	Fructose-1,6-bisphosphatase class 2		MTEHHHLPSELEVPSEAPDRNLALELVRVTEAAAMAAGRWVGRGEKNGADGAAVRAMRSLVSTVSMNGVVVIGEGEKDEAPMLFNGERVGDGTGPECDIAVDPIDGTTLTARSRRPRALR
bacteria_37664		58845.7	28094.8		1.06662	0.158184		1.55237e-11	3.92986e-10		Actinobacteria	ko:K10112	Belongs to the ABC transporter superfamily	ugpC	Diacetylchitobiose uptake system ATP-binding protein MsiK		MATVSFDKATRIYPGSTKPAVDGLDIHIEDGEFLVLVGPSGCGKSTSLRMLAGLEDVNGGAIRIGDRDVTHLPPKDRDIAMVFQNYALYPHMSVADNMGFALKIAGINKAEIRQKVEEAAKILDLTEYLDRKPKALSGGQRQRVAMGRAIVREPQVFLMDEPLSNLDAKLRVSTRTQIASLQRRLGITTVYVTHDQVEAMTMGDRVAVLKDGLLQQVDSPRNMYDRPANLFVAGFIGSPAMNLVEVPITDGGVKFGNSVVPVNREALKAASDKGDTTVTVGVRPEHFDIVEHNGAAASALSKDTEDAPAGLAVSVNVVEELGADGYVYGSAKVDGELKDLVVRVSGRAVPEKGATLHVVPRPGETHVFSTSTGERLTD
bacteria_172113		51616.2	24642.8		1.06664	0.246557		1.51739e-05	8.39409e-05		Actinobacteria	ko:K02355	Catalyzes the GTP-dependent ribosomal translocation step during translation elongation. During this step, the ribosome changes from the pre-translocational (PRE) to the post- translocational (POST) state as the newly formed A-site-bound peptidyl-tRNA and P-site-bound deacylated tRNA move to the P and E sites, respectively. Catalyzes the coordinated movement of the two tRNA molecules, the mRNA and…	fusA	Elongation factor G		MFLNAVPQNTGVTVVSGKSSDVTVTPVFCGTAFKNKGVQPLLDAVVRYLPSPLDVEAIEGHDVKDPELVVKRKPSEDEPLSALAFKIMSDPHLGKLTFVRVYSGRLESGSAVLNSVKGKKERIGKIYRMHANKREEIEAVGAGDIVAVMGLKQTTTGETLCDDKNPVILESMDFPAPVIQVAIEPKSKGDQEKLGIAIQRLAEEDPSFQVHSDEETGQTIIGGMGELHLEVLVDRMRREFRVEANVGKPQVAYRETIRKAVDRVDYTHKKQTGGTGQFAKVQIAIEPIEGGDASYEFVNKVTGGRIPKEYIPSVDAGAQEAMQFGILAGYEMTGVRVTLLDGGYHEVDSSELAFKIAGSQAFKEAARKASPVLLEPMMAVEVTTPEDYMGEVIGDINSR…
bacteria_138078		47520.7	22623.3		1.07072	0.160616		2.62353e-11	6.31577e-10		Actinobacteria				hypothetical protein		MFVDDLLDEGLHLGVAQLGLGLALELRLAQLHRDDRGQTLADVVTREVVVLLTQQLLVARVLVDEVRQRRAEAFLVRAALVRVDDVREGVDALGVAAVPLHRDLEGQELGLVLGLQVDHGGVHHVSLAGVEVLHEVDDAALVVVLDDLDFVLLVGARLVRPGGGLRRLALVGEFDPQTLVEERHLLEAAGERLEGVLGGLEDVGVGPEGDRRAVLVRRLVLGQRSRRDAQLVVLRPAVAVGLDLDGDLAGQGVHHGDTHAVQTAGDRVAAAAELAARVQHRQHDLDGRLALGGDDAHRDASAVVDDAHAAVGQDRHVDGVRVAGQRLVHGVVDDLLHQVVQAALAGRADVHTGSLADRVQTLEDGDGAGVVRGGYLAVRRGRLGVGGRDVLVGVAGIGH…
bacteria_178839		21930.4	10413.7		1.07445	0.199209		6.90731e-08	6.77691e-07		Actinobacteria	ko:K01497	Catalyzes the conversion of GTP to 2,5-diamino-6- ribosylamino-4(3H)-pyrimidinone 5'-phosphate (DARP), formate and pyrophosphate	ribA	GTP cyclohydrolase-2		MPDLPAATQRSRVRVPLRFGDGYRVDAELVTFHGLTDGQEHLAVVLGDPGPVPLVRLHSECLTGDVFGSARCDCGPQLREAVERIAERGGVLLYLRQEGRGIGLYNKLDAYALQDQGLDTYAANTALGLPEDARDYTAAAQMLRALGIGELDLLSNNPDKAGQLRDLGIDVRDRVPTGVFTTAHNVRYLRAKVLQTHHTLPLGELSELSVG
bacteria_260870		44270.2	21015.5		1.07488	0.177951		1.5379e-09	2.26147e-08		Actinobacteria				hypothetical protein		MTGGQRQTLGQLGDVLLGEELRDRAGQRAVLGDTDPGQALGTLRDGVVTELVEELPRLRGDVRHRQRPHVLAGERLELRALEDVGDVDELQLGPQVRLVGAVLQHRLAERDPREGRRDVTAVAELLEQLGHELLDRLEDVLLLDEAHLDVELVELARRAVRARVLVTEAGRDLEVPVEAGDHQQLLELLRRLGERVELARVQPGGDHEVAGALGGGRRQDRRRHLVEAQRRHLVPDRRDDRRAQQDVAVHALAAQVEEAVLQAALLVHPVLGVDREGERGGGTEQLDLADLDLDLTGRQVRVDVVGAPGDDLAVDADRRLLGDLVEGLVGRGSRAGDELRDAVVITQIDEEDAAQVAPIVQPATQPDVGADVRGAELAAGVGPVPMHRRSSSLRGSGVR…
bacteria_116851		61603.7	29237.7		1.07517	0.187237		9.34045e-09	1.13045e-07		Actinobacteria	ko:K01652	Acetolactate synthase	ilvB	Acetolactate synthase large subunit IlvB1		MPMTEQATGAHHPQPRPRSGGQQSAPEHVTGAQSLIRSLEEVGAETVFGIPGGAILPAYDPLMDSTRVRHVLVRHEQGAGHAATGYAQATGKVGVCMATSGPGATNLVTPIADAHMDSVPLVAITGQVASKAIGTDAFQEADIVGITMPITKHNFLVTKAEDIPRVIAQAFHIASTGRPGPVLVDIAKDALQAKTTFSWPPVMDLPGYRPVTKPHAKQIREAAKLITAAKRPILYVGGGVLKAGATAELKVLAELTGAPVTTTLMALGAFPDSHPQHLGMPGMHGSVAAVTGLQKADLIIALGARFDDRVTGKLDSFAPYAKIVHADIDPAEIGKNRAADVPIVGDAREVIADLVQAVQKEHSEGQQGDYSAWWTDLSRWRDAYPLGYDQPADGSLSPQ…
bacteria_32459		40693.6	19309.5		1.0755	0.153983		2.85844e-12	8.4746e-11		Actinobacteria	ko:K02886	One of the primary rRNA binding proteins. Required for association of the 30S and 50S subunits to form the 70S ribosome, for tRNA binding and peptide bond formation. It has been suggested to have peptidyltransferase activity	rplB	50S ribosomal protein L2		MGIRKYKPTTPGRRGSSVADFVEITRSTPEKSLVRPLHSKGGRNNAGRITARHQGGGHKRAYRVIDFRRHDKDGVPAKVAHIEYDPNRTARIALLHYADGEKRYIIAPRGVGQGDRIENGPTADIKPGNNLPLRNIPVGTTIHAVELRPGGGAKMARSAGAGIQLLAREGKMAHLRMPSGEIRLVDARCRATVGEVGNAEQSNINWGKAGRMRWKGVRPTVRGVAMNPVDHPHGGGEGKTSGGRHPVNPNGKPEGRTRRPNKESDKLIVRRRRTGKNKR
bacteria_132974		31649.6	14988.5		1.07832	0.230001		2.75438e-06	1.83729e-05		Actinobacteria	ko:K03723	Couples transcription and DNA repair by recognizing RNA polymerase (RNAP) stalled at DNA lesions. Mediates ATP-dependent release of RNAP and its truncated transcript from the DNA, and recruitment of nucleotide excision repair machinery to the damaged site	mfd	Transcription-repair-coupling factor		MQSIEKAAARLRDLVPEARIATAHGQMSEHQLEQVMLDFWEKQFDVLVCTTIVESGLDVSNANTMIIERADMLGLSQLHQMRGRVGRARERGYAYFLYPPEKPLTETAHERLATIAQHTEMGAGMYVAMKDLEIRGAGNLLGGEQSGHIAGVGFDLYVRMVGEAVADYRRQLETGGIEEEPPLEVKIELPVDAHVPHDYAPGERLRLQAYRAIASANSEQDVKAVREELVDRYGKLPEPVENLLLVAGLRMLARACGVGEIVLQGTNIRFAPVELRESQELRLKRLYPGTVIKPAAHQILVPRPKTAKVGGKPLVGRDLLGWVGEFLATVLGS
bacteria_254203		32846	15549.2		1.07887	0.172013		3.56423e-10	6.38742e-09		Actinobacteria	ko:K02000	glycine betaine		Glycine betaine transport ATP-binding protein OpuAA		MTPTQTEVPPRRGTPEDAAPTPVISVRGLWKVFGPKANQVPDSEELRGLTRRELMDRTGCTAAVRDVHFEVAPGEVFVVMGLSGSGKSTLVRCLTRLIEPTAGEIVFEGEDIRDADERRLRELRRSKFSMVFQHFGLLPHRRVVDNVAFGLEIRGMGRAERTRRALEVVELVGLSGYENSYPDQLSGGMQQRVGLARALAGDPDVLLFDEPFSALDPLIRRDMQSEVIRLHHEVGKTMVFITHDLSEALKLGDRILIMRDGKMVQCGTGDELVGAPADDYVRDFVKDVARGDVLTLRWIMRPATPEDPLDGPELGPDVVVKEATRAVLAADKPVKVVENGKLIGIVGDEEILAVVAGQEGDA
bacteria_26898		5413.51	2552.04		1.08493	0.232287		3.00269e-06	1.98272e-05		Actinobacteria		Protein of unknown function (DUF3117)		hypothetical protein		MAAMKPRTGDGPLEVTKEGRGIVMRVPLEGGGRLVVELTPDEADALGDALKKVVG
bacteria_257907		11777.5	5547.98		1.08593	0.211322		2.76571e-07	2.32937e-06		Actinobacteria	ko:K02876	binds to the 23S rRNA	rplO	50S ribosomal protein L15		MRLPKLKGFKNPFKTEFQVVNLDKLAALYPEGGEVTVEGLVAKGAVRKNSLVKVLGQGEISVALQVTVDAVSGSAKEKITAAGGTVTELI
bacteria_174001		20838.2	9792.42		1.08954	0.178931		1.13523e-09	1.75652e-08		Actinobacteria	ko:K01847,ko:K01849,ko:K11942,ko:K14447	Catalyzes the reversible interconversion of isobutyryl- CoA and n-butyryl-CoA, using radical chemistry. Also exhibits GTPase activity, associated with its G-protein domain (MeaI) that functions as a chaperone that assists cofactor delivery and proper holo-enzyme assembly	icmF	Fused isobutyryl-CoA mutase		MTGVQTCASSDLATRGSHELPEHLSDVIDVLKAAGFDLVIVETPGIGQGDAAIVPFVDTSLYVMTPEFGAASQLEKIDMLDFADVVAINKFERRGAKDALRDVGRQLVRNREAFGMRPEDMPVYGTSAATFNDDGVTALHQHLKTVLA
bacteria_242396		17916.4	8416.94		1.08984	0.311512		0.000467825	0.0017129		Actinobacteria	ko:K02948	Located on the platform of the 30S subunit, it bridges several disparate RNA helices of the 16S rRNA. Forms part of the Shine-Dalgarno cleft in the 70S ribosome	rpsK	30S ribosomal protein S11		MPPKGRQGAAKKVRRKEKKNVAHGQAHIKSTFNNTIVSITDPAGNVISWASAGHVGFKGSRKSTPFAAQMAAESAARRAQEHGMRKVDVFVKGPGAGRETAIRSLQATGLEVGSIQDVTPTPHNGCRPPKRRRV
bacteria_264511		54538.5	25615.6		1.09025	0.49219		0.0267532	0.0466786		Actinobacteria				hypothetical protein		MVRLDVRGARAAAGLDDVRVERALHQEAVVALGLEVALRLLEHADELTADDLALLLGVRDAGERAEEAFAGVDRDQVDARGGHVVALDLGALTGAQQAVVDEDAGEAVADGPLDQRGGHGGVDASRQRADGLAVADLLADARDLLVHDGRRGPLRTDARDVVQEPAQHLLAVRRVVHLRVVLHTGETAFGVLERGDRGALAGRGDREALRCLGDGVTVAHPHGVAAGQFLVQRAARARDAEVGAAVLAGAGLFNRAAKCARHGLEAVADAEDRDAGLEQLRVDLRGVLLVDARRATGQNDGQRVLVEDLAHRRGVRDHLGVDLGLAHAAGDQLRVLGTEVDDENRAVAGVGHVVKDLMRGR
bacteria_14441		72058.9	33830.2		1.09085	0.193202		1.64075e-08	1.88016e-07		Actinobacteria	ko:K01649	Catalyzes the condensation of the acetyl group of acetyl-CoA with 3-methyl-2-oxobutanoate (2-oxoisovalerate) to form 3-carboxy-3-hydroxy-4-methylpentanoate (2-isopropylmalate)	leuA	2-isopropylmalate synthase		MANRQQPSQMPIHKYGQYDQVDIPDRTWPNNRITAAPRWLSTDLRDGNQALIDPMSPDRKRRMFDQLVKMGYKEIEVGFPASGQTDFDFVRSIIEEEGAIPDDVTISVLTQAREDLIERTVESLKGARRATVHLYNATAPVFRRVVFRGSKDDIRQIAVDGTRLVMEYAEKLLGPETEFGYQYSPEIFTDTELDFALEVCEAVMDVYQPGPGREIILNLPATVERSTPSTHADRFEWMSRNISRREHVVISVHPHNDRGTAVAAAELALMAGADRVEGCLFGQGERTGNVDLVTLGMNLFSQGVDPQIDFSDIDEIRRTWEYCNQMEVHPRHPYVGDLVYTSFSGSHQDAIKKGFDAMEADAAARGVTVDDIEWAVPYLPIDPKDVGRSYEAVIRVISQ…
bacteria_180291		43853.8	20572.8		1.09195	0.158366		5.38128e-12	1.50693e-10		Actinobacteria	ko:K03046	DNA-dependent RNA polymerase catalyzes the transcription of DNA into RNA using the four ribonucleoside triphosphates as substrates	rpoC	DNA-directed RNA polymerase subunit beta'		MLNRAPTLHRLGIQAFEPQLVEGKAIQIHPLVCTAFNADFDGDQMAVHLPLSAEAQAEARILMLSSNNILKPADGRPVTMPTQDMVLGLFFLTTDSEERVVIGEGRAFGATAEAIMAFDNRELSMQSLVDIRFPVGTVPPRGWTPPEPTEGEEPYQLGDTFRLRTTLGRALFNELLPEDYPFVDYAVGKKQLSEIVNDLAERYPKVIVAATLDNLKAAGFHWATRSGVTVSVTDIVVPEAKKAIIASYEAQDEKVQKQYERGLITKDERTQELIAIWTKATNEVAEAMNANFPKTNRPDCRPACGGRPARSGSGRIAR
bacteria_111977		42229.7	19798.6		1.09285	0.15839		5.20982e-12	1.46123e-10		Actinobacteria	ko:K00666	PFAM AMP-dependent synthetase and ligase	fadD5	3-[(3aS,4S,7aS)-7a-methyl-1,5-dioxo-octahydro-1H-inden-4-yl]propanoyl:CoA ligase		MGIWAVNCPEWVLVQYATARIGAIMVNINPAYRTHEVEYVLNQAGISLLFASLSHRTSDYRAMVDEVRGRCRELREVVHIGDPSWQALIGRAVPDAVHPELSCDDPINIQYTSGTTGFPKGATLSHHNILNNGYFVGELISYTEQDRICVPVPFYHCFGMVMGNLAATSHGACMVIPAPSFDPAATLRAVQQERCTSLYGVPTMFIAELNLPDFATYDLSSLRTGIMAGSPCPVEVMKRVVAEMHMAEVSICYGMTETSPVSLQTRRDDDLEHRTGTVGRVLPHIEVKVVDPATGVTQPRGTAGELCTRGYSVMLGYWNEPEKTAEAVDAGRWMHTGDLATMREDGYVEIVGRIKDMIIRGGENIYPREIEEFLYGHPKIADVQVVGVPHERYGEEVLA…
bacteria_279934		7110.11	3331.67		1.09356	0.316522		0.000550465	0.00197336		Actinobacteria				hypothetical protein		MTTVLTPASPLTAADRCDRCGAQAYVRVVLLSGGELLFCAHHGRKFEPELKKIAAEIQDETERLTTVPASALEEER
bacteria_162653		20275	9474.18		1.09759	0.180081		1.09432e-09	1.70098e-08		Actinobacteria	ko:K00954	Reversibly transfers an adenylyl group from ATP to 4'- phosphopantetheine, yielding dephospho-CoA (dPCoA) and pyrophosphate	coaD	Phosphopantetheine adenylyltransferase		MTGPESEGSQVRRAVCPGSFDPITNGHLDIISRASRLYDEVYVAVMINKSKKGLFEIDERIDLIREVTAEYGNVIVEAFHGLLVDYCKERDIPAIVKGLRAVSDFDYELQMAQMNNGLSGVETLFVPTNPTYSFLSSSLVKEVATWGGDVSHLVPPLVLEALNKRLRKD
bacteria_42518		29342.5	13698.5		1.09892	0.171299		1.40632e-10	2.82705e-09		Actinobacteria	ko:K01870	amino acids such as valine, to avoid such errors it has two additional distinct tRNA(Ile)-dependent editing activities. One activity is designated as 'pretransfer' editing and involves the hydrolysis of activated Val-AMP. The other activity is designated 'posttransfer' editing and involves deacylation of mischarged Val-tRNA(Ile)	ileS	Isoleucine--tRNA ligase		MTTPTYRQVPAQVDLPALEHAVLDFWREQKIFTKSLEQSEGRPEWVFYEGPPTANGMPGAHHIEARVFKDVFPRFRTMRGYHVARKAGWDCHGLPVELAVEKELGFTGKKDIEAYGIAEFNAKCRESVTRHTDAFEALTTRMGYWTDLQDPYRTMDPEYIESVWWSLKEIFNKGLLVQDYRVAPWCPRDETGLSDHELAQGYETIVDPSVYVRFPLTSGPLAGEAALLVWTTTVS
bacteria_287526		21101.8	9849.42		1.09922	0.365752		0.00265255	0.00735455		Actinobacteria				hypothetical protein		MRREEALVELDALGDHQLGRQGRRLLDGDDAVFADLLDGFAEQGADVRVTRGHGADLGDVLAALDRGGLGLEDLDDLLRGGLDAAADRRGVGAGRDVAQADLHQRLREHGRGRGAVAGDVVGLGGDALGELRAEVLERVVELDLTGDGHAVEGDGRAAELLVEHDVATARAEGDLDRVGELVHPALECATSVLVEFDLLGHSVFRLPSGGLERKNAPLPGVVRGPGRHALRADVS
bacteria_347233		64481.8	30081.7		1.09999	0.202806		5.83316e-08	5.81014e-07		Actinobacteria	ko:K03727	DEAD DEAH box helicase	helY	putative helicase HelY		MLPTFKEVVEELFVQGLVKAVFATETLALGINMPARSVVLEKLVKWNGEQHADITPGEYTQLTGRAGRRGIDVEGHAVVLWQRGMSPDHLAGLAGTRTYPLRSSFKPSYNMAVNLVEQFGRHRSRELLETSFAQFQADKSVVGISRQVQRNEEGLDGYKESMTCHLGDFEEYAALRRELKDRETDLARQGAAQRRAEAAVALEKLKPGDIIHVPTGKYAGLALVLDPGLPAGRSNGHRGFEQHDGPRPLVLTSERQVKRLASMDFPVPVEPLERMRVPKSFNPRSPQSRRDLASALRTKAGHIPPERARKQRSQAADDREIARLRTAIRAHACHGCNDREDHARWAERYHRLLRDTSQLERRIEGRTNTIARTFDRIVALLTELDYLRADEVTEHGKRL…
bacteria_80703		42256.3	19684		1.10212	0.19997		3.55936e-08	3.73036e-07		Actinobacteria	ko:K00333	NDH-1 shuttles electrons from NADH, via FMN and iron- sulfur (Fe-S) centers, to quinones in the respiratory chain. The immediate electron acceptor for the enzyme in this species is believed to be a menaquinone. Couples the redox reaction to proton translocation (for every two electrons transferred, four hydrogen ions are translocated across the cytoplasmic membrane), and thus conserves the redox …	nuoD	NADH-quinone oxidoreductase subunit D		MSSTQSSAASASARETTEGTVYTVTGGDWDEVVQSAARADDERIVVNMGPQHPSTHGVLRLILEIDGETVTEARCGIGYLHTGIEKNLEYRTWTQGTTFVTRMDYLTSFFNETAYCLAVEKLLGIEDQITERAKIIRVLLMELNRMSSHLVCIATGGMELGATTIMIYGFRDREMILDIYELITGLRMNHAFIRPGGLAQDLPPGAVDQIREFVKKMKKNLPEYDKLATGNPIFKARMQDVGYLDLAGCMALGATGPILRSTGLPHDLRKTQPYCDYETYDFDVPTADSCDSYGRFLIRLEEMRQSLRIVEQCLDRLQPGPVMVADRKIA
bacteria_373646		25232.5	11725.9		1.10554	0.195234		1.49068e-08	1.72723e-07		Actinobacteria	ko:K00569	Methyltransferase	tpm	hypothetical protein		MYAHIPDVVGFTRGLRALVADDGWVSIEVQHLLTLIEENQYDTIYHEHFQYYTVASATRALASGGLALVDVELLPTHGGSIRLWARPAEAAGEPTSRVAEVLDREKAAGLQELSGYTEFSARVAKVRRDLLRFLIEAAERGETVVGYGAPGKGNTLLNHCGIRPDLLAYTVDRNPYKHGRFTPGTRIPILAPEQIAVDRPDYVLVLPWNLRAELVEQLSFVHAWGGRLVFPIPELSIVEVTS
bacteria_236273		16564.7	7696.97		1.10568	0.276216		6.25602e-05	0.000294783		Actinobacteria	ko:K07483	PFAM transposase IS3 IS911 family protein		Insertion element IS6110 uncharacterized 12.0 kDa protein		MESMGKKKPRPRRSFTPEFKAEIVELCRRGDRSVGQIAKDFDLTETAVRDWVKQAEVDAGERDGLTSSEREELAALRRENRRLREDVDILKRATAFFAKETR
bacteria_351682		15732.1	7302.22		1.10724	0.259207		1.94024e-05	0.000104456		Actinobacteria	ko:K02946	Involved in the binding of tRNA to the ribosomes	rpsJ	hypothetical protein		MPLPTEKNVYCVIKSPHKYKDSREHFEMRTHKRLIDILDPTPKTVDSLMRLDDAVHVLLSGQRHRARDRRTSAGHRLDDLLRRGIDDLVVVGLEPDADLLSRHGYSVVLCLVKRSGTLGFASRPPTHAVGCVALLPHGYPLRISLRGTRPARKQPQDRGLKHPPGA
bacteria_127613		56551.1	26235.4		1.10802	0.187149		3.20889e-09	4.31843e-08		Actinobacteria	ko:K03545	Involved in protein export. Acts as a chaperone by maintaining the newly synthesized protein in an open conformation. Functions as a peptidyl-prolyl cis-trans isomerase	tig	Trigger factor		MPFEELKDSLDAAYKKINQQVTVKGFRKGKIPARVIDQRFGRGAVLEEAVNDALPKFYTEAVNEAELNVLGQPEVDITELKDGETLNFTAEVDVRPTIEIPDYSGIEVEVDAIEVTEEDIDKSVEQLRERFASTSPVERAAEDGDVVTLDLEAKVDGEVLEDGVATGLSYTIGSGELLDGVDDAVKGVEAGGEATFTSELKGGSAAGQEAEVTVKVTQVAARELPALDDEFAQLASEFDTLEELRADSRKRLENMKQYDQATQAQERVLEKLLELVEVPVPEKLLEEEINTRKHNLEHHQLGQMGLDLEKYLEIQGKTAEEFDTETKEAAVKGIKTQFVLDELVNKEKLNVNQEELTEHLMRRATSSGMSPDQFAQAVVEGNQVPMLVGEVARGKALAV…
bacteria_123535		27240.3	12576		1.11504	0.207309		7.50429e-08	7.28576e-07		Actinobacteria	ko:K03466	Belongs to the FtsK SpoIIIE SftA family	ftsK	DNA translocase FtsK		MDLRYDDLAAYGFRHIDDFNEAIRNGKVKLPEGSERELQPYPYLLVIVDELADLMMVAPRDVEDAIVRITQLARAAGIHLVLATQRPSVDVVTGLIKANVPSRLAFATSSLADSRVILDQPGAEKLIGKGDGLFLPMGANKPTRMQGAFVTEDEVAAIVQHCKDQMAPVFRDDVVVGTKQKKEIDEEIGDDLDLLCQAAELVVSTQFGSTSMLQRKLRVGFAKAGRLMDLMESRGIIGPSEGSKARDVLVKADELDGVLAVIRGEA
bacteria_315698		10856.6	5008.77		1.116	0.252819		1.0137e-05	5.85363e-05		Actinobacteria	ko:K02899	Belongs to the bacterial ribosomal protein bL27 family	rpmA	50S ribosomal protein L27		MAHKKGASSTRNGRDSNAQRLGVKRFGGQVVNAGEIIVRQRGTHFHPGSGVGRGGDDTLFALNAGAVEFGTHRGRKVVNIVPVA
bacteria_64611		22702.3	10441.7		1.12044	0.21617		2.1821e-07	1.88178e-06		Actinobacteria	ko:K02356	Involved in peptide bond synthesis. Stimulates efficient translation and peptide-bond synthesis on native or reconstituted 70S ribosomes in vitro. Probably functions indirectly by altering the affinity of the ribosome for aminoacyl-tRNA, thus increasing their reactivity as acceptors for peptidyl transferase	efp	Elongation factor P		MLSGKVVDKTFNAGVKVETATVDKRDMQFSYMDGEYFVFMDMDTYDQLMVDRKAVGDAANFLIEGFTATVAQHEGEVLFVELPAAVELVIQETEPGVQGDRSTGGTKPATLETGHQIQVPLFITTGEKIKVDTRTSDYLGRVNS
bacteria_217259		20098.5	9227.98		1.12298	0.23087		1.14959e-06	8.3697e-06		Actinobacteria	ko:K09013	FeS assembly ATPase SufC	sufC	Vegetative protein 296		MSVDERARAGLFLAMQYPVEVPGVSVSNFLRTSATAVRGEAPKLRTWVKEVKETMERLSMDPSFAERNVNEGFSGGEKKRHEILQLELLKPKIAILDETDSGLDVDALRVVSEGVNRVRETGEVGTLLITHYTRILRYIKPDFVHVFSGGRIVESGGAELADKLENEGYEAYAKQDEVDTKGGVSA
bacteria_102490		32748.7	15027.2		1.12383	0.260503		1.60286e-05	8.82048e-05		Actinobacteria	ko:K00130,ko:K00151,ko:K10217	Belongs to the aldehyde dehydrogenase family	hpaE	Betaine aldehyde dehydrogenase		MRRISFTGSVPTAKRIAESAAANLTPLSLELGGKSPLLVFADADLDLAVDLAVEQYDNAGQVCLAATRFLVEESVAEEFTRRFVEKAGQLTQGDPRGEATDIGPNIHPLQLEKIDGFVQRAVAAGARAVIGGHRKDGQYYAPTLLTAVAQDSEIVQEEVFGPVLTLQTFATEDEAVRLANDTRFGLAATLATGDPERAERVTAQLVAGTVWTNCFFVRDLQAPFGGSRHSGVGREGGTWSFDFYCDLKNTVTSPNGWNNHG
bacteria_133569		40170.2	18423.7		1.12454	0.172715		7.46701e-11	1.58775e-09		Actinobacteria	ko:K03517	Catalyzes the condensation of iminoaspartate with dihydroxyacetone phosphate to form quinolinate	nadA	Quinolinate synthase A		MTTVDLPLLPLGRGVDLGSERGVECPGDLPSPSDPDLVERARAAKEKLGDKVFVLGHHYQRDEVIQFADVTGDSFKLARDAAARPEAEYIVFCGVHFMAESADILTSDDQKVVLPDLAAGCSMADMATAEQVAECWDVLTEAGIAEQVVPVSYMNSSADIKAFTGKHGGTICTSSNAKKALEWAFEQGEKVLFLPDQHLGRNTAVRDMGMTLEDCVLYNPHKPNGGLTAEQLRDAKMILWRGHCSVHGRFSLDSVEDVRARIPGVNVLVHPECKHEVVAAADYVGSTEYIIKALEAAPAGSKWAIGTELNLVRRLANRFAPEGKEIVFLDKTVCFCSTMNRIDLPHLVWTLESLAEGKLVNRIEVDKETEAFAKLALERMLALP
bacteria_336142		17624.1	8080.7		1.12497	0.245657		4.66274e-06	2.94147e-05		Actinobacteria	ko:K02948	Located on the platform of the 30S subunit, it bridges several disparate RNA helices of the 16S rRNA. Forms part of the Shine-Dalgarno cleft in the 70S ribosome	rpsK	30S ribosomal protein S11		MPPKGRQGAAKKVRRKEKKNVAHGHAHIKSTFNNTIVSITDPSGNVISWASAGHVGFKGSRKSTPFAAQMAAESAARRAQEHGMRKVDVFVKGPGSGRETAIRSLQATGLEVGSIQDVTPTPHNGCRPPKRRRV
bacteria_344535		20270.3	9292.99		1.12512	0.242457		3.47555e-06	2.26449e-05		Actinobacteria		Protein of unknown function (DUF3145)		hypothetical protein		MTTRGVLYVHSAPRALCPHVEWAVAGVLGTRVNLDWIRQPAAPGTWRSEFSWKAEVGTASKLASALRGWHLLRFEVTAEPCPTAEGERYSCTPELGIFHAVTGIHGDILIPEDRLRAALTRSQRGETDLEAELAKLLGKPWDDELEPFRYAGEGAPVRWLHQVV
bacteria_16970		41455	18997		1.12575	0.218708		2.64268e-07	2.23427e-06		Actinobacteria	ko:K00219	NADH flavin oxidoreductase NADH oxidase	fadH	hypothetical protein		MPRGAYTWVTKKLMGEVGIPLVTTNRINTPEVAHELLRHPGVRAARHRGGDGGDTGLVPADAGVDDGRAGRLDGLGEGDDLVEGGAAGHQVQHGQPVDDDEVLADRLAHPPDDLDGEPRPVLVRAAPAVGAVVGLGGDELVDEIALGAHDLDAVVAGLAGEAGGAGVVVDGPLDVGVGELAGREGADGGLERAGGDQVPVVGVAAEVEDLHRDPAALAVHGVRDRPVLLGLRVRGELRAALVRPALVVGGDAAGDDEAHSPTGPGGVERGHALEAAFGLLQADVHRAHQDAVGQRGEAQVERAQQVRVAARAHGVLLRGCALPL
bacteria_338551		8813.47	4037.64		1.12603	0.231967		1.20826e-06	8.7815e-06		Actinobacteria	ko:K02968	Binds directly to 16S ribosomal RNA	rpsT	30S ribosomal protein S20		MANIKSQIKRNKTNEKARLRNKAVKSSLKTAIRKAREAAAAGDVEKATEYTREASRKLDKAVSKGVIHKNQAANKKSALASKVVSLKG
bacteria_226482		11761.3	5375.35		1.12956	0.300533		0.000170906	0.000713928		Actinobacteria	ko:K02078	Carrier of the growing fatty acid chain in fatty acid biosynthesis	acpP	Meromycolate extension acyl carrier protein		MAATQEEIVAGLADIVNEIAGIPVEDVQLDKSFTDDLDVDSLSMVEVVVAAEERFDVKIPDEDVKNLKTVGDATEYILKNQD
bacteria_332801		28457.8	12991.6		1.13121	0.225228		5.10003e-07	4.03933e-06		Actinobacteria		Short-chain dehydrogenase reductase sdr		Glucose 1-dehydrogenase 1		MGKLDGKVAVITGATSGMALAGAQVFVDEGAHVFISGRRKDALDEAVKLIGRNVTGVQGDSADLDDLDRLFETVKQEKGTVDVLWASAGMGEQGRLGEITEEQFDAAFSLNARGTLFTVQKALPLFNDGGSIVMTGSNASLRGYPDWSVYAASKAVLPAYARVWVSELRDRRIRVNVLTPGQVATPILDEVMDEQMKAHFESVIPRREMGRPEEIASVALFLASDDSSYVNGMELVVDGGTTAI
bacteria_120677		24676	11262.3		1.13158	0.206515		4.2679e-08	4.38802e-07		Actinobacteria				hypothetical protein		MRRLRLLLAEPVEVVLAEPVEQERARVDARRGVALEEDLVAAVTLVLAAEEVVEADVVEGRRGGEGGDVAAHADARPLGPGHHHSRVPAGGVEDLALDLLVAGEERLGPGGDGVDVVRAAHLGHGHALLAGPLDQAQHEIAGPLPAALVDRGVEGVEPLLGFLGIEVRNLTRKAANDDRVAIGSGSHAVPYLSEGLCGGWMGLWVSLGASRASRG
bacteria_185735		48418.5	22086.3		1.13239	0.209174		6.17645e-08	6.13134e-07		Actinobacteria	ko:K01687	Belongs to the ILVD EDD family	ilvD	Dihydroxy-acid dehydratase		MSTTVRAASSYSALRAVWVAGRTVMDITRRYYEQDDETVLPRNIATIAAFENAMALDIAMGGSTNTILHLLAAAQEAGVPFGLEEINEVSRRVPCLAKVAPNVAKDRTYYMEDVHRAGGIPALLGELHRAGLLNEDVFSVHSPSLADWLKTWDVRAGSPSPEALELWHAAPGCVRSAEAFSQSERWEALDEDAEGGCIRSAEHAYSKDGGLAVLRGNLAVDGCVVKTAGVDESIWTFEGPAVVCESQEEAVEKILNKKVTHGDVVVIRYEGPKGGPGMQEMLYPTSFLKGRGLGKTCALITDGRFSGGTSGLSIGHASPEAASGGTIALVEDGDRIRIDIPNRTIELLVDDAELARRETALGGVYAPRNRERKVSAALRAYAAMATSADKGAVRDVSKLG
bacteria_272937		71341.8	32432.3		1.13731	0.435413		0.00900093	0.0196378		Actinobacteria				hypothetical protein		MQLLDDLFRDGLLHQQAGSGAADVALVEEDAVDDALDGLVERRVVEHDVRGLATQFERELLVRTGQLALNDLADVGRPGERHLVHVRVLDERRTDVTGAGDDVDDARRQVALLDDVGQHQRRQRRGLGRLEHDGVAARERGRDLPRGHQQREVPRDDLSRDAEGLRVRSVARVGELVRPARVVEEVRRGRRHVDVARLLDRLAVVQRLQHRELTPAFLDLPRDPVDVFGAFAAGHLRPHTVVGLAGRLDGGVHIGLTGRRDLREHLFGGGVDGLERFAGALDELAVDEHPVVRLEVRDVPRLGRGGVFPHVFSPPSRSPGRCSGRPTGSAAA
bacteria_59316		9488.56	4312.48		1.1376	0.24601		3.76044e-06	2.43039e-05		Actinobacteria		cytochrome P450		Cytochrome P450-terp		MDVTRADNDHVTFGKGSPHLCLGNLLARTEIRIMFEELIPRLADIRLVGDVPRVRSNFVNGIKKLPVEVTLA
bacteria_279761		22895.3	10401.8		1.13814	0.18994		2.07185e-09	2.94526e-08		Actinobacteria	ko:K01580	Belongs to the group II decarboxylase family	gadB	Glutamate decarboxylase		MFYENYLGKTDATFTLNFSTGASMVLAQYYNFVRLGRQGYTYVMKMMQENARALADNLRDSGRFEVIGSDAEQLPLVAFRLAGEHAYDESDIAWQLSAERGWMVPAYTLPPNAERVKILRALVRETLSREQVDRLSQDIDDACRTLDDKGATHGIERAQVKRGTGY
bacteria_343790		34601.5	15693.7		1.14061	0.177668		1.36387e-10	2.75109e-09		Actinobacteria	ko:K11779,ko:K11780,ko:K11781,ko:K11784,ko:K18285	Radical SAM enzyme that catalyzes the cyclization of dehypoxanthine futalosine (DHFL) into cyclic dehypoxanthine futalosine (CDHFL), a step in the biosynthesis of menaquinone (MK, vitamin K2)	mqnC	Cyclic dehypoxanthine futalosine synthase		MRRRRYAGTEHIATYIIERNINYTNVCVTACKFCAFYAPPTAKDKGWTRDLDDILRRCAETVELGGTQIMFQGGHHPDYGVEYYEKHFAAIMKEFPQLVIHSLGASEVEHMARISKVSVEEAIQRIHAAGLDSFAGAGAEMLPERPRKAIAPLKESGERWLEIMETAHNLGVESTSTMLMGTGETNAERIEHLRMIRDVQDRTGGFRAFIPYLYQPMNNHLKGRTQATIFEYLRMIAISRLFMDNIAHIQGSWLTTGQDAGQLTLHYGADDLGSVMLEENVVSAAGAKHRSNLQEMIDMIRTAGRVPAQRATTYEHLVVHDDPANDPVDARVMSHISSTAIAGGTAHPELKILASN
bacteria_27228		26368.3	11899.2		1.14791	0.176286		7.43278e-11	1.58238e-09		Actinobacteria	ko:K06942	ATPase that binds to both the 70S ribosome and the 50S ribosomal subunit in a nucleotide-independent manner	ychF	Ribosome-binding ATPase YchF		MHVDGKVSPSDDIETINTELILADLQTIEKVLPRLQRESRIKKDIGPKVAAVEAAKEILEKGDTLFSAGIVQGSGNEELLHDLHLLTTKPFLYVFNVDEDELVDEAFKDEQRALVAPAEAIFLNAKLEADLAELDEEEALELLESVGVEEPGMATLARVGFDTLGLQTYLTAGPKESRAWTIKKGATAPEAAGVIHTDFQKGFIKAEVISFEDLVEMGSVAEARAKGKARMEGKEYVMQDGDVVEFRFNV
bacteria_167743		28069.2	12663.1		1.1483	0.188691		1.1606e-09	1.79264e-08		Actinobacteria		Short-chain dehydrogenase reductase sdr		Levodione reductase		MTASPDEIICRRLVGRTAVITGAGSGIGLATARRLASEGAHVVCGDVDETRGKAAAEEVGGIFVKVDVTDPEQVEALFQAAYDTYGSVDVAFNNAGISPPDDDSILETGLEAWRRVQEVNLTSVYLCCKAAIPYMRRQGRGSIINTASFVARMGAATSQISYTASKGGVLAMSRELGVQFAREGIRVNALCPGPVNTPLLQELFAKDPERAARRLVHIPVGRFAEAEEIAAAVAFLASDDSSFVNATDFLVDGGISGAYVTPL
bacteria_147068		19256.4	8683.83		1.14883	0.257773		8.32047e-06	4.90566e-05		Actinobacteria	ko:K02952	Located at the top of the head of the 30S subunit, it contacts several helices of the 16S rRNA. In the 70S ribosome it contacts the 23S rRNA (bridge B1a) and protein L5 of the 50S subunit (bridge B1b), connecting the 2 subunits	rpsM	30S ribosomal protein S13		MARVSGVDIPREKRVEVALTYVFGIGRTLSQLTLAETGIDPDTRVRDLSEEQLVAIREYVDNNIKTEGDLRREVQADIRRKVEIGCYQGLRHRRGLPVRGQRTSTNARTRKGPRRAIAGKKKPGKK
bacteria_266509		23931	10790.9		1.14901	0.340225		0.000732229	0.00249681		Actinobacteria	ko:K00508	Fatty acid desaturase	desA3	NADPH-dependent stearoyl-CoA 9-desaturase		MRVDEDQKWHPFHLGQPLWNFLNACFFEYGIAAYDLELGKNLHKRRRNNPEFRARVRAVGRKIRKQVLKDYVIHPLLSGPSFLTTLAATFTANLVRNVWTHSVIMCGHFPEGVQVFERRSIKGETRGQWYLRQMMGSANISGSKAMHFMTGNLSHQIEHHLFPDLPSNRYAEVAVKVRALFEKYELEYVTGPLPKQVLSAWHKVFRLSLPNKKPKVKTPDREQDLVAWA
bacteria_346241		8300.34	3742.82		1.14905	0.236712		1.20864e-06	8.7815e-06		Actinobacteria	ko:K02518	One of the essential components for the initiation of protein synthesis. Stabilizes the binding of IF-2 and IF-3 on the 30S subunit to which N-formylmethionyl-tRNA(fMet) subsequently binds. Helps modulate mRNA selection, yielding the 30S pre- initiation complex (PIC). Upon addition of the 50S ribosomal subunit IF-1, IF-2 and IF-3 are released leaving the mature 70S translation initation complex	infA	Translation initiation factor IF-1		MAKKQGAIEIEGTVIESLPNAMFRVELQNGHKVLAHISGKMRMHYIRILPDDRVVVELSPYDLTRGRIVYRYK
bacteria_137780		24536	11062.2		1.14922	0.17755		9.62697e-11	2.00837e-09		Actinobacteria				hypothetical protein		MRHERGARVAVSRKDVDDTLGQAGLAADVREEQRGERGRLGGLQHHRVAGRQGRGDLPRQHQQREVPGDDLPGDAEGAGVPAEAGMVELVGPARVVEEVRGDQGEVGVARLLDGLAVVQRLQDGQFAAALLDDPGDAEQVLGALGARQRGPLPEGLAGSPHGAVDVRLARLGDLGEDLLGRRRDRLEDLAVGRLRELAVDEQAVGGGDVDDRAGLGSRCVLEYRGHGDQSTVT
bacteria_89814		10546.3	4746.19		1.15184	0.264727		1.35485e-05	7.57839e-05		Actinobacteria	ko:K06215	Catalyzes the formation of pyridoxal 5'-phosphate from ribose 5-phosphate (RBP), glyceraldehyde 3-phosphate (G3P) and ammonia. The ammonia is provided by the PdxT subunit. Can also use ribulose 5-phosphate and dihydroxyacetone phosphate as substrates, resulting from enzyme-catalyzed isomerization of RBP and G3P, respectively	pdxS	Pyridoxal 5'-phosphate synthase subunit PdxS		MVLFSAGGVATPADAALMRQLGAEGVFVGSGIFKSGDPAKRAAAIVKATTFYDDPKIIADASRNLGEAMVGINCDTLPETERYANRGW
bacteria_128962		5255.78	2364.89		1.152	0.362725		0.00149338	0.00457331		Actinobacteria				hypothetical protein		MKKLLLVALAAIGGLLVYRQIQADRAEQDLWTEATDSVPTGS
bacteria_164979		37370.5	16797.8		1.15358	0.194939		3.26574e-09	4.38492e-08		Actinobacteria		Alpha beta hydrolase		2-hydroxy-6-oxo-6-(2'-aminophenyl)hexa-2,4-dienoic acid hydrolase		MSSTGTPNEAVITAYAKAPARTVSAGGVTYAYRELGPKGGIPVVFFVHLAATLDNWDPRIIDPVAKGRHVIAFDNRGVGASTGQVPDSVEAMADDAYTFIKALGYDKIDVFSFSLGGMVAQALVVKHPELIRKLVLTGTGPKGGKDIDKVVGTTYWDILRATLTRSDPKEFLFFNRNSTGKPAARAFVNRLKERTVDRDAKIKTKAFQTQLKAIQKWGRSTPDDLSKITHRTLIANGDNDRMVPSVLSEDLHRRIKDSELIIYPDSGHGGIFQYYKEFAPVAVEFLGR
bacteria_173333		62354.3	28013.3		1.15437	0.171673		1.76515e-11	4.42413e-10		Actinobacteria				hypothetical protein		MHGAEGGVAVADGVDEDPDADQVVDLREVAAADDHLLVDAVVMLRAPGDGGLDPGRAQVGLHLVGHYGQVLVALGRPLGHQSYDLVVHLGIEDREGEVLQLPLDGVHAEAVGERSVDLQRLARLLLLLLPLEIAHGAHVVQAVGELDDQDAGVLGHRHDHLAHGLGLRGLAELDLVQLGDAVDEQGHGVAEVAAELVEAVLGVLDGVVQQAGHEGGGVHAELGEDRGHGEGVGDVRVATLALLAAVPALGDLVGLLDLAQCRRLDLRVVAAHYPQQGLQDRVVRVGALDAEAGETGTDAVGGAGTGGLARVRTGRGGRRRGALGRGGLGPGRFGRLVDGRRLGVLDRPAGVVRRALRVQRGLGRGRRGGLGLGGGEWLGLVWQEDSSCAIRVPGQAPET…
bacteria_119232		29228.3	13100.9		1.15768	0.259292		8.01483e-06	4.74923e-05		Actinobacteria	ko:K13527	AAA ATPase forming ring-shaped complexes	arc	Proteasome-associated ATPase		MESLFRTRGSGVSSDVENTIVPQLLAEIDGVEGLQNVVVIGASNREDMIDPAILRPGRLDVKIKIERPDAEAAKDIFQKYLTERLPLHSEDVGEHGGDKTTTVQSMIQTAVEHMYAESEENRFLEVTYANGDKEVLYFKDFNSGAMIENIVGRAKKMAIKDFLDHNQKGLRVSHLLQACVDEFKENEDLPNTTNPDDWARISGKKGERIVYIRTLITGKQGADTGRSIDTVANTGQYL
bacteria_271740		25804.7	11553.3		1.15931	0.195991		3.31676e-09	4.43658e-08		Actinobacteria	ko:K01715	Belongs to the enoyl-CoA hydratase isomerase family	echA12	putative enoyl-CoA hydratase echA8		MARVWLNRPHKKNCVTVPILERLDEIITEVDADPELRVLILRGRGNTFCSGFDLDSLQADFVGRSNAIDVAVLSAKVCDRLYSMRTPSIAVLEGHVTAGGFELMISCDFAIAADDALIGDFHIRRALFGGAGPIYRVPRMIGVRKTKELMLTGKLLTGVEAAQFDLINSSAPADKLDATVEEFADQLIDKSPFTMWITKMTIDRSLDADIQSLMVMEHLAVGVMLNSEDAAEGVAAFLEKREPQWKGR
bacteria_67472		23380.3	10455.5		1.16098	0.227294		3.259e-07	2.696e-06		Actinobacteria		Response regulator receiver		Transcriptional regulatory protein CseB		MVPESTPQGRAMEQTHTSHNGTTATPGAQRRVLVVEDDPTIVDAIATRLRAEGFLVQTAVDGPSAVDTAEAWQPDLLILDIMLPGFDGLEVCRRVQAARPVPVMMLTARDDETDMLVGLGVGADDYMTKPFSMRELAARVHVLLRRVERAVVAASTPRSGILRLGELEIDHAQRRVRVRSEDVHLTPTEFDLLVCLANTPRAVLSREQLLAEVWDWADASGTRTVDSHIKALRRKIGAERIRTVHGVGYALETPTP
bacteria_225632		12511.2	5594.4		1.16113	0.218249		1.03639e-07	9.70483e-07		Actinobacteria		conserved protein (small basic protein)	sbp	hypothetical protein		MIAVLGLVVGVVAGLLVRPEVPAVVEPYLPIAVVAALDAVFGGLRAMLDGIFDDKVFVVSFLSNVVVAALIVFLGDKLGVGAQLSTGVVVVLGIRIFSNAAAIRRHVFRA
bacteria_211169		15531.4	6938.94		1.16241	0.236093		8.49932e-07	6.38262e-06		Actinobacteria	ko:K00240	Succinate dehydrogenase and fumarate reductase iron-sulfur protein	sdhB	Succinate dehydrogenase iron-sulfur subunit		MRINGKNRLACKTLIKDINPEKPITVEAIKGLTVLKDLVVDMDPFFQAYRDVMPFLITKDTNEPTRERLQTAEDRERFDDTTKCILCAACTSSCPVFWNDGQYFGPAAIVNAHRFIFDSRDGAGEQRLEILNDRDGVWRCRTTFNCTDACPRGIEVTKAIQEVKRALITRRF
bacteria_354695		8629.27	3853.88		1.16287	0.318522		0.000261378	0.00103975		Actinobacteria	ko:K06215	Catalyzes the formation of pyridoxal 5'-phosphate from ribose 5-phosphate (RBP), glyceraldehyde 3-phosphate (G3P) and ammonia. The ammonia is provided by the PdxT subunit. Can also use ribulose 5-phosphate and dihydroxyacetone phosphate as substrates, resulting from enzyme-catalyzed isomerization of RBP and G3P, respectively	pdxS	Pyridoxal 5'-phosphate synthase subunit PdxS		MVLFSAGGVATPADAALMRQLGAEGVFVGSGIFKSGDPAKRAAAIVKATTFYDDPKIIADASRNLGEAMVGINCDTLPDSERYANRDW
bacteria_184070		25732.1	11483.9		1.1639	0.223942		2.02173e-07	1.75405e-06		Actinobacteria	ko:K02335	In addition to polymerase activity, this DNA polymerase exhibits 5'-3' exonuclease activity	polA	Flap endonuclease Xni		MAETAAKKTDTPSGESRPRLMLMDGHSLAYRAFFALPAENFTTATGQPTNAIYGFASMLANTLRDEAPTHFAVAFDVSRKTWRSEEFTEYKANRSKTPDEFKGQVELIGELLDAMHVSRFAVDGFEADDVIATLATQAEAAGFEVLIVTGDRDSFQLVSEHTTVLYPTKGVSELTRFTPEKVVEKYGLTPAQYPDFAALRGDPSDNLPGHPRRRREDGREVDQPVRFVRGARRAGRGGQGQGRAEPARPPGGRQAQPPPHRDGP
bacteria_326224		28626.4	12761.8		1.16547	0.239215		1.10429e-06	8.09997e-06		Actinobacteria	ko:K11717	Catalyzes the removal of elemental sulfur and selenium atoms from L-cysteine, L-cystine, L-selenocysteine, and L- selenocystine to produce L-alanine	sufS	putative cysteine desulfurase		MDHETEIVITEMEHHSNIVPWQLLSQRTGAKLKWFGLTDYGRLDLSYIDEIITEKTKIVSFVLVSNILGTVNPVEAIVRRAQEVGALVCIDASQAAPHMPLDVQALQADFVAFTGHKMCGPTGIGVLWGRQELLEDLPPFLGGGEMIETVSMHSSTYAPAPHKFEAGTPPIAQAVGLGAAIDYLSAIGMDKILAHEHALTEYAVRRLGEVPDLRIIGPTTAEDRGAAISFTLGDIHPHDVGQVLDEQGIAVRVGHHCARPVCLRYGIPATTRASFYLYSTTAEIDALVDGLEHVRNFFG
bacteria_228803		48761.9	21725.5		1.16634	0.215546		6.26476e-08	6.20159e-07		Actinobacteria	ko:K02982	Binds the lower part of the 30S subunit head. Binds mRNA in the 70S ribosome, positioning it for translation	rpsC	30S ribosomal protein S3		MGQKVNPHGFRLGITTDFKSRWYADKLYKDYVKEDVAIRKMMTQGMERAGISKVEIERTRDRVRVDIHTARPGIVIGRRGAEADRIRGELEKLTGKQVQLNILEVKNPEMDAQLVAQAVAEQLSSRVSFRRAMRKSMQGTMKAGAKGIKIQCGGRLGGAEMSRSEFYREGRVPLHTLRANVDYGFFEAKTTFGRIGVKVWIYKGDVKNIAEVRAENAAARAGNRPARGGAGGGSDRPARGGGRGGERGGRGRKPQQAPAAEAPKAEAPAAAAPAAESTGTEA
bacteria_339668		15903.2	7082.05		1.16707	0.192371		1.30499e-09	1.97933e-08		Actinobacteria		Short-chain dehydrogenase reductase sdr		3-oxoacyl-[acyl-carrier-protein] reductase FabG		MSVSDWDTVLNVHLRGSFLVTKAIQKHMVDAGFGRIVNLSSSSALGNRGQANYSAAKAGLQGFTKTLAIELGKFGITANAVAPGFIATDMTAATAERVGMGFDEFKAAAATQIPVARVGEPDDIANAIAFFTGEAAGFVSGQVLYVAGGPLD
bacteria_174009		48425.8	21559.4		1.16743	0.21433		5.12614e-08	5.17593e-07		Actinobacteria	ko:K06282	Small subunit		Periplasmic [NiFeSe] hydrogenase small subunit		MTRAEQEPGDRPQAQVEHDPVVHVLWMNGGLGCDGDSVALTAATQPSIEEIVLGGLPGLPRIAMHWPLLDFECGPDGGADSFIEWWHRADRGELDPFILVVEGSVPDETNKAEGYWCGFGTDPATGQPVTTSEWLDRLAPKATAVLAVGTCAGYGGIHAMAGNPTGAMGVPDYLGWDWKSHAGIPIVCVPGCPIQPDNFSETLTYLLYQAAGAAPMIPLDDKLRPTWLFGATVHEGCDRAGYYEQGQFALSYDSPTCLVKLGCWGPVVKCNVPKRGWMNGIGGCPNVGGICIACTMPGFPDKFMPFMDEPPGAKVSSGASGAYGAVVRKLRSITAKTVDKEPKWRRTGEKITTGYRPPW
bacteria_81776		32057	14259.5		1.16866	0.198124		3.66583e-09	4.84482e-08		Actinobacteria		PFAM Band 7 protein	qmcA	putative protein		MCSSDLIILVVLFFIALIKTIQVIPQASAAIVERFGRYTRTLNAGLNIVVPFIDSIRNRIDLREQVVPFPPQPVITQDNLVVNIDTVIYYQVTDARAATYEVASYIQAIEQLTVTTLRNIIGGMDLERTLTSREEINAALRGVLDEATGKWGIRVNRVELKAIEPPTSIQDSMEKQMRADRDKRAAILTAEGTRQAAILTAEGEKQSQILRADGEAKAAALRAEGEAQAVRTVFEAIHAGDPDQKLLSYQYLQMLPKIAEGDANKLWIVPSEIGDALKGLSGAMGNFGNFGGGSGGGNNSGNGGGGNERREKPSID
bacteria_167379		27641.7	12282.4		1.17019	0.185739		2.97295e-10	5.44374e-09		Actinobacteria	ko:K03578	ATP-dependent helicase	hrpA	ATP-dependent RNA helicase HrpA		MRFTDQVNQDATFVKLMTDGILLAEIQTDRELRAYDTIIIDEAHERSLNIDFLLGYLAQLLPKRPDLKVVITSATIDPERFSRHFGDAPIVEVSGRTYPVEVRYRPLLEDDSDDSDRDQITAICDAVEELQGEGKGDILVFLSGEREIRDTADALVKKNYPRAGGANGQGTEVLPLYARLSHAEQHRVFQQHTGRRIVLATNVAETSLTVPGIKYVIDPGFARISRYSHRTKVQRLPIEPV
bacteria_107132		28994.6	12879.5		1.17065	0.204319		1.00717e-08	1.21066e-07		Actinobacteria	ko:K00962	Involved in mRNA degradation. Catalyzes the phosphorolysis of single-stranded polyribonucleotides processively in the 3'- to 5'-direction	pnp	Polyribonucleotide nucleotidyltransferase		MALNPDHLYDVVAINAASASTQLAGLPFSGPIGGVRVALINGQWVAFPTHTELEDAVFDMVVAGRVLEDGDVAIMMVEAEATEKTITLIAGGAEAPTEEVVAAGLDAAKPFIKVLCKAQADLAAKAAKPVGEFPVFLDYQDDVYEALAAAVKGELSQALTIVSKQDLMPKSKTAYR
bacteria_33574		51291.6	22758.4		1.17229	0.177779		4.27849e-11	9.77744e-10		Actinobacteria	ko:K02433	Allows the formation of correctly charged Gln-tRNA(Gln) through the transamidation of misacylated Glu-tRNA(Gln) in organisms which lack glutaminyl-tRNA synthetase. The reaction takes place in the presence of glutamine and ATP through an activated gamma-phospho-Glu-tRNA(Gln)	gatA	Glutamyl-tRNA(Gln) amidotransferase subunit A		MTDIIKLTAAEIAARIASGDLTAVEVTEAHLARIEAVDEKVNAFLHVDREGALAQARAVDEKRAKGEKLGPLAGVPLALKDIFTTEGIPTTVGSKILEGWIPPYDATLTKRLKAADVVILGKTNMDEFAMGSSTENSAYGPTGNPWDLTRIPGGSGGGSSAALAAHMATLAIGTDTGGSIRQPAAVTGTVGVKPTYGAVSRYGMVAFSSSLDQGGPCARTVLDAALLHEVIAGHDPLDSTSIDAPVPAVVEAARNGSVEGMRVGVVKQFRGEGYQAGVIQRFDESVALLKELGAEIVELDCPSFDLALSAYYLIAPSECSSNLARFDGLRYGLRTGDDGSHSAEEVTSLTREAGFGPEVKRRIMLGTYALSSGYYDAYYGSAQKVRTLITRDFEKAFEQ…
bacteria_50313		11825.1	5243.82		1.17307	0.254268		3.95918e-06	2.54118e-05		Actinobacteria	ko:K02916	Belongs to the bacterial ribosomal protein bL35 family	rpmI	50S ribosomal protein L35		MPKNKSHSGASKRFKITGSGKVLRERAGKRHLLEHKSSRVTRRLTGTAEMAPGDAAKIKKLLGK
bacteria_258842		79004.9	34984.3		1.17521	0.190782		7.27506e-10	1.18589e-08		Actinobacteria				hypothetical protein		MLLLLQLHLGGGADLDHAHAAGQLREALLELLAVPVGVRVLDLGLDLVDAAGHGGAVATAVDDDRVVLRDGDAAGGAQHVEADLVELEADLLGDDLAAGERGHVAEHRLAAVTEAGGLDRDRVEGAADLVHDQGRQGLALDVLGDDQQRLRGVGLDDLLQQRQQVLDGGDLALVDQDVRVVEDGLHTLLVGHHVRGQVALVEGHALGEVELQTEGVGLLDGDDTVLADLVHRLGDELADLRVLRGERGHGGDVGLLLDRAGGREEFLGHSLDRRVDALLQGGRGGAGGDVLQTLADERLGQHGGGGRTVTRDVVGLGRHLLHQLGAEVLVRVVELDLAGDGDAVVGDGGSAELLVDDDVAALGADRHLDRVGKFVDAALKGATGVLVELQDLRHRSGSA…
bacteria_250715		9500.94	4204.53		1.17609	0.303797		0.000108254	0.000477138		Actinobacteria	ko:K01858	myo-inositol-1-phosphate synthase	ino1	Inositol-3-phosphate synthase		MAWLDDRKWAYVRLEGRAFGDVPLNLEYKLEVWASPNSAGVIIDALRAAKIAKDRGIGGPILSASSYFMKSPPVQYFDDEAYDNVEKFIRGEVER
bacteria_94666		18663.6	8235.71		1.18026	0.212383		2.74123e-08	2.94274e-07		Actinobacteria	ko:K03070	Part of the Sec protein translocase complex. Interacts with the SecYEG preprotein conducting channel. Has a central role in coupling the hydrolysis of ATP to the transfer of proteins into and across the cell membrane, serving as an ATP-driven molecular motor driving the stepwise translocation of polypeptide chains across the membrane	secA	Protein translocase subunit SecA		MSVLSKIMRAGEGKILRKLHRIADQVNSIEEDFVDLSDAELRALTDEYKQRYADGESLDDLLPEAFATVREAAKRALGQRHYDVQIMGGAALHLGYVAEMKTGEGKTLVGTLPTYLNALSGDGVHLITVNDYLAERDSEMMGRVHKFLGLTVGCILANMTPAQRREQYACAIRTISATCRR
bacteria_210847		18418.8	8091.33		1.18669	0.226972		1.71042e-07	1.52028e-06		Actinobacteria	ko:K01952	Part of the phosphoribosylformylglycinamidine synthase complex involved in the purines biosynthetic pathway. Catalyzes the ATP-dependent conversion of formylglycinamide ribonucleotide (FGAR) and glutamine to yield formylglycinamidine ribonucleotide (FGAM) and glutamate. The FGAM synthase complex is composed of three subunits. PurQ produces an ammonia molecule by converting glutamine to glutamate.…	purQ	Phosphoribosylformylglycinamidine synthase subunit PurQ		MEPLIEQAKAGLPVLGICNGFQILTEAHLLPGGMLGNDHLHFICRDQKLRVENAETAWTADYEAGQEIHIPLKNMDGRYVADEYTLDKLEAEGRVAFRYVVGGEAVDGYGNPNGSLRDIAGITNEAGNVVGLMPHPEHAVEPLIGSGRTDGLPFFTSILKKLVNA
bacteria_00846		14107.2	6182.48		1.19015	0.230231		2.349e-07	2.00322e-06		Actinobacteria	ko:K04078	Binds to Cpn60 in the presence of Mg-ATP and suppresses the ATPase activity of the latter	groS	10 kDa chaperonin		MTTTSSKVAIKPLEDRIVVQPLDAEQTTASGLVIPDTAKEKPQEGVVLAVGPGRFENGERLPLDVSVGDVVLYSKYGGTEVKYNG
bacteria_216168		11995.3	5254.25		1.19088	0.29011		4.04456e-05	0.000200639		Actinobacteria				hypothetical protein		MLDGELAARDNAFGLVTDVEQDLVPVDLHDDAVDDVAVVEVLDRFVDRGEESFLVTDVVDRNLRGGGGGLGAARHVGKGSGYGQKVVGTATPGARVALKKPDSQGRAPPANW
bacteria_271419		21186.4	9277.19		1.19146	0.286438		3.18859e-05	0.000161996		Actinobacteria				hypothetical protein		MTELGVVVGVDLAVERGEVAVFQHGERVQLDQRQVLLVEQLVQAQHDFRQLVDLLAVEVHREAELAALVRLQPFDEVDHDGVDVFGRVLGDLLDVHAAVLGGDERDGLGITIHQDRQVQLAGDVGGIGDQHQVHRQRAAGRLVGFHVGAEHALGGGAHVVEAAAELDAAGLAAAAGMDLCLDHPLGTTERLGGIDSSVGGVGDLARRHGDAVLREQFFGLVFVEIHSIPRANGETWRPHASTLRGS
bacteria_178784		9223.14	4036.01		1.19221	0.250429		1.92949e-06	1.33284e-05		Actinobacteria	ko:K02963,ko:K03111,ko:K15125	Binds as a heterodimer with protein S6 to the central domain of the 16S rRNA, where it helps stabilize the platform of the 30S subunit	rpsR	30S ribosomal protein S18 1		MLRKFISDRGKIRARRVTGNCTQHQRDVATAVKNSREMALLPYTAQAR
bacteria_306039		26379.2	11540.5		1.19268	0.324476		0.00023719	0.000954051		Actinobacteria				hypothetical protein		MRTTLDVVESRLVGCDHAGARARFDRHVAHRHARFHRKVLDGAAAVLQHIALSATGTDLRDDGENDVLRRDAGPRLAVDVDRHRLERTQRQRLRRHHVFHLGGADAERQRAERTVRGRVAVPADNGHAGLREAELRAHHVDDALLHITHRVQAHAELRAVAAKRLDLRARHEVRDRLVDVDGRNVVVLGGDREIGPPQPSPGETQPVERLRTRDFVEQVEVDVEQVRLRTTAVAHNVCLPHLLRERAAHRDISHIMDAPTGLDFSLSGKLVSACGTA
bacteria_218975		58836.8	25722.8		1.19366	0.31052		0.000121005	0.000522818		Actinobacteria				hypothetical protein		MPVRPAVALHTDAADVREQHDRALPDRAVETRRGQLLAGDGVGLAQRVEALLVDRADDPDAEARAGERLALHDGLRQAQFGADAADLVLEQRAQRFDQLELQVVRQAADIVVRLDVRGARAAARLDDVRVERALDEEAVVALGLEVALCLLEHTDELASDDLALLLRVRDAGESVEEPLTGVDGHQVDARGGHVVALDLGALAGAQQTVVDEDAGEAVADGALDQSRGDSGVDAAGQAADGLAVTDLLADPGDLLVHDGRRRPLRTNARDVVQEPAQHLLAVRRVVHLGVVLHTGEPALLVLERGDRRALAGRGDGEALRRLGDGVAVAHPHRVARGELLVQRAALGGHAEVRASVLAGTGLFNRATECARHGLEAVADAEDRDAGLEQLRVDLRRVLL…
bacteria_311364		6620.84	2884.51		1.19859	0.242577		7.77037e-07	5.88271e-06		Actinobacteria	ko:K01902	Succinyl-CoA synthetase functions in the citric acid cycle (TCA), coupling the hydrolysis of succinyl-CoA to the synthesis of either ATP or GTP and thus represents the only step of substrate-level phosphorylation in the TCA. The alpha subunit of the enzyme binds the substrates coenzyme A and phosphate, while succinate binding and nucleotide specificity is provided by the beta subunit	sucD	Succinate--CoA ligase [ADP-forming] subunit alpha		MGHAGAIVSGSSGTAAAKKEALEAAGVKVGKTPTETAKLAREILAG
bacteria_88469		34279.9	14928.9		1.19922	0.197382		1.23504e-09	1.88468e-08		Actinobacteria	ko:K03088	belongs to the sigma-70 factor family, ECF subfamily	sigH	ECF RNA polymerase sigma factor SigR		MGSTFCPRRTSRADLDWTVLHAAKTTPIRGAAGTGSRLSSNSGGIGFDAARNLEEVGPVTGIDAGTDNGQAEQPEGQGASTESTAERTARFERDALEFLDQMYSAALRMTRNPADAEDLVQETYAKAYASFHQFREGTNLKAWLYRILTNTFINSYRKKQREPQRSAAEEIEDWQLARAESHMSTGLRSAESQALDHLPDSDVKEALQAIPEEFRIAVYLADVEGFAYKEIADIMGTPIGTVMSRLHRGRRQLRGMLEDYARDRGLVPAGAGESNEAKGSGS
bacteria_246774		19670.9	8542.45		1.20327	0.262253		4.47047e-06	2.82927e-05		Actinobacteria	ko:K01239,ko:K08234	glyoxalase bleomycin resistance protein dioxygenase	gloA	hypothetical protein		MAIQRMDNVGIVVEDMDAAVAFFVELGMELEGRGEVEGPFADQCTGLDGVRCDIAMMRTPDGHSRLELAKYRSPEVISAGPRNRPHNILGTHRVMFAVDDIEDTVARLRPHGAELVGEIARFEDVYLLCYLRGPEGIIVGLAEQLR
bacteria_110540		15011.7	6510.83		1.20513	0.249101		1.312e-06	9.47018e-06		Actinobacteria	ko:K06945	ATP- GTP-binding protein		hypothetical protein		MVAGGFGVGKTTFVGAVSEINPLRTEAVMTSASAGIDDLTHTGDKTTTTVAMDFGRITLDQDLILYLFGTPGQDRFWFMWDDLVRGAIGAVVLVDTRRLADCFPAVDYFENSGLPFVVALNGFDGHQPYAPEEVREALQIGPDAPIITTDARHRSDAKSALITLVEHALMARLR
bacteria_41892		8651.54	3745.63		1.20761	0.452298		0.00758646	0.0171598		Actinobacteria				hypothetical protein		MTVSKNINNPVGMGGGQRKKLSRAERQNNGPHRNLDRQCAADRKAELVRKMREKAGAAEGAGQAGDDTAQS
bacteria_340937		34081.3	14703.5		1.21278	0.217284		2.38393e-08	2.59704e-07		Actinobacteria	ko:K02358	This protein promotes the GTP-dependent binding of aminoacyl-tRNA to the A-site of ribosomes during protein biosynthesis	tuf	Elongation factor Tu		MITGAAQMDGAILVVAVTDGPMPQTKEHVFLVRQVGVPYIVVALNKADMVDDEEILELVELEVRELLSEYEYAGDDLPVVKVSALKALEGDKEWGQSVLNLMAAVDESIPQPERDVDKPFLMPIEDVFTITGRGTVVTGRIERGVLKVNETVDIVGIKTEKTTTTVTGIEMFRKLLDEGLAGENVGLLLRGIKREDVERGQVIIKPGSVTPHTEFEAQAYILSKDEGGRHTPFFNNYRPQFYFRTTDVTGVVTLPEGTEMVMPGDNTEMKVELIQPVAMEEGLKFAIREGGRTVGAGQVTKINA
bacteria_344563		17109.7	7380.97		1.21286	0.254479		1.87867e-06	1.30436e-05		Actinobacteria	ko:K02838	Responsible for the release of ribosomes from messenger RNA at the termination of protein biosynthesis. May increase the efficiency of translation by recycling ribosomes from one round of translation to another	frr	Ribosome-recycling factor		MFNKIVADYYGAPTPINQLASFSVPEPRMAVVTPFDKTALRNIEQAIRDSDLGVNPSNDGNIIRVVFPELTEERRRDYIKVAKGKGEDAKVSIRAVRRKAKDAIDKLIKDGEVGEDEGRRAEKELDDTTAKYVAQVDELLKHKESELLEV
bacteria_91632		51279	22099.2		1.21435	0.227634		9.57321e-08	9.0556e-07		Actinobacteria	ko:K00341	NADH ubiquinone oxidoreductase subunit 5 chain L Multisubunit Na H antiporter, MnhA subunit	nuoL	NADH-quinone oxidoreductase subunit L		MGLSIAIMLMFTTFGTFAFGPLLGTEGEPGIAGDATEGKLTAIALMLLLAACGKSAQVPLQSWLGDAMEGPTPVSALIHAATMVTAGVYLIVRSAAVFNGAPDAQLVVTVVGAVTLLFGAIVGCAKDDIKKALAGSTMSQIGYMVLAAGLGPIGYVFAIMHLVTHGFFKAGLFLGAGSVMHGMNDEVDMRKYGGLRKYMPVTFVTFGLGYLAIIGFPGLSGFFSKDKIIEAAFAKGGTEGWILGGCALLGAAITAYYMTRVMLMTFFGEKRWQPDADGHEPHPHESPKSMTIPMIVLAFGSVFAGGFFSIGDRFLHWLEPVTGHSHGDSPVSALTVTLATMVVLVIGVAIAYAQYGRRPVPVLAPRGSLLTRAARRDLFQDDFNHVVLVRGGEHLTRSL…
bacteria_12612		13912	5983.91		1.2171	0.383963		0.00152527	0.00464682		Actinobacteria	ko:K06893	SnoaL-like domain		hypothetical protein		MSDFATAPADVVRRQYLASAAGDLDALRATLAPDVEWTEMAGFPLAGTYRTPEGVTANVMEKLAAEWECWTAHDDTYVVDGENVVVLARYTAVNKATRKPIDVRVAHHFTVRGGAIVRFEQFTDTALVLAAMTA
bacteria_347092		64206.2	27515.6		1.22244	0.236518		2.36016e-07	2.0108e-06		Actinobacteria				hypothetical protein		MCSSDLTLLSSQGTDASFVLTLAGFPPDVFVRCFFLFLRFRLYQTVSSADFLGAFQVLRFRVFPFRRFRLYQILSGLIPSQRGSSSRPLGRSDELNSSGILAPELIGGRPFERGFLIPQKHAPKPRRRIADSLVDSCGMAVRGPTEVDSGAGQLGGHYVPRARGVNSAPEGLPQPVGAALRRAVMQVLMACWSSSSRWTMSSS
bacteria_178430		7410.13	3172.33		1.2239	0.292874		2.92866e-05	0.000149738		Actinobacteria	ko:K01267	M18 family aminopeptidase	apeB	M18 family aminopeptidase 2		MSEPSRFDRGHTDDLMTFLTASPSPYHAVANAAERLEKAGFRQVSETDAWEGTSGGKYVLRGGAIVAWYVP
bacteria_120466		13939.5	5954.38		1.22705	0.274761		7.97465e-06	4.72859e-05		Actinobacteria	ko:K00164,ko:K01616	Dehydrogenase E1 component	sucA	hypothetical protein		MTMRLSKSSFTGTARTDVAVGTSIEAFMFFATAADGPRSVTKNMNASIEVPTATSVRAVPVKLLFDNRIVINNHLKRARGGKISFTHLIG
bacteria_137035		21333.5	9109.05		1.22773	0.233679		1.48888e-07	1.34777e-06		Actinobacteria		Short-chain dehydrogenase reductase sdr		Glucose 1-dehydrogenase 4		MQGDAAELDDLDRLYDTVKREKGSIDVLWASAGMGEPAVLGEITEEQFHRAFWLNARGTLFTVQKALPLINDNGSILMTGSNASLGAFPGWSLYAGSKAVQQAWARVWLNELRDRRIRVNVLTPGQVATAKQEELFDEATRAAFESLIPRGAMGRPEEIAAVALFLASDDSSYVNGLELVADGGTTAI
bacteria_293294		13965.2	5961.98		1.22785	0.273989		7.41542e-06	4.42153e-05		Actinobacteria	ko:K00248,ko:K11410,ko:K18244	acyl-CoA dehydrogenase	yngJ	Acyl-CoA dehydrogenase		MDESVKYAKEREAFGRPIGANQAIQFKIADMEMKSHTARLAWRDAASRLVAGEPFKKEAAVAKLYSSTIAVDNARDATQIHGGYGFMNEYPVARMWRDSKILEIGEGTSEVQRMLIARELGLPG
bacteria_323087		16818.2	7174.96		1.22887	0.244788		5.16298e-07	4.07822e-06		Actinobacteria		ABC transporter	yjjK	Energy-dependent translational throttle protein EttA		MAEYIYTMRKTRKAHGDKVILDDVTLSFLPGAKIGVVGPNGAGKSTVLKIMAGLEQPSNGDAFLSPGYSVGMLLQEPPLDESKTVLENVQDGAAEIMGKLKRFNEVAELMATDYSDALLDEMG
bacteria_251088		16288.3	6942.74		1.23021	0.43308		0.00450269	0.0113337		Actinobacteria		Short-chain dehydrogenase reductase sdr		Rhamnolipids biosynthesis 3-oxoacyl-[acyl-carrier-protein] reductase		MWREPLETFPDEAWDAVLDLNLKSPFWLVQALLPALRRAGTADDPARIINIGSIAAIHVAESPNYSYASSKAALHQLTRVLARELGPQHVTVNAVAPGPFPSQMMASTLDAIGDTIAAKAPLRRLGRDDDMAGIAVFLASQAGAYLTGTIIPVDGGIATTATGT
bacteria_22965		27308.5	11637.4		1.23051	0.216524		1.32318e-08	1.55456e-07		Actinobacteria	ko:K01069,ko:K21029,ko:K21147	The proteins in this cluster have high sequence similarity to MoeB and are possibly involved in the synthesis of molybdopterin, but there has been no biochemical or physiological characterization. There is also no genetic linkage to other molybdopterin cofactor synthesis proteins. These proteins are	moeB	putative adenylyltransferase/sulfurtransferase MoeZ		MVEDAPCYRCLYPEPPPPGMVPSCAEGGVLGVLCASIGSIQVNEAIKLLAGIGEPLVGRLMIYDALEMQYRQVKVRKDPDCAVCGENPTVTELIDYEAFCGVVSEEAQQAAAGSTITPKQLKEWIDDGESIEIIDVREPNEYEIVSIPGAKLIPKNEFLMGTALEGLPQDKKIVLHCKTGVRSAEVLAVLKSAGFSDAVHVGGGVIGWVHQIEPSKPVY
bacteria_359525		24388.9	10384.7		1.23172	0.210344		4.74961e-09	6.11257e-08		Actinobacteria	ko:K00033	6-phosphogluconate dehydrogenase	gnd	6-phosphogluconate dehydrogenase, NAD(+)-dependent, decarboxylating		MQLGLIGLGKMGGNMRERIRRAGHTVIGYDRNPEVTDVKSLAELVEQLEAPRVIWVMVPAGPATQSVVDELGGLLSPGDTVVDGGNSRWTDDEKHAAELGAKDIGFVDAGVSGGVWGLENGYALMVGGEKAHVERLQPIFEALKPEGPYGYVHAGKVGAGHFSKMVHNGIEYAMMQAYAEGWELLEKVDSVDNVREVFRSWQDGTVIRSWLLDLAVNALDEDEHLERMTVPSCQDRKTSRTSVTESTFSSSSQPSA
bacteria_209198		13124.6	5584.32		1.23282	0.294611		2.85719e-05	0.000146635		Actinobacteria	ko:K13821	Proline dehydrogenase	putA	hypothetical protein		MISGERPETPVETMRASGVRPSSRALVSLMMTSAAAPSLSGQQLAAVTMPSGRKTGFRPWTPSRVTPARGPSSLETTVPSGSVTGVISRSQKPFLRASSARFCERTPNSSMSWRVTPFTRARFSAVCPMAM
bacteria_337405		39148.6	16652.8		1.23316	0.22443		3.91566e-08	4.0652e-07		Actinobacteria	ko:K03307	Belongs to the sodium solute symporter (SSF) (TC 2.A.21) family	yodF	Monocarboxylate transport permease protein		MKDGVNGVALGVFIFFFLAVTVLGFLAARWRRADNEHSLDEWGLGGRSFGTWVTWFLLGGDLYTAYTFVAVPAAIYAAGAAGFFAVPYTILVYPLIFTFLPRLWSVSHKHGYVTTSDFVRGRFGSKGLSLAVAVTGILATMPYIALQLVGIQAVLDVMGVGGGEDTNWFVKDLPLLIAFGVLAAYTYSSGLRAPALIAFVKDTLIYIVIVVAIIYIPIKLGGFDDIFAKANDAFAQPNPATGKPRGALAPAEPGQWTYATLALGSALALFMYPHSITATRSS
bacteria_43657		34477.4	14663.8		1.23335	0.210435		4.60214e-09	5.94009e-08		Actinobacteria	ko:K00088	IMP dehydrogenase	guaB	putative oxidoreductase/MSMEI_1564		MTEIEIGRGKRGRRAYAFDDIAVVPSRRTRDPKEVSIAWQIDAYRFELPFLAAPMDSVVSPATAIRIGELGGLGVLNLEGLWTRYEDPQPLLDEIAGLDVDAATRRLQEIYSAPIKEELIGARIKEVRDSGVVTAAALSPQRTAQFSKAVVDAGVDIFVIRGTTVSAEHVSGSHEPLNLKQFIYELDVPVIVGGCATYTAALHLMRTGAAGVLVGFGGGAAHTTRNELGIQVPMATAVADVAAARRDYMDESGGRYVHVIADGGVGWSGDLPKAIACGADAVMMGSPLARATDGPGKGHHWGMEAVNEELPRGKKVDLGTVGTIEEVLTGPSHTPDGSMNLFGALRRAMATTGYSELKEFQRVEVTVADSQHKR
bacteria_363258		76430.4	32471		1.23499	0.204392		1.51984e-09	2.2417e-08		Actinobacteria				hypothetical protein		MRVHDVLTLGQVAQLDLAGLEPLGVRLLDGELGLDLVVLDDAVLGGVDEEHPAGLEAALADDLGGVDVEDADLGAEDDEAVVGDPVAAGAKAVAVEDRADLLAVGEGDTGRTVPGLHQVGVELVEGAAERLHGVVVLPRLRDHHQHGVRQRTAAQVQEFEHLVEGRRVGGVRRTDREDALEGLVVVAEEVRDQLGLAGRHPVAVALDGVDLTVVRDEAVRVRERPRREGVRGEPGVHERDRGGEAAVGQVREEGLQLAGGQHALVDDRARGERREVDVDLALGALAQHKGLAVEVDVRSRHSGAVADEDLVERRHRRAGGGAEQLGGDRDLAPAEDGEALLDGDRLDARDGVLDAVLRQEGGTDGVRTGRRQLEAGDLTEEGVRNLGQDARAVTRVGLG…
bacteria_156115		61974.6	26322.7		1.23534	0.181759		1.07144e-11	2.78009e-10		Actinobacteria	ko:K03168	Releases the supercoiling and torsional tension of DNA, which is introduced during the DNA replication and transcription, by transiently cleaving and rejoining one strand of the DNA duplex. Introduces a single-strand break via transesterification at a target site in duplex DNA. The scissile phosphodiester is attacked by the catalytic tyrosine of the enzyme, resulting in the formation of a DNA-(5'…	topA	DNA topoisomerase 1		MKDATGNSVTVKIGGAAADGRDVEFSASGKTITFHGFLKAYVEGADDPNAELDDRERRLPQVSEGDPLTAEEITVDGHATKPPARYTEASLVKELEEREIGRPSTYASIIGTILDRGYVFKKGTALVPSFLSFAVVNLLEKHFGRLVDYDFTAKMEDDLDRIANGEAQSVPWLRRFYFGEGAAEGRAADAGNGDGDHLGGLKELVTDLGAIDAREVSSFPVGNDIMLRVGRFGPYIERGEKGAEGHQRADIAEELAPDELTLEMAEELLAAPSGDFELGADPATGHQIVARKGRYGPYVTEVLPEGTPKTGKNAVKPRTASLFKSMSLDTVTLADALKLMSLPRVVGADAEGQEITAQNGRYGPYLKKGTDSRSLQTEDQLFTITLEEALAIYAQPKQR…
bacteria_182428		30021.3	12745.9		1.23598	0.174927		1.59831e-12	5.11633e-11		Actinobacteria		Response regulators consisting of a CheY-like receiver domain and a winged-helix DNA-binding domain		putative transcriptional regulatory protein TcrX		MNNPRLRGSGRPALTRTDGAPLRVLVVDDDPDLAEVLSGALRYEGWEVRTAGDGVSAVAEAGELLPDAVVLDVMLPDTDGFAVLRSLHAVRPDVCVLFLTARDAVEDRIAGITAGGDDYVTKPFSLEEVVARLRGLLRRAGMARQQEEGPRLTVGDLVMDEEAREVTRGGELIELSPTEFELLRFLMRNPRRVLSKAQILDRVWSYDFGGQAHVVELYISYLRKKVDAGREPMIHTVRGAGYVLKPVTVR
bacteria_256038		23444.3	9947.55		1.23683	0.185745		2.76207e-11	6.59536e-10		Actinobacteria				hypothetical protein		MQDRGQRDRVGQVALVDHDDLRDVRGTDLAEHLTDRLDLGQRVGVRTVDHVQQQIRVRDLLQRRAERLDDVVRQVPDEPDRVGEGVHAAVGRRRPPGGRVQRREQGVLDQDTGSGDLVQQRGLARVRVARDRDRGDRVPAALLAHRRPRALHVLQLTAELGDLGVDPAPVGLDLGLTGTTATDTATGRADASTGLAGQVATPTTQALLHVLQLGQLDLGLAFLALRVLREDVQDQRGPVDHLDLELVLQVAQLRGGQLTVGDHRVGAE
bacteria_77157		8680.31	3683.05		1.23685	0.395743		0.00177576	0.00526207		Actinobacteria	ko:K06893	SnoaL-like domain		hypothetical protein		MERLGADWDGWAAHDDTYVVDGENVVVLARYTAVHKTTGKHLNARVAHHFTVRGGLIVRFEQFVDTALVRDAATPDS
bacteria_309528		43493.1	18449.6		1.23718	0.211044		4.56767e-09	5.90422e-08		Actinobacteria	ko:K01647	Belongs to the citrate synthase family	gltA	Citrate synthase 1		MREDVSDNSVVLRYGDGEYTYPVIDSTVGDKGFDIGKLRAQTGLVTLDSGYGNTAAYKSAVTYLDGEAGILRYRGYPIEQLAERSTFLEVAYLLINGELPSVDELSVFKNDITQHTLLHEDVKNFYRGFPRDAHPMAMLSSVVSALSTFYQDSHNPFDEKQRNLSTIRLLAKLPTIAAYAYKKSIGHPFVYPRNDLGYVENFLRMTFSVPAQEYEPDPVVVSALDKLLILHADHEQNCSTSTVRLVGSSQANMFASISAGINALWGPLHGGANQSVLEMLEGIQASGGDVDSFIRKVKNKEDGVRLMGFGHRVYKNFDPRAKIIKAAAHDVLSALGKSDELLDIALKLEEHALSDDYFVSRSLYPNVDFYTGLIYRAMGFPTEMFTVLFALGRLPGWIA…
bacteria_377862		9866.47	4182.94		1.23792	0.338247		0.000252418	0.00100887		Actinobacteria	ko:K02112	Produces ATP from ADP in the presence of a proton gradient across the membrane. The catalytic sites are hosted primarily by the beta subunits	atpD	ATP synthase subunit beta		MERFLSQNTHVAKQFTGVDGSDVPLDESIVAFNAIIDGDYDHFPEQAFFLCGGIEDLKANAKELGVS
bacteria_189294		26749	11341		1.23793	0.540604		0.0220276	0.0398106		Actinobacteria				hypothetical protein		MAPLHGAVALEEVDHVALAVGEDLHLDVAWFDHGLLEEHRRVTERRLRLARRRLQRLAQRGRVVDLAHATATTAGDGLHEHGEAHRLRRFEQLVDVRRRLARLQHRQPGLAGGGDGARLVAGELQHLGDGADEREPCLATGQRELGVLRQEAVAGVDRVGPRLAGGLDDLVDGEVGADGMPWLTDLVRLVSLQPVQRVAVLVRENGDRSRAQFVGGTERANRDLAAVGDKNLAEHP
bacteria_356287		15748.4	6673.78		1.23864	0.249877		7.15847e-07	5.48025e-06		Actinobacteria		ATP- GTP-binding protein		hypothetical protein		MRDPLSVLTDAFTSFLFGKVETTRLPVRTSTGQAQAVYLPTAAPGLGDSGVIIGREVYSGKGYIYDPFQLYGQQLPAPHWLVLGESGNGKSALEKTYVLRQLRFRDRQVVVLDAQGEDGVGEWNLIAQALGIE
bacteria_355414		16297.7	6895.7		1.24084	0.213316		5.99437e-09	7.56575e-08		Actinobacteria		Belongs to the prokaryotic molybdopterin-containing oxidoreductase family	fdhF	putative oxidoreductase		MIPGFEDFNARVAHPGGFTLPHAPRDERRFPTATGKANFTAAPVEYPELPEGRLLLQTLRSHDQYNTTIYGLDDRYRGIKNGRRVVLVNPEDADRLRLADGSYVDLVSEWKDGVERRAPGFRVVHYPTARGCAAAYYPETNVLVPLDATADTSNTPASKSVVVRLEQSATD
bacteria_168548		9699.98	4103.84		1.2409	0.20361		1.09793e-09	1.70479e-08		Actinobacteria	ko:K04063	organic hydroperoxide resistance protein	ohr	Organic hydroperoxide resistance protein OhrB		MELGGNGQGTNPEQLFAAGYAACFGSALGLVGRQAKVDVSDAAVTAEVGIGKQGEGFGLKVALRVELPDSVDQETGRKLVEQAHQVCPYSNATRGNIEVELVIE
bacteria_327536		22159.6	9369.52		1.24183	0.228472		5.46916e-08	5.48468e-07		Actinobacteria		Xylose isomerase domain protein TIM barrel		hypothetical protein		MWGDGDPEGVRQRAAHRMKDTARAARAFGVDTVIGFTGSAIWHLVAMFPPAPESMIERGYEDFAERWNPILDVFDAEGVRFAHEVHPSEIAYDYWTTRRALEAVDHRPAFGLNFDPSHFVWQDLDPVGFLHDFRDRIYHVDCKEARKRLDGRNGRLGSHLPWGDPRRGWDFVSAGHGDVPWEDVFRMLRSIDYQGPISVEWEDAGMDRLQGAPEALAHLKRFDFDPPSASFDAAFGN
bacteria_372645		14065.8	5942.15		1.24304	0.279247		8.53058e-06	5.00611e-05		Actinobacteria		Domain of unknown function (DUF1772)		hypothetical protein		MGVAFVMNPILNALPEDSGQLGHAHGGRMLGAVMPVWYIGSLVLAAVWAIAGRHHDGAGLVVIAGALLILSVVMSILLLVPINNRNKTWTPETRPADWKQQLNRWERLHYVRVAVIVAAFALLVTALT
bacteria_283949		16346	6892.7		1.24571	0.25725		1.2828e-06	9.27078e-06		Actinobacteria	ko:K03637	Catalyzes the conversion of (8S)-3',8-cyclo-7,8- dihydroguanosine 5'-triphosphate to cyclic pyranopterin monophosphate (cPMP)	moaC	Cyclic pyranopterin monophosphate synthase 2		MSTQDRLTHIDEAGAARMVDVSGKDVTARTARASGRVLVSPRVIELLRGEGVPKGDALATARIAGIMGAKRTPDLIPLCHPLSVSGVTLDLSVADDAVEIRATVKTTDRTGVEMEALTAVSVAALTVIDMVKAVDKGAVITDVRVEEKTGGKSGDWSRA
bacteria_37439		28482.4	12002.2		1.24674	0.227832		4.4451e-08	4.55069e-07		Actinobacteria				hypothetical protein		MFLTCPVRFLNAVLTESVRSFHVPAAPGTCACPPSSPSTPISRATRVTSAPNADSWSTIPLTVFFSSSISPATSTLTFCDRSPLATAVVTAAMSRTWVVRFRKTVLTESVRSFHVPAAPGTFACPPSRPSPPTSLATRVTSSANVRSVSVIWLIVSASWATSPRAETVTFCDRSPLATAVVTCAIPRTWAVRLPAIRFTESVRSFHTPSTPGTCACPPSSPSVPTSRATRVTSEENDDS
bacteria_94237		13476.9	5657.25		1.25225	0.269741		3.44328e-06	2.24761e-05		Actinobacteria	ko:K00335	NDH-1 shuttles electrons from NADH, via FMN and iron- sulfur (Fe-S) centers, to quinones in the respiratory chain	nuoF	NADH-quinone oxidoreductase subunit F		MFTDEHLDVPLDYEGVGAAGSMLGTKALQCFDETTCVVRAVTRWTEFYAHESCGKCTPCREGTYWLVQLLRDIEAGKGVMSDLDKLNDIADNINGKSFCALGDGAASPIFSSLKYFREEYEDHITGRGCPFDPAKSTAWADRTEVNA
bacteria_245530		34655.1	14543.9		1.2526	0.232873		7.49393e-08	7.28542e-07		Actinobacteria	ko:K01626	Belongs to the class-II DAHP synthase family	aroH	Phospho-2-dehydro-3-deoxyheptonate aldolase		MAAVAKGEAFLLQGGDCAEAFDAVGAEQIRAKLKTLLQMGAVLTYAASVPVVKVGRIAGQYSKPRSKNTETRDGVTLPTYRGDSVNGFEFNEKARIPDPERLKRMYNASASTLNLVRAFTTGGYADLRQVHAWNQDFVKSSPSGQRYEQLAREIDNALNFMRACGTDPAEFQTVEFYASHEALLLDYESALTRVDSRTGNLYDVSGHMVWIGERTRQLDGAHIEFASQIRNPIGIKLGPTTTAEDALQYIERLDPDREPGRLTFIVRMGADKVRDKLPELVEKVTASGATVAWITDPMHGNTYEAASGHKTRRFDDVLDEVKGFFEVHKALGTHPGGIHVELTGDDVTECVGGGDEIFVDDLHQRYETACDPRLNRSQSLDLAFLVAEMYRDQ
bacteria_217772		8697.23	3646.49		1.25401	0.203509		7.18561e-10	1.17347e-08		Actinobacteria		Protein of unknown function (DUF3117)		hypothetical protein		MAAMKPRTGDGPLEVTKEGRGIVMRVPLEGGGRLVVELTPDEADALGDALKKVVG
bacteria_342956		31503.7	13178.6		1.25734	0.186814		1.69167e-11	4.24601e-10		Actinobacteria	ko:K03040	DNA-dependent RNA polymerase catalyzes the transcription of DNA into RNA using the four ribonucleoside triphosphates as substrates	rpoA	DNA-directed RNA polymerase subunit alpha		MLIAQRPSLSEDVVADNRSRFVIEPLEPGFGYTLGNSMRRTLLSSIPGAAVTSIRIDGVLHEFSTIPGVKEDVTEIILNIKGLVVSSEHDEPVVMYLRKQGSGPVTAADIAPPAGVEVHNHDLHIATLNGKGKVEMELTVERGRGYVSAVQNKQQGQEIGRIPVDSIYSPVLKVTYKVEATRVEQRTDFDKLIVDVETKQAMRPRDAMASAGKTLVELFGLARELNIDAEGIDMGPSPTDAALAADLALPIEELELTVRSYNCLKREGVHSVGELVARSEADLMDIRNFGAKSIDEVKAKLAGMGLGLKDSPPGFDPTAAADAFGANNDADAGFVETEQY
bacteria_317955		17994.6	7525.23		1.25772	0.175701		8.16858e-13	2.93969e-11		Actinobacteria	ko:K07478	ATPase related to the helicase subunit of the Holliday junction resolvase	ycaJ	putative AAA domain-containing protein		MKYDRDGDQHYDVASALIKSIRGSDVDAALHYLARMIEAGEDPRFIARRLMISASEDIGLADPNALPIAVAAAQAVAMIGFPEAALTLSHATIALALAPKSNAATTAIGAAMEDVRKGLAGPVPPHLRDGHYKGAAKLGHAQGYVYPHDLPEGIAEQQYAPDAIKDREYYEPTRHGAEARYADAVEWTRKHLGRKRS
bacteria_145419		16328.8	6823.24		1.25883	0.229763		4.28198e-08	4.39898e-07		Actinobacteria		Required for morphogenesis under gluconeogenic growth conditions	ybhK	Putative gluconeogenesis factor		MDTVRGQATVALTPGEVQSVHLVPHDPPAVPEAVEAVLYADWVVLGPGSWFSSVIPHLLVPDLLDALIETKARRVLPLNLAPQPGETEGFSPQRHLEVLGRHAPKLALDVVLADEAAVPDRDLLTDAAKRFGAAVELAPVARTDGSPRHDTELLAAAYDRIFRMHGRIGPWR
bacteria_71460		5256.01	2193.98		1.26029	0.327358		0.000118174	0.000512049		Actinobacteria		glyoxalase bleomycin resistance protein dioxygenase		hypothetical protein		MITEFLVDDVDRVHQNLTGFVTDFVNEPTTMPWGNRSLLFRDPDGNLVNFFTPVTPAAIEKFAR
bacteria_26151		17663.5	7356.64		1.26357	0.241542		1.68362e-07	1.49947e-06		Actinobacteria	ko:K13640	transcriptional regulator	hspR	Putative heat shock protein HspR		MDGRRRNPYELTEETPVYVISVAAQLSGLHPQTLRQYDRLGLVSPDRTPGRGRRYSARDIELLRTVQQLSQDEGINLAGIKRIIELENQVAALQQRVAELQSAVEGAAAAMQQREAAVHASYRRDLVPYQEVQQTSALVVWRPKRQQSD
bacteria_214027		40743.3	16955.2		1.26481	0.192747		5.30917e-11	1.18451e-09		Actinobacteria		Radical SAM	pqqE	Putative mycofactocin radical SAM maturase MftC		MTSPALPAHSTRRLVDLFEYGLAAPICLTWELTYACNLSCVHCLSSSGRRDPRELSTSEAKAVIDELEAMQVFYVNIGGGEPTVRPDFWDLLDYATSHHVGVKFSTNGVRITPEAARRLARNDYVDVQISLDGATPEVNDAVRGAGSYATALRAMENLAAAGMKNFKLSVVCTRHNIPQMDAFKALADRYGAQLRLTRLRPSGRGADVWDDLRPAREQQRQLYDWLLAHGESVLTGDSFFHLSAYGQALPGLNLCGAGRVVCLVDPVGDVYACPFAIHDEFLAGNVRDPGGFTGVWRESALFRDLRSPQTGGACASCGFYDTCKGGCMAAKFFTGLPLDGPDPECVQGYGEDLLAERPADRAHLPRPSQDHSRRRPVDLPLPARRADLERPPVSDCAQD…
bacteria_11022		10874.9	4524.06		1.26523	0.210833		1.9601e-09	2.81039e-08		Actinobacteria	ko:K02357	Associates with the EF-Tu.GDP complex and induces the exchange of GDP to GTP. It remains bound to the aminoacyl-tRNA.EF- Tu.GTP complex up to the GTP hydrolysis stage on the ribosome	tsf	Elongation factor Ts		MPAEVVETERRVAEETTRAEGKPEAALPKIVEGRLNGFFKDATLLGQPYALDNKKSVQKVLDEAGVTLKRFTRIKVGI
bacteria_211906		10563.8	4389.51		1.26681	0.22193		1.1422e-08	1.36369e-07		Actinobacteria	ko:K06960	Belongs to the UPF0109 family	CP_0960	hypothetical protein		MLEEALEHLVKGIVDNPDDVQVASRDLRRGRVLEVRVHPDDLGKVIGRNGRTARALRTVVGAIGGRGVRVDLVDVDHVR
bacteria_43658		56927.2	23631.3		1.26838	0.1626		6.16188e-15	4.0627e-13		Actinobacteria	ko:K00088	Catalyzes the conversion of inosine 5'-phosphate (IMP) to xanthosine 5'-phosphate (XMP), the first committed and rate- limiting step in the de novo synthesis of guanine nucleotides, and therefore plays an important role in the regulation of cell growth	guaB	Inosine-5'-monophosphate dehydrogenase		MTANVDGVPDKFATLGLTYDDVLLLPGASAVLPNAVDTSSRISRNVRVNIPLLSAAMDKVTESRMAIAMARLGGVGVLHRNLSVEDQVNQVDLVKRSESGMVTDPITVHPEATLAEADALCAKFRISGVPVTDPAGKLLGIVTNRDMAFESDRSRQVREVMTPMPLVTGQVGISGTDAMDLLRKHKIEKLPLVDDSGVLKGLITVKDFVKAEKYPSAAKDSEGRLLVGAAVGASPEALERAQALAEAGVDFLVVDTSHGHNSNALSWMAKIKSSVGVDVIGGNVATRDGAQALIDAGVDGIKVGVGPGSICTTRVVAGIGVPQVTAIYEASLAARPAGIPLIGDGGLQYSGDIGKALAAGADTVMLGSLLAGCEESPGELQFINGKQFKSYRGMGSLGA…
bacteria_316488		45677.6	18939.1		1.27009	0.216649		4.56162e-09	5.90072e-08		Actinobacteria	ko:K04043	Heat shock 70 kDa protein	dnaK	Chaperone protein DnaK		MTGVEDLHQVGDDWDQRVVDYLVQQFKSGHGVDLAKDKMALQRLREAAEKAKIELSSSTETSINLPYITASAEGPLHLDEKLTRAQFQQLTADLLERCKTPFFNVMKDAGVSINEIDHVVLVGGSTRMPAVAELVKELTGGKDANKGVNPDEVVAIGAALQAGVLKGEVKDVLLLDVTPLSLGIETKGGIMTKLIERNTTIPTKRSEIFTTAEDNQPSVQIQVYQGEREIAAYNKKLGMFELTGLPPAPRGVPQIEVAFDIDANGIMHVTAKDLGTGKEQKMTVTGGSSLPKDEVDRMRQEAEQYADEDHRRREAAETRNQGEQLVYQTEKFIADNKDKLPEDVKSEVEAAVADLKEKLKNESADGDNTAAIREATEKVAATSQKLGQALYANAQADGA…
bacteria_93753		32745.9	13561		1.27184	0.16672		2.37369e-14	1.30258e-12		Actinobacteria	ko:K01428	Belongs to the metallo-dependent hydrolases superfamily. Urease alpha subunit family	ureC	Urease subunit alpha		MPEISRAAYADLFGPTTGDRIRLADTDLLIEIEEDRSGGPGLAGDEAVFGGGKVIRESMGQSRATRAEGTPDTVITGVVVVDHWGVVKADVGIRDGRITGIGKAGNPDTMDGVHPDLVIGPETEIIAGNGRILTAGAIDAHVHFICPQIADEALASGVTTLVGGGTGPAEGSKATTVTPGPWHLARMLEAMEEYPLNIGFLGKGNTVSHDAMLSQIRGGALGLKLHEDWGSTPAVIDASLTVAERTGIQVAIHTDTLNEAGFVGDTLAAIAGRGIHAYHTEGAGGGQIGRAHV
bacteria_358010		25466.3	10545.4		1.27195	0.161436		3.30055e-15	2.35164e-13		Actinobacteria		P-aminobenzoate N-oxygenase AurF		hypothetical protein		MDEARHAEIYGRFLHEKIGMLYPVNDNLQSLLGDTLRDSRWDMPYLGMQVLIEGLALAAFGLIRDTTDKPLPKQILAYVMQDEARHVAFGRMALRDYYQQLSDAELREREEFVIEGCYLMRDRLRGIEVLENFGIPKAEAEEYSEKSEFLHLFRQLLFSRIVPCVKDIGLWGKRLQEAYVDMGVFEMGNSNLDLLMAQDEEVAEKLDAERFAAEEGARVAEVQNAIDAGAASGPSSDA
bacteria_295469		28419	11758.2		1.27313	0.173261		2.0112e-13	8.6257e-12		Actinobacteria	ko:K02036	Part of the ABC transporter complex PstSACB involved in phosphate import. Responsible for energy coupling to the transport system	pstB	Phosphate import ATP-binding protein PstB 1		MAKRIDVSGLTAYYGSHKAIEDISMTVEPRSVTAFIGPSGCGKSTFLRTLNRMHEVTSGGRVEGKVLLDDEDLYGQGIDPVSVRREVGMVFQRPNPFPTMSIFDNVAAGLRLNGSYKKSELSEVVEKSLKGANLWNEVKDRLNKPGSGLSGGQQQRLCIARAIAVEPNVLLMDEPCSALDPISTLAIEDLIGELKERFTSVIVTHNMQQAARVSDRTAFFNLAAVGQPGRLIEIDETERIFSNPSVQATEDYISGRFG
bacteria_187385		26290.1	10875.8		1.27336	0.25073		3.80177e-07	3.0943e-06		Actinobacteria	ko:K05921	fumarylacetoacetate (FAA) hydrolase		hypothetical protein		MAIVIGKTARNIPPAEAGEYIAGYTIANDYGLHDFRDTDAGSMLRVKGSDTLCPLGPGLVTDWDFHGKSLRTYVNGKVVQDGSTDEMKWDMHYLVADIARTITLYPGDVLLSGTPANSRPVQPGDVVEVEVEGLGRLTNHIVTGPTSIRTDVGAQPTESEEVLSTALGGDWEFRGIRPPKR
bacteria_42935		12913.4	5341.03		1.27366	0.210227		1.37381e-09	2.0748e-08		Actinobacteria	ko:K00242,ko:K00246	succinate dehydrogenase	sdhD	hypothetical protein		MAAWLFMRLSGVVLVVLVLGHLLIQLVLDGGVSKIGFAFVAGRWASPFWQVWDLLMLWLAMLHGANGLRTVINDYAERANTRLWLKGLLYTATVFTILLGTLVIFTFDPNIR
bacteria_124438		51288.6	21212.7		1.27367	0.20834		9.75143e-10	1.53709e-08		Actinobacteria	ko:K06207	GTP-binding protein TypA	typA	GTP-binding protein TypA/BipA		MTLRSLTTALFSAPLPVPPRPTSGKGASAKAAVKDRKVTARQVKDRLDRELIGNVSLRVLDTERPDAWEVQGRGELALAILVEQMRREGFELTIGKPQVVTKIVDGKVYEHVERMTIDVPEEHMGAVTQLMGVRKGRMDNMSNHGSGWVRMEFVVPSRGLIGFRTEFLTGTRGTGIAHSIHEGHEPWFGTLTTRNNGSLVADRAGAVTAFAMTNLQERGVLFTDPGTEVYEGMIVGENSRSDDMDVNITKEKKLTNMRSASADSFEAIVPPRKLSLEQSLEFCRDDECVEVTPEAVRIRKVNLDARERARAASRAKHG
bacteria_353006		23920.6	9889.88		1.27416	0.263902		1.37816e-06	9.88715e-06		Actinobacteria	ko:K01714	Catalyzes the condensation of (S)-aspartate-beta- semialdehyde (S)-ASA and pyruvate to 4-hydroxy- tetrahydrodipicolinate (HTPA)	dapA	4-hydroxy-tetrahydrodipicolinate synthase		MTPYYNKPPQEGLFRHFAAIADATELPVMLYDIPGRSGVPISTETIVRLAEHPRIVANKDAKGDLGRASWAIARSGLAWYSGDDMLNLPLLSVGAVGFVSVVGHVVTPELRTLVEAYVSGDVQKATEIHQKLLPVFTGMFRTQGVMTTKAALALQGLPAGPLRAPMVELSADEIAQLKIDLAAGGVQL
bacteria_87057		57425.1	23729.6		1.27498	0.183175		3.3921e-12	9.94002e-11		Actinobacteria	ko:K03106	Involved in targeting and insertion of nascent membrane proteins into the cytoplasmic membrane. Binds to the hydrophobic signal sequence of the ribosome-nascent chain (RNC) as it emerges from the ribosomes. The SRP-RNC complex is then targeted to the cytoplasmic membrane where it interacts with the SRP receptor FtsY	ffh	Signal recognition particle protein		MRGRILWKTLRLPPTPRTDAAVFDTLSDRLSATFKNLRGKGRLSEADIDATAREIRIALLEADVALPVVRTFIKNVKERALGSDVSKALNPAQQVLKIVNEELVTILGGETRRLRFAKQPPTVIMLAGLQGAGKTTLAGKLGRWLKEQGHSPLLVAADLQRPNAVNQLSVVAERAGVSVYAPEPGNGVGDPVKVAKDSIEFAKSKVHDIVIVDTAGRLGIDQELMQQAADIRDAVSPDEILFVVDAMIGQDAVNTAESFRDGVGFDGVVLSKLDGDARGGAALSIRQITGKPIMFASNGEKLDDFDAFHPDRMASRILDMGDLLTLIEQAEKTFSQEEAEKMASKLASKKGQDFTLDDFLAQMEQVRKMGSISKLLGMLPGMGQIKDQINNLDERDVDR…
bacteria_375890		8231.91	3399.86		1.27573	0.298585		1.93213e-05	0.000104056		Actinobacteria		ATP-binding protein		hypothetical protein		MEVKIGVQHAPREIVLESGQSAEEVEQAVADALAGKSALLSLVDDHGRKVLVPADRLAYVELGEPTARKVGFSAL
bacteria_155984		20970.5	8658.92		1.2761	0.203993		3.96001e-10	7.0325e-09		Actinobacteria		dehydratase		Mesaconyl-CoA hydratase		MQFGRYYEEFEVGAVYKHWPGKTVTEYDDHLFCLLTMNHHPLHMYVNYAEKTTDFGKNVVVGNYIYSLLLGMSVPDVSGKAIANLEIESLRHVAPTFHGDTIYGETTVLDKWPSKSKNDRGIVYVETKGYKQDGTLVCVFRRKVMVPTETYIKERGGEQPGRPELTAPADKNTEK
bacteria_204990		15517.9	6403.54		1.27696	0.256582		6.46382e-07	4.99413e-06		Actinobacteria				hypothetical protein		MIAIRSENSTSSEMSWVMKTTEKPSVSRSLIIWPRICRCTTTSSAVVGSSMMTISGSSARAIAIITRCRMPPESWCGYDESRSTGMPTSDNSSRPRPVRAARFIDGRWVRRTSSICEPTEMTGFRAFIAPWNTIAISFQRSTCSCFSVNVSRSWPLNST
bacteria_211085		23613.7	9727.7		1.27939	0.277324		3.96203e-06	2.54208e-05		Actinobacteria	ko:K02892	One of the early assembly proteins it binds 23S rRNA. One of the proteins that surrounds the polypeptide exit tunnel on the outside of the ribosome. Forms the main docking site for trigger factor binding to the ribosome	rplW	hypothetical protein		MATRHPSIASKAAKAAKAARVAKARRHEAEGKNTVVTPASKAFTDPRDVLLKPVVSEKSYALLDEGKYTFIVAPGANKTQIKQAVQAVFSVKVTGVNTINRQGKRKRTRTGFGKRADSKRAIVTLAEGDRIDIFGGPTA
bacteria_213131		32900.8	13544.6		1.28038	0.149475		1.07313e-17	2.25741e-15		Actinobacteria	ko:K00134	Belongs to the glyceraldehyde-3-phosphate dehydrogenase family	gap	Glyceraldehyde-3-phosphate dehydrogenase 2		MTRIAINGFGRIGRNVLRALLERDSALEVVAVNDLTEPATLARLLAYDSTAGRLGRPVTAEGNTLVVDGRRITVLAEREPAQLPWAELGVDIVLEATGRFTSAKAARAHLDAGAKKVLVSAPSDGADVTLAYGVNTDAYDPEVHTIVSNASCTTNALAPLAKVLDDLAGIEHGFMTTVHAYTQEQNLQDGPHRDARRARAAGVNIVPTTTGAAKAIGLVLPNLDGKLSGDSIRVPVPVGSIVELNTTVSRDVTREDVLAAYRSAAEGPLAGVLEYSEDPLVSSDITGNPASSIFDSALTRVEGRHVKVVAWYDNEWGFSNRVIDTLELLANG
bacteria_76242		7464.56	3063.01		1.28494	0.305341		2.57387e-05	0.000134081		Actinobacteria	ko:K03702,ko:K08999	damaged site, the DNA wraps around one UvrB monomer. DNA wrap is dependent on ATP binding by UvrB and probably causes local melting of the DNA helix, facilitating insertion of UvrB beta-hairpin between the DNA strands. Then UvrB probes one DNA strand for the presence of a lesion. If a lesion is found the UvrA subunits dissociate and the UvrB-DNA preincision complex is formed. This complex is subs…	uvrB	UvrABC system protein B		MRPVSHIERTVAPFEVVSPYQHSGDQPAAIAELAKRIEAGEKDVVLLGATGTGKSATTAWMIE
bacteria_20713		17784.6	7291.54		1.28627	0.294416		1.2489e-05	7.04597e-05		Actinobacteria		fumarate reductase	MA20_14860	hypothetical protein		MTTSVNPPLEIPALTDAEELTCDVLVIGGGTAGTMAALTAAEHGADVILLEKAHVRHSGALAMGMDGVNNAVIPGRAEPDDYVAEITRANDGIVDQSTVRQTATRGFAMVERLESYGVKFEKD
bacteria_63986		5547.49	2273.11		1.28702	0.357332		0.000316101	0.00122516		Actinobacteria	ko:K00596,ko:K00821	Belongs to the class-III pyridoxal-phosphate-dependent aminotransferase family	dgdA	2,2-dialkylglycine decarboxylase		MLLILDEAQTGLCRTGTWYAFERDGVVPDILTLSKTLGAGLPLAAVITSAEI
bacteria_45282		21932.1	8987.36		1.28702	0.21581		2.46627e-09	3.43413e-08		Actinobacteria	ko:K03530	Histone-like DNA-binding protein which is capable of wrapping DNA to stabilize it, and thus to prevent its denaturation under extreme environmental conditions	hup	Integration host factor subunit beta		MNKAQLVEAIADKVGGRQQAADAVDAVLDAIVRATVAGDRVSVTGFGSFEKVDRPARYARNPQTGERVRVKKTSVPRFRAGQGFKDLVSGTKKLPKNDVAVKKAPKGSLTGGASATVKKAAAKKATAKTAAAKKTTARKTTAKKTTATAKKTTAKKAPAKSTATAKTTAAKKTTAKKATAKKAPAKKATAKKAPARKSTARTTTAKKATARKR
bacteria_271024		36314.8	14861.4		1.28896	0.235227		4.26207e-08	4.38802e-07		Actinobacteria	ko:K10559	ABC transporter	rhaS	Autoinducer 2-binding protein LsrB		MRKSSVRRASAALAAATSLALALTACGGTTKNDVKNEGASAAATGKADPNAATKKGLTVGFLPKQVNNPYFTSADKGGEAALKTLGSSYKEVGPSSATDTSGQVSYVNTLTQQQVDAMAVSAQDPGALCTALKQAMKNDIKVVTYDSDTKTDCRNAFVSQASAEDLGRTEVQLLAEQIGYKGEIAILSAAQTATNQNTWIDFMKDELKDPKYKNIKLVKVAYGNDDAQQSFQQTQGLLQEYPNLKGIISPTTVGIKAAAQYLSGSKYKGKVKLTGLGTPNDMRKYVKNGTVEGFELWDPAKLGALAAQTAVALVSGQITGKEGETFKAGGTTYTIGKDGVINLGKPTVFTAKNIDQFNF
bacteria_211907		10574.9	4320.52		1.29129	0.237486		5.40824e-08	5.43902e-07		Actinobacteria	ko:K02959	Belongs to the bacterial ribosomal protein bS16 family	rpsP	30S ribosomal protein S16		MAVKIKLKRLGKIRSPHYRIVVADSRTRRDGRAIEEIGLYHPVQNPSRIEVDADRVAYWLGVGAQPTEPVLAILKKTGDWQKF
bacteria_64008		30122.5	12296.3		1.29259	0.296787		1.329e-05	7.45269e-05		Actinobacteria				hypothetical protein		MNSGTAGAGAAGAGFGAGLGPGRGPEATGVTGAAAAGFSATAGFGAGGRGAAGRAACAGEGAPGFAGAALRGAGLPPPLPCWRASVSLRTTGASIVEDAERTNSPSSWSLAMTTLLSTPNSLASSYTRTLATSLLLGPGASGPSLLHGRTHRVLIECSSQSRPTSNSRGTRAARGFRATLLTVLPAQQLSVCSTYWRNAFMSSAPGARNALVNARRRTAWSRQTRAGCTYAPRPGSVPRGSGTHASSIATMRSRSVLAARCLQPTQVRSGHARAGVRPDTLKSTSPYRPHPLGAAIERLLS
bacteria_62822		37107.8	15137.8		1.29353	0.235297		3.85344e-08	4.00531e-07		Actinobacteria		amino acid		hypothetical protein		MFAVASMFGFEATAIYGEEAREPRKTVPRATYLAVVVITGFFAFTSWMLISAHGASQATAEAGKALESGDAAAFVFAPIAAQFGGWVNDVLPILLATSLFAGLLAFHNSANRYLFSLGREGLLPQGLTAINRRHSPWVAGTVQTVIAVLLVVPFAVLGKDPVLTLFSWFSGVAVLGIMLLYFLTSVSVIVYFRRSGADTRLWNTLIAPVLGALGIAGAIWLIIANFTTLIGGDRTTALWLQATVPVVLILGVVAARLTRPRAETSD
bacteria_162961		35719.2	14562.4		1.29443	0.217422		2.6239e-09	3.62787e-08		Actinobacteria				hypothetical protein		MQGGFAGADLRGLRDDAGRRHEAGHLAPLVRGDQGDDATGLAGARGPAAAVEVVLVVGRRVDVDDEVEVVDVDAASRDVRRHQHVDVAGLELRQRAGALRLRLPAVQGGSPYPAVEEVLGETVDGVLGVEEHDHAAVAGGDLGGGRVLVRAVDVQHVVFHRRDRAGGGVDGVHDGVAEVATHEQVDVAVEGGGEQHALALGAYLVEQGGDLWHEAHVGHLVGLVEDRDGDLVQPAVAAVDEVLEASRGGDDDLGAPAQGARLPADRHPAHDRGEPQLHGAGVRGECVGDLLGQLTRRYEDQPQRLPGLGAPTGRTGQQRQPEGEGLAGAGAAAAEDVTAGQGVR
bacteria_86498		37898.9	15440.9		1.29537	0.214172		1.4642e-09	2.19444e-08		Actinobacteria	ko:K13527	AAA ATPase forming ring-shaped complexes	arc	Proteasome-associated ATPase		MAAHDDDINRGIRPGRGSEDPAGQVAYLEQEIAVLRRKLADSPRHTRILEERIVELQTNLAGVSAQNERLANTLREARDQIVALKEEVDRLAQPPAGFGVFLEANEDGTADIFTGGRKLRVNVSPSVELEELRRGQEVMLNEALNVVEAMEYERVGDIVTLKEILEDGERALVLGHTDEERVVRLAEPLLDVVIRPGDALLLEPRSGYVYEVVPKSEVEELVLEEVPDIGYEQIGGLGNQIEMIRDAVELPYLHPDLFKEHELRPPKGVLLYGPPGCGKTLIAKAVANSLAKKVAEVTGQAQGKSFFLNIKGPELLN
bacteria_350860		26779.9	10908.6		1.29567	0.190115		9.41343e-12	2.49378e-10		Actinobacteria	ko:K09013	FeS assembly ATPase SufC	sufC	Vegetative protein 296		MKQGETHAIMGPNGSGKSTLAYSLAGHPKYTITGGTVTLDGEDVLEMSVDERARAGLFLAMQYPVEVPGVSVSNFLRTSATAIRGEAPKLRTWVKEVRETMERLNMDPAFAERNVNEGFSGGEKKRHEILQLELLKPKVAILDETDSGLDVDALRVVSEGVNRVRETGEVGTLLITHYTRILRYIKPDFVHVFSGGRIVESGGAELADKLENEGYEAYTKGGVSA
bacteria_79478		29206.2	11878.5		1.29788	0.256446		4.16966e-07	3.35204e-06		Actinobacteria	ko:K03696	associated with various cellular activities	clpC	ATP-dependent Clp protease ATP-binding subunit ClpC1		MDFKNTVIIMTTNLGTRDISKGFNLGFAASGDKKTNYERMKNKVSDELKQHFRPEFLNRVDDVVVFPQLTQADILQIVDLMIGKVDERLKDRDMGIELSQSAKELLSTKGYDQVLGARPLRRTIQREIEDTLSEKILFGELRPGHIVVVDTEGEGETQTFTFRGEEKAALPDVPPIEQAAGGAGPNLSKEA
bacteria_287127		5304.15	2152.07		1.30156	0.362919		0.000335306	0.00129138		Actinobacteria	ko:K02913	Belongs to the bacterial ribosomal protein bL33 family	rpmG	50S ribosomal protein L33 2		MAATDVRTKITLACVECKERNYITKKNRRNDPDRLEMKKHCPRCNAHTAHRETR
bacteria_102232		21274	8629.02		1.30179	0.29167		8.07365e-06	4.77768e-05		Actinobacteria	ko:K00134,ko:K01596	Belongs to the glyceraldehyde-3-phosphate dehydrogenase family	gapA	Glyceraldehyde-3-phosphate dehydrogenase-like protein		MPPLKAMADEYGVLGGHVETVHSFTNDQNLLDNYHKADRRGRSAPLNMVITETGAASAVAKALPDLEAPITGSSIRVPVPDVSIAILSLRLGRETTREEVLDHLRDVSLTSPLKRQIDFTTAPDAVSSDFIGSRHSSIVDAGATKVDGDNAILYLWYDNEFGYSCQVVRVVQHVTGVEYPTYPAPAV
bacteria_167898		17483.5	7081.39		1.30383	0.289328		6.59326e-06	3.97757e-05		Actinobacteria	ko:K02825	Also displays a weak uracil phosphoribosyltransferase activity which is not physiologically significant	pyrR	Bifunctional protein PyrR		MDKQDTSDHQASDARPVLEGPDIARVLTRIAHEIVERAKGADDVVLLGIPTRGVFLAQRLAVKLEEITDRGIPVGSLDITMYRDDLRMHPPRALARTEIPGDGIDGRLVVLVDDVLFSGRTIRAALDALNDIGRPRAVQLAVLVDRGHRELPIRADYVGKNLPTSLRETVKVQLAEEDGRDTVLLGVKQT
bacteria_289413		35241.3	14270.1		1.30422	0.216802		1.79118e-09	2.58791e-08		Actinobacteria	ko:K00240	Succinate dehydrogenase and fumarate reductase iron-sulfur protein	sdhB	Succinate dehydrogenase iron-sulfur subunit		MATPTLDKADAAGAPEPGFGDSPYITVTFRIRRFNPEVSAEAVWDDFQLEIDPKERVLDGLHKIKWELDGTLTFRRSCAHGICGSDAMRINGKNRLACKTLIKDINPEKPITVEPIKGLTVLKDLVVDMEPFFQAFRDVMPFLITKDTNEPTRERFQTAEDRERFDDTTKCILCAACTSSCPVFWNDGQYFGPAAIVNAHRFIFDSRDEAGEQRLEILNDKDGVWRCRTTFNCTDACPRGIEVTKAIQEVKRALITRRV
bacteria_144488		17341.3	7020.85		1.30443	0.257549		4.08853e-07	3.29281e-06		Actinobacteria	ko:K02996	Belongs to the universal ribosomal protein uS9 family	rpsI	30S ribosomal protein S9		MAETTAEQPLEETELVDIDSYTTESEVPVEGEYTSESLASRFGEAQPAAGLGRRKNAIARVRIVPGSGKWKINGRTLEDYFPNKVHQQEVNEPFKVLELDNRYDVIARISGGGVSGQAGALRLGVARALNEADVDNNRGALKKAGFLTRDDRAVERKKAGLKKARKAPQYSKR
bacteria_115561		39991.9	16190.8		1.30449	0.184195		1.41972e-12	4.64565e-11		Actinobacteria		transcriptional regulatory protein	yebC	putative transcriptional regulatory protein		MSGHSKWATTKHKKAVIDAKRGKLFAKLIKNIEVAARMGGVDIEGNPTLYDAIQKAKKSSVPNKNIDSAVKRGGGLEAGGADYETIMYEGYGPNGVAVLIECLTDNRNRAASDVRVAMTRNGGSMADPGSVSYLFNRKGVVIVPKGELGEDDVLGAVLDAGAEEVNDLGESFEVISEATDLVAVRTALQDAGIDYDSADANFVPTMQVELDEEGAKKIFKLIDALEDSDDVQNVFANFDVSDEVMEKVDA
bacteria_227392		12728.8	5153.05		1.30451	0.279191		2.97606e-06	1.96881e-05		Actinobacteria	ko:K02961	One of the primary rRNA binding proteins, it binds specifically to the 5'-end of 16S ribosomal RNA	rpsQ	30S ribosomal protein S17		MSENNVTEETTEARGARKTREGLVVSDKMDKTVVVAVEDRVKHALYGKVIRRTNKLKAHDEQNAAGVGDRVIIMETRPLSSTKRWRIVEILEKAK
bacteria_242204		30391.1	12277.1		1.30762	0.171139		2.16049e-14	1.2005e-12		Actinobacteria	ko:K01011	sulfurtransferase	sseA1	Putative thiosulfate sulfurtransferase		MSRSDVLVNADWVEANLDNPDIAIVEVDEDTSAYEKNHIRNAIRIDWTKDLQDPVRRDFVDQEGFEKLLSAKGIANDTLVILYGGNNNWFASYAYWYFKLYGHENVKLLDGGRKKWELDARELVEEVPERTETTYTAKPQNKSIRAFRDDVVAAIGSQNLVDVRSPDEFSGKLLAPAHLPQEQSQRPGHVPSARNIPWSKNANDDGTFKSDDELKELYAEEQVDLAKDTIAYCRIGERSALTWFVLHELLGVENVKNYDGSWTEYGSLVGVPIELGANK
bacteria_142054		21453.7	8644.18		1.31136	0.198203		3.68402e-11	8.58744e-10		Actinobacteria		Response regulators consisting of a CheY-like receiver domain and a winged-helix DNA-binding domain		putative transcriptional regulatory protein TcrX		MVGAMTTTSPQGRTELLRPDGSPVRVLVVDDELSITELLSMALRYEGWQIRSAGDGQGAVQTAREFRPDAVVLDMMLPDMDGLAVLGRLRRDLPDVPVLFLTAKDAVEDRIAGLTAGGYDYVTKPFSLEEVVARLRGLIRRSGAADRRSDSVLVVGDLTLDEDSHEVSRAGENIHLTATEFELLRFLMRNPRRVLSKAQILDRVWSYDFGGQANVVELYISYLRRKIDAGREPMIHTRRGAGYLIKPAAS
bacteria_253207		36630.4	14746.1		1.31267	0.255093		2.66336e-07	2.2496e-06		Actinobacteria	ko:K02519	One of the essential components for the initiation of protein synthesis. Protects formylmethionyl-tRNA from spontaneous hydrolysis and promotes its binding to the 30S ribosomal subunits. Also involved in the hydrolysis of GTP during the formation of the 70S ribosomal complex	infB	Translation initiation factor IF-2		MEALESSLLQLDVGEEVDIRVLHRGVGAVTESDIDLAMGSDAIVIGFNVRAAGRAAQMAEREGVDVRYYSVIYQAIEEIEAALKGMLKPEYEEVELGTAEIREIFKSSKLGNIAGVLVRSGEVKRNTKARLIRDGKVIAENLNIEGLRRFKDDVTEIREGYEGGINLGNFNDIKIDDVIATYEMREKPRV
bacteria_297115		15478.2	6219.68		1.31523	0.255787		2.71985e-07	2.29183e-06		Actinobacteria	ko:K01737	6-pyruvoyl tetrahydropterin synthase	queD	hypothetical protein		MFSITVRDHIMIAHSFRGEVFGPAQRLHGATFLVDATFRREQLDDDNIVVDIGLATQELGAVVSELNYRNLDNEPDFAGINTSTEFLAKVIADRLAERIEKGALGEGARGLAGLTVSLHESHVAWASYERAL
bacteria_91823		33364.8	13395		1.31659	0.234535		1.98135e-08	2.19502e-07		Actinobacteria	ko:K01358	Cleaves peptides in various proteins in a process that requires ATP hydrolysis. Has a chymotrypsin-like activity. Plays a major role in the degradation of misfolded proteins	clpP	ATP-dependent Clp protease proteolytic subunit 2		MNDFPGSGIYARTEAEYTGPRAESRYVIPRFVERTSQGVREYDPYAKLFEERVIFLGVQIDDASANDVMAQLLCLESMDPDRDISVYINSPGGSFTALTAIYDTMQFVKPDIQTVCMGQAASAAAILLAAGTPGKRMALPNARVLIHQPYSETGRGQVSDLEIAANEILRMRGQLEDMLAKHSTTPIEKIREDIERDKILTAEDALSYGLIDQIISTRKMNNDNLR
bacteria_226684		38155.9	15294.6		1.31884	0.220886		2.3628e-09	3.3241e-08		Actinobacteria	ko:K04654,ko:K06281	Large subunit	hydB	Hydrogenase-2 large chain		MDPRHPWNQHTIPAPQKRNFDDKYSWVMSPRWFDGKDHLALDTGGGPIARLWSTALSGLVDIGYVKATGQSVVINLPRTMTKPETTFEWQIPKWSNALERNRARTYFQAYAAAVALHCAEKGLAEVRAGRTQTWEKFEVPDEGIGVGFTEAVRGVLSHHMVIRDGKIANYHPYPPTPWNASTRDTFGTPGPYEDAVQNTPIFEENTPENFKGIDIMRAVRSFDPCLPCGVHMYVGGGKTVKSMHVPTGLSGLGG
bacteria_135039		6639.49	2658.21		1.32071	0.211938		4.61769e-10	8.00731e-09		Actinobacteria	ko:K03088	belongs to the sigma-70 factor family, ECF subfamily	sigH	ECF RNA polymerase sigma factor SigR		MKAALQAIPEEFRIAVYLADVEGFAYKEIADIMGTPIGTVMSRLHRGRRQLRGMLEDYARERGLVPAGAGESNEAKGSGS
bacteria_306503		30898.8	12365.2		1.32123	0.218714		1.53247e-09	2.2581e-08		Actinobacteria	ko:K06177,ko:K06180	Responsible for synthesis of pseudouridine from uracil	rluD	putative RNA pseudouridine synthase		MSTVPEIRTLPVPDGLEGERVDAAISRMFGFSRTKAAEIAAAGKVTVDGSVVGKSERVHGGAWLEVEMPQAAAPVQIVAEPVEGMEIVHDDDDVVVIVKPVGVAAHPSPGWTGTTVIGGLAAAGYRISTSGAAERQGIVHRLDVGTSGLMVVAKSERAYTSLKRQFKERTVDKRYHTLVQGHPDPTSGTIDAPIGRHPNHDYKWAVTAEGKPSVTHYDLIEAFRAASLLDVKLETGRTHQIRVHMAAHRHPCVGDLTYGADPTLAKRLFLTRQWLHAVRLGFEHPGDGQWVEFESDYPADLQKALDQVREETYG
bacteria_151244		54270.2	21666		1.32472	0.514697		0.0100591	0.0214981		Actinobacteria				hypothetical protein		MGQTVIMVTHDPVAASYADRVVLLADGRLVRHHDHGLAHLADRHAQEVEDLGTAAGVQVAGRLVGEDDLGTGDERTGTRHALLLAAGQLGRAVAQAVAQAEDVDDGVEPLLVRLAAGQFQAQQDVLLRGQRRQEVERLEHEADAVAAQLGEVLVVQLGDLGLSDVDRTAVHRVQPREAVHERGLAGAGGTHDGGEPPGLERHVDAVERPHGGVTLAVDLHQVVGRRGGSSDCAHIGHQCRHVSCLPRRDRCLRGRSYFGALYADINSAARSASAWRMTTYGVSSRPRSYAMATASARREAPSLAMIREKCTDTVFSLM
bacteria_381035		42258.8	16868		1.32492	0.213956		5.92246e-10	9.9952e-09		Actinobacteria	ko:K02863	Binds directly to 23S rRNA. The L1 stalk is quite mobile in the ribosome, and is involved in E site tRNA release	rplA	50S ribosomal protein L1		MSKRSKALRAADEKIDREKQYAPLEAVRLAKETSTSKFDGTVEVAFRLGVDPRKADQMVRGTVNLPHGTGKTARVLVFATGDRAEAARAAGADIVGADELIDEVSKGRLDFDAVVATPDLMGKVGRLGRVLGPRGLMPNPKTGTVTPDVTKAVTDIKGGKIEFRVDKHSNLHFIIGKTSFDDTKLVENYGAALEEILRLKPSAAKGRYIKKAAISTTMGPGIPLDSNRTRNLLVEEDPAAV
bacteria_56759		58476.3	23324.7		1.32598	0.204311		8.58424e-11	1.8144e-09		Actinobacteria		Aldehyde dehydrogenase	paaN	N-succinylglutamate 5-semialdehyde dehydrogenase		MAAELTVHQLIATHRPTLDQALEAIRTRAYWSPHPEHPKAYGEHGSLDMAAGKAAFDALLGTRLDLGQPGTDGFVGGEVSPYGIELGVEYPHADVDVLLPAMKAGQKAWRDAGAEIRAVVCLEILKRISDRTHEFAHAVMHTSGQAFMMAFQAGGPHAQDRGLEAVAYAYVEQVRTPDTAEWTKPQGKRDPLALTKQFTPVPRGIGLVIGCNTFPTWNGYPGLFASLATGNAVLVKPHPRAVLPLALTVQVARDVLGEAGFDPNLVALTAERPGEGIAKTLATRPEIRIIDYTGSTEFGDWLEANARQAQVYTEKAGVNSVLVESAGDYKGMLANLAFSLSLYSGQMCTTPQNLLIPRDGIRTDEGPKTFDEVVADLARSVDGLLGDDARANALLGAIV…
bacteria_52181		91270.4	36382		1.32691	0.179639		1.50695e-13	6.62384e-12		Actinobacteria	ko:K00937	Catalyzes the reversible transfer of the terminal phosphate of ATP to form a long-chain polyphosphate (polyP)	ppk	Polyphosphate kinase		MSQSDTQAEVQHAQPSVGSIAAHRPHTVAAVVSDLEPYIDADLDTYEEAPYDGPQLPQGRFLDRERSWLAFNERVLELAEDPNTPMLERANFLAIFASNLDEFFMVRVAGLKRRIATGVATRSASGLQPREVLEMIWARSRELMARHAACYHEDVAPALAEEGIHLVRWSELQEKEQARLFTLFRHQIFPVLTPLAVDPAHPFPYISGLSLNLAVIVRNPVNGKRHFARVKVPPLLSRFLESSPGRYVPIEDVIAAHLEELFPGMEVLEHHTFRVTRNEDLEVEEDDAENLLKALEKELMRRRFGPPVRLEVEESIDREVLDLLVRELKISEAEVYPLPGPLDLTGLFRIAGLDRPELKYRKFVAGVHRDLAEVESASAPDIFASLRARDVLLHHPYDS…
bacteria_120916		45136.9	17990.3		1.32708	0.503805		0.00843579	0.0186816		Actinobacteria				hypothetical protein		MALHHVLTVGEVAEVEQARVQPLVVRRLGGEPRLELLVVDDAARRGVHQEHAARLQAPLRDHLVGRHVEHTGLGRQHDATVRGLPPAGGTQAVAVEHRADELTVGERDAGRAVPRLHQRRVELVERTALRIHRGVVLPRLRDHHQHRMRQAAAAEVQQLQHFVERRRVRPVGVADREQPREVAGDEIAVQQRFAGAHAVAVAADGVDLTVVRDEPERVRERPRGEGVRGETAVHQRDRRVEALVVQVREERRQLLGRQHSLVDDRARGQRREVHAAFVLDPLAQAEGQAVQRDTGLVAGALHEQLREVRRHRKRCRADVRRLRVDRNIAPAENDEVLLFGDAFDLPHRGGNRIPAV
bacteria_377129		15821.6	6305.71		1.32713	0.253512		1.64992e-07	1.47317e-06		Actinobacteria	ko:K22010	response regulator	pdtaR	putative transcriptional regulatory protein pdtaR		MPKLDGISAAEKIAEERIAPVLMLTAFSQRDLVERARDAGAMAYLVKPFSKSDVVPAIEMAVSRFTELRELENEIADLTLRLETRKLVDRAKSILQTEYGLTEPAAFRWIQKTSMDRRMSMQQVAEAVIQDADEKKSSKG
bacteria_326389		29873.5	11886.7		1.32947	0.22464		3.25415e-09	4.37268e-08		Actinobacteria		acetoacetate decarboxylase		acetoacetate decarboxylase		MSPVRGYFHPKTASGASSLIPSPPWRYSGDLLTVEYRTDPARVRELLPEPLDLADEDPGAVALIWADWQSCAASGDELLDPVLSQYKEAFAVVRCAYRGQTYSRCVHIWVDKDFAIARGLHQGYPKKLGSIHQTRPHPYGPAPRIEAGARFGATLAAADRRLAQAVVTLREPSETNGFVNAHPMAHHRWLPSIEKGKGLALDELIETGAASFEAGPAWVGEAELELFEAPTE
bacteria_49572		20782.9	8262.57		1.33069	0.291564		5.01965e-06	3.12314e-05		Actinobacteria		transcriptional	clgR_1	hypothetical protein		MILLRRLLGDVLRRQRQRQGRTLREVSSSARVSLGYLSEVERGQKEASSELLSAICDALDVRMSELMREVSDELALAELAQSAAATPSQPVPAPVRPMLGSVSVAGVPPERVTIKAPAEAVDVVAA
bacteria_378729		35827.7	14228.5		1.33226	0.251361		1.15678e-07	1.07073e-06		Actinobacteria	ko:K00620,ko:K00930	Catalyzes two activities which are involved in the cyclic version of arginine biosynthesis the synthesis of N- acetylglutamate from glutamate and acetyl-CoA as the acetyl donor, and of ornithine by transacetylation between N(2)-acetylornithine and glutamate	argJ	Arginine biosynthesis bifunctional protein ArgJ		MSVTAAKGFTAAGIAAGIKENGNPDLALVVNNGPRRAAAGVFTSNRVKAAPVLWSEQVLKSGELTAVVLNSGGANACTGPKGFQDTHATAEKVAEVLEIGAGEVAVASTGLIGVLLPMDKLLPGIETAAGQLSEHGGEKAAIAIKTTDSVHKTSVVTKDGWTVGGMAKGAGMLAPGLATMLVVLTTDADLDGGTLDKALRDATRVTFDRVDSDGCMSTNDTVLLLASGASDVSPPYEEFAEAVRTVCDDLGQQLIRDAEGASKDIKVEVVGAASEDDAVEVGRSIARNNLLKCAVHGEDPNWGRVLSAIGTTSAAFEPDRLNVAINGVWVCRNGGVGEDRDQVDMRYREVHIVADLAAGSESAVIWTNDLTADYVHENSAYSS
bacteria_168010		61261	24239.2		1.33761	0.198153		1.47455e-11	3.74895e-10		Actinobacteria	ko:K02316	RNA polymerase that catalyzes the synthesis of short RNA molecules used as primers for DNA polymerase during DNA replication	dnaG	DNA primase		MKAVRDAVPIDAVVSEYLQLRNAGGGNLKGLCPFHDEKSPSFQVSPSKGLFHCFGCQEGGDTITFVMKVDHLSFSEAVERLAGQAGITLRYEEGGYNPSHQRGERIRLVEAHKIAADWYMEQLATSPEADTGRQFLAERGFDQAAAAHFSVGYSPQGWDHLTRFLRGKGFTDKELLLSGLSQEGRRGPIDRFRGRLMWPIRDIGGDVVGYVARKLYEADNGPKYLNTPDTAIYRKSQVLYGIDLAKKDIAKASRAVVVEGYTDVMACHLAGVTTAIATCGTAFGGDHIKILRRLLMDNGSARVIFTFDGDAAGQKAALRAFEDDQKFAAETYIAIAPDGMDPCELRLAKGDEAVADLAEPRTPLFEFALRQIVVRYDLDTPAGRAAALDEAAPIVARIK…
bacteria_109421		38885.7	15382.5		1.3379	0.175141		2.18957e-14	1.21284e-12		Actinobacteria		Fe-S oxidoreductase	fadF	putative iron-sulfur-binding oxidoreductase FadF		MRLTELAPLAVEYLYWVGCAGSLEDRAKKTTKAFAELLHIAGVKFAIMGGDEKCTGDSARRLGNEPLFQELGMENVMALNMAFGEELDDDGKVVAESAKPKSAKKIVATCPHCLNTIGNEYPQLGGDYEVIHHTQLLQHLVDEGKLVPVTPVEGIITYHDPCYLGRHNKIYTPPREIIANVPGLRNEEMHRHKERGFCCGAGGARMWMEERIGKRINNERVDEALSLNPDIVSTACPFCLVMLTDSVNGKKNDGKAKESIQVVDVAQLLLESVRTPVVPQDATETANEPEPEPVK
bacteria_213893		32477.1	12844.3		1.33829	0.169437		2.82363e-15	2.06172e-13		Actinobacteria	ko:K07588	LAO AO transport system ATPase		putative GTPase		MQDVSTLVAQAREGRPRAVARLISLVEGASPQLREVMEALAPLTGNAYVVGLTGSPGVGKSTSTSALVTAYRKQGRRVGVLAVDPSSPFSGGALLGDRVRMSEHASDSGVYIRSMATRGHLGGLAWAAPQAIRVLDAAGCDVVLVETVGVGQSEVEIAAQADTSVVLLAPGMGDGIQAAKAGILEIGDVYVVNKADRDGADATARELNHMLGLGESRGPGDWRPPIVKTVAARAEGIDEVVEALEKHRAWMEERGVLAERRRTRAAHEVETIAVTALRERIGDLRGDRRLDALAERIVAGELDPYRAADELVEGLTRG
bacteria_147606		51260.8	20237.8		1.34078	0.224571		2.3665e-09	3.32614e-08		Actinobacteria		Belongs to the sodium solute symporter (SSF) (TC 2.A.21) family		Cation/acetate symporter ActP		MNSSYSVPAVALVVVATVLVGAFGLRISRTTSDFYVASRTVGPRLNAAAISGEYLSAASFLGIAGLVLVQGPDMLWYPVGYTAGYLVLLLFVAAPLRRSGAYTLPDFAEARLASQAVRRLAGAFVVGVGWLYLLPQLQGAGLTLTVLTGAPQWLGGVIVAAVVVATVAAGGMRSITFVQAFQYWLKLTALLVPALFLILAWQGDGAPSHAFEEPATFREQRVVRVDSTLDLKLESPLTVRVTGTVDGRRHEDQELRLPAGTHHIDRGTELTFAKGTTVPAADRGTSDGMSTSLAAGREERPLYATYGLILATFLGTMGLPHVVVRFYTSPHGVAARRTTVAVLGLIGCFYLLPPVYGALGRLYAPELTLTGDADAAVLLLPERMIGGLGGDLLGALVAG…
bacteria_186526		52517.6	20731.4		1.34096	0.181569		1.51992e-13	6.66428e-12		Actinobacteria	ko:K00239	succinate dehydrogenase	sdhA	Succinate dehydrogenase flavoprotein subunit		MFGKRAGISAAAYALQASWVELPEGAADSVVAGLEEIRTRPDGERFMEKYAPVMKDLASRDVVSRSIYTEIREGRGCGPEGDHVYLDLTHLPPEQLDAKLPDITEFARTYLGIEPYTDPIPIQPTAHYAMGGIPTNVEGEVLADNTTVVPGLYAAGEVACVSVHGANRLGTNSLLDINVFGKRAGIAAAEYSQKADYVELPEDPARLVLDQVERLRDATGTERVSVIRRELQETMDANVMVFRTEQTIKTAVEKIAELRERYLNVSIQDKGRRFNTDLLEAIELGNLLDLAEVMAVSALARKESRGGHYREDYPNRDDVNFMRHTMAYREVGDDGAESIRLDYKPVVQTRYQPMERKY
bacteria_76801		25078.5	9885.38		1.34304	0.230796		5.91392e-09	7.48635e-08		Actinobacteria	ko:K07033,ko:K09014	assembly protein sufB	sufB	hypothetical protein		MEWIDGNIGSKVTMKYPAVYLMGEHAKGETLSIAFAGEGQHQDAGSKMVHMAPNTSSNIVSKSVARGGGRTSYRGLVEIGEGAHGSKSNVLCDALLVDTISRSDTYPYVDVREDDVSMGHEATVSKVSDDQLFYLMSRGLSEFEAMAMIVRGFVEPIAKELPMEYALELNRLIELQMEGAVG
bacteria_153527		20132.9	7923.06		1.34534	0.286773		2.71469e-06	1.81464e-05		Actinobacteria	ko:K03718	AsnC family	asnC	hypothetical protein		MHSDVVASRSAEHRDSRESRNGSTPHLDAVSLAIIEQLQEDGRRPYAAIGKAVGLSEAAVRQRVQKLLDQGVMQIVAVTDPLTVGFRRQAMVGINVEGDVESIAEALTDMPEVEYVVMTAGSFDILAEIVCEDDDHLLDVINKRIRALPGVRSTESFVYLKLKKQTYMWGTR
bacteria_09721		79003.2	31071.6		1.3463	0.187291		6.56235e-13	2.42081e-11		Actinobacteria	ko:K00600	Catalyzes the reversible interconversion of serine and glycine with tetrahydrofolate (THF) serving as the one-carbon carrier. This reaction serves as the major source of one-carbon groups required for the biosynthesis of purines, thymidylate, methionine, and other important biomolecules. Also exhibits THF- independent aldolase activity toward beta-hydroxyamino acids, producing glycine and aldehyd…	glyA	Serine hydroxymethyltransferase		MSEQQPLSTESTAFRAALDVIRAVEPRVADAIGQEVHDQREMLKLIASENYASPATLLAMGNWFSDKYAEGTVGRRFYAGCRNVDTVESLAAEHARELFGARHAYVQPHSGIDANLVAFWSVLAQRVEVPALEKAGVRQVNDLSDADWAELRRAFGNQRMLGMSLDAGGHLTHGFRPNISGKMFDQRSYGTDPSTGLVDYDALRASAREFKPLIIVAGYSAYPRLVNFRIMREIADEVGATLMVDMAHFAGLVAGKVLTGDFDPIPHAQIVTTTTHTSLRGPRGGMVLCDDSLKDQVDRGCPMVLGGPLPHVMAAKAVALAEARRPEFRDYAQAVVDNARALAEGLMRRGATLVTGGTDNHLNLIDVASSYGLTGRQAETALLDSGIVTNRNAIPADPN…
bacteria_19212		41544.3	16332.9		1.34684	0.349254		0.000115095	0.00050129		Actinobacteria				hypothetical protein		MPNGSTRVSSPGSAIAASGVFCKASSTWNNGCRDNDRSGFSASTSRSKGRSWWAYAARFEVRTRSSSSRNVGSPEVSVRSTSVLTKNPTRSSSASSVRPAIGDPIGMSVPAPILVSSTASAACSTMNRLAPSARARSASPRCRSPSSWNSTVSPSAPPIAGRGRSVGSTSSSGSPSNAPRQNSICRDTRLRGSSSEPSSSRCHSV
bacteria_13458		10012.3	3933.7		1.34774	0.333203		5.23665e-05	0.000253095		Actinobacteria				hypothetical protein		MAKALLGYVGGSDPRLLAEMRRLQQRVQDLESELGRIQAENDELTAAASHDSLLESIDARQAEPALT
bacteria_252018		38572.8	15141.3		1.34905	0.246029		4.1749e-08	4.30651e-07		Actinobacteria	ko:K03090	belongs to the sigma-70 factor family	sigB	RNA polymerase sigma factor SigF		MSADQGSSKVLTLTKSETAPVVPVEPDVLDDVTAPEAPQAPALTTATGAIDTRTLSRSLFLRLATLAEDSPERVYVRDTLIELNLPLVRYAAARFRSRNEPMEDIVQVGTIGLIKAIDRFDCERGVEFPTFAMPTVVGEIKRFFRDTSWSVRVPRRLQELRLALTKASDELSQKLDRSPTVAELAAVLGVSEEDVVDGLAVGNAYTASSLDSPAPEDDGGEGSLADRLGYEDTALEGVEYRESLKPLLAKLPPRERRIIMLRFFANMTQSQIGEEVGISQMHVSRLLTRTLSQLREGLISD
bacteria_111129		47686.4	18718.6		1.34908	0.232822		6.85418e-09	8.59569e-08		Actinobacteria	ko:K00864	Key enzyme in the regulation of glycerol uptake and metabolism. Catalyzes the phosphorylation of glycerol to yield sn- glycerol 3-phosphate	glpK	Glycerol kinase		MDSWVIWNLTGGVDGGKHYTDVTNASRTMLMNLHTLEWDDKIAESIGVPLAMLPEIRSSAEVYGEVTGGIPVASALGDQQAALFGQTCFAEGEAKSTYGTGTFMLLNTGEKIINSYSGLLTTVGYRIGNDKPVYALEGSIAVTGSLVQWMRDQMGLISTAAEIETLALSVEDNGGAYFVPAFSGLFAPYWRSDARGVIAGLTRYVTKAHLARAVLEATAWQTREITDAMTKDSGVELAALKVDGGMTSNNLLMQTLSDFLDAPVVRPMVAETTCLGAAYAAGLAVGFWTSTDDLRANWRRAAEWTPNMAAEKRDREYKSWLKAVERTMGWLEDEN
bacteria_04719		24738.9	9704.13		1.35007	0.290938		3.47737e-06	2.26484e-05		Actinobacteria	ko:K00337	NDH-1 shuttles electrons from NADH, via FMN and iron- sulfur (Fe-S) centers, to quinones in the respiratory chain. The immediate electron acceptor for the enzyme in this species is believed to be ubiquinone. Couples the redox reaction to proton translocation (for every two electrons transferred, four hydrogen ions are translocated across the cytoplasmic membrane), and thus conserves the redox ene…	nuoH	NADH-quinone oxidoreductase subunit H		MSPYLAAEDLSMFGHDPWWLVVAKAVFCFAFLMVTVLFSIVWERKVVAWMQLRIGPNRHGPWGMLQSLADGVKLMLKEDLIVKRADKVVYVLAPIVAAIPAFMAIAVIPFGPADNEISIFGHRTTMQLTDLPIAMLYILAVASVGIYGIVLAGWSSGSTYPLLGGLRSCAQMISYEIAMKAGMAATIGART
[truncated: 7,416 more rows]

## Sheet: Sup. Table 8 -KEGGC&B-stress
Supplemental Table 8 Distinct abundant functions in stressed and non-stressed rhizometagenomes. Taxa indicates wether all sequences, sequences assigned to Alphaproteobacteria (APr), Beta-/ and Gammaproteobacteria (BGPr) or Actinobacteria (Act) were compared between stress treatments. All functions with a false discovery rate (FDR) < 0.01 are listed.
[truncated: 54 more rows]

[truncated: 6 more sheets: Sup. Table 9 -KEGGweb-stress, Sup. Table10-genes-genotype, Sup. Table 11-KEGGC&B-genotype, Sup. Table 12 KEGG-web-genotype, Sup. Table 13 plas-phag-stress, Sup.Table 14 plas-phag genotype]
